# Supplementary material for: Accurate prediction of metagenome-assembled genome completeness by MAGISTA, a random forest model built on alignment-free intra-bin statistics
Source: Environ Microbiome. 2022 Mar 5;17:9. doi: 10.1186/s40793-022-00403-7 (PMC8898458; doi:10.1186/s40793-022-00403-7)
Supplement: Supplementary file 1 — Additional file 1. Supplementary Tables S1, S4, S5 and S6. Supplementary Table S1: Bacterial strains in the HC227 mock. Supplementary Table S4: Alignment-based statistics and distribution parameters for the training datasets. Supplementary Table S5: Alignment-based statistics and distribution parameters for the test datasets. Supplementary Table S6: Relative importance of input variables for the Random Forest classifiers used by MAGISTA and MAGISTIC, respectively. [file 40793_2022_403_MOESM1_ESM.xlsx]

## Sheet: Supplementary Table 1
Supplementary Table 1 - bacterial strains in HC227 mock
ENA taxID	Strain number	Infraspecific name	Species	Genus	Family	Order	Class	Phylum	Kingdom	Extraction Protocol	Reads accession number	Reads accession number (alt)
1177578	LMG28633		Rhodococcus degradans	Rhodococcus	Nocardiaceae	Actinomycetales	Actinobacteria	Actinobacteria	Bacteria	DG - small	ERS3417868	SAMEA5613682
218139	LMG21773		Aeriscardovia aeriphila	Aeriscardovia	Bifidobacteriaceae	Bifidobacteriales	Actinobacteria	Actinobacteria	Bacteria	DG - large	ERS3417869	SAMEA5613683
1683	LMG11039		Bifidobacterium angulatum	Bifidobacterium	Bifidobacteriaceae	Bifidobacteriales	Actinobacteria	Actinobacteria	Bacteria	DG - large	ERS3417870	SAMEA5613684
160386	LMG19264		Corynebacterium casei	Corynebacterium	Corynebacteriaceae	Corynebacteriales	Actinobacteria	Actinobacteria	Bacteria	DG - large	ERS3417871	SAMEA5613685
1578165	LMG28586		Mycobacterium saopaulense	Mycobacterium	Mycobacteriaceae	Corynebacteriales	Actinobacteria	Actinobacteria	Bacteria	DG - small	ERS3417872	SAMEA5613686
1607685	LMG28391		Salininema proteolyticum	Salininema	Glycomycetaceae	Glycomycetales	Actinobacteria	Actinobacteria	Bacteria	DG - large	ERS3417873	SAMEA5613687
28447	LMG2891		Clavibacter michiganensis	Clavibacter	Microbacteriaceae	Micrococcales	Actinobacteria	Actinobacteria	Bacteria	Maxwell	ERS3417874	SAMEA5613688
33881	LMG8787		Curtobacterium luteum	Curtobacterium	Microbacteriaceae	Micrococcales	Actinobacteria	Actinobacteria	Bacteria	DG - large	ERS3417875	SAMEA5613689
1270	LMG4050		Micrococcus luteus	Micrococcus	Micrococcaceae	Micrococcales	Actinobacteria	Actinobacteria	Bacteria	Maxwell	ERS3417876	SAMEA5613690
1530043	LMG30148		Micromonospora endophitica	Micromonospora	Micromonosporaceae	Micromonosporales	Actinobacteria	Actinobacteria	Bacteria	Maxwell	ERS3417877	SAMEA5613691
1645681	LMG29427		Nakamurella silvestris	Nakamurella	Nakamurellaceae	Nakamurellales	Actinobacteria	Actinobacteria	Bacteria	DG - small	ERS3417878	SAMEA5613692
66712	LMG16412	freudenreichii	Propionibacterium freudenreichii	Propionibacterium	Propionibacteriaceae	Propionibacteriales	Actinobacteria	Actinobacteria	Bacteria	DG - large	ERS3417879	SAMEA5613693
67257	LMG23078	albus	Streptomyces albus	Streptomyces	Streptomycetaceae	Streptomycetales	Actinobacteria	Actinobacteria	Bacteria	DG - large	ERS3417880	SAMEA5613694
28444	LMG28488		Herbidospora osyris	Herbidospora	Streptosporangiaceae	Streptosporangiales	Actinobacteria	Actinobacteria	Bacteria	Maxwell	ERS3417881	SAMEA5613695
96101	LMG29180		Actinomadura glauciflava	Actinomadura	Thermomonosporaceae	Streptosporangiales	Actinobacteria	Actinobacteria	Bacteria	Maxwell	ERS3417882	SAMEA5613696
821	LMG17767		Bacteriodes vulgatus	Bacteroides	Bacteroidaceae	Bacteroidales	Bacteroidia	Bacteroidetes	Bacteria	Maxwell	ERS3417883	SAMEA5613697
28116	LMG28902		Bacteroides ovatus	Bacteroides	Bacteroidaceae	Bacteroidales	Bacteroidia	Bacteroidetes	Bacteria	CTAB - small + DG - small	ERS3417884	SAMEA5613698
818	LMG28903		Bacteroides thetaiotaomicron	Bacteroides	Bacteroidaceae	Bacteroidales	Bacteroidia	Bacteroidetes	Bacteria	CTAB - small	ERS3417885	SAMEA5613699
827	LMG6451		Bacteroides ureolyticus	Bacteroides	Bacteroidaceae	Bacteroidales	Bacteroidia	Bacteroidetes	Bacteria	Pitcher - large	ERS3417886	SAMEA5613700
28125	LMG6452		Prevotella bivia	Prevotella	Prevotellaceae	Bacteroidales	Bacteroidia	Bacteroidetes	Bacteria	DG - small	ERS3417887	SAMEA5613701
989	LMG1346		Marinilabilia salmonicolor	Marinilabilia	Marinilabiliaceae	Marinilabiliales	Bacteroidia	Bacteroidetes	Bacteria	CTAB - large	ERS3417888	SAMEA5613702
398039	LMG24015		Chitinophaga terrae	Chitinophaga	Chitinophagaceae	Chitinophagales	Chitinophagia	Bacteroidetes	Bacteria	CTAB - large	ERS3417889	SAMEA5613703
112234	LMG18212		Chryseobacterium joostei	Chryseobacterium	Flavobacteriaceae	Flavobacteriales	Flavobacteriia	Bacteroidetes	Bacteria	CTAB - large	ERS3417890	SAMEA5613704
421072	LMG24401		Epilithonimonas lactis	Epilithonimonas	Flavobacteriaceae	Flavobacteriales	Flavobacteriia	Bacteroidetes	Bacteria	CTAB - large	ERS3417891	SAMEA5613705
245	LMG4008		Flavobacterium aquatile	Flavobacterium	Flavobacteriaceae	Flavobacteriales	Flavobacteriia	Bacteroidetes	Bacteria	CTAB - large	ERS3417892	SAMEA5613706
225843	LMG28216		Formosa algae	Formosa	Flavobacteriaceae	Flavobacteriales	Flavobacteriia	Bacteroidetes	Bacteria	CTAB - large	ERS3417893	SAMEA5613707
279359	LMG22585		Gramella echinicola	Gramella	Flavobacteriaceae	Flavobacteriales	Flavobacteriia	Bacteroidetes	Bacteria	CTAB - large	ERS3417894	SAMEA5613708
988	LMG1345		Leeuwenhoekiella marinoflava	Leeuwenhoekiella	Flavobacteriaceae	Flavobacteriales	Flavobacteriia	Bacteroidetes	Bacteria	CTAB - large	ERS3417895	SAMEA5613709
662880	LMG28476		Deinococcus humi	Deinococcus	Deinococcaceae	Deinococcales	Deinococci	Deinococcus-Thermus	Bacteria	Maxwell	ERS3417896	SAMEA5613710
1299	LMG4051		Deinococcus radiodurans	Deinococcus	Deinococcaceae	Deinococcales	Deinococci	Deinococcus-Thermus	Bacteria	Pitcher - small	ERS3417897	SAMEA5613711
332249	LMG22925		Truepera radiovictrix	Truepera	Trueperaceae	Deinococcales	Deinococci	Deinococcus-Thermus	Bacteria	Maxwell	ERS3417898	SAMEA5613712
604332	LMG24878		Meiothermus rufus	Meiothermus	Thermaceae	Thermales	Deinococci	Deinococcus-Thermus	Bacteria	Maxwell	ERS3417899	SAMEA5613713
33934	LMG18397		Anoxybacillus flavithermus	Anoxybacillus	Bacillaceae	Bacillales	Bacilli	Firmicutes	Bacteria	DG - large	ERS3417900	SAMEA5613714
1423	LMG7135		Bacillus subtilis	Bacillus	Bacillaceae	Bacillales	Bacilli	Firmicutes	Bacteria	Pitcher - large	ERS3417901	SAMEA5613715
153151	LMG23037		Geobacillus toebii	Geobacillus	Bacillaceae	Bacillales	Bacilli	Firmicutes	Bacteria	DG - large	ERS3417902	SAMEA5613716
545501	LMG24024		Oceanobacillus oncorhynchi	Oceanobacillus	Bacillaceae	Bacillales	Bacilli	Firmicutes	Bacteria	Pitcher - large	ERS3417903	SAMEA5613717
1639	LMG10470		Listeria monocytogenes	Listeria	Listeriaceae	Bacillales	Bacilli	Firmicutes	Bacteria	Maxwell	ERS3417904	SAMEA5613718
1393	LMG7123		Brevibacillus brevis	Brevibacillus	Paenibacillaceae	Bacillales	Bacilli	Firmicutes	Bacteria	DG - large	ERS3417905	SAMEA5613719
189691	LMG24465		Paenibacillus elgii	Paenibacillus	Paenibacillaceae	Bacillales	Bacilli	Firmicutes	Bacteria	Maxwell	ERS3417906	SAMEA5613720
394098	LMG24411		Bhargavaea cecembensis	Bhargavaea	Planococcaceae	Bacillales	Bacilli	Firmicutes	Bacteria	DG - large	ERS3417907	SAMEA5613721
1071052	LMG26643		Lysinibacillus meyeri	Lysinibacillus	Planococcaceae	Bacillales	Bacilli	Firmicutes	Bacteria	DG - large	ERS3417908	SAMEA5613722
1459	LMG6928		Sporosarcina globispora	Sporosarcina	Planococcaceae	Bacillales	Bacilli	Firmicutes	Bacteria	Pitcher - large	ERS3417909	SAMEA5613723
586733	LMG25332		Staphylococcus devriesei	Staphylococcus	Staphylococcaceae	Bacillales	Bacilli	Firmicutes	Bacteria	Maxwell	ERS3417910	SAMEA5613724
1283	LMG13349		Staphylococcus haemolyticus	Staphylococcus	Staphylococcaceae	Bacillales	Bacilli	Firmicutes	Bacteria	DG - large	ERS3417911	SAMEA5613725
1285	LMG13351		Staphylococcus intermedius	Staphylococcus	Staphylococcaceae	Bacillales	Bacilli	Firmicutes	Bacteria	Maxwell	ERS3417912	SAMEA5613726
42858	LMG21025		Staphylococcus lentus	Staphylococcus	Staphylococcaceae	Bacillales	Bacilli	Firmicutes	Bacteria	Maxwell	ERS3417913	SAMEA5613727
37482	LMG21673		Laceyella sacchari	Laceyella	Thermoactinomycetaceae	Bacillales	Bacilli	Firmicutes	Bacteria	DG - large	ERS3417914	SAMEA5613728
147709	LMG23655		Carnobacterium inhibens	Carnobacterium	Carnobacteriaceae	Lactobacillales	Bacilli	Firmicutes	Bacteria	DG - large	ERS3417915	SAMEA5613729
903984	LMG26304		Enterococcus ureasiticus	Enterococcus	Enterococcaceae	Lactobacillales	Bacilli	Firmicutes	Bacteria	DG - large	ERS3417916	SAMEA5613730
526944	LMG26041		Tetragenococcus osmophilus	Tetragenococcus	Enterococcaceae	Lactobacillales	Bacilli	Firmicutes	Bacteria	DG - large	ERS3417917	SAMEA5613731
633807	LMG24833		Vagococcus penaei	Vagococcus	Enterococcaceae	Lactobacillales	Bacilli	Firmicutes	Bacteria	DG - large	ERS3417918	SAMEA5613732
1585	LMG6901	bulgaricus	Lactobacillus delbrueckii	Lactobacillus	Lactobacillaceae	Lactobacillales	Bacilli	Firmicutes	Bacteria	DG - large	ERS3417919	SAMEA5613733
29397	LMG7942	lactis	Lactobacillus delbrueckii	Lactobacillus	Lactobacillaceae	Lactobacillales	Bacilli	Firmicutes	Bacteria	DG - large	ERS3417920	SAMEA5613734
179838	LMG19667		Lactobacillus diolivorans	Lactobacillus	Lactobacillaceae	Lactobacillales	Bacilli	Firmicutes	Bacteria	DG - large	ERS3417921	SAMEA5613735
60520	LMG16673		Lactobacillus paraplantarum	Lactobacillus	Lactobacillaceae	Lactobacillales	Bacilli	Firmicutes	Bacteria	Pitcher - large	ERS3417922	SAMEA5613736
60520	LMG18398		Lactobacillus paraplantarum	Lactobacillus	Lactobacillaceae	Lactobacillales	Bacilli	Firmicutes	Bacteria	DG - small	ERS3417923	SAMEA5613737
60520	LMG21638		Lactobacillus paraplantarum	Lactobacillus	Lactobacillaceae	Lactobacillales	Bacilli	Firmicutes	Bacteria	Maxwell	ERS3417924	SAMEA5613738
1589	LMG9210		Lactobacillus pentosus	Lactobacillus	Lactobacillaceae	Lactobacillales	Bacilli	Firmicutes	Bacteria	DG - large	ERS3417925	SAMEA5613739
1589	LMG17677		Lactobacillus pentosus	Lactobacillus	Lactobacillaceae	Lactobacillales	Bacilli	Firmicutes	Bacteria	DG - large	ERS3417926	SAMEA5613740
1589	LMG18401		Lactobacillus pentosus	Lactobacillus	Lactobacillaceae	Lactobacillales	Bacilli	Firmicutes	Bacteria	DG - small	ERS3417927	SAMEA5613741
1589	LMG10755		Lactobacillus pentosus	Lactobacillus	Lactobacillaceae	Lactobacillales	Bacilli	Firmicutes	Bacteria	Maxwell	ERS3417928	SAMEA5613742
1590	LMG11405		Lactobacillus plantarum	Lactobacillus	Lactobacillaceae	Lactobacillales	Bacilli	Firmicutes	Bacteria	Pitcher - small	ERS3417929	SAMEA5613743
1590	LMG18021		Lactobacillus plantarum	Lactobacillus	Lactobacillaceae	Lactobacillales	Bacilli	Firmicutes	Bacteria	DG - small	ERS3417930	SAMEA5613744
1590	LMG18404		Lactobacillus plantarum	Lactobacillus	Lactobacillaceae	Lactobacillales	Bacilli	Firmicutes	Bacteria	DG - small	ERS3417931	SAMEA5613745
1590	LMG24832		Lactobacillus plantarum	Lactobacillus	Lactobacillaceae	Lactobacillales	Bacilli	Firmicutes	Bacteria	DG - small	ERS3417932	SAMEA5613746
1590	LMG26367		Lactobacillus plantarum	Lactobacillus	Lactobacillaceae	Lactobacillales	Bacilli	Firmicutes	Bacteria	DG - small	ERS3417933	SAMEA5613747
1590	LMG28651		Lactobacillus plantarum	Lactobacillus	Lactobacillaceae	Lactobacillales	Bacilli	Firmicutes	Bacteria	DG - small	ERS3417934	SAMEA5613748
1590	LMG9211		Lactobacillus plantarum	Lactobacillus	Lactobacillaceae	Lactobacillales	Bacilli	Firmicutes	Bacteria	Maxwell	ERS3417935	SAMEA5613749
271881	LMG9205	argentoratensis	Lactobacillus plantarum	Lactobacillus	Lactobacillaceae	Lactobacillales	Bacilli	Firmicutes	Bacteria	Pitcher - small	ERS3417936	SAMEA5613750
337330	LMG6907	plantarum	Lactobacillus plantarum	Lactobacillus	Lactobacillaceae	Lactobacillales	Bacilli	Firmicutes	Bacteria	DG - large	ERS3417937	SAMEA5613751
33965	LMG6909	cremoris	Leuconostoc mesenteroides	Leuconostoc	Leuconostocaceae	Lactobacillales	Bacilli	Firmicutes	Bacteria	DG - large	ERS3417938	SAMEA5613752
1364	LMG23383		Lactococcus piscium	Lactococcus	Streptococcaceae	Lactobacillales	Bacilli	Firmicutes	Bacteria	DG - large	ERS3417939	SAMEA5613753
1308	LMG6896		Streptococcus thermophilus	Streptococcus	Streptococcaceae	Lactobacillales	Bacilli	Firmicutes	Bacteria	DG - large	ERS3417940	SAMEA5613754
501571	LMG24109		Butyricicoccus pulicaecorum	Butyricicoccus	Clostridiaceae	Clostridiales	Clostridia	Firmicutes	Bacteria	Maxwell	ERS3417941	SAMEA5613755
1502	LMG11264		Clostridium perfringens	Clostridium	Clostridiaceae	Clostridiales	Clostridia	Firmicutes	Bacteria	DG - large	ERS3417942	SAMEA5613756
39491	LMG30912		Agathobacter rectalis	Agathobacter	Lachnospiraceae	Clostridiales	Clostridia	Firmicutes	Bacteria	Maxwell	ERS3417943	SAMEA5613757
105841	LMG28898		Anaerostipes caccae	Anaerostipes	Lachnospiraceae	Clostridiales	Clostridia	Firmicutes	Bacteria	DG - small	ERS3417944	SAMEA5613758
360807	LMG30946		Roseburia inulinivorans	Roseburia	Lachnospiraceae	Clostridiales	Clostridia	Firmicutes	Bacteria	Maxwell	ERS3417945	SAMEA5613759
853	LMG30944		Faecalibacterium prausnitzii	Ruminococcus	Ruminococcaceae	Clostridiales	Clostridia	Firmicutes	Bacteria	Maxwell	ERS3417946	SAMEA5613760
1517	LMG2811		Thermoanaerobacterium thermosaccharolyticum	Thermoanaerobacterium	Thermoanaerobacterales family iii incertae sedis	Thermoanaerobacterales	Clostridia	Firmicutes	Bacteria	DG - large	ERS3417947	SAMEA5613761
1323	LMG17756		Faecalicoccus pleomorphus	Faecalicoccus	Erysipelotrichaceae	Erysipelotrichales	Erysipelotrichia	Firmicutes	Bacteria	Maxwell	ERS3417948	SAMEA5613762
220670	LMG27212		Pectinatus sp.	Pectinatus	Selenomonadaceae	Selenomonadales	Negativicutes	Firmicutes	Bacteria	CTAB - small	ERS3417949	SAMEA5613763
39029	LMG25664		Megasphaera cerevisiae	Megasphaera	Veillonellaceae	Veillonellales	Negativicutes	Firmicutes	Bacteria	DG - small	ERS3417950	SAMEA5613764
29466	LMG30945		Veillonella parvula	Veillonella	Veillonellaceae	Veillonellales	Negativicutes	Firmicutes	Bacteria	Maxwell	ERS3417951	SAMEA5613765
1260	LMG12226		Finegoldia magna	Finegoldia	Peptoniphilaceae	Tissierellales	Tissierellia	Firmicutes	Bacteria	Maxwell	ERS3417952	SAMEA5613766
1755100	LMG29236		Fusobacterium gastrosuis	Fusobacterium	Fusobacteriaceae	Fusobacteriales	Fusobacteriia	Fusobacteria	Bacteria	Maxwell	ERS3417953	SAMEA5613767
76856	LMG13131	nucleatum	Fusobacterium nucleatum	Fusobacterium	Fusobacteriaceae	Fusobacteriales	Fusobacteriia	Fusobacteria	Bacteria	Maxwell	ERS3417954	SAMEA5613768
118	LMG29012		Planctomyces sp.	Planctomyces	Planctomycetaceae	Planctomycetales	Planctomycetacia	Planctomycetes	Bacteria	Maxwell	ERS3417955	SAMEA5613769
1908690	LMG29572		Fimbriiglobus ruber	Fimbriiglobus	Gemmataceae	Planctomycetales	Planctomycetia	Planctomycetes	Bacteria	DG - small	ERS3417956	SAMEA5613770
980254	LMG27778		Roseimaritima ulvae	Roseimaritima	Planctomycetaceae	Planctomycetales	Planctomycetia	Planctomycetes	Bacteria	Maxwell	ERS3417957	SAMEA5613771
240237	LMG21817		Woodsholea maritima	Woodsholea	Caulobacteraceae	Caulobacterales	Alphaproteobacteria	Proteobacteria	Bacteria	Maxwell	ERS3417958	SAMEA5613772
911205	LMG26586		Eilatimonas milleporae	Eilatimonas	Nof	Kordiimonadales	Alphaproteobacteria	Proteobacteria	Bacteria	CTAB - large	ERS3417959	SAMEA5613773
293089	LMG22193		Martelella mediterranea	Martelella	Aurantimonadaceae	Rhizobiales	Alphaproteobacteria	Proteobacteria	Bacteria	CTAB - large	ERS3417960	SAMEA5613774
34013	LMG23059		Blastobacter aggregatus	Blastobacter	Bradyrhizobiaceae	Rhizobiales	Alphaproteobacteria	Proteobacteria	Bacteria	CTAB - large	ERS3417961	SAMEA5613775
1036779	LMG26383		Bosea lupini	Bosea	Bradyrhizobiaceae	Rhizobiales	Alphaproteobacteria	Proteobacteria	Bacteria	Maxwell	ERS3417962	SAMEA5613776
108015	LMG21825		Bradyrhizobium yuanmingense	Bradyrhizobium	Bradyrhizobiaceae	Rhizobiales	Alphaproteobacteria	Proteobacteria	Bacteria	large	ERS3417963	SAMEA5613777
943830	LMG26467		Tardiphaga robiniae	Tardiphaga	Bradyrhizobiaceae	Rhizobiales	Alphaproteobacteria	Proteobacteria	Bacteria	CTAB - large	ERS3417964	SAMEA5613778
529	LMG3331		Ochrobactrum anthropi	Ochrobactrum	Brucellaceae	Rhizobiales	Alphaproteobacteria	Proteobacteria	Bacteria	Maxwell	ERS3417965	SAMEA5613779
302401	LMG22697		Mesorhizobium thiogangeticum	Mesorhizobium	Phyllobacteriaceae	Rhizobiales	Alphaproteobacteria	Proteobacteria	Bacteria	CTAB - large	ERS3417966	SAMEA5613780
36856	LMG7837		Ensifer saheli	Ensifer	Rhizobiaceae	Rhizobiales	Alphaproteobacteria	Proteobacteria	Bacteria	Maxwell	ERS3417967	SAMEA5613781
28099	LMG17935		Rhizobium rubi	Rhizobium	Rhizobiaceae	Rhizobiales	Alphaproteobacteria	Proteobacteria	Bacteria	CTAB - large	ERS3417968	SAMEA5613782
1745854	LMG29367		Ancylobacter pratisalsi	Ancylobacter	Xanthobacteraceae	Rhizobiales	Alphaproteobacteria	Proteobacteria	Bacteria	Maxwell	ERS3417969	SAMEA5613783
144023	LMG19863		Maricaulis parjimensis	Maricaulis	Hyphomonadaceae	Rhodobacterales	Alphaproteobacteria	Proteobacteria	Bacteria	Pitcher - large	ERS3417970	SAMEA5613784
1189325	LMG25334		Oceanicella actignis	Oceanicella	Rhodobacteraceae	Rhodobacterales	Alphaproteobacteria	Proteobacteria	Bacteria	Maxwell	ERS3417971	SAMEA5613785
265	LMG26195		Paracoccus baruchii	Paracoccus	Rhodobacteraceae	Rhodobacterales	Alphaproteobacteria	Proteobacteria	Bacteria	CTAB - large	ERS3417972	SAMEA5613786
221822	LMG22475		Phaeobacter inhibens	Phaeobacter	Rhodobacteraceae	Rhodobacterales	Alphaproteobacteria	Proteobacteria	Bacteria	CTAB - large	ERS3417973	SAMEA5613787
1075	LMG4305		Rhodobacter blasticus	Rhodobacter	Rhodobacteraceae	Rhodobacterales	Alphaproteobacteria	Proteobacteria	Bacteria	CTAB - large	ERS3417974	SAMEA5613788
483013	LMG24367		Ruegeria scottomollicae	Ruegeria	Rhodobacteraceae	Rhodobacterales	Alphaproteobacteria	Proteobacteria	Bacteria	Pitcher - large	ERS3417975	SAMEA5613789
909926	LMG25773		Tabrizicola aquatica	Tabrizicola	Rhodobacteraceae	Rhodobacterales	Alphaproteobacteria	Proteobacteria	Bacteria	CTAB - large	ERS3417976	SAMEA5613790
53501	LMG129		Thalassobius gelatinovorus	Thalassobius	Rhodobacteraceae	Rhodobacterales	Alphaproteobacteria	Proteobacteria	Bacteria	CTAB - large	ERS3417977	SAMEA5613791
104100	LMG1617		Acetobacter lovaniensis	Acetobacter	Acetobacteraceae	Rhodospirillales	Alphaproteobacteria	Proteobacteria	Bacteria	CTAB - large	ERS3417978	SAMEA5613792
437	LMG1668		Acidomonas methanolica	Acidomonas	Acetobacteraceae	Rhodospirillales	Alphaproteobacteria	Proteobacteria	Bacteria	CTAB - small	ERS3417979	SAMEA5613793
220990	LMG23083		Asaia krungthepensis	Asaia	Acetobacteraceae	Rhodospirillales	Alphaproteobacteria	Proteobacteria	Bacteria	CTAB - large	ERS3417980	SAMEA5613794
1181271	LMG26838		Endobacter medicaginis	Endobacter	Acetobacteraceae	Rhodospirillales	Alphaproteobacteria	Proteobacteria	Bacteria	Maxwell	ERS3417981	SAMEA5613795
142834	LMG21311		Gluconacetobacter azotocaptans	Gluconacetobacter	Acetobacteraceae	Rhodospirillales	Alphaproteobacteria	Proteobacteria	Bacteria	CTAB - large	ERS3417982	SAMEA5613796
442	LMG1408		Gluconobacter oxydans	Gluconobacter	Acetobacteraceae	Rhodospirillales	Alphaproteobacteria	Proteobacteria	Bacteria	CTAB - large	ERS3417983	SAMEA5613797
364410	LMG24392		Granulibacter bethesdensis	Granulibacter	Acetobacteraceae	Rhodospirillales	Alphaproteobacteria	Proteobacteria	Bacteria	CTAB - small	ERS3417984	SAMEA5613798
990373	LMG26243		Humitalea rosea	Humitalea	Acetobacteraceae	Rhodospirillales	Alphaproteobacteria	Proteobacteria	Bacteria	Maxwell	ERS3417985	SAMEA5613799
436	LMG1527		Komagataeibacter hansenii	Komagataeibacter	Acetobacteraceae	Rhodospirillales	Alphaproteobacteria	Proteobacteria	Bacteria	CTAB - large	ERS3417986	SAMEA5613800
153496	LMG27019		Kozakia baliensis	Kozakia	Acetobacteraceae	Rhodospirillales	Alphaproteobacteria	Proteobacteria	Bacteria	CTAB - small	ERS3417987	SAMEA5613801
320497	LMG24037		Neoasaia chiangmaiensis	Neoasaia	Acetobacteraceae	Rhodospirillales	Alphaproteobacteria	Proteobacteria	Bacteria	CTAB - small	ERS3417988	SAMEA5613802
661190	LMG27021		Neokomagataea thailandica	Neokomagataea	Acetobacteraceae	Rhodospirillales	Alphaproteobacteria	Proteobacteria	Bacteria	CTAB - small	ERS3417989	SAMEA5613803
257708	LMG24552		Roseomonas gilardii	Roseomonas	Acetobacteraceae	Rhodospirillales	Alphaproteobacteria	Proteobacteria	Bacteria	CTAB - large	ERS3417990	SAMEA5613804
231053	LMG23170		Saccharibacter floricola	Saccharibacter	Acetobacteraceae	Rhodospirillales	Alphaproteobacteria	Proteobacteria	Bacteria	CTAB - large	ERS3417991	SAMEA5613805
192	LMG13127		Azospirillum brasilense	Azospirillum	Rhodospirillaceae	Rhodospirillales	Alphaproteobacteria	Proteobacteria	Bacteria	CTAB - large	ERS3417992	SAMEA5613806
28077	LMG22237		Nitrospirillum amazonense	Nitrospirillum	Rhodospirillaceae	Rhodospirillales	Alphaproteobacteria	Proteobacteria	Bacteria	Maxwell	ERS3417993	SAMEA5613807
13656	LMG12537		Rhizorhapis suberifaciens	Rhizorhapis	Sphingomonadaceae	Sphingomonadales	Alphaproteobacteria	Proteobacteria	Bacteria	CTAB - large	ERS3417994	SAMEA5613808
1387165	LMG12553		Sphingobium xanthum	Sphingobium	Sphingomonadaceae	Sphingomonadales	Alphaproteobacteria	Proteobacteria	Bacteria	CTAB - large	ERS3417995	SAMEA5613809
152682	LMG19484		Sphingomonas melonis	Sphingomonas	Sphingomonadaceae	Sphingomonadales	Alphaproteobacteria	Proteobacteria	Bacteria	CTAB - large	ERS3417996	SAMEA5613810
542	LMG460		Zymomonas mobilis	Zymomonas	Sphingomonadaceae	Sphingomonadales	Alphaproteobacteria	Proteobacteria	Bacteria	CTAB - large	ERS3417997	SAMEA5613811
1287736	LMG26852		Achromobacter aegrifaciens	Achromobacter	Alcaligenaceae	Burkholderiales	Betaproteobacteria	Proteobacteria	Bacteria	Pitcher - large	ERS3417998	SAMEA5613812
511	LMG1229		Alcaligenes faecalis	Alcaligenes	Alcaligenaceae	Burkholderiales	Betaproteobacteria	Proteobacteria	Bacteria	CTAB - large	ERS3417999	SAMEA5613813
518	LMG1232		Bordetella bronchiseptica	Bordetella	Alcaligenaceae	Burkholderiales	Betaproteobacteria	Proteobacteria	Bacteria	CTAB - large	ERS3418000	SAMEA5613814
683354	LMG24812		Candidimonas nitroreducens	Candidimonas	Alcaligenaceae	Burkholderiales	Betaproteobacteria	Proteobacteria	Bacteria	Pitcher - large	ERS3418001	SAMEA5613815
90244	LMG6519		Oligella ureolytica	Oligella	Alcaligenaceae	Burkholderiales	Betaproteobacteria	Proteobacteria	Bacteria	Pitcher - small	ERS3418002	SAMEA5613816
643674	LMG3516		Paenalcaligenes hominis	Paenalcaligenes	Alcaligenaceae	Burkholderiales	Betaproteobacteria	Proteobacteria	Bacteria	Marmer	ERS3418003	SAMEA5613817
380911	LMG24012		Parapusillimonas granuli	Parapusillimonas	Alcaligenaceae	Burkholderiales	Betaproteobacteria	Proteobacteria	Bacteria	Pitcher - large	ERS3418004	SAMEA5613818
151784	LMG21665		Pigmentiphaga kullae	Pigmentiphaga	Alcaligenaceae	Burkholderiales	Betaproteobacteria	Proteobacteria	Bacteria	Pitcher - large	ERS3418005	SAMEA5613819
95486	R-68806	IIIA	Burkholderia cenocepacia	Burkholderia	Burkholderiaceae	Burkholderiales	Betaproteobacteria	Proteobacteria	Bacteria	Maxwell	ERS3418006	SAMEA5613820
95486	R-71051	IIIA	Burkholderia cenocepacia	Burkholderia	Burkholderiaceae	Burkholderiales	Betaproteobacteria	Proteobacteria	Bacteria	Maxwell	ERS3418007	SAMEA5613821
95486	R-71085	IIIA	Burkholderia cenocepacia	Burkholderia	Burkholderiaceae	Burkholderiales	Betaproteobacteria	Proteobacteria	Bacteria	Maxwell	ERS3418008	SAMEA5613822
95486	R-68675	IIIA	Burkholderia cenocepacia	Burkholderia	Burkholderiaceae	Burkholderiales	Betaproteobacteria	Proteobacteria	Bacteria	Maxwell	ERS3418009	SAMEA5613823
95486	R-67259	IIIB	Burkholderia cenocepacia	Burkholderia	Burkholderiaceae	Burkholderiales	Betaproteobacteria	Proteobacteria	Bacteria	Maxwell	ERS3418010	SAMEA5613824
95486	R-67581	IIIB	Burkholderia cenocepacia	Burkholderia	Burkholderiaceae	Burkholderiales	Betaproteobacteria	Proteobacteria	Bacteria	Maxwell	ERS3418011	SAMEA5613825
95486	R-68591	IIIB	Burkholderia cenocepacia	Burkholderia	Burkholderiaceae	Burkholderiales	Betaproteobacteria	Proteobacteria	Bacteria	Maxwell	ERS3418012	SAMEA5613826
95486	R-68599	IIIB	Burkholderia cenocepacia	Burkholderia	Burkholderiaceae	Burkholderiales	Betaproteobacteria	Proteobacteria	Bacteria	Maxwell	ERS3418013	SAMEA5613827
292	R-69596		Burkholderia cepacia	Burkholderia	Burkholderiaceae	Burkholderiales	Betaproteobacteria	Proteobacteria	Bacteria	Maxwell	ERS3418014	SAMEA5613828
482957	LMG22485		Burkholderia lata	Burkholderia	Burkholderiaceae	Burkholderiales	Betaproteobacteria	Proteobacteria	Bacteria	CTAB - large	ERS3418015	SAMEA5613829
87883	R-71006		Burkholderia multivorans	Burkholderia	Burkholderiaceae	Burkholderiales	Betaproteobacteria	Proteobacteria	Bacteria	Maxwell	ERS3418016	SAMEA5613830
87883	R-71089		Burkholderia multivorans	Burkholderia	Burkholderiaceae	Burkholderiales	Betaproteobacteria	Proteobacteria	Bacteria	Maxwell	ERS3418017	SAMEA5613831
87883	R-67121		Burkholderia multivorans	Burkholderia	Burkholderiaceae	Burkholderiales	Betaproteobacteria	Proteobacteria	Bacteria	Maxwell	ERS3418018	SAMEA5613832
87883	R-67196		Burkholderia multivorans	Burkholderia	Burkholderiaceae	Burkholderiales	Betaproteobacteria	Proteobacteria	Bacteria	Maxwell	ERS3418019	SAMEA5613833
87883	R-67258		Burkholderia multivorans	Burkholderia	Burkholderiaceae	Burkholderiales	Betaproteobacteria	Proteobacteria	Bacteria	Maxwell	ERS3418020	SAMEA5613834
87883	R-67536		Burkholderia multivorans	Burkholderia	Burkholderiaceae	Burkholderiales	Betaproteobacteria	Proteobacteria	Bacteria	Maxwell	ERS3418021	SAMEA5613835
87883	R-68768		Burkholderia multivorans	Burkholderia	Burkholderiaceae	Burkholderiales	Betaproteobacteria	Proteobacteria	Bacteria	Maxwell	ERS3418022	SAMEA5613836
95485	R-50394	Sequence type-51	Burkholderia stabilis	Burkholderia	Burkholderiaceae	Burkholderiales	Betaproteobacteria	Proteobacteria	Bacteria	Maxwell	ERS3418023	SAMEA5613837
95485	R-67113	Sequence type-51	Burkholderia stabilis	Burkholderia	Burkholderiaceae	Burkholderiales	Betaproteobacteria	Proteobacteria	Bacteria	Maxwell	ERS3418024	SAMEA5613838
60552	R-69593		Burkholderia vietnamiensis	Burkholderia	Burkholderiaceae	Burkholderiales	Betaproteobacteria	Proteobacteria	Bacteria	Maxwell	ERS3418025	SAMEA5613839
60552	R-67189		Burkholderia vietnamiensis	Burkholderia	Burkholderiaceae	Burkholderiales	Betaproteobacteria	Proteobacteria	Bacteria	Maxwell	ERS3418026	SAMEA5613840
93218	LMG16409	recA seq 1	Pandoraea apista	Pandoraea	Burkholderiaceae	Burkholderiales	Betaproteobacteria	Proteobacteria	Bacteria	Maxwell	ERS3418027	SAMEA5613841
351345	LMG25212		Polynucleobacter cosmopolitanus	Polynucleobacter	Burkholderiaceae	Burkholderiales	Betaproteobacteria	Proteobacteria	Bacteria	Pitcher - small	ERS3418028	SAMEA5613842
105219	LMG6866		Ralstonia mannitolilytica	Ralstonia	Burkholderiaceae	Burkholderiales	Betaproteobacteria	Proteobacteria	Bacteria	CTAB - large	ERS3418029	SAMEA5613843
80868	LMG5286		Acidovorax cattleyae	Acidovorax	Comamonadaceae	Burkholderiales	Betaproteobacteria	Proteobacteria	Bacteria	CTAB - large	ERS3418030	SAMEA5613844
80879	LMG4328		Curvibacter delicatus	Curvibacter	Comamonadaceae	Burkholderiales	Betaproteobacteria	Proteobacteria	Bacteria	CTAB - large	ERS3418031	SAMEA5613845
80866	LMG1226		Delftia acidovorans	Delftia	Comamonadaceae	Burkholderiales	Betaproteobacteria	Proteobacteria	Bacteria	CTAB - large	ERS3418032	SAMEA5613846
80881	LMG23381		Simplicispira metamorpha	Simplicispira	Comamonadaceae	Burkholderiales	Betaproteobacteria	Proteobacteria	Bacteria	Pitcher - large	ERS3418033	SAMEA5613847
54067	LMG5856		Xylophilus ampelinus	Xylophilus	Comamonadaceae	Burkholderiales	Betaproteobacteria	Proteobacteria	Bacteria	CTAB - large	ERS3418034	SAMEA5613848
279113	LMG23965		Collimonas pratensis	Collimonas	Oxalobacteraceae	Burkholderiales	Betaproteobacteria	Proteobacteria	Bacteria	CTAB - large	ERS3418035	SAMEA5613849
728004	LMG25547		Glaciimonas immobilis	Glaciimonas	Oxalobacteraceae	Burkholderiales	Betaproteobacteria	Proteobacteria	Bacteria	CTAB - large	ERS3418036	SAMEA5613850
1064518	LMG26149		Herbaspirillum soli	Herbaspirillum	Oxalobacteraceae	Burkholderiales	Betaproteobacteria	Proteobacteria	Bacteria	CTAB - large	ERS3418037	SAMEA5613851
47229	LMG21530		Massilia timonae	Massilia	Oxalobacteraceae	Burkholderiales	Betaproteobacteria	Proteobacteria	Bacteria	CTAB - large	ERS3418038	SAMEA5613852
1125875	LMG27282		Noviherbaspirillum psychrotolerans	Noviherbaspirillum	Oxalobacteraceae	Burkholderiales	Betaproteobacteria	Proteobacteria	Bacteria	CTAB - large	ERS3418039	SAMEA5613853
57480	LMG18919		Microvirgula aerodenitrificans	Microvirgula	Chromobacteriaceae	Neisseriales	Betaproteobacteria	Proteobacteria	Bacteria	Pitcher - large	ERS3418040	SAMEA5613854
484	LMG5297		Neisseria flavescens	Neisseria	Neisseriaceae	Neisseriales	Betaproteobacteria	Proteobacteria	Bacteria	Maxwell	ERS3418041	SAMEA5613855
72	LMG7828		Simonsiella muelleri	Simonsiella	Neisseriaceae	Neisseriales	Betaproteobacteria	Proteobacteria	Bacteria	Maxwell	ERS3418042	SAMEA5613856
876	LMG7529	desulfuricans	Desulfovibrio desulfuricans	Desulfovibrio	Desulfovibrionaceae	Desulfovibrionales	Deltaproteobacteria	Proteobacteria	Bacteria	Pitcher - small	ERS3418043	SAMEA5613857
881	LMG7563		Desulfovibrio vulgaris	Desulfovibrio	Desulfovibrionaceae	Desulfovibrionales	Deltaproteobacteria	Proteobacteria	Bacteria	Maxwell	ERS3418044	SAMEA5613858
603050	LMG24559		Arcobacter mytili	Arcobacter	Campylobacteraceae	Campylobacterales	Epsilonproteobacteria	Proteobacteria	Bacteria	CTAB - large	ERS3418045	SAMEA5613859
708186	LMG25535		Arcobacter trophiarum	Arcobacter	Campylobacteraceae	Campylobacterales	Epsilonproteobacteria	Proteobacteria	Bacteria	CTAB - large	ERS3418046	SAMEA5613860
199	LMG7788		Campylobacter concisus	Campylobacter	Campylobacteraceae	Campylobacterales	Epsilonproteobacteria	Proteobacteria	Bacteria	CTAB - large	ERS3418047	SAMEA5613861
32020	LMG6443	venerealis	Campylobacter fetus	Campylobacter	Campylobacteraceae	Campylobacterales	Epsilonproteobacteria	Proteobacteria	Bacteria	Maxwell	ERS3418048	SAMEA5613862
215	LMG18294		Helicobacter fennelliae	Helicobacter	Helicobacteraceae	Campylobacterales	Epsilonproteobacteria	Proteobacteria	Bacteria	Maxwell	ERS3418049	SAMEA5613863
210	LMG19449		Helicobacter pylori	Helicobacter	Helicobacteraceae	Campylobacterales	Epsilonproteobacteria	Proteobacteria	Bacteria	Maxwell	ERS3418050	SAMEA5613864
271417	LMG22214		Aeromonas molluscorum	Aeromonas	Aeromonadaceae	Aeromonadales	Gammaproteobacteria	Proteobacteria	Bacteria	CTAB - large	ERS3418051	SAMEA5613865
671278	LMG26473		Alishewanella tabrizica	Alishewanella	Alteromonadaceae	Alteromonadales	Gammaproteobacteria	Proteobacteria	Bacteria	CTAB - large	ERS3418052	SAMEA5613866
236100	LMG23835		Marinobacter algicola	Marinobacter	Alteromonadaceae	Alteromonadales	Gammaproteobacteria	Proteobacteria	Bacteria	CTAB - large	ERS3418053	SAMEA5613867
616992	LMG26650		Polycyclovorans algicola	Polycyclovorans	Pseudoalteromonadaceae	Alteromonadales	Gammaproteobacteria	Proteobacteria	Bacteria	CTAB - large	ERS3418054	SAMEA5613868
518738	LMG24424		Shewanella vesiculosa	Shewanella	Shewanellaceae	Alteromonadales	Gammaproteobacteria	Proteobacteria	Bacteria	CTAB - large	ERS3418055	SAMEA5613869
358592	LMG23818		Rheinheimera chironomi	Rheinheimera	Chromatiaceae	Chromatiales	Gammaproteobacteria	Proteobacteria	Bacteria	CTAB - large	ERS3418056	SAMEA5613870
133448	LMG3252		Citrobacter youngae	Citrobacter	Enterobacteriaceae	Enterobacterales	Gammaproteobacteria	Proteobacteria	Bacteria	CTAB - large	ERS3418057	SAMEA5613871
28141	LMG5740		Cronobacter sakazakii	Cronobacter	Enterobacteriaceae	Enterobacterales	Gammaproteobacteria	Proteobacteria	Bacteria	Maxwell	ERS3418058	SAMEA5613872
61645	LMG26064		Enterobacter asburiae	Enterobacter	Enterobacteriaceae	Enterobacterales	Gammaproteobacteria	Proteobacteria	Bacteria	CTAB - large	ERS3418059	SAMEA5613873
72407	LMG2095	pneumoniae	Klebsiella pneumoniae	Klebsiella	Enterobacteriaceae	Enterobacterales	Gammaproteobacteria	Proteobacteria	Bacteria	CTAB - large	ERS3418060	SAMEA5613874
988801	LMG26121		Rosenbergiella nectarea	Rosenbergiella	Enterobacteriaceae	Enterobacterales	Gammaproteobacteria	Proteobacteria	Bacteria	CTAB - large	ERS3418061	SAMEA5613875
59201	LMG7233	enterica	Salmonella enterica	Salmonella	Enterobacteriaceae	Enterobacterales	Gammaproteobacteria	Proteobacteria	Bacteria	CTAB - large	ERS3418062	SAMEA5613876
554	LMG21371		Pectobacterium carotovorum	Pectobacterium	Pectobacteriaceae	Enterobacterales	Gammaproteobacteria	Proteobacteria	Bacteria	CTAB - large	ERS3418063	SAMEA5613877
549	LMG1286		Pantoea agglomerans	Pantoea	Erwiniaceae	Enterobacterales	Gammaproteobacteria	Proteobacteria	Bacteria	CTAB - large	ERS3418064	SAMEA5613878
86187	LMG2186		Phaseolibacter flectens	Phaseolibacter	Erwiniaceae	Enterobacterales	Gammaproteobacteria	Proteobacteria	Bacteria	CTAB - large	ERS3418065	SAMEA5613879
53336	LMG22049		Tatumella citrea	Tatumella	Erwiniaceae	Enterobacterales	Gammaproteobacteria	Proteobacteria	Bacteria	CTAB - large	ERS3418066	SAMEA5613880
180434	LMG7874	morganii	Morganella morganii	Morganella	Morganellaceae	Enterobacterales	Gammaproteobacteria	Proteobacteria	Bacteria	CTAB - large	ERS3418067	SAMEA5613881
55214	LMG2698		Brenneria salicis	Brenneria	Pectobacteriaceae	Enterobacterales	Gammaproteobacteria	Proteobacteria	Bacteria	CTAB - large	ERS3418068	SAMEA5613882
556	LMG2804		Dickeya chrysanthemi	Dickeya	Pectobacteriaceae	Enterobacterales	Gammaproteobacteria	Proteobacteria	Bacteria	CTAB - large	ERS3418069	SAMEA5613883
1082705	LMG2724	quercina	Lonsdalea quercina	Lonsdalea	Pectobacteriaceae	Enterobacterales	Gammaproteobacteria	Proteobacteria	Bacteria	CTAB - large	ERS3418070	SAMEA5613884
555	LMG2404	carotovorum	Pectobacterium carotovorum	Pectobacterium	Pectobacteriaceae	Enterobacterales	Gammaproteobacteria	Proteobacteria	Bacteria	CTAB - large	ERS3418071	SAMEA5613885
1510574	LMG27719		Rahnella woolbedingensis	Rahnella	Yersiniaceae	Enterobacterales	Gammaproteobacteria	Proteobacteria	Bacteria	CTAB - large	ERS3418072	SAMEA5613886
61651	LMG7881		Serratia ficaria	Serratia	Yersiniaceae	Enterobacterales	Gammaproteobacteria	Proteobacteria	Bacteria	CTAB - large	ERS3418073	SAMEA5613887
61652	LMG5019		Serratia rubidaea	Serratia	Yersiniaceae	Enterobacterales	Gammaproteobacteria	Proteobacteria	Bacteria	CTAB - large	ERS3418074	SAMEA5613888
150052	LMG7899	enterocolitica	Yersinia enterocolitica	Yersinia	Yersiniaceae	Enterobacterales	Gammaproteobacteria	Proteobacteria	Bacteria	CTAB - large	ERS3418075	SAMEA5613889
229007	LMG26187		Halomonas ventosae	Halomonas	Halomonadaceae	Oceanospirillales	Gammaproteobacteria	Proteobacteria	Bacteria	CTAB - large	ERS3418076	SAMEA5613890
693965	LMG25435		Marinobacterium coralli	Marinobacterium	Oceanospirillaceae	Oceanospirillales	Gammaproteobacteria	Proteobacteria	Bacteria	CTAB - large	ERS3418077	SAMEA5613891
28254	LMG2864		Marinomonas communis	Marinomonas	Oceanospirillaceae	Oceanospirillales	Gammaproteobacteria	Proteobacteria	Bacteria	CTAB - large	ERS3418078	SAMEA5613892
727	LMG15863		Haemophilus influenzae	Haemophilus	Pasteurellaceae	Pasteurellales	Gammaproteobacteria	Proteobacteria	Bacteria	CTAB - large	ERS3418079	SAMEA5613893
470	LMG1041		Acinetobacter baumannii	Acinetobacter	Moraxellaceae	Pseudomonadales	Gammaproteobacteria	Proteobacteria	Bacteria	CTAB - large	ERS3418080	SAMEA5613894
90239	LMG11194		Moraxella canis	Moraxella	Moraxellaceae	Pseudomonadales	Gammaproteobacteria	Proteobacteria	Bacteria	CTAB - large	ERS3418081	SAMEA5613895
198481	LMG21276		Psychrobacter luti	Psychrobacter	Moraxellaceae	Pseudomonadales	Gammaproteobacteria	Proteobacteria	Bacteria	CTAB - large	ERS3418082	SAMEA5613896
287	LMG1242		Pseudomonas aeruginosa	Pseudomonas	Pseudomonadaceae	Pseudomonadales	Gammaproteobacteria	Proteobacteria	Bacteria	CTAB - large	ERS3418083	SAMEA5613897
1215918	LMG25420		Echinimonas agarilytica	Echinimonas	Vibrionaceae	Vibrionales	Gammaproteobacteria	Proteobacteria	Bacteria	CTAB - large	ERS3418084	SAMEA5613898
28169	LMG3897		Listonella pelagia	Listonella	Vibrionaceae	Vibrionales	Gammaproteobacteria	Proteobacteria	Bacteria	Pitcher - large	ERS3418085	SAMEA5613899
659	LMG4233		Photobacterium phosphoreum	Photobacterium	Vibrionaceae	Vibrionales	Gammaproteobacteria	Proteobacteria	Bacteria	CTAB - large	ERS3418086	SAMEA5613900
669	LMG4044		Vibrio harveyi	Vibrio	Vibrionaceae	Vibrionales	Gammaproteobacteria	Proteobacteria	Bacteria	CTAB - large	ERS3418087	SAMEA5613901
219571	LMG23003		Rhodanobacter fulvus	Rhodanobacter	Rhodanobacteraceae	Xanthomonadales	Gammaproteobacteria	Proteobacteria	Bacteria	CTAB - large	ERS3418088	SAMEA5613902
84531	LMG8760		Lysobacter antibioticus	Lysobacter	Xanthomonadaceae	Xanthomonadales	Gammaproteobacteria	Proteobacteria	Bacteria	CTAB - large	ERS3418089	SAMEA5613903
344882	LMG24163		Pseudoxanthomonas dokdonensis	Pseudoxanthomonas	Xanthomonadaceae	Xanthomonadales	Gammaproteobacteria	Proteobacteria	Bacteria	Pitcher - large	ERS3418090	SAMEA5613904
216778	LMG24537		Stenotrophomonas rhizophila	Stenotrophomonas	Xanthomonadaceae	Xanthomonadales	Gammaproteobacteria	Proteobacteria	Bacteria	Pitcher - large	ERS3418091	SAMEA5613905
53414	LMG5743		Xanthomonas populi	Xanthomonas	Xanthomonadaceae	Xanthomonadales	Gammaproteobacteria	Proteobacteria	Bacteria	Maxwell	ERS3418092	SAMEA5613906
644356	LMG17159	fastidiosa	Xylella fastidiosa	Xylella	Xanthomonadaceae	Xanthomonadales	Gammaproteobacteria	Proteobacteria	Bacteria	CTAB - large	ERS3418093	SAMEA5613907
239935	LMG27907		Akkermansia muciniphila	Akkermansia	Akkermansiaceae	Verrucomicrobiales	Verrucomicrobiae	Verrucomicrobia	Bacteria	Maxwell	ERS3418094	SAMEA5613908

## Sheet: Supplementary Table 4
dataset	binning method	Bin.Id	purity	completeness	F1	contamination	bin.size	w1k_GC.bin.part	w1k_GC.ncmp	w1k_GC.avg	w1k_GC.sdev	w1k_GC.skew	w1k_GC.kurt	w1k_GC.med	w1k_GC.p025	w1k_GC.p975	w1k_GC.p050	w1k_GC.p950	w1k_GC.p100	w1k_GC.p900	w5k_f4c.bin.part	w5k_f4c.ncmp	w5k_f4c.avg	w5k_f4c.sdev	w5k_f4c.skew	w5k_f4c.kurt	w5k_f4c.med	w5k_f4c.p025	w5k_f4c.p975	w5k_f4c.p050	w5k_f4c.p950	w5k_f4c.p100	w5k_f4c.p900	w10k_m3c.bin.part	w10k_m3c.ncmp	w10k_m3c.avg	w10k_m3c.sdev	w10k_m3c.skew	w10k_m3c.kurt	w10k_m3c.med	w10k_m3c.p025	w10k_m3c.p975	w10k_m3c.p050	w10k_m3c.p950	w10k_m3c.p100	w10k_m3c.p900	w10k_m4c.bin.part	w10k_m4c.ncmp	w10k_m4c.avg
HC227	Cc	HC227_Cc_0	95.5399	70.8363	81.3541	4.66828	5324127	1	9157	0.342414	0.0169428	-0.71066	4.58623	0.3435	0.3045	0.372	0.313	0.3675	0.321	0.3625	0.641713	1457778	0.0254228	0.0114518	1.82749	8.74332	0.022709	0.011516	0.054673	0.01274	0.04722	0.014321	0.039851	0.290602	13366	0.0514415	0.024462	1.22806	5.22658	0.0466295	0.0180941	0.11316	0.021138	0.0979795	0.025049	0.0841	0.290602	13366	0.140031
HC227	Cc	HC227_Cc_100	97.3182	62.0512	75.7826	2.75566	2147958	1	3415	0.365192	0.0143153	-0.355115	3.24988	0.366	0.336	0.391	0.34	0.387	0.346	0.383	0.37669	50403	0.0154913	0.00659622	1.6096	7.60588	0.014216	0.006689	0.0326236	0.007635	0.0280949	0.008829	0.023524	0.0923477	171	0.048358	0.0170784	0.905526	4.38667	0.046026	0.0202137	0.0907402	0.0240065	0.0780075	0.030371	0.072365	0.0923477	105	0.132081
HC227	Cc	HC227_Cc_101	73.8438	0.344371	0.685545	35.4209	11309	1	18	0.228222	0.0283835	-1.28294	2.95601	0.23925	0.170263	0.251287	0.173025	0.251075	0.1782	0.251	0.463436	0	NA	NA	NA	NA	NA	NA	NA	NA	NA	NA	NA	-1	1	1	NA	NA	NA	1	1	1	1	1	1	1	-1	1	1
HC227	Cc	HC227_Cc_102	81.5556	86.8207	84.1058	22.6158	5397123	1	10246	0.202949	0.0194455	-0.15046	3.82977	0.2045	0.162	0.2375	0.1695	0.2325	0.178	0.226	0.921806	7681240	0.0921054	0.0430954	2.646	17.8754	0.082664	0.040866	0.19325	0.04572	0.166325	0.051891	0.141773	0.796981	212878	0.180363	0.0877226	0.978755	3.96435	0.163478	0.0581827	0.394458	0.0687157	0.350751	0.0832791	0.301936	0.796981	212878	0.271822
HC227	Cc	HC227_Cc_103	99.9285	93.836	96.7865	0.0715695	4958170	1	9603	0.340626	0.0139072	-0.79725	5.8242	0.3415	0.3115	0.365	0.3175	0.3615	0.3235	0.357	0.984706	8074171	0.0277181	0.0164726	5.59991	62.2522	0.023996	0.012541	0.063323	0.01382	0.052013	0.015472	0.042486	0.923303	240471	0.0321732	0.0164196	1.67735	7.68445	0.028651	0.0112128	0.074801	0.013126	0.0634995	0.015668	0.052667	0.923303	240471	0.14461
HC227	Cc	HC227_Cc_104	9.31096	1.84148	3.07483	974.003	937132	1	1464	0.217603	0.0241786	0.340516	3.26739	0.215	0.172288	0.272213	0.180575	0.2605	0.1885	0.249	0.354397	17205	0.191612	0.0822823	0.700453	4.61746	0.181012	0.0405595	0.370839	0.0601836	0.334854	0.0968974	0.297136	0.205789	276	0.200963	0.0837985	-0.516684	2.71136	0.210785	0.0196205	0.338251	0.0299802	0.322605	0.0692	0.30207	0.205789	276	0.330561
HC227	Cc	HC227_Cc_105	84.7614	15.5608	26.2944	17.9782	1368063	1	2563	0.242844	0.0180475	0.309761	4.82667	0.2425	0.207	0.276475	0.215	0.271	0.221	0.265	0.91948	407253	0.146807	0.0655611	1.21368	4.87867	0.127658	0.066824	0.304056	0.07334	0.273032	0.08131	0.239412	0.737527	9591	0.140885	0.0852862	1.03192	3.32193	0.111837	0.0398633	0.342736	0.0471305	0.311813	0.056489	0.274546	0.737527	9591	0.307971
HC227	Cc	HC227_Cc_106	63.2207	95.8643	76.1933	58.176	5458563	1	10598	0.361938	0.0159701	-0.495319	3.90149	0.363	0.3275	0.3905	0.3345	0.386	0.3415	0.381	0.997946	10203903	0.030895	0.0191521	0.796065	3.22468	0.026365	0.008137	0.072246	0.009134	0.064181	0.010526	0.056511	0.923908	297606	0.0776018	0.0513788	0.692451	2.73904	0.062926	0.0146441	0.183755	0.017635	0.168295	0.021933	0.150605	0.923908	159895	0.170803
HC227	Cc	HC227_Cc_107	99.6389	79.2796	88.3009	0.362402	2681852	1	5251	0.209719	0.0207385	-0.640975	3.53379	0.2125	0.161	0.243375	0.169	0.238	0.1805	0.2335	0.991364	2785980	0.0959373	0.0448628	2.21401	12.3907	0.084499	0.043665	0.21085	0.048811	0.182168	0.054923	0.152255	0.966418	94395	0.0656168	0.0473421	2.55127	13.0562	0.051959	0.0178837	0.192541	0.0212624	0.157792	0.0259034	0.122034	0.966418	94395	0.212622
HC227	Cc	HC227_Cc_108	33.3308	97.734	49.709	200.023	11953290	1	23556	0.306276	0.0249172	-0.549062	3.58649	0.3085	0.255437	0.3465	0.2655	0.342	0.275	0.336	0.996102	59443156	0.0966926	0.0672106	2.67275	17.1988	0.083076	0.021523	0.245388	0.025679	0.200772	0.032658	0.169064	0.974566	2081820	0.100421	0.0528271	0.776565	3.81803	0.09429	0.0233895	0.217527	0.028712	0.194627	0.036991	0.170662	0.974566	2081820	0.272603
HC227	Cc	HC227_Cc_109	53.4159	94.3104	68.2028	87.21	3791278	1	7542	0.223944	0.0167241	-0.569843	4.38595	0.225	0.1855	0.254	0.1945	0.2485	0.2035	0.2435	0.999536	6732615	0.103348	0.0531322	1.26302	5.44413	0.098037	0.035635	0.244273	0.039532	0.200391	0.045068	0.166484	0.999536	257403	0.0898397	0.074052	2.23666	10.3591	0.077449	0.013511	0.315842	0.0164961	0.209339	0.0211252	0.161936	0.999536	257403	0.283296
HC227	Cc	HC227_Cc_10	53.8108	88.3174	66.8753	85.8362	3537233	1	6909	0.193762	0.0167511	-0.162878	3.73667	0.1945	0.1575	0.226	0.1647	0.22	0.173	0.214	0.98526	4652775	0.0678279	0.038281	0.307696	2.00165	0.06753	0.01717	0.138811	0.019245	0.128717	0.022219	0.117911	0.953157	152076	0.119777	0.0894317	0.276846	1.64408	0.116123	0.0147229	0.275008	0.0175088	0.255225	0.0213585	0.23488	0.953157	152076	0.237096
HC227	Cc	HC227_Cc_110	34.0208	95.4502	50.1625	193.938	7034498	1	13469	0.163469	0.0150995	-0.053802	3.19219	0.1635	0.133	0.1925	0.1385	0.188	0.144	0.1825	0.953709	14148540	0.035292	0.0154841	2.42306	13.6865	0.031857	0.017005	0.0748445	0.018746	0.062671	0.020978	0.052731	0.827635	395605	0.184106	0.0937294	1.49505	6.07983	0.164256	0.06244	0.442951	0.073709	0.370938	0.0887418	0.302184	0.827635	395605	0.239242
HC227	Cc	HC227_Cc_111	100	0.304722	0.607592	0	9906	1	16	0.354906	0.0197131	-0.598636	2.51993	0.356	0.318375	0.380312	0.32325	0.378625	0.32675	0.37675	0.573087	0	NA	NA	NA	NA	NA	NA	NA	NA	NA	NA	NA	-1	1	1	NA	NA	NA	1	1	1	1	1	1	1	-1	1	1
HC227	Cc	HC227_Cc_112	99.189	68.7402	81.2041	0.81761	2837188	1	5133	0.193669	0.0152196	-0.165801	3.32684	0.1945	0.162	0.2225	0.1675	0.2175	0.174	0.2125	0.839519	973710	0.0530654	0.0251303	1.73148	7.35377	0.0470715	0.022683	0.120723	0.02533	0.102692	0.028792	0.084861	0.518808	12720	0.095938	0.0536562	1.26173	4.37644	0.081118	0.0297024	0.234339	0.0351812	0.210358	0.0423987	0.176966	0.518808	12720	0.223268
HC227	Cc	HC227_Cc_113	63.0195	97.5867	76.5831	58.6811	4640718	1	8788	0.135607	0.0165986	0.0188731	2.79859	0.1355	0.104	0.167	0.1085	0.1625	0.114	0.157	0.915905	5629690	0.0222265	0.0157177	3.2706	18.2342	0.018426	0.007227	0.063771	0.008294	0.047123	0.009774	0.036786	0.777997	155961	0.120112	0.0615862	1.28764	5.26198	0.107411	0.03659	0.279891	0.044868	0.2427	0.05545	0.201691	0.777997	155403	0.177884
HC227	Cc	HC227_Cc_114	12.9557	0.242428	0.475951	671.864	111171	1	159	0.339299	0.0228548	-0.603517	3.36722	0.341	0.296475	0.375525	0.30035	0.3718	0.3075	0.3678	0.124619	36	0.0218616	0.016124	1.02779	3.43821	0.017114	0.00266037	0.0603597	0.00313625	0.0509467	0.004488	0.0447025	0.124619	0	NA	NA	NA	NA	NA	NA	NA	NA	NA	NA	NA	0.124619	0	NA
HC227	Cc	HC227_Cc_115	61.7625	98.3143	75.8653	61.9105	7996436	1	14545	0.21615	0.0247622	0.14079	3.52349	0.216	0.1675	0.267	0.1765	0.2575	0.1855	0.2465	0.752808	13392900	0.137606	0.0967597	2.09724	8.43994	0.105164	0.043892	0.414917	0.049641	0.336918	0.057381	0.262085	0.684467	435711	0.0799065	0.045963	1.59358	6.42072	0.067552	0.0252827	0.20216	0.0296495	0.171921	0.035471	0.141524	0.684467	435711	0.24103
HC227	Cc	HC227_Cc_116	27.2119	99.4455	42.731	267.487	20884215	1	41275	0.294018	0.0340116	-0.397962	2.47718	0.3	0.2265	0.3485	0.2355	0.342	0.2465	0.3345	0.998441	188383755	0.127601	0.105332	1.25692	4.49337	0.092829	0.019993	0.391375	0.023417	0.333027	0.028475	0.273578	0.988083	6798828	0.10334	0.0740344	0.925427	3.15621	0.078059	0.018101	0.272762	0.021991	0.24479	0.027807	0.21244	0.988083	6798828	0.242374
HC227	Cc	HC227_Cc_11	75.5928	96.0669	84.6088	32.2878	5582157	1	10972	0.304518	0.0283149	-0.664441	5.35955	0.305	0.2395	0.358	0.259	0.3515	0.274	0.341	0.996437	12622800	0.0907334	0.0825327	4.01088	22.8191	0.070021	0.026271	0.354496	0.031434	0.203624	0.037366	0.146238	0.97997	436645	0.0968235	0.0547905	0.964601	3.70597	0.08329	0.026262	0.224788	0.031236	0.200548	0.038089	0.174408	0.97997	436645	0.186984
HC227	Cc	HC227_Cc_12	23.3674	12.4357	16.2327	327.947	2572088	1	4002	0.264693	0.0253963	-0.405298	3.94879	0.266	0.209512	0.3125	0.221025	0.305	0.2335	0.295	0.328178	89253	0.223641	0.115473	0.996341	3.97098	0.200861	0.0633825	0.518336	0.0784368	0.449129	0.0980854	0.382325	0.137658	990	0.129461	0.079706	0.998285	3.70772	0.10899	0.0279094	0.328443	0.0342316	0.27876	0.0437128	0.238843	0.137658	990	0.290115
HC227	Cc	HC227_Cc_13	71.9748	91.2184	80.462	38.9376	4462355	1	8238	0.163212	0.0145377	0.0908807	3.05462	0.163	0.135	0.1925	0.1395	0.1875	0.145	0.182	0.884229	3365715	0.0389267	0.0241424	2.6516	14.9244	0.033379	0.013285	0.0989262	0.014927	0.080249	0.017264	0.065266	0.632629	61776	0.149601	0.0885904	0.924803	3.23142	0.125034	0.0391706	0.358013	0.0465832	0.321992	0.056403	0.281845	0.632629	61776	0.247177
HC227	Cc	HC227_Cc_14	86.902	77.2969	81.8185	15.0721	1737359	1	2987	0.254223	0.0207257	-0.987812	4.38794	0.2575	0.201325	0.2855	0.21565	0.2815	0.2275	0.2765	0.654798	183315	0.108097	0.0721915	1.99843	7.34524	0.083689	0.0390897	0.322137	0.0436297	0.270811	0.049474	0.206928	0.352708	1770	0.051523	0.0501202	2.81624	11.6738	0.0346685	0.0124957	0.223677	0.0147575	0.170276	0.017396	0.100641	0.352708	1770	0.149548
HC227	Cc	HC227_Cc_15	21.9855	95.6491	35.753	354.845	21047414	1	40999	0.327637	0.0175656	-0.91456	5.79852	0.329	0.288	0.3575	0.2975	0.353	0.307	0.348	0.984537	158357706	0.0432206	0.0313648	9.33487	151.59	0.037666	0.016461	0.100578	0.018857	0.080779	0.022086	0.065826	0.926818	5073705	0.0662607	0.0346004	1.21861	6.08616	0.060336	0.017911	0.146094	0.021995	0.129463	0.027818	0.112015	0.926818	5073705	0.205086
HC227	Cc	HC227_Cc_16	51.2662	91.7266	65.7721	95.0605	5695130	1	10922	0.215516	0.0238261	0.0927424	3.01686	0.2145	0.1695	0.263	0.177	0.256	0.186	0.2465	0.956262	9607536	0.0963414	0.0553182	1.67549	6.92665	0.081463	0.031967	0.242893	0.036358	0.206499	0.042909	0.169656	0.855504	269745	0.053875	0.0345825	1.83723	7.41812	0.045343	0.0147976	0.1536	0.017495	0.125886	0.021364	0.096878	0.855504	269745	0.219531
HC227	Cc	HC227_Cc_17	99.8024	94.7626	97.2172	0.197997	3224098	1	6106	0.290004	0.0218269	-1.1894	5.72239	0.293	0.2345	0.3235	0.2495	0.3195	0.264	0.314	0.938482	2634660	0.0624257	0.0425286	3.72914	24.031	0.050707	0.025269	0.172178	0.02796	0.132761	0.031452	0.102877	0.821773	68635	0.0710981	0.0343998	1.78764	9.24076	0.06416	0.0263418	0.157908	0.0306671	0.134055	0.036352	0.112738	0.821773	68635	0.206795
HC227	Cc	HC227_Cc_18	50.5882	0.123734	0.246865	97.6744	4335	1	6	0.167083	0.00994694	0.386222	2.25876	0.16725	0.155188	0.181438	0.155875	0.179875	0.15725	0.17675	-1	1	1	NA	NA	NA	1	1	1	1	1	1	1	-1	1	1	NA	NA	NA	1	1	1	1	1	1	1	-1	1	1
HC227	Cc	HC227_Cc_19	99.9243	93.6532	96.6871	0.0757787	7186882	1	13608	0.27083	0.026218	-0.496682	3.72924	0.273	0.21	0.316412	0.2225	0.3095	0.2365	0.3015	0.928834	12951505	0.116721	0.0866982	2.31659	9.15068	0.086153	0.040769	0.382873	0.04533	0.309298	0.051289	0.22667	0.813379	336610	0.049038	0.0319215	3.23727	20.3302	0.041178	0.016622	0.134624	0.019336	0.10545	0.022904	0.081371	0.813379	336610	0.230707
HC227	Cc	HC227_Cc_1	99.2202	92.7946	95.8999	0.785975	6640547	1	12358	0.31206	0.0120143	-0.418643	4.19276	0.3125	0.286	0.3335	0.2915	0.3305	0.297	0.3265	0.893606	8704878	0.0401822	0.0141881	1.30735	5.50429	0.037183	0.021086	0.076493	0.022975	0.06796	0.0254	0.059045	0.697592	191890	0.0591459	0.0293348	1.488	6.46887	0.052622	0.0211332	0.134317	0.02468	0.116713	0.029268	0.0979672	0.697592	191890	0.229161
HC227	Cc	HC227_Cc_20	100	0.0276909	0.0553664	0	7329	1	9	0.186111	0.00474854	0.571274	1.9781	0.1845	0.1807	0.1937	0.1809	0.1934	0.1813	0.1928	-1	1	1	NA	NA	NA	1	1	1	1	1	1	1	-1	1	1	NA	NA	NA	1	1	1	1	1	1	1	-1	1	1
HC227	Cc	HC227_Cc_21	85.4789	94.5453	89.7838	16.9879	2456023	1	4692	0.247649	0.0247542	-0.420955	3.71199	0.25	0.193	0.289863	0.203	0.2835	0.215	0.2765	0.944889	1702935	0.123351	0.083636	1.54583	5.58707	0.090039	0.040379	0.338668	0.044661	0.291376	0.050362	0.245221	0.863041	46665	0.0889008	0.0688042	1.47002	4.71703	0.060565	0.0210982	0.267934	0.02484	0.235352	0.0299112	0.196328	0.863041	46665	0.203457
HC227	Cc	HC227_Cc_22	49.6343	77.9071	60.637	101.474	5065501	1	8807	0.144105	0.0155484	-0.148879	3.43993	0.1445	0.1125	0.172925	0.118	0.1685	0.124	0.1635	0.63847	2823876	0.0294962	0.019508	1.87032	8.58992	0.025293	0.007906	0.081155	0.009053	0.064158	0.01069	0.052004	0.448525	72771	0.121055	0.079895	1.20271	3.9833	0.093618	0.0303855	0.320715	0.0359985	0.284498	0.043734	0.241246	0.448525	72771	0.202577
HC227	Cc	HC227_Cc_23	98.7681	89.7861	94.0632	1.24722	4328850	1	8457	0.188302	0.0161908	0.190581	3.76011	0.188	0.1565	0.221	0.162	0.215	0.1685	0.2085	0.985997	7010640	0.0501519	0.0242165	3.18859	23.8148	0.044493	0.023586	0.108547	0.025924	0.092467	0.028954	0.077085	0.955656	230181	0.0969752	0.0481443	1.48128	6.12801	0.08594	0.0350165	0.223364	0.040884	0.193342	0.048337	0.160642	0.955656	230181	0.243618
HC227	Cc	HC227_Cc_24	71.3104	16.9079	27.3346	40.232	970682	1	1629	0.18754	0.0175627	0.151804	4.93014	0.1885	0.1517	0.2195	0.1582	0.2135	0.165	0.208	0.549681	41616	0.0611972	0.0309337	1.14778	4.91094	0.055772	0.019806	0.138759	0.0233632	0.119367	0.027719	0.10173	0.264962	561	0.166233	0.0734679	0.561424	3.47639	0.16188	0.041332	0.326862	0.053383	0.293245	0.072669	0.260611	0.264962	561	0.229104
HC227	Cc	HC227_Cc_25	31.9416	91.2632	47.321	213.072	8025919	1	15210	0.18806	0.016663	0.113535	3.43827	0.188	0.1555	0.222	0.161	0.2155	0.1675	0.209	0.919013	16655106	0.0704745	0.0367351	1.99849	8.73184	0.061541	0.027736	0.173333	0.031369	0.144108	0.036324	0.115049	0.778794	463203	0.25549	0.121988	0.446701	2.58468	0.244486	0.068947	0.510411	0.0840121	0.468521	0.105483	0.421489	0.778794	463203	0.296937
HC227	Cc	HC227_Cc_26	98.8672	86.7235	92.3981	1.14576	3781209	1	7034	0.169987	0.0127814	0.0961789	3.02079	0.17	0.1455	0.1955	0.1495	0.191	0.154	0.1865	0.903623	2715615	0.033926	0.0174815	4.55027	44.5806	0.029859	0.016176	0.07261	0.01771	0.0624873	0.019699	0.052289	0.689426	52003	0.105989	0.0483004	1.22108	5.20013	0.096137	0.0398963	0.226742	0.0461392	0.199555	0.0544	0.170739	0.689426	52003	0.234793
HC227	Cc	HC227_Cc_27	99.6513	90.8443	95.0443	0.349872	6414422	1	12375	0.338243	0.0185456	-1.45875	8.91044	0.34	0.295	0.3675	0.30685	0.364	0.317	0.3585	0.987482	12824580	0.0263772	0.0205348	6.32411	66.2903	0.021325	0.011309	0.072913	0.01244	0.056318	0.013901	0.041613	0.906291	354061	0.0337984	0.0192249	2.29031	11.1988	0.029249	0.011789	0.0869055	0.013726	0.069807	0.016337	0.055467	0.906291	354061	0.12717
HC227	Cc	HC227_Cc_28	98.3017	77.1689	86.4627	1.72762	3658515	1	6409	0.280762	0.0199691	-0.782598	4.2887	0.283	0.2325	0.3145	0.244	0.3095	0.2545	0.3035	0.708382	926841	0.0659222	0.0358556	2.43678	11.3711	0.056156	0.028548	0.170556	0.031767	0.135549	0.035804	0.106668	0.345389	8515	0.0272843	0.014717	1.64623	6.66661	0.023684	0.00934565	0.0673612	0.0110482	0.0568561	0.0130364	0.0465296	0.345389	8515	0.162361
HC227	Cc	HC227_Cc_29	50.9562	98.6233	67.1946	96.247	8517550	1	16838	0.192007	0.0184463	-0.298903	3.53858	0.193	0.152	0.2255	0.1595	0.22	0.1685	0.214	0.998621	31422628	0.0910976	0.0423798	1.09825	5.56886	0.086013	0.03126	0.188738	0.035523	0.166244	0.041893	0.144936	0.989039	1134771	0.22511	0.0970962	0.329813	2.68728	0.220668	0.062098	0.423279	0.0777905	0.390418	0.100322	0.354058	0.989039	1134771	0.265295
HC227	Cc	HC227_Cc_2	20.541	98.0077	33.9637	386.83	16755639	1	32967	0.307487	0.0233648	-0.79188	5.44333	0.3085	0.2525	0.3495	0.267	0.343	0.2805	0.3355	0.98884	115527600	0.0868324	0.0579815	3.19812	18.7553	0.073887	0.025313	0.246939	0.031277	0.185308	0.03902	0.140997	0.966451	4119885	0.113319	0.0531653	0.716819	3.81307	0.107661	0.029373	0.231892	0.037302	0.20815	0.049047	0.183466	0.966451	4119885	0.277996
HC227	Cc	HC227_Cc_30	97.4997	95.1028	96.2863	2.56438	4868333	1	9589	0.210624	0.0179492	-0.55082	3.53526	0.2125	0.1705	0.24115	0.1785	0.237	0.187	0.232	0.994626	9823528	0.0731612	0.0347152	2.55097	13.6016	0.064735	0.034704	0.1638	0.038157	0.134473	0.04256	0.111445	0.967414	344865	0.0836423	0.0472139	2.36236	11.5861	0.072524	0.029924	0.212538	0.034822	0.170143	0.041225	0.136116	0.967414	344865	0.214789
HC227	Cc	HC227_Cc_31	49.6247	71.8778	58.7134	101.513	7080443	1	12908	0.183657	0.0135101	-0.17306	3.33006	0.184	0.1555	0.2095	0.161	0.205	0.1665	0.2005	0.763262	8952796	0.0490985	0.0234793	2.61275	14.9582	0.043679	0.02291	0.110664	0.025188	0.0910332	0.028146	0.074608	0.586586	263175	0.0909996	0.0550376	1.75126	7.32461	0.075161	0.0283053	0.235867	0.0331077	0.199277	0.039515	0.163349	0.586586	263175	0.273481
HC227	Cc	HC227_Cc_32	24.4078	83.3057	37.7541	309.704	20291495	1	39968	0.293368	0.0282896	-1.07173	5.23807	0.297	0.2235	0.338	0.2415	0.332	0.258	0.3245	0.997594	170247378	0.083159	0.0840466	3.77383	19.6739	0.059843	0.022921	0.369049	0.026761	0.233392	0.032103	0.139661	0.983892	5973696	0.0499278	0.0284194	2.80824	22.5114	0.04422	0.0156	0.116215	0.018571	0.098271	0.022647	0.082308	0.983892	5973696	0.183904
HC227	Cc	HC227_Cc_33	27.9578	98.3972	43.5435	257.682	19339705	1	36812	0.315425	0.0229588	-0.49811	3.53308	0.317	0.2655	0.3555	0.275	0.35	0.285	0.3435	0.941188	99355656	0.0540522	0.038975	3.93434	32.3646	0.043965	0.015923	0.152977	0.019312	0.121842	0.023716	0.093977	0.787605	2683086	0.104005	0.0512509	1.20711	5.92399	0.096548	0.030187	0.225162	0.036741	0.196666	0.046213	0.16914	0.787605	2683086	0.27624
HC227	Cc	HC227_Cc_34	30.2212	97.8452	46.1792	230.894	18349904	1	36116	0.226811	0.0144867	-0.712583	4.67265	0.228	0.1945	0.2515	0.2015	0.248	0.209	0.244	0.993323	138203625	0.145628	0.0486892	1.20522	5.39399	0.136799	0.076533	0.26607	0.08373	0.238202	0.093013	0.209542	0.972101	4881250	0.121559	0.0593255	0.998934	4.29931	0.11062	0.03839	0.261901	0.045581	0.23364	0.055453	0.20293	0.972101	4881250	0.303275
HC227	Cc	HC227_Cc_35	31.5229	93.4806	47.1472	217.229	13430016	1	26708	0.285025	0.0240938	-1.14012	5.6031	0.2885	0.223	0.3235	0.24	0.3175	0.2555	0.311	0.999341	84207753	0.158932	0.100106	1.88509	7.61911	0.13471	0.046652	0.449863	0.054833	0.364351	0.065888	0.279936	0.997501	3219453	0.123563	0.0718701	0.74464	3.59664	0.117419	0.02447	0.278264	0.03009	0.248325	0.038448	0.21791	0.997501	3219453	0.301085
HC227	Cc	HC227_Cc_36	89.764	48.8757	63.2904	11.4033	2205492	1	3422	0.322861	0.0195347	-1.019	6.43002	0.3255	0.2795	0.354737	0.288	0.35	0.2985	0.345	0.329976	47278	0.0584504	0.0433288	1.71513	6.2431	0.043407	0.0146916	0.176218	0.0172337	0.149133	0.0206237	0.122024	0.0910532	190	0.061484	0.0431643	0.915157	3.26147	0.051353	0.0106117	0.158876	0.0135511	0.139548	0.0162271	0.1226	0.0910532	190	0.216996
HC227	Cc	HC227_Cc_37	25.6342	94.6622	40.3435	290.104	11339360	1	20687	0.280787	0.0261267	-0.0573854	3.89223	0.281	0.2255	0.3365	0.23565	0.3255	0.2485	0.3125	0.776729	24489501	0.189343	0.0948224	1.44446	6.08705	0.169836	0.064429	0.437984	0.0745	0.377445	0.08968	0.312363	0.626451	715806	0.2077	0.0979073	0.237314	2.72076	0.210913	0.0450471	0.405307	0.055346	0.369907	0.071919	0.331705	0.626451	715806	0.324245
HC227	Cc	HC227_Cc_38	53.06	61.5103	56.9735	88.4658	5981278	1	10424	0.288021	0.0186284	-0.524852	4.75427	0.2885	0.249	0.3205	0.258	0.316	0.2655	0.311	0.64065	3777126	0.0981578	0.0643173	3.15991	20.7216	0.083824	0.032881	0.251314	0.036909	0.206833	0.042585	0.16693	0.429681	93096	0.07882	0.0520126	1.7431	6.94892	0.0632395	0.0216734	0.217109	0.0255145	0.182555	0.0309955	0.14984	0.429681	93096	0.273078
HC227	Cc	HC227_Cc_39	98.0277	93.0664	95.4826	2.01202	3154892	1	6159	0.200444	0.0144671	0.0499672	3.67109	0.2005	0.172	0.228525	0.177	0.2235	0.182	0.2185	0.981595	3777126	0.0542037	0.0218524	3.06844	20.4812	0.049513	0.029331	0.105959	0.03184	0.091017	0.034966	0.077402	0.949084	126253	0.0607936	0.0291933	2.05458	10.884	0.055318	0.0233426	0.134329	0.026984	0.112317	0.031844	0.0940154	0.949084	126253	0.267612
HC227	Cc	HC227_Cc_3	16.1931	12.5752	14.1567	517.546	5061359	1	7472	0.331977	0.020208	-0.263006	3.22359	0.333	0.2885	0.369113	0.297275	0.3635	0.306	0.357	0.216234	130305	0.0920538	0.0473031	1.27632	5.11997	0.082796	0.0266174	0.219106	0.0337264	0.189933	0.0426204	0.153542	0.0680161	946	0.158832	0.0790368	0.682406	4.06843	0.156713	0.0263151	0.331201	0.0387388	0.295671	0.0582605	0.260116	0.0680161	946	0.283406
HC227	Cc	HC227_Cc_40	99.8799	99.4324	99.6557	0.120241	3201580	1	6350	0.274242	0.0232758	-1.42948	6.99853	0.278	0.218	0.308	0.2315	0.304	0.2465	0.2985	0.997315	4643628	0.113651	0.0941869	2.80191	12.0465	0.081561	0.040091	0.418365	0.044292	0.31714	0.049803	0.216275	0.994349	175528	0.0500943	0.0356586	2.94776	15.7317	0.0402	0.0157805	0.150579	0.0184444	0.11656	0.0219607	0.0882503	0.994349	175528	0.227114
HC227	Cc	HC227_Cc_41	96.6575	61.4929	75.1658	3.45808	3582680	1	6014	0.346297	0.0181344	-1.13145	6.29894	0.3485	0.3045	0.3755	0.314	0.3715	0.324	0.3665	0.553689	458403	0.0261711	0.0146521	2.08012	8.64005	0.022152	0.010462	0.0694339	0.011703	0.0571659	0.0133312	0.043881	0.227477	3240	0.0546939	0.0262133	1.11516	4.6258	0.049659	0.018366	0.119938	0.0218691	0.106209	0.0260356	0.0897114	0.227477	3240	0.138855
HC227	Cc	HC227_Cc_42	97.4757	98.2159	97.8444	2.5897	8198727	1	15943	0.295124	0.0158551	-0.486429	3.68342	0.2965	0.259	0.323	0.266	0.3185	0.2745	0.3135	0.986	23615628	0.0744122	0.0475901	2.25597	9.77898	0.057856	0.029756	0.207152	0.03255	0.170915	0.036225	0.136634	0.939128	737505	0.0607453	0.0371423	2.02288	8.73937	0.050489	0.0196146	0.163469	0.0228852	0.133596	0.0272874	0.107438	0.939128	737505	0.237019
HC227	Cc	HC227_Cc_43	29.9494	92.1205	45.2029	233.896	15346869	1	30018	0.346832	0.017406	-0.503655	5.24154	0.347	0.313	0.3795	0.319925	0.374	0.326	0.3685	0.989027	89465376	0.0352941	0.0190708	1.79368	11.076	0.030905	0.011537	0.080984	0.013288	0.071285	0.015834	0.060737	0.955201	2973141	0.0910122	0.0498891	0.772323	3.25689	0.081524	0.021267	0.202199	0.025914	0.184737	0.033066	0.163647	0.955201	2965830	0.175624
HC227	Cc	HC227_Cc_44	53.5364	81.1413	64.5098	86.7888	4879074	1	9527	0.261664	0.0356681	-0.272819	2.29582	0.263	0.192075	0.317	0.20365	0.3115	0.216	0.305	0.975255	8881005	0.205134	0.146709	0.424314	1.91465	0.182408	0.030939	0.495045	0.035901	0.45168	0.043757	0.40492	0.930299	297606	0.118219	0.066184	0.491898	2.71857	0.114926	0.0246851	0.252661	0.029817	0.23002	0.037505	0.205938	0.930299	297606	0.285232
HC227	Cc	HC227_Cc_45	98.4485	89.9233	93.993	1.57599	2669279	1	5277	0.278881	0.0235276	-1.63299	7.99959	0.283	0.22	0.31205	0.2365	0.3075	0.2503	0.303	0.994547	3096316	0.0822879	0.0676618	3.43211	18.6994	0.060221	0.0305959	0.275931	0.033618	0.205756	0.037576	0.14888	0.986155	113526	0.0360843	0.0334517	3.93443	24.4105	0.0265675	0.01031	0.133163	0.012047	0.094789	0.0144205	0.065633	0.986155	113526	0.18272
HC227	Cc	HC227_Cc_46	22.3893	94.0715	36.17	346.642	18869627	1	36274	0.208886	0.0203793	-0.320807	3.61804	0.21	0.1645	0.246	0.174	0.24	0.183	0.2335	0.936256	113198581	0.121932	0.0541213	1.42276	7.68244	0.113625	0.044216	0.253627	0.051779	0.221483	0.06247	0.18969	0.839105	3624778	0.139661	0.0640531	0.765975	4.38381	0.134285	0.0343114	0.282774	0.044599	0.25185	0.061015	0.221162	0.839105	3624778	0.310226
HC227	Cc	HC227_Cc_47	23.131	98.0132	37.4289	332.319	15214350	1	29994	0.184681	0.0174795	-0.106568	3.16161	0.185	0.149	0.218	0.1555	0.213	0.1625	0.207	0.99659	96486886	0.0667901	0.036128	1.62409	8.47071	0.057625	0.023553	0.153774	0.026472	0.134794	0.030542	0.114969	0.982916	3423036	0.225795	0.110164	0.793037	3.35154	0.207252	0.0621659	0.487284	0.077456	0.442111	0.098946	0.383782	0.982916	3423036	0.293596
HC227	Cc	HC227_Cc_48	19.8127	45.8716	27.673	404.727	8662263	1	15441	0.228117	0.0182912	-0.202951	3.20283	0.2285	0.191	0.2625	0.1975	0.2575	0.205	0.251	0.764597	7787431	0.123978	0.0468514	1.52746	6.66688	0.113545	0.063487	0.245711	0.069372	0.215167	0.076841	0.184681	0.473567	111628	0.0587025	0.0288721	1.79068	9.3319	0.0529475	0.0211357	0.129545	0.0247367	0.111457	0.029438	0.0943013	0.473567	111628	0.283271
HC227	Cc	HC227_Cc_49	28.1414	98.6367	43.7896	255.348	13922363	1	27465	0.32146	0.0240265	-0.608287	3.05466	0.326	0.2698	0.3595	0.2775	0.3545	0.2865	0.349	0.99701	81670590	0.0585105	0.0409319	2.04707	11.3698	0.045563	0.015479	0.15946	0.017832	0.135718	0.021175	0.111262	0.981876	2905255	0.0492338	0.0251802	1.39133	6.73337	0.045091	0.014344	0.110335	0.017338	0.095067	0.021716	0.080738	0.981876	2905255	0.229875
HC227	Cc	HC227_Cc_4	11.1956	82.5986	19.7186	793.204	54978963	1	108633	0.308627	0.0195392	-0.341833	3.75574	0.3095	0.2675	0.345	0.2755	0.339	0.2835	0.3325	0.995437	1303434153	0.0684122	0.0369071	2.31404	16.8454	0.061573	0.023608	0.152869	0.026882	0.131247	0.031347	0.112017	0.978042	47370511	0.106642	0.0606439	1.18526	4.40781	0.091362	0.029672	0.259696	0.035601	0.228828	0.043808	0.193182	0.978042	47370511	0.256107
HC227	Cc	HC227_Cc_50	99.9385	94.2763	97.0249	0.0615381	3066654	1	5876	0.335465	0.0179674	-0.811923	6.80626	0.336	0.299	0.3675	0.3065	0.3625	0.3145	0.357	0.964438	2678455	0.0288224	0.0170783	4.45769	39.3795	0.024556	0.012731	0.069955	0.014071	0.057587	0.015787	0.045458	0.867769	72010	0.0799058	0.0365996	1.16113	4.84176	0.072564	0.0293282	0.171021	0.0341824	0.151111	0.040555	0.12969	0.867769	72010	0.121225
HC227	Cc	HC227_Cc_51	18.2907	0.259185	0.511127	446.725	71568	1	113	0.303473	0.0352772	-0.773466	4.06764	0.308	0.2061	0.3622	0.2464	0.3555	0.26	0.3469	0.47415	66	0.0941938	0.109671	1.17919	3.05296	0.024999	0.00380075	0.319612	0.0048305	0.312702	0.007275	0.304421	0.158437	0	NA	NA	NA	NA	NA	NA	NA	NA	NA	NA	NA	0.158437	0	NA
HC227	Cc	HC227_Cc_52	46.8558	97.8875	63.3756	113.421	9305896	1	18243	0.251625	0.0249676	-0.810905	4.64923	0.254	0.19	0.2935	0.205	0.2875	0.221	0.28	0.977571	34175778	0.140495	0.0751485	1.90337	8.13055	0.123305	0.051203	0.354454	0.058584	0.292656	0.06885	0.231355	0.946936	1191196	0.0437331	0.0325312	3.21473	23.4882	0.0382	0.009188	0.118386	0.011051	0.0955992	0.013793	0.076914	0.946936	1191196	0.209831
HC227	Cc	HC227_Cc_53	12.8231	0.737904	1.3955	679.844	413224	1	648	0.32826	0.0356954	-0.91916	3.66595	0.335	0.238088	0.378412	0.257675	0.375	0.27835	0.36715	0.384859	2346	0.198386	0.18266	1.07307	2.77059	0.12882	0.00691287	0.602813	0.0162425	0.575604	0.0274645	0.5392	0.133465	10	0.252296	0.145051	0.161143	2.16465	0.240025	0.0426161	0.477474	0.0630583	0.466976	0.103943	0.44598	0.133465	10	0.306864
HC227	Cc	HC227_Cc_54	23.6898	96.6088	38.0494	322.123	13472389	1	26492	0.23532	0.0230801	-0.24713	4.21338	0.2355	0.1835	0.2815	0.1965	0.273	0.208	0.2635	0.98846	74218836	0.237552	0.100567	0.895906	3.96977	0.222258	0.086905	0.480363	0.100988	0.429726	0.122109	0.37357	0.967867	2618616	0.208905	0.0941587	0.318736	2.59918	0.204817	0.053141	0.401987	0.06585	0.37092	0.085637	0.334966	0.967867	2618616	0.329295
HC227	Cc	HC227_Cc_55	100	1.05061	2.07938	0	73924	1	129	0.348333	0.00897682	-0.166542	3.52626	0.347	0.3328	0.3649	0.3359	0.3638	0.3379	0.3606	0.745103	406	0.016751	0.0128578	0.93896	2.58842	0.0110565	0.00153163	0.0448431	0.002174	0.0421118	0.004443	0.038182	0.377942	3	0.0118517	0.0073592	-0.385737	1.5	0.013476	0.004299	0.0180236	0.004782	0.0177843	0.005748	0.0173056	0.377942	3	0.0263493
HC227	Cc	HC227_Cc_56	14.6264	84.5857	24.9402	583.694	35960615	1	69608	0.266156	0.0259828	-0.827606	4.39616	0.2695	0.2025	0.3095	0.217	0.303	0.2325	0.295	0.972332	429201051	0.142655	0.0868173	2.15011	8.67006	0.11651	0.053986	0.402649	0.060967	0.32808	0.069929	0.250188	0.897201	13155885	0.0639543	0.0305231	1.76115	9.65607	0.058602	0.022132	0.138779	0.026509	0.118882	0.032278	0.100689	0.897201	13155885	0.219304
HC227	Cc	HC227_Cc_57	54.8496	93.9959	69.275	82.3166	3955201	1	7679	0.199986	0.0191198	-0.262029	3.30548	0.2005	0.1605	0.235	0.168	0.23	0.176	0.224	0.97269	5420278	0.0675647	0.0365819	1.05402	4.33382	0.060092	0.022676	0.153317	0.025123	0.135117	0.028552	0.116976	0.91119	174936	0.142208	0.0725313	0.4564	2.67371	0.137231	0.0329668	0.293993	0.0400407	0.268102	0.050889	0.240008	0.91119	174936	0.237654
HC227	Cc	HC227_Cc_58	50.6519	98.9446	67.0033	97.4262	3568683	1	6965	0.178075	0.0219851	0.440904	3.42653	0.1765	0.1395	0.2235	0.145	0.2155	0.1515	0.207	0.977815	4750903	0.0477766	0.0282295	1.87861	10.1213	0.041625	0.014614	0.114639	0.016619	0.098287	0.019534	0.083018	0.95335	161028	0.100631	0.0682633	0.463317	2.18017	0.0940295	0.016469	0.233229	0.019465	0.214516	0.023886	0.193525	0.95335	161028	0.168652
HC227	Cc	HC227_Cc_59	51.9582	65.5896	57.9835	92.4622	5100505	1	10065	0.340219	0.0155551	-0.318356	3.7503	0.3405	0.3085	0.3695	0.315	0.365	0.3205	0.3595	0.997083	10967586	0.0382282	0.0180937	1.86291	12.8976	0.036132	0.014042	0.077449	0.015868	0.067901	0.018431	0.059452	0.986517	388521	0.0543348	0.0260717	1.21171	5.59467	0.050209	0.017273	0.117791	0.020669	0.102582	0.025422	0.087644	0.986517	386760	0.159296
HC227	Cc	HC227_Cc_5	55.6922	0.15047	0.300129	79.5583	9513	1	15	0.191267	0.0264318	1.71236	4.76362	0.1845	0.165625	0.25375	0.16825	0.252	0.1711	0.2271	0.556922	0	NA	NA	NA	NA	NA	NA	NA	NA	NA	NA	NA	-1	1	1	NA	NA	NA	1	1	1	1	1	1	1	-1	1	1
HC227	Cc	HC227_Cc_60	57.355	9.08679	15.6881	74.3528	390043	1	703	0.224199	0.0302931	-0.00894273	2.4698	0.225	0.165775	0.2815	0.1755	0.27445	0.183	0.2634	0.812269	21321	0.228374	0.138559	0.926745	3.36205	0.199059	0.046545	0.568245	0.063111	0.509365	0.080583	0.436612	0.53119	378	0.144922	0.0807308	0.413576	2.5247	0.144076	0.0231442	0.323478	0.0298949	0.302979	0.0419198	0.25411	0.53119	378	0.203564
HC227	Cc	HC227_Cc_61	59.3877	0.202753	0.404127	68.385	16463	1	26	0.276481	0.00293422	0.629008	3.67119	0.2765	0.272	0.282313	0.272	0.281	0.2725	0.28025	0.363178	0	NA	NA	NA	NA	NA	NA	NA	NA	NA	NA	NA	-1	1	1	NA	NA	NA	1	1	1	1	1	1	1	-1	1	1
HC227	Cc	HC227_Cc_62	48.358	98.7639	64.9261	106.791	7308180	1	14246	0.21467	0.0218409	-0.419939	3.27603	0.2165	0.166	0.253	0.1745	0.2475	0.1855	0.241	0.975841	19534375	0.0992708	0.0463371	1.79506	8.55825	0.088742	0.042246	0.219214	0.047219	0.188194	0.053782	0.157581	0.924269	652653	0.0490286	0.0288126	1.56338	7.18112	0.043374	0.012915	0.121526	0.015378	0.103193	0.019041	0.0853958	0.924269	652653	0.260766
HC227	Cc	HC227_Cc_63	25.7201	2.56138	4.6588	288.801	377499	1	723	0.289589	0.0223887	-0.548261	3.26676	0.291	0.237	0.325975	0.2456	0.3225	0.2605	0.3174	0.962596	39903	0.135924	0.0773428	1.31073	5.28271	0.115986	0.0279204	0.333285	0.044492	0.285523	0.060296	0.240885	0.820951	990	0.160413	0.0814515	0.511365	2.60946	0.1457	0.0322548	0.327881	0.0454138	0.300308	0.0641886	0.278842	0.820951	990	0.233618
HC227	Cc	HC227_Cc_64	28.9462	68.3455	40.6682	245.469	19298318	1	36904	0.333669	0.0237836	-0.450544	3.21365	0.335	0.285	0.3735	0.2925	0.3685	0.3015	0.363	0.955353	104712156	0.0633371	0.044172	4.30342	44.0496	0.054583	0.016208	0.1522	0.019375	0.129862	0.023826	0.109848	0.803618	2864421	0.122299	0.0663786	0.715602	3.21693	0.112062	0.028004	0.269549	0.034387	0.244025	0.0441	0.214972	0.803618	2862028	0.24355
HC227	Cc	HC227_Cc_65	99.8626	97.8418	98.8419	0.137603	2712964	1	5207	0.316327	0.0170233	-0.430911	5.5202	0.3165	0.282	0.3485	0.2895	0.3425	0.296	0.3365	0.967342	2216565	0.0404829	0.0286105	4.86645	36.9183	0.033694	0.01774	0.113461	0.019559	0.081044	0.021892	0.0606306	0.887888	61776	0.0454155	0.0280947	2.91022	16.271	0.0384	0.0163037	0.124577	0.018912	0.0984938	0.02215	0.0739565	0.887888	61776	0.165356
HC227	Cc	HC227_Cc_66	65.292	0.136323	0.272078	53.1581	24588	1	34	0.343853	0.00917798	0.12794	3.72065	0.34425	0.32615	0.361162	0.3278	0.3582	0.3317	0.3517	0.34708	6	0.00651583	0.00505219	0.631158	2.00736	0.0048655	0.00139562	0.0140521	0.00165625	0.0135362	0.0021775	0.0125045	-1	1	1	NA	NA	NA	1	1	1	1	1	1	1	-1	1	1
HC227	Cc	HC227_Cc_67	100	90.3323	94.9206	0	6055266	1	11855	0.368554	0.0170613	-0.372473	3.89192	0.3695	0.3335	0.399	0.3395	0.3945	0.3465	0.3895	0.997776	14037051	0.0169191	0.00994592	3.23526	26.8425	0.014214	0.006734	0.042752	0.007524	0.035557	0.008569	0.028585	0.972899	455535	0.0293955	0.0170604	2.21538	11.4006	0.02543	0.009505	0.073887	0.011178	0.0602893	0.013419	0.0491356	0.972899	438516	0.121116
HC227	Cc	HC227_Cc_68	12.1888	25.8833	16.5731	720.428	14313503	1	21855	0.340178	0.0171322	-0.781621	4.92031	0.3415	0.3015	0.3695	0.31	0.365	0.319	0.36	0.273568	1186570	0.0280016	0.0210974	1.79012	6.12251	0.020296	0.007982	0.0877166	0.009074	0.0757266	0.010559	0.059682	0.0589615	3828	0.0630851	0.0341494	1.07415	4.18651	0.055822	0.0174815	0.148518	0.0212434	0.130771	0.0263903	0.110548	0.0589615	3828	0.217238
HC227	Cc	HC227_Cc_69	57.5738	99.2053	72.8621	73.69	7630903	1	15063	0.301977	0.0261523	-0.985423	5.22733	0.305	0.238	0.3445	0.254	0.3385	0.269	0.3315	0.992776	24770241	0.0953038	0.0697786	2.67616	13.9527	0.078524	0.025073	0.293712	0.029038	0.227657	0.034994	0.170136	0.979438	903840	0.089593	0.0571039	0.764049	3.38417	0.083141	0.016743	0.213745	0.020136	0.188647	0.0251999	0.164448	0.979438	903840	0.283717
HC227	Cc	HC227_Cc_6	42.6447	91.1761	58.1102	134.496	10328397	1	20253	0.205636	0.0209296	0.00421602	3.0614	0.2055	0.1645	0.2465	0.1715	0.2405	0.179	0.2325	0.99333	41683015	0.0965781	0.0480702	1.5256	7.61153	0.088503	0.033852	0.214822	0.038378	0.185408	0.04501	0.156591	0.962981	1412040	0.130347	0.0737577	0.436248	2.65594	0.128303	0.024057	0.28281	0.029127	0.254791	0.037025	0.22649	0.962981	1412040	0.266697
HC227	Cc	HC227_Cc_70	52.8317	54.3198	53.5655	89.2802	9640575	1	15105	0.359999	0.0164946	-0.513107	4.30445	0.361	0.327	0.3895	0.3325	0.385	0.339	0.38	0.319087	830116	0.0324921	0.0167113	1.19772	4.96456	0.028784	0.01041	0.07362	0.012081	0.064772	0.0145775	0.055307	0.085163	4371	0.115015	0.0523332	0.424465	2.91606	0.111837	0.0279865	0.227276	0.0354235	0.208746	0.047357	0.187156	0.085163	4005	0.182328
HC227	Cc	HC227_Cc_71	98.6259	88.4164	93.2425	1.39322	6069888	1	11901	0.335807	0.0214615	-2.03385	10.8928	0.339	0.283	0.365	0.2995	0.362	0.3125	0.357	0.994744	14372841	0.0333323	0.0438037	7.72766	79.4683	0.02365	0.011073	0.111765	0.012336	0.074643	0.014026	0.052108	0.967026	480690	0.0564036	0.0400572	2.89352	15.5905	0.0456	0.0172292	0.171455	0.0201624	0.131893	0.024137	0.098095	0.967026	474825	0.134959
HC227	Cc	HC227_Cc_72	47.1715	58.3051	52.1507	111.993	10269358	1	16489	0.326274	0.0140751	-0.425246	4.00524	0.327	0.296	0.352	0.3025	0.348	0.309	0.3435	0.422663	1957231	0.0353236	0.01709	2.27587	10.5582	0.031601	0.015544	0.0871843	0.017365	0.0666235	0.019763	0.053007	0.138909	11781	0.0853129	0.041645	1.35012	6.64987	0.078549	0.027331	0.18316	0.03277	0.158806	0.039941	0.137118	0.138909	11781	0.218963
HC227	Cc	HC227_Cc_73	3.37301	0.194488	0.36777	2864.71	186925	1	258	0.258926	0.0319926	-1.30166	6.66323	0.262	0.16985	0.313787	0.209825	0.30015	0.22535	0.2898	0.0309108	0	NA	NA	NA	NA	NA	NA	NA	NA	NA	NA	NA	-1	1	1	NA	NA	NA	1	1	1	1	1	1	1	-1	1	1
HC227	Cc	HC227_Cc_74	99.5781	90.4127	94.7743	0.423724	3441756	1	6733	0.321379	0.0232972	-1.32045	7.20828	0.3245	0.2655	0.35785	0.28	0.3525	0.2935	0.347	0.98916	4510506	0.0428978	0.0500518	4.81174	32.8723	0.028361	0.012541	0.180253	0.014051	0.119448	0.016093	0.077245	0.958612	149331	0.0505204	0.0276993	1.60651	6.73108	0.043693	0.016636	0.124782	0.019495	0.106066	0.023295	0.086932	0.958612	149331	0.144812
HC227	Cc	HC227_Cc_75	18.9106	93.7086	31.4704	428.805	30826939	1	59542	0.331132	0.0217056	-1.02023	5.31777	0.334	0.278	0.366	0.291	0.361	0.304	0.3555	0.954219	311238775	0.0418719	0.0416648	5.95883	55.6238	0.031365	0.013883	0.141695	0.015771	0.101325	0.018285	0.069746	0.874699	9792525	0.0638811	0.0368534	2.16776	12.2091	0.056184	0.018852	0.156212	0.022636	0.130306	0.027926	0.1072	0.874699	9792525	0.163923
HC227	Cc	HC227_Cc_76	41.8081	0.0685165	0.136809	139.188	7754	1	10	0.26145	0.00506869	-0.20096	2.15901	0.2625	0.25345	0.268663	0.2539	0.268325	0.2548	0.26765	-1	1	1	NA	NA	NA	1	1	1	1	1	1	1	-1	1	1	NA	NA	NA	1	1	1	1	1	1	1	-1	1	1
HC227	Cc	HC227_Cc_77	83.316	10.0453	17.9289	20.025	1422142	1	1933	0.318349	0.0224094	-0.369893	3.7595	0.32	0.267	0.3595	0.2775	0.352	0.29	0.344	0.0704374	703	0.0771868	0.0310555	-0.13103	3.06137	0.079901	0.00830315	0.13887	0.0187742	0.125859	0.0339214	0.1148	0.0106698	1	0.031135	NA	NA	NA	0.031135	0.031135	0.031135	0.031135	0.031135	0.031135	0.031135	0.0106698	1	0.076461
HC227	Cc	HC227_Cc_78	97.8757	76.0223	85.5758	2.17044	6480815	1	11884	0.363445	0.0163416	-0.43132	3.35995	0.3645	0.3285	0.392	0.335	0.388	0.3415	0.3835	0.887413	6098778	0.0220244	0.0119249	1.89369	8.39089	0.01879	0.008651	0.054731	0.009658	0.046448	0.011008	0.03751	0.57671	87153	0.0650909	0.0333757	1.29829	5.38333	0.058073	0.0207008	0.149446	0.0245876	0.130932	0.0299372	0.109944	0.57671	83436	0.14519
HC227	Cc	HC227_Cc_79	98.5494	77.2094	86.5839	1.47199	2753482	1	5071	0.291276	0.0219802	-0.824394	4.03306	0.295	0.2395	0.3255	0.25	0.3215	0.2615	0.316	0.871425	1263255	0.086364	0.0561276	1.96032	8.58115	0.06835	0.029014	0.240223	0.032397	0.196332	0.03695	0.158274	0.658057	24753	0.0640655	0.0350062	1.82959	7.65353	0.054884	0.0226914	0.159615	0.0264268	0.134368	0.0312516	0.108919	0.658057	24753	0.229463
HC227	Cc	HC227_Cc_7	93.2552	69.0964	79.3783	7.23264	2480499	1	4049	0.315429	0.0125622	-0.843319	6.8867	0.316	0.2895	0.3375	0.2955	0.334	0.301	0.3305	0.468525	118828	0.0381886	0.0189517	3.34007	20.8307	0.0337595	0.01871	0.0848889	0.0206504	0.0695729	0.0229247	0.0562432	0.144008	595	0.0522839	0.0295572	1.16519	4.65658	0.044053	0.013533	0.117921	0.0172491	0.108463	0.0221952	0.0926454	0.144008	595	0.196375
HC227	Cc	HC227_Cc_80	50.9388	98.5359	67.1592	96.3139	9037115	1	17845	0.242589	0.0221817	-1.1407	5.22235	0.246	0.1845	0.277	0.2	0.272	0.2145	0.2665	0.994078	34857075	0.135789	0.0706443	1.52707	6.15261	0.120247	0.045597	0.32835	0.05228	0.279169	0.062913	0.227435	0.977755	1261666	0.0692838	0.0430513	1.45754	7.37098	0.064408	0.012933	0.172155	0.015845	0.143431	0.020672	0.120008	0.977755	1261666	0.248941
HC227	Cc	HC227_Cc_81	99.535	97.6821	98.5998	0.467174	5632242	1	11141	0.321634	0.0218729	-1.35866	7.97261	0.324	0.273	0.356	0.285	0.352	0.2955	0.3455	0.992579	13962970	0.0525756	0.0548693	6.86589	65.7668	0.040787	0.017553	0.149863	0.019708	0.109076	0.022681	0.082497	0.986907	515620	0.0702756	0.0443754	2.23996	11.368	0.058635	0.021286	0.188762	0.0250089	0.156501	0.030125	0.124425	0.986907	515620	0.216589
HC227	Cc	HC227_Cc_82	21.9668	1.99005	3.64948	355.233	246650	1	401	0.24064	0.0442781	-0.298759	2.50032	0.2485	0.1545	0.319	0.1605	0.309	0.169	0.2925	0.532325	3828	0.221433	0.155689	0.588642	2.40175	0.188398	0.0180656	0.535548	0.0287382	0.492698	0.0442211	0.44675	0.362254	78	0.112348	0.0991618	0.664967	1.84277	0.072715	0.00977778	0.286647	0.0140444	0.284866	0.0192502	0.267827	0.362254	78	0.253497
HC227	Cc	HC227_Cc_83	29.639	95.0253	45.1846	237.394	8774527	1	14886	0.174572	0.02327	0.57589	3.98533	0.173	0.133563	0.2265	0.14	0.215	0.1465	0.204	0.565757	6699630	0.0660595	0.0579533	4.08617	30.655	0.049578	0.017709	0.205671	0.020093	0.165544	0.023549	0.122527	0.430101	175528	0.211406	0.151483	0.880852	2.76809	0.156565	0.0409739	0.559418	0.0485417	0.513169	0.059479	0.444935	0.430101	175528	0.267433
HC227	Cc	HC227_Cc_84	100	27.7236	43.4119	0	898757	1	1228	0.333762	0.0224624	-1.21899	5.71014	0.3365	0.275838	0.368163	0.291675	0.364	0.308	0.3585	0.0218402	15	0.0703672	0.0510061	0.181651	1.51604	0.069232	0.010686	0.143383	0.010854	0.138529	0.0111604	0.132538	-1	1	1	NA	NA	NA	1	1	1	1	1	1	1	-1	1	1
HC227	Cc	HC227_Cc_85	99.8396	87.7652	93.4139	0.160629	3629078	1	7124	0.334901	0.0220192	-0.983099	5.2097	0.338	0.282037	0.3715	0.2945	0.3655	0.307	0.359	0.99467	5247180	0.0296683	0.0215383	4.29797	34.5561	0.023826	0.011144	0.085202	0.012456	0.065687	0.014181	0.049706	0.973435	182106	0.0360652	0.0248576	2.55827	12.4754	0.029502	0.01064	0.108631	0.012496	0.0838138	0.015044	0.062812	0.973435	182106	0.171527
HC227	Cc	HC227_Cc_86	100	0.316646	0.631294	0	14757	1	24	0.310542	0.00586981	-0.0562866	2.82628	0.31	0.299513	0.320775	0.3016	0.31935	0.305	0.3179	0.343634	0	NA	NA	NA	NA	NA	NA	NA	NA	NA	NA	NA	-1	1	1	NA	NA	NA	1	1	1	1	1	1	1	-1	1	1
HC227	Cc	HC227_Cc_87	58.6919	72.3433	64.8065	70.3813	7754706	1	13728	0.337661	0.0188593	-0.827588	5.86847	0.3385	0.296588	0.371	0.3065	0.366	0.3155	0.3595	0.72297	6147771	0.0333902	0.0193052	2.65249	16.1437	0.02948	0.011438	0.08298	0.013091	0.067452	0.01544	0.054121	0.451394	110215	0.0511058	0.0312724	1.28312	5.03219	0.043255	0.0132417	0.128911	0.015756	0.111886	0.0191144	0.0940502	0.451394	109746	0.138609
HC227	Cc	HC227_Cc_88	100	0.0722876	0.144471	0	4131	1	5	0.2695	0.00540833	0.455854	1.98197	0.27	0.2641	0.27685	0.2642	0.2762	0.2644	0.2749	-1	1	1	NA	NA	NA	1	1	1	1	1	1	1	-1	1	1	NA	NA	NA	1	1	1	1	1	1	1	-1	1	1
HC227	Cc	HC227_Cc_89	100	98.2589	99.1218	0	3050199	1	6042	0.279466	0.0178266	-0.662683	4.94707	0.281	0.2395	0.311	0.2475	0.3055	0.2575	0.3	0.991934	4160170	0.0791039	0.0520979	2.3451	9.85126	0.061631	0.0314952	0.229191	0.034667	0.191961	0.03881	0.148009	0.976537	153735	0.0496083	0.0468784	3.44691	16.9956	0.035744	0.0145474	0.2157	0.0169337	0.133651	0.0200274	0.0898332	0.976537	153735	0.271976
HC227	Cc	HC227_Cc_8	100	0.0631837	0.126288	0	2054	1	3	0.3105	0.0108282	-0.705411	1.5	0.3165	0.298925	0.316975	0.29985	0.31695	0.3017	0.3169	-1	1	1	NA	NA	NA	1	1	1	1	1	1	1	-1	1	1	NA	NA	NA	1	1	1	1	1	1	1	-1	1	1
HC227	Cc	HC227_Cc_90	75.4037	0.295868	0.589423	32.6194	11022	1	18	0.213361	0.0121435	0.544356	2.94495	0.21175	0.19535	0.237737	0.1962	0.234975	0.1979	0.2284	0.56487	1	0.001996	NA	NA	NA	0.001996	0.001996	0.001996	0.001996	0.001996	0.001996	0.001996	-1	1	1	NA	NA	NA	1	1	1	1	1	1	1	-1	1	1
HC227	Cc	HC227_Cc_91	53.1302	80.6707	64.0661	88.2169	5467499	1	10784	0.210526	0.0184389	-0.141008	3.63713	0.2105	0.173	0.2455	0.1805	0.24	0.188	0.2335	0.995569	12627825	0.0751758	0.0351152	2.40029	15.97	0.067521	0.033417	0.163012	0.036909	0.139578	0.041624	0.116965	0.983783	451725	0.133645	0.0631336	1.19257	5.48521	0.123228	0.0449901	0.284508	0.0529912	0.249097	0.0638794	0.215017	0.983783	451725	0.187148
HC227	Cc	HC227_Cc_92	99.615	84.1633	91.2396	0.386505	2783771	1	4798	0.360862	0.0176255	-0.0261021	2.86305	0.361	0.3275	0.395	0.3325	0.3895	0.338	0.384	0.670891	476776	0.0178625	0.0105649	1.61875	6.25262	0.014931	0.005862	0.04667	0.006697	0.039568	0.007829	0.032067	0.342203	4753	0.04283	0.0204246	1.34673	5.98497	0.038818	0.0147764	0.09396	0.0176198	0.0808304	0.0210064	0.0695972	0.342203	4753	0.101272
HC227	Cc	HC227_Cc_93	98.8853	95.6253	97.228	1.1273	6444703	1	12583	0.230457	0.0184698	-0.681358	3.67509	0.2325	0.186	0.261	0.1955	0.2565	0.206	0.2515	0.990803	15415128	0.112414	0.0521438	2.4597	11.9568	0.098212	0.057743	0.259567	0.062391	0.214476	0.068318	0.172306	0.957814	499500	0.0423585	0.0490298	6.92299	67.9278	0.030836	0.012815	0.153515	0.014843	0.11228	0.017487	0.0689061	0.957814	499500	0.149395
HC227	Cc	HC227_Cc_94	48.255	95.066	64.0159	107.233	4936499	1	9687	0.26028	0.0210906	-0.985274	5.32097	0.2625	0.2085	0.295	0.2215	0.2895	0.234	0.2835	0.979964	9854580	0.177245	0.0762764	1.4899	5.96128	0.159743	0.080128	0.38318	0.089145	0.331537	0.100889	0.27706	0.941737	349866	0.121315	0.059842	1.52496	7.54339	0.11127	0.0393364	0.266921	0.0469518	0.22808	0.057296	0.194271	0.941737	349866	0.277681
HC227	Cc	HC227_Cc_95	100	96.2532	98.0908	0	3603660	1	6935	0.317476	0.019377	-1.35163	7.80731	0.3195	0.272675	0.3485	0.2845	0.344	0.295	0.3385	0.96806	4042746	0.0535982	0.0429557	4.79154	34.262	0.042774	0.021546	0.160285	0.023892	0.11297	0.026929	0.083526	0.901361	118828	0.0490657	0.0296505	1.99961	8.29836	0.0411105	0.0161597	0.135	0.018804	0.110673	0.0224437	0.0856799	0.901361	118828	0.158903
HC227	Cc	HC227_Cc_96	100	95.1165	97.4971	0	6755771	1	13408	0.289726	0.0125331	-0.182134	3.65563	0.29	0.265	0.3135	0.2695	0.31	0.274	0.3055	0.998273	20804475	0.0525169	0.0271775	2.56009	14.2181	0.044722	0.024124	0.122834	0.026376	0.103322	0.029292	0.08516	0.993218	781875	0.0433382	0.0292282	1.94774	7.57464	0.034216	0.013051	0.126217	0.015235	0.106275	0.018146	0.0832632	0.993218	781875	0.234066
HC227	Cc	HC227_Cc_97	86.4283	92.6354	89.4243	15.7029	1880852	1	3554	0.147755	0.0169795	0.0573645	2.9475	0.1475	0.115	0.1815	0.1195	0.1765	0.126	0.17	0.925057	861328	0.0233606	0.0192408	2.33614	9.22693	0.016435	0.00711	0.081491	0.007952	0.066635	0.009091	0.048195	0.794703	22578	0.0808181	0.0691594	2.96329	12.2709	0.061501	0.0239164	0.341866	0.0278617	0.264524	0.0332884	0.129764	0.794703	22578	0.168324
HC227	Cc	HC227_Cc_98	99.6148	94.4115	96.9434	0.386678	5216142	1	10142	0.338405	0.0170782	-1.552	7.95664	0.3405	0.2945	0.364	0.309	0.3605	0.3195	0.356	0.982068	9498261	0.025708	0.0205658	4.11841	28.0176	0.019804	0.009845	0.082347	0.010891	0.061266	0.012263	0.043951	0.929222	293761	0.0351408	0.022415	2.72658	13.9984	0.029458	0.011787	0.097667	0.013705	0.074402	0.016278	0.058682	0.929222	293761	0.174719
HC227	Cc	HC227_Cc_99	65.8095	95.1845	77.8171	51.9536	9597778	1	18842	0.240036	0.0203025	-0.786039	4.30735	0.242	0.1905	0.274	0.201	0.269	0.2145	0.263	0.99298	36881166	0.163291	0.0696156	1.2825	5.56496	0.151799	0.071471	0.339385	0.078514	0.29558	0.088163	0.252079	0.960565	1268028	0.167976	0.103511	0.392117	1.97173	0.150243	0.034463	0.364794	0.040746	0.338274	0.04955	0.308421	0.960565	1268028	0.280752
HC227	Cc	HC227_Cc_9	100	0.0851933	0.170242	0	2359	1	3	0.349167	0.010681	-0.62265	1.5	0.3535	0.337825	0.356825	0.33865	0.35665	0.3403	0.3563	-1	1	1	NA	NA	NA	1	1	1	1	1	1	1	-1	1	1	NA	NA	NA	1	1	1	1	1	1	1	-1	1	1
HC227	Ccc	HC227_Ccc_0	15.6524	82.6023	26.3178	538.88	32815518	1	63371	0.265102	0.0258529	-0.82364	4.40878	0.2685	0.202	0.3085	0.216	0.3015	0.2315	0.294	0.966579	347807125	0.142798	0.0859815	2.11613	8.51698	0.11693	0.054015	0.39805	0.061142	0.326236	0.070249	0.250626	0.883896	10554715	0.063715	0.0306687	1.79764	9.99682	0.058359	0.021735	0.13859	0.026127	0.118682	0.031939	0.10048	0.883896	10554715	0.216035
HC227	Ccc	HC227_Ccc_100	91.2795	3.85503	7.39764	9.55362	1291846	1	1727	0.317463	0.0225992	-0.463569	3.57662	0.3195	0.266	0.358	0.2758	0.351	0.2885	0.343	0.0459281	105	0.0735372	0.0332027	-0.0111197	2.86916	0.075132	0.0067956	0.145337	0.016641	0.116549	0.0284978	0.109787	-1	1	1	NA	NA	NA	1	1	1	1	1	1	1	-1	1	1
HC227	Ccc	HC227_Ccc_101	13.4609	14.2489	13.8437	642.891	8579250	1	12917	0.34204	0.0159599	-0.549594	4.15471	0.343	0.3065	0.3705	0.3145	0.366	0.3225	0.361	0.223934	216153	0.016946	0.00946539	3.25788	21.0653	0.014745	0.0070328	0.0404322	0.007891	0.0331308	0.009037	0.026612	0.0245676	190	0.0424639	0.0163234	0.86491	3.59472	0.0400445	0.0183466	0.0796659	0.0205476	0.0754042	0.0235779	0.064716	0.0245676	190	0.144468
HC227	Ccc	HC227_Ccc_102	52.9073	99.5023	69.0822	89.0099	8730337	1	17158	0.315755	0.0187879	-0.623769	4.19246	0.318	0.2755	0.347	0.2845	0.3425	0.292	0.3375	0.972435	31375081	0.0678506	0.0469208	4.69631	45.5733	0.062635	0.020307	0.152294	0.022576	0.126776	0.025892	0.109394	0.942139	1140805	0.118138	0.0731082	0.695283	2.82343	0.103778	0.025137	0.2755	0.029968	0.249904	0.036833	0.22095	0.942139	1140805	0.24601
HC227	Ccc	HC227_Ccc_103	98.771	83.6105	90.5607	1.24427	4011069	1	6977	0.21104	0.0138009	-0.0401799	3.67606	0.2115	0.1835	0.237	0.1884	0.233	0.1935	0.228	0.706417	1092981	0.0837581	0.0358593	1.99437	8.52949	0.074578	0.042834	0.186715	0.046517	0.154637	0.05121	0.12711	0.329018	10585	0.0704274	0.0376526	2.16364	9.79345	0.061909	0.0260356	0.179929	0.0301104	0.140472	0.035822	0.11095	0.329018	10585	0.240381
HC227	Ccc	HC227_Ccc_104	100	27.7977	43.5027	0	901160	1	1231	0.333638	0.0226015	-1.21927	5.6531	0.3365	0.27425	0.368125	0.2905	0.364	0.3075	0.3585	0.0217819	15	0.0703672	0.0510061	0.181651	1.51604	0.069232	0.010686	0.143383	0.010854	0.138529	0.0111604	0.132538	-1	1	1	NA	NA	NA	1	1	1	1	1	1	1	-1	1	1
HC227	Ccc	HC227_Ccc_105	46.7742	98.7639	63.4831	113.793	7555632	1	14710	0.214361	0.0222769	-0.425966	3.25467	0.2165	0.1645	0.253	0.1735	0.2475	0.184	0.241	0.972708	20662806	0.102786	0.049766	1.72394	7.74063	0.090802	0.042438	0.232996	0.047513	0.200219	0.054239	0.167112	0.917892	688551	0.0531584	0.0354857	2.04345	9.60793	0.045068	0.013078	0.148233	0.015612	0.121598	0.019399	0.095397	0.917892	688551	0.263893
HC227	Ccc	HC227_Ccc_106	62.1836	0.141395	0.282148	60.814	9835	1	13	0.183769	0.0084917	-1.1854	3.90814	0.1845	0.1657	0.19355	0.1684	0.1931	0.1737	0.1919	-1	1	1	NA	NA	NA	1	1	1	1	1	1	1	-1	1	1	NA	NA	NA	1	1	1	1	1	1	1	-1	1	1
HC227	Ccc	HC227_Ccc_107	59.3363	97.4323	73.7555	68.531	5911030	1	11433	0.361863	0.016506	-0.654839	4.82968	0.363	0.327	0.391	0.3335	0.3865	0.341	0.3815	0.985952	11503206	0.032197	0.0198295	0.795302	3.397	0.029488	0.008222	0.075173	0.009245	0.066204	0.010686	0.058058	0.909326	334153	0.0813239	0.0524341	0.658021	2.82928	0.070997	0.015062	0.188737	0.0181786	0.171869	0.022739	0.153431	0.909326	184528	0.171277
HC227	Ccc	HC227_Ccc_108	98.3991	87.4262	92.5887	1.62694	3248928	1	6356	0.321907	0.0160811	-0.762038	5.30715	0.323	0.287	0.35	0.295	0.346	0.3025	0.3405	0.993412	3994551	0.0330207	0.0173267	2.60546	13.0288	0.028454	0.015053	0.082074	0.01656	0.065663	0.018507	0.051884	0.968718	129286	0.0455607	0.0259407	1.73324	6.9192	0.0389145	0.0150881	0.119124	0.0175655	0.09893	0.0209305	0.0785435	0.968718	129286	0.170814
HC227	Ccc	HC227_Ccc_109	38.8546	0.882428	1.72566	157.37	143758	1	259	0.21132	0.031557	0.186124	2.76812	0.2085	0.152	0.272825	0.1555	0.26615	0.1693	0.2521	0.793486	3828	0.143345	0.104876	0.759443	3.39939	0.13802	0.013582	0.36015	0.0237741	0.304957	0.0319605	0.269231	0.631283	120	0.180123	0.140718	0.0698872	1.20001	0.183803	0.0149161	0.392597	0.0193646	0.362459	0.0251029	0.3435	0.631283	120	0.261682
HC227	Ccc	HC227_Ccc_10	69.4535	9.01863	15.9643	43.9812	319683	1	585	0.223175	0.0290336	-0.148375	2.49359	0.225	0.1651	0.2772	0.1721	0.27	0.183	0.2598	0.848944	16836	0.217172	0.127873	0.851796	3.15966	0.192357	0.0452239	0.529843	0.0615593	0.472593	0.078102	0.40904	0.587579	325	0.137951	0.0830752	0.61164	2.67395	0.131998	0.0213184	0.325356	0.0291806	0.306302	0.0396048	0.25953	0.587579	325	0.187709
HC227	Ccc	HC227_Ccc_110	100	93.5158	96.6493	0	2158333	1	4140	0.208745	0.0172488	-0.575643	4.10802	0.21	0.17	0.2385	0.179	0.2345	0.1875	0.2295	0.960697	1373653	0.0415626	0.0188726	2.14128	10.5712	0.036586	0.020382	0.0926037	0.022218	0.078949	0.024553	0.06487	0.85973	39340	0.0632889	0.0296115	1.52552	6.98645	0.0572235	0.0238159	0.13747	0.0278179	0.119084	0.03267	0.10085	0.85973	39340	0.132227
HC227	Ccc	HC227_Ccc_111	83.1215	15.6053	26.2773	20.3059	1399050	1	2600	0.242481	0.017611	0.0766798	3.75302	0.2425	0.207	0.275512	0.2145	0.2705	0.2205	0.265	0.888281	401856	0.14502	0.0627714	1.03862	3.81399	0.126744	0.066708	0.295385	0.0731968	0.267488	0.081143	0.236065	0.721192	9591	0.140885	0.0852862	1.03192	3.32193	0.111837	0.0398633	0.342736	0.0471305	0.311813	0.056489	0.274546	0.721192	9591	0.307971
HC227	Ccc	HC227_Ccc_112	86.0585	77.2141	81.3967	16.2	1752508	1	3018	0.253785	0.0211716	-1.02003	4.49173	0.2575	0.199212	0.2855	0.215	0.2815	0.2265	0.2765	0.660763	190036	0.112077	0.0760175	1.91053	6.85465	0.085545	0.039308	0.334062	0.043896	0.282374	0.049838	0.21878	0.356456	1830	0.0526636	0.0498919	2.73207	11.3298	0.035778	0.0125739	0.220935	0.0148906	0.169481	0.0176128	0.101684	0.356456	1830	0.152559
HC227	Ccc	HC227_Ccc_113	22.9395	0.0643649	0.12837	335.929	22616	1	30	0.363883	0.013479	-1.78047	5.95572	0.36725	0.329288	0.377188	0.3348	0.376275	0.35005	0.37555	-1	1	1	NA	NA	NA	1	1	1	1	1	1	1	-1	1	1	NA	NA	NA	1	1	1	1	1	1	1	-1	1	1
HC227	Ccc	HC227_Ccc_114	18.7445	93.5282	31.2301	433.489	31040112	1	61333	0.317901	0.0270924	-0.895714	4.27184	0.3215	0.2515	0.36	0.267	0.355	0.2825	0.3485	0.999001	414705600	0.0660315	0.0671503	3.8249	21.3954	0.046781	0.017121	0.280774	0.01997	0.18298	0.023964	0.115725	0.989162	14985075	0.0740143	0.0427848	2.04353	10.731	0.066007	0.019808	0.183316	0.024321	0.150863	0.031043	0.123185	0.989162	14985075	0.189241
HC227	Ccc	HC227_Ccc_115	96.7145	44.3758	60.8374	3.39715	3528284	1	6769	0.339481	0.014541	-0.876974	5.75244	0.3405	0.3075	0.364	0.315	0.361	0.3215	0.3565	0.96951	3563115	0.0263661	0.0139534	2.54875	14.9656	0.022592	0.011467	0.063892	0.012684	0.054134	0.014274	0.0433716	0.870405	95703	0.0311845	0.0174086	1.82562	8.02205	0.0269	0.0104536	0.0781384	0.0122431	0.0663159	0.014646	0.0535248	0.870405	95703	0.145027
HC227	Ccc	HC227_Ccc_116	27.9096	98.3972	43.4851	258.299	19379342	1	36787	0.317956	0.0223837	-0.48485	3.59801	0.3195	0.2695	0.357	0.2785	0.352	0.289	0.3455	0.934257	96389670	0.0504721	0.0350251	4.38523	42.7934	0.042138	0.015039	0.138417	0.018335	0.109917	0.022738	0.084907	0.766857	2568511	0.100812	0.0494082	1.25063	6.44908	0.093936	0.029413	0.214785	0.03575	0.188789	0.044927	0.163152	0.766857	2568511	0.271462
HC227	Ccc	HC227_Ccc_117	60.4275	95.0472	73.883	65.4875	8656704	1	16749	0.339365	0.0196126	-1.28206	6.69291	0.3415	0.28985	0.37065	0.304	0.366	0.317	0.3605	0.979855	24587578	0.0342416	0.0257218	4.25539	34.6977	0.028581	0.010891	0.098984	0.012285	0.074839	0.0143	0.057033	0.912351	735078	0.0513103	0.0296199	1.40128	6.31686	0.045919	0.013707	0.124194	0.016285	0.105721	0.019911	0.088723	0.912351	733866	0.179285
HC227	Ccc	HC227_Ccc_118	100	0.367905	0.733114	0	11960	1	19	0.347895	0.0247715	-0.462322	2.0747	0.353	0.304975	0.379975	0.31195	0.37795	0.3159	0.3763	0.474666	0	NA	NA	NA	NA	NA	NA	NA	NA	NA	NA	NA	-1	1	1	NA	NA	NA	1	1	1	1	1	1	1	-1	1	1
HC227	Ccc	HC227_Ccc_119	34.3707	94.0375	50.3415	190.946	6859843	1	13113	0.163704	0.0148674	-0.0517895	3.18331	0.164	0.134	0.192	0.139	0.188	0.145	0.1825	0.943823	13336030	0.0346108	0.0146932	2.47143	14.8664	0.031475	0.016937	0.07085	0.018657	0.060329	0.020857	0.051247	0.826492	378015	0.173901	0.0780185	1.07534	4.65747	0.160372	0.0618303	0.365357	0.0728977	0.322539	0.087693	0.277709	0.826492	378015	0.236432
HC227	Ccc	HC227_Ccc_11	95.0424	87.9888	91.3797	5.21615	2166593	1	4033	0.178182	0.0128851	-0.184406	3.18556	0.1785	0.1514	0.202	0.156	0.198	0.1615	0.1945	0.914437	873181	0.0380148	0.0174316	3.77986	27.7817	0.034381	0.019622	0.080549	0.021457	0.06446	0.023726	0.053994	0.70581	17391	0.116815	0.0603036	1.78309	7.4263	0.103314	0.042237	0.292011	0.049426	0.236409	0.058758	0.188227	0.70581	17391	0.215786
HC227	Ccc	HC227_Ccc_120	96.2445	95.7834	96.0134	3.90206	2209866	1	4235	0.247716	0.0238198	-0.532434	3.93963	0.25	0.195	0.2895	0.2055	0.283	0.2175	0.276	0.961072	1418770	0.0996939	0.0621341	2.1262	8.68516	0.079479	0.039455	0.281398	0.043469	0.235383	0.048697	0.181655	0.876855	39060	0.0684524	0.0483215	2.10678	8.17496	0.05361	0.0204343	0.212106	0.0238698	0.177018	0.0284556	0.132929	0.876855	39060	0.17641
HC227	Ccc	HC227_Ccc_121	25.7852	14.068	18.2041	287.82	4751404	1	7205	0.336714	0.0193426	-0.997516	5.20778	0.339	0.29	0.368	0.302	0.3635	0.3125	0.3585	0.263806	144991	0.0396751	0.0230818	0.972668	3.62981	0.034345	0.010381	0.0951508	0.0122255	0.084403	0.01479	0.072615	0.0815224	903	0.0634515	0.0341745	0.950889	4.00374	0.057332	0.0130183	0.148678	0.0179726	0.12778	0.0240468	0.110491	0.0815224	903	0.242331
HC227	Ccc	HC227_Ccc_122	100	0.111636	0.223022	0	5215	1	9	0.187333	0.0324885	0.402557	1.6559	0.17	0.1502	0.235	0.1534	0.234	0.1598	0.232	1	0	NA	NA	NA	NA	NA	NA	NA	NA	NA	NA	NA	-1	1	1	NA	NA	NA	1	1	1	1	1	1	1	-1	1	1
HC227	Ccc	HC227_Ccc_123	99.5896	88.6536	93.804	0.412043	6320673	1	11735	0.312248	0.0118647	-0.456825	4.32513	0.313	0.2865	0.3335	0.292	0.3305	0.2975	0.3265	0.887362	7646005	0.0384793	0.0129616	1.37691	6.11855	0.03591	0.020807	0.071447	0.022631	0.063292	0.024953	0.055223	0.686025	166176	0.0555918	0.0267622	1.64779	7.77267	0.050088	0.02061	0.124107	0.023984	0.106392	0.028414	0.0891525	0.686025	166176	0.222808
HC227	Ccc	HC227_Ccc_124	99.7509	91.7862	95.6029	0.24977	6474462	1	12477	0.338209	0.0186727	-1.50507	9.16798	0.34	0.295	0.3675	0.3065	0.3636	0.317	0.3585	0.983945	12900660	0.0265438	0.0206969	6.18731	64.0201	0.021369	0.011315	0.074407	0.012447	0.057387	0.013911	0.042235	0.897886	354061	0.0337984	0.0192249	2.29031	11.1988	0.029249	0.011789	0.0869055	0.013726	0.069807	0.016337	0.055467	0.897886	354061	0.12717
HC227	Ccc	HC227_Ccc_125	14.2866	0.242428	0.476767	599.957	101209	1	151	0.33052	0.0192546	-0.733972	3.94525	0.3315	0.293125	0.3605	0.29875	0.357	0.3055	0.3525	0.195882	45	0.0551587	0.0712947	1.60343	4.16212	0.0208	0.0027833	0.244311	0.0034344	0.214133	0.0052748	0.179202	0.136885	0	NA	NA	NA	NA	NA	NA	NA	NA	NA	NA	NA	0.136885	0	NA
HC227	Ccc	HC227_Ccc_126	58.6837	93.1428	72.0028	70.4052	4458489	1	8798	0.188815	0.0158627	-0.29342	4.36831	0.1895	0.1545	0.217	0.1615	0.2125	0.169	0.208	0.989065	8509875	0.0641876	0.027929	1.0773	4.79976	0.060133	0.025665	0.131744	0.028685	0.116213	0.032866	0.100471	0.979894	312445	0.248786	0.120086	0.451074	2.53176	0.236786	0.0665123	0.50094	0.0801462	0.46238	0.100287	0.416022	0.979894	312445	0.271291
HC227	Ccc	HC227_Ccc_12	51.6054	91.6313	66.0259	93.7783	5651820	1	10828	0.21565	0.023642	0.108711	3.04388	0.2145	0.1705	0.263	0.177675	0.256	0.186	0.2465	0.95323	9337681	0.0950811	0.0544069	1.6839	6.94682	0.0805	0.03183	0.239537	0.036163	0.203805	0.042612	0.167342	0.849066	259560	0.0511881	0.0312263	1.87876	8.12622	0.044202	0.014674	0.139049	0.017332	0.111815	0.021113	0.0881742	0.849066	259560	0.216777
HC227	Ccc	HC227_Ccc_13	99.9524	93.2855	96.504	0.0475868	7156651	1	13554	0.271061	0.0260289	-0.494145	3.77137	0.2735	0.211	0.3165	0.2235	0.3095	0.2375	0.3015	0.930149	12920986	0.116134	0.0857939	2.32897	9.28199	0.086022	0.040754	0.378745	0.045313	0.305588	0.051265	0.224522	0.816815	336610	0.049038	0.0319215	3.23727	20.3302	0.041178	0.016622	0.134624	0.019336	0.10545	0.022904	0.081371	0.816815	336610	0.230707
HC227	Ccc	HC227_Ccc_14	99.5047	84.5929	91.4448	0.49781	2801081	1	4824	0.360743	0.0176887	-0.0294718	2.85635	0.361	0.327	0.395	0.3325	0.3895	0.338	0.384	0.666745	476776	0.0178625	0.0105649	1.61875	6.25262	0.014931	0.005862	0.04667	0.006697	0.039568	0.007829	0.032067	0.340088	4753	0.04283	0.0204246	1.34673	5.98497	0.038818	0.0147764	0.09396	0.0176198	0.0808304	0.0210064	0.0695972	0.340088	4753	0.101272
HC227	Ccc	HC227_Ccc_15	74.9346	78.0295	76.4507	33.4497	3360497	1	5397	0.146557	0.0143922	-0.0165524	3.24044	0.1465	0.1175	0.1735	0.123	0.1695	0.128	0.1645	0.442656	261726	0.0293083	0.0181312	2.02522	7.96009	0.023609	0.011049	0.0819716	0.012339	0.068677	0.014022	0.053153	0.163175	1953	0.118556	0.0511972	0.967567	4.12333	0.109873	0.0444856	0.244623	0.051337	0.216761	0.0620636	0.189431	0.163175	1953	0.231983
HC227	Ccc	HC227_Ccc_16	41.237	92.6665	57.0752	142.501	18368552	1	31757	0.35233	0.0176967	-0.573509	4.35849	0.3535	0.3145	0.3835	0.3225	0.379	0.33	0.374	0.656643	25536231	0.0300104	0.0161873	3.4369	28.0072	0.026762	0.011774	0.069119	0.013316	0.057051	0.015457	0.046799	0.402048	372816	0.0888853	0.0482127	0.599402	2.8733	0.083071	0.0205824	0.192493	0.0249457	0.174968	0.0313895	0.155364	0.402048	371091	0.161183
HC227	Ccc	HC227_Ccc_17	23.5154	2.02527	3.72935	325.254	194830	1	307	0.184612	0.0300231	0.993865	4.52597	0.182	0.140325	0.269025	0.145	0.235	0.1503	0.2189	0.346671	820	0.0551843	0.0301986	0.255456	2.33875	0.0542165	0.0064038	0.117582	0.00786395	0.107593	0.0152994	0.0952871	0.287256	15	0.16762	0.0978551	-0.577476	1.71425	0.213957	0.0138154	0.274706	0.0166249	0.267343	0.0199842	0.255804	0.287256	15	0.274742
HC227	Ccc	HC227_Ccc_18	97.2404	70.1695	81.5162	2.83791	2415785	1	3922	0.315602	0.0123254	-0.863514	7.40944	0.316	0.291	0.3375	0.2965	0.334	0.3015	0.3305	0.453174	103740	0.0360188	0.0181281	4.06674	27.5268	0.032247	0.0184109	0.0800313	0.020297	0.0615663	0.0224689	0.0503151	0.134267	496	0.0441565	0.0226469	1.29371	5.91325	0.0392825	0.0126554	0.0980524	0.016834	0.0880853	0.020474	0.0774235	0.134267	496	0.182537
HC227	Ccc	HC227_Ccc_19	99.655	88.5223	93.7593	0.346244	7411693	1	13353	0.362921	0.0166006	-0.539351	3.93103	0.364	0.3275	0.3915	0.3345	0.3875	0.341	0.383	0.812975	6655776	0.02274	0.0128323	2.12293	10.5383	0.019196	0.008721	0.056502	0.009745	0.048165	0.011124	0.039204	0.522372	96141	0.06476	0.0310358	1.08351	4.76924	0.059085	0.021012	0.139525	0.025023	0.12326	0.030426	0.106509	0.522372	92665	0.148184
HC227	Ccc	HC227_Ccc_1	68.5266	92.2997	78.6561	45.9286	4742450	1	8692	0.162884	0.0147213	0.0967557	3.03332	0.1625	0.1345	0.192362	0.139	0.1875	0.1445	0.182	0.859654	3499335	0.0398351	0.0250558	2.68505	14.9339	0.034168	0.013366	0.101804	0.015035	0.081912	0.017434	0.066661	0.599859	62835	0.151227	0.0889036	0.882358	3.13131	0.127138	0.0392629	0.357618	0.0468004	0.322479	0.0566664	0.282949	0.599859	62835	0.247833
HC227	Ccc	HC227_Ccc_20	39.4118	98.5915	56.3127	153.731	11686853	1	23035	0.238146	0.0235164	-0.96797	4.53224	0.2415	0.1775	0.2755	0.1925	0.27	0.2085	0.264	0.993413	56993826	0.15368	0.075034	1.19126	4.80009	0.1383	0.049656	0.346045	0.058477	0.302729	0.07279	0.255444	0.977125	2035153	0.0910907	0.0528929	0.988286	4.98412	0.085249	0.014798	0.212214	0.018841	0.184889	0.026465	0.158512	0.977125	2035153	0.264338
HC227	Ccc	HC227_Ccc_21	99.7823	91.8439	95.6487	0.218196	3950466	1	7735	0.355389	0.0160333	-0.708877	6.03198	0.356	0.3225	0.384	0.3295	0.3795	0.3355	0.3745	0.984719	6018715	0.0196805	0.0105011	2.67139	13.9579	0.017005	0.008657	0.0488891	0.00959	0.039154	0.010803	0.031	0.960234	205761	0.0403509	0.0215513	2.24897	11.6587	0.035594	0.014628	0.096965	0.01705	0.079601	0.020169	0.064961	0.960234	204480	0.128957
HC227	Ccc	HC227_Ccc_22	28.1094	98.6367	43.7508	255.752	13938215	1	27487	0.321475	0.0240256	-0.609516	3.05583	0.326	0.269575	0.3595	0.2775	0.3545	0.2865	0.349	0.995334	81581151	0.0585053	0.0409438	2.04673	11.3647	0.045535	0.015476	0.159481	0.017828	0.135739	0.021168	0.111278	0.979708	2902845	0.0491999	0.0251452	1.39046	6.73824	0.045069	0.014341	0.110165	0.017334	0.094947	0.02171	0.080666	0.979708	2902845	0.22985
HC227	Ccc	HC227_Ccc_23	18.6273	0.482008	0.939701	436.846	124779	1	211	0.2899	0.0399326	-1.09724	3.63639	0.3035	0.196125	0.348125	0.2015	0.341	0.22	0.3265	0.677013	630	0.249683	0.207766	0.398197	1.50738	0.134073	0.00629392	0.600729	0.0098378	0.584085	0.0162065	0.534167	0.292549	3	0.187646	0.0553487	-0.286604	1.5	0.196508	0.131806	0.235953	0.135212	0.233877	0.142022	0.229725	0.292549	3	0.30872
HC227	Ccc	HC227_Ccc_24	32.3184	2.56138	4.74657	209.421	300426	1	576	0.290023	0.0230647	-0.726705	3.3267	0.293	0.234875	0.325313	0.243375	0.3225	0.258	0.3175	0.968202	25878	0.140116	0.0832908	1.20459	4.82197	0.11934	0.0242989	0.350791	0.0334549	0.302405	0.0557943	0.252371	0.839132	630	0.157274	0.0766784	0.142888	2.02794	0.153476	0.0297668	0.294195	0.0387393	0.285211	0.0588944	0.263621	0.839132	630	0.229411
HC227	Ccc	HC227_Ccc_25	42.3072	97.9297	59.0876	136.366	10186670	1	20173	0.191225	0.0191053	-0.229874	3.51221	0.1925	0.15	0.226	0.158	0.2205	0.1665	0.214	0.998829	46056003	0.103869	0.0501889	0.89132	4.49517	0.098603	0.029337	0.219007	0.035038	0.194985	0.043426	0.169408	0.993882	1693720	0.266972	0.125866	0.189912	2.51794	0.265269	0.041021	0.517897	0.066597	0.479167	0.101098	0.433971	0.993882	1693720	0.299621
HC227	Ccc	HC227_Ccc_26	17.7867	98.1337	30.1151	462.218	19375184	1	38138	0.298697	0.0325479	-1.11651	4.48611	0.3045	0.2165	0.348	0.2295	0.3415	0.2465	0.333	0.986351	155928970	0.145227	0.144189	1.5775	4.17805	0.08001	0.027789	0.515102	0.034238	0.469007	0.042549	0.408715	0.964899	5619628	0.126903	0.0556671	0.552792	3.57166	0.123528	0.034255	0.247005	0.043094	0.223635	0.056429	0.198945	0.964899	5619628	0.301757
HC227	Ccc	HC227_Ccc_27	67.042	0.289606	0.576721	49.1602	10835	1	18	0.324556	0.0160219	-0.364569	2.89586	0.3265	0.292762	0.349013	0.295525	0.347525	0.30875	0.347	0.473466	0	NA	NA	NA	NA	NA	NA	NA	NA	NA	NA	NA	-1	1	1	NA	NA	NA	1	1	1	1	1	1	1	-1	1	1
HC227	Ccc	HC227_Ccc_28	36.9557	89.6134	52.3308	170.594	14416496	1	28373	0.284045	0.0272067	-1.09342	5.26543	0.288	0.216	0.3265	0.234	0.321	0.2495	0.314	0.992713	85379778	0.104006	0.09506	3.01918	13.2441	0.073633	0.031101	0.433054	0.035684	0.30738	0.041817	0.193453	0.981361	2995128	0.0483042	0.0275323	3.07158	24.6461	0.042469	0.0164792	0.118103	0.019313	0.0965547	0.023117	0.0782643	0.981361	2995128	0.192618
HC227	Ccc	HC227_Ccc_29	42.3051	89.0008	57.3498	136.378	9257715	1	17848	0.321194	0.0170236	-0.925728	5.67315	0.3225	0.281	0.3505	0.2915	0.3455	0.301	0.3405	0.97103	26750955	0.0452292	0.0282034	4.32333	35.9032	0.039521	0.016968	0.110016	0.019163	0.087794	0.022291	0.070422	0.880645	778128	0.057739	0.032566	1.09763	4.52397	0.0518335	0.013674	0.13829	0.01673	0.120534	0.021475	0.101843	0.880645	778128	0.210532
HC227	Ccc	HC227_Ccc_2	100	0.0851933	0.170242	0	2359	1	3	0.349167	0.010681	-0.62265	1.5	0.3535	0.337825	0.356825	0.33865	0.35665	0.3403	0.3563	-1	1	1	NA	NA	NA	1	1	1	1	1	1	1	-1	1	1	NA	NA	NA	1	1	1	1	1	1	1	-1	1	1
HC227	Ccc	HC227_Ccc_30	43.1527	99.8974	60.2704	131.735	10252079	1	20274	0.300484	0.0251046	-0.975766	5.39863	0.303	0.24	0.3425	0.2545	0.336	0.2695	0.3285	0.993869	45682461	0.0999862	0.0661565	2.6513	13.9349	0.085069	0.027974	0.290756	0.03294	0.225083	0.040783	0.168764	0.984609	1684530	0.0969601	0.0550778	0.724311	3.8094	0.093604	0.018517	0.216245	0.022618	0.191412	0.029138	0.167654	0.984609	1684530	0.287584
HC227	Ccc	HC227_Ccc_31	12.0428	98.7211	21.467	730.369	51606569	1	102027	0.309737	0.019491	-0.382635	3.81052	0.311	0.268	0.346	0.2765	0.34	0.285	0.333	0.997524	1154905830	0.0672762	0.0377635	2.3261	16.603	0.059082	0.023006	0.153774	0.026154	0.132063	0.030368	0.11262	0.983942	41975703	0.105117	0.0623444	1.23189	4.40518	0.087644	0.028814	0.263764	0.034488	0.232775	0.0423	0.19602	0.983942	41975703	0.251754
HC227	Ccc	HC227_Ccc_32	20.0374	101.519	33.4688	399.067	10173580	1	18445	0.288207	0.0267663	-0.461661	3.7547	0.2905	0.2275	0.3375	0.239	0.3285	0.253	0.3185	0.778668	16707090	0.147531	0.0989054	2.09849	8.8062	0.11978	0.04173	0.43434	0.0494054	0.353833	0.060625	0.268105	0.58994	419986	0.158272	0.0819752	0.707643	3.52194	0.149477	0.0319436	0.347899	0.0405493	0.310703	0.055971	0.268626	0.58994	419986	0.343254
HC227	Ccc	HC227_Ccc_33	31.6853	95.5392	47.5882	215.603	15143327	1	29753	0.207721	0.022027	0.103667	3.31636	0.2075	0.165	0.2515	0.172	0.244	0.1805	0.2355	0.994128	91875790	0.116766	0.063092	1.85009	8.7718	0.103269	0.038461	0.279312	0.044627	0.233214	0.053764	0.193044	0.971351	3156328	0.132793	0.0649359	0.413966	3.07885	0.131801	0.028052	0.268553	0.034663	0.242416	0.04557	0.215775	0.971351	3156328	0.28737
HC227	Ccc	HC227_Ccc_34	39.1159	92.6548	55.0089	155.65	11818612	1	23062	0.343307	0.0173948	-0.56705	5.47587	0.344	0.3085	0.3755	0.316	0.3705	0.323	0.3645	0.985631	51546781	0.0321264	0.0164869	2.56699	20.6937	0.029131	0.011422	0.069784	0.013063	0.060282	0.015446	0.05149	0.943519	1680861	0.0699982	0.034108	1.29952	8.10337	0.066206	0.020347	0.145348	0.024489	0.128863	0.030454	0.112519	0.943519	1679028	0.181529
HC227	Ccc	HC227_Ccc_35	65.8568	93.6921	77.3463	51.8447	9440528	1	18549	0.240469	0.0201365	-0.776287	4.43646	0.2425	0.191	0.2745	0.2025	0.2695	0.2155	0.2635	0.994411	35993370	0.162651	0.0694225	1.30142	5.65953	0.151133	0.071431	0.338711	0.078405	0.294493	0.087958	0.250815	0.965968	1242676	0.167625	0.103636	0.388891	1.95878	0.14975	0.034313	0.363906	0.04054	0.337734	0.0492615	0.308152	0.965968	1242676	0.280119
HC227	Ccc	HC227_Ccc_36	98.028	94.4944	96.2287	2.01167	2415414	1	4735	0.263633	0.0204235	-1.0603	5.37574	0.266	0.211	0.2965	0.224	0.29165	0.2385	0.286	0.982485	2333880	0.149458	0.0688083	1.86013	7.77147	0.132348	0.068397	0.3439	0.075784	0.28819	0.085284	0.234211	0.943931	81406	0.116448	0.0543221	1.22884	5.22802	0.105714	0.0416704	0.252828	0.0488413	0.221243	0.0583835	0.188753	0.943931	81406	0.269494
HC227	Ccc	HC227_Ccc_37	94.0741	98.1671	96.077	6.29918	2522824	1	4941	0.256743	0.0216792	-0.831281	5.56474	0.259	0.204	0.293	0.218	0.287	0.231	0.2805	0.961998	2584401	0.166875	0.0766874	1.66382	6.44329	0.145193	0.079072	0.377906	0.086244	0.3263	0.095462	0.270231	0.937572	93528	0.0916337	0.0624907	3.03316	14.8471	0.076643	0.0304814	0.305724	0.035728	0.193023	0.0426437	0.144763	0.937572	93528	0.235734
HC227	Ccc	HC227_Ccc_38	99.7763	99.3758	99.5756	0.224193	3203078	1	6352	0.274222	0.0233131	-1.43314	6.99655	0.278	0.2175	0.308	0.231	0.304	0.2465	0.2985	0.996849	4643628	0.113651	0.0941869	2.80191	12.0465	0.081561	0.040091	0.418365	0.044292	0.31714	0.049803	0.216275	0.993884	175528	0.0500943	0.0356586	2.94776	15.7317	0.0402	0.0157805	0.150579	0.0184444	0.11656	0.0219607	0.0882503	0.993884	175528	0.227114
HC227	Ccc	HC227_Ccc_39	99.8591	99.5905	99.7246	0.141063	3095895	1	6129	0.278985	0.018846	-0.900042	6.19911	0.2805	0.2365	0.311	0.2455	0.3055	0.257	0.3	0.990645	4255903	0.0825308	0.0621058	3.41636	21.2707	0.062345	0.031587	0.246697	0.034782	0.201834	0.038969	0.155505	0.973755	157080	0.0502595	0.0473538	3.37767	16.4447	0.036083	0.014603	0.215765	0.017011	0.13797	0.020127	0.0913201	0.973755	157080	0.273315
HC227	Ccc	HC227_Ccc_3	92.2555	97.0992	94.6154	8.39458	4623082	1	9062	0.297039	0.0239974	-1.43782	7.22946	0.3005	0.235	0.3345	0.2535	0.328	0.27	0.3215	0.995328	8366095	0.0863051	0.0871139	4.01738	21.1914	0.061972	0.029648	0.41252	0.032875	0.210764	0.037193	0.135726	0.972005	282376	0.0763585	0.0407409	1.48803	6.01838	0.066039	0.0259654	0.182645	0.030262	0.158424	0.0359935	0.131973	0.972005	282376	0.175564
HC227	Ccc	HC227_Ccc_40	97.0405	68.8144	80.5256	3.04978	3993421	1	6616	0.345532	0.0182536	-1.06013	5.89539	0.34775	0.3025	0.375	0.313	0.371	0.323	0.366	0.518303	512578	0.0275805	0.0157129	1.80368	6.83661	0.022923	0.010567	0.0721569	0.011836	0.061937	0.013523	0.049028	0.21801	3828	0.0618364	0.0335826	1.41341	5.88067	0.0542075	0.0189742	0.146517	0.0227467	0.1263	0.0275687	0.107159	0.21801	3828	0.14346
HC227	Ccc	HC227_Ccc_41	98.9829	91.7515	95.2302	1.02751	4414012	1	8625	0.188443	0.0161372	0.185254	3.73953	0.188	0.1565	0.221	0.162	0.215	0.1685	0.2085	0.98758	7301931	0.0506689	0.0242736	3.08913	22.923	0.045026	0.023687	0.108776	0.02605	0.0930805	0.029119	0.078074	0.954237	238395	0.098073	0.0485203	1.43746	5.93452	0.087009	0.0352439	0.224175	0.041157	0.194657	0.048698	0.162713	0.954237	238395	0.244229
HC227	Ccc	HC227_Ccc_42	32.4368	99.0239	48.8666	208.292	15060620	1	29787	0.238388	0.0216334	-0.110913	3.97633	0.238	0.1935	0.2805	0.2035	0.2735	0.213	0.266	0.99503	99214741	0.210192	0.0849793	0.718199	3.87617	0.203017	0.075959	0.405442	0.085876	0.364122	0.102398	0.320542	0.981077	3630165	0.195374	0.0899811	0.387944	2.86081	0.192148	0.048639	0.383845	0.059344	0.351119	0.076432	0.314534	0.981077	3630165	0.334739
HC227	Ccc	HC227_Ccc_43	38.881	95.0489	55.187	157.195	9239642	1	18353	0.225529	0.0185452	-0.550355	3.83094	0.227	0.1835	0.258	0.1925	0.253	0.202	0.2475	0.996623	39449403	0.140933	0.0555183	0.900707	4.7031	0.135495	0.054364	0.269665	0.061902	0.240184	0.07357	0.211246	0.994101	1500778	0.159446	0.0834909	0.46862	3.23372	0.15887	0.027756	0.334485	0.035221	0.303064	0.048581	0.267902	0.994101	1500778	0.312436
HC227	Ccc	HC227_Ccc_44	86.0345	95.7935	90.6521	16.2325	1953876	1	3666	0.147465	0.017229	0.0207482	2.94683	0.147	0.1135	0.1815	0.119	0.1765	0.1255	0.17	0.902614	869221	0.0235908	0.0194081	2.28201	8.88808	0.016535	0.00712	0.081601	0.007965	0.06724	0.009109	0.049375	0.765002	22578	0.0808181	0.0691594	2.96329	12.2709	0.061501	0.0239164	0.341866	0.0278617	0.264524	0.0332884	0.129764	0.765002	22578	0.168324
HC227	Ccc	HC227_Ccc_45	18.7127	96.9651	31.3713	434.395	20474249	1	40325	0.187112	0.0178777	-0.127056	3.67555	0.1875	0.15	0.22	0.157	0.2155	0.164	0.2095	0.995044	172933503	0.0748704	0.039003	2.82733	28.4283	0.068192	0.025813	0.163913	0.029513	0.142251	0.034936	0.12122	0.980117	6098778	0.241307	0.106635	0.524182	2.98123	0.230257	0.0682	0.47675	0.0852069	0.435734	0.109711	0.387638	0.980117	6098778	0.324872
HC227	Ccc	HC227_Ccc_46	99.0426	95.7201	97.353	0.966668	3281656	1	6205	0.289419	0.0225629	-1.23999	5.7256	0.2925	0.232	0.3235	0.2465	0.3195	0.2625	0.3135	0.933938	2694681	0.0654637	0.0508878	4.01173	24.8344	0.051353	0.025346	0.203733	0.028058	0.14353	0.031583	0.10749	0.816525	69751	0.0721968	0.0354319	1.71514	8.46125	0.064695	0.02645	0.16219	0.0307755	0.139024	0.036521	0.116321	0.816525	69751	0.208936
HC227	Ccc	HC227_Ccc_47	90.3146	52.491	66.3938	10.7241	2360790	1	3591	0.323222	0.0187462	-0.797344	4.67845	0.3255	0.282	0.3545	0.29	0.35	0.2995	0.345	0.281472	35245	0.0435601	0.0291858	3.04857	18.8966	0.035318	0.0141944	0.112631	0.0165232	0.0953448	0.0195346	0.0764486	0.0608254	105	0.031489	0.0173495	1.24087	4.78276	0.028627	0.0100542	0.0700956	0.0107346	0.0660578	0.014286	0.0554416	0.0608254	105	0.163095
HC227	Ccc	HC227_Ccc_48	99.5685	94.2578	96.8404	0.433364	3077444	1	5895	0.335434	0.0179984	-0.818656	6.79992	0.336	0.298675	0.3675	0.3065	0.3625	0.3145	0.357	0.963827	2687721	0.0289211	0.0171471	4.40154	38.6343	0.024597	0.012736	0.070149	0.014078	0.058061	0.015797	0.045886	0.864726	72010	0.0799058	0.0365996	1.16113	4.84176	0.072564	0.0293282	0.171021	0.0341824	0.151111	0.040555	0.12969	0.864726	72010	0.121225
HC227	Ccc	HC227_Ccc_49	97.5862	94.9227	96.236	2.47352	4854813	1	9565	0.210671	0.0179024	-0.538878	3.49707	0.2125	0.171	0.24145	0.1785	0.237	0.187	0.232	0.995545	9805806	0.0731544	0.0347175	2.55172	13.6056	0.064727	0.034702	0.163814	0.038153	0.134469	0.042555	0.111433	0.970108	344865	0.0836423	0.0472139	2.36236	11.5861	0.072524	0.029924	0.212538	0.034822	0.170143	0.041225	0.136116	0.970108	344865	0.214789
HC227	Ccc	HC227_Ccc_4	96.2514	1.05061	2.07854	3.89454	76803	1	133	0.348789	0.00922595	-0.149857	3.3452	0.3475	0.33295	0.365	0.3361	0.3642	0.338	0.3619	0.717173	406	0.016751	0.0128578	0.93896	2.58842	0.0110565	0.00153163	0.0448431	0.002174	0.0421118	0.004443	0.038182	0.363775	3	0.0118517	0.0073592	-0.385737	1.5	0.013476	0.004299	0.0180236	0.004782	0.0177843	0.005748	0.0173056	0.363775	3	0.0263493
HC227	Ccc	HC227_Ccc_50	52.4521	81.0229	63.6796	90.6503	5562364	1	10957	0.210349	0.0186063	-0.148807	3.63513	0.2105	0.172	0.24555	0.18	0.24	0.1875	0.2335	0.993096	12900660	0.0755878	0.0354574	2.37942	15.6419	0.067806	0.033478	0.164487	0.036985	0.140844	0.041727	0.117913	0.977278	458403	0.133971	0.0632328	1.18569	5.44217	0.123548	0.045094	0.285248	0.0531181	0.24978	0.064049	0.215533	0.977278	458403	0.187733
HC227	Ccc	HC227_Ccc_51	22.0814	11.7227	15.315	352.87	2565846	1	4110	0.254032	0.0290173	-0.55074	3.41374	0.2565	0.188	0.303	0.2025	0.296	0.215	0.288	0.407482	183315	0.280656	0.134027	0.608164	2.88459	0.261038	0.0757889	0.583892	0.0958164	0.538908	0.12217	0.473857	0.237626	3160	0.176497	0.0957925	0.665936	2.91097	0.161499	0.0372685	0.394306	0.0466953	0.359485	0.0629787	0.312393	0.237626	3160	0.317943
HC227	Ccc	HC227_Ccc_52	99.9573	93.3442	96.5376	0.0426992	4193905	1	8119	0.199801	0.0179363	-0.51138	3.14865	0.2015	0.16	0.23	0.1665	0.226	0.1755	0.221	0.985752	5863600	0.0777581	0.0402438	2.44246	13.0574	0.068455	0.031811	0.176766	0.035718	0.14707	0.040944	0.123163	0.929244	175528	0.0703456	0.0371326	1.81355	7.96023	0.0619105	0.0245432	0.172767	0.028832	0.142237	0.0344537	0.115555	0.929244	175528	0.200441
HC227	Ccc	HC227_Ccc_53	98.2887	73.4847	84.0958	1.74111	3654740	1	6048	0.182381	0.0127199	0.0155949	3.24725	0.1825	0.157	0.207	0.1615	0.203	0.166	0.1985	0.522929	354903	0.045407	0.0262982	2.89644	16.6016	0.037932	0.0198265	0.118534	0.0218081	0.0951419	0.024337	0.074513	0.178239	1830	0.060025	0.0281329	1.25918	5.16201	0.054541	0.0217518	0.130196	0.0252866	0.115651	0.0302275	0.0983901	0.178239	1830	0.242381
HC227	Ccc	HC227_Ccc_54	52.5395	97.9512	68.3937	90.3329	8304580	1	16388	0.252622	0.0230864	-0.87982	5.04717	0.2545	0.1975	0.2915	0.2115	0.286	0.225	0.2795	0.993917	29249776	0.128284	0.0630538	1.9844	9.52137	0.116058	0.049861	0.297873	0.056775	0.245078	0.066276	0.200466	0.979142	1044735	0.0376288	0.0229896	1.96605	14.5724	0.034194	0.008903	0.0861666	0.010651	0.075864	0.013166	0.065703	0.979142	1044735	0.202614
HC227	Ccc	HC227_Ccc_55	99.3803	82.0993	89.917	0.623553	2659399	1	5134	0.288287	0.0203475	-1.12544	5.69058	0.2915	0.2385	0.3205	0.252	0.3155	0.264	0.3105	0.964116	2250381	0.0631965	0.045675	3.74847	22.3255	0.050591	0.025047	0.185777	0.027684	0.135103	0.031153	0.103084	0.894495	66795	0.0772039	0.0354441	1.39828	5.92209	0.069971	0.0295087	0.169946	0.034088	0.146114	0.04035	0.122485	0.894495	66795	0.232877
HC227	Ccc	HC227_Ccc_56	95.841	65.5152	77.8283	4.33944	3526986	1	5642	0.28071	0.0145815	-0.535714	4.24641	0.2815	0.248	0.306	0.256	0.3025	0.263	0.2985	0.426807	196251	0.0750216	0.0370216	2.73239	14.5234	0.067009	0.034676	0.176352	0.038222	0.137194	0.04286	0.111358	0.0971909	465	0.069421	0.0423161	2.006	7.80795	0.059586	0.0226438	0.205908	0.0250472	0.169241	0.0297426	0.11521	0.0971909	465	0.255165
HC227	Ccc	HC227_Ccc_57	96.7348	76.1975	85.2466	3.37544	4955678	1	8221	0.333717	0.0169135	-1.20728	7.29895	0.3355	0.295	0.362	0.305	0.3575	0.314	0.3525	0.536579	753378	0.0302583	0.0205301	3.42826	19.1515	0.024466	0.012584	0.0907376	0.013932	0.06538	0.015652	0.049761	0.179988	4371	0.0339699	0.0222	1.8451	6.87171	0.027347	0.0101495	0.100299	0.0118105	0.082278	0.014248	0.06268	0.179988	4371	0.122234
HC227	Ccc	HC227_Ccc_58	84.7961	88.0385	86.3869	17.93	5263675	1	9944	0.203675	0.0186822	-0.0130372	3.61432	0.2045	0.166	0.2375	0.172	0.2325	0.179	0.226	0.905598	7006896	0.0898925	0.0405771	2.71768	20.4492	0.081046	0.0409524	0.185001	0.0456597	0.161072	0.0516445	0.13787	0.780011	194376	0.169086	0.0770399	0.825538	3.54443	0.155873	0.0570284	0.349645	0.0672688	0.315396	0.081162	0.276492	0.780011	194376	0.267147
HC227	Ccc	HC227_Ccc_59	100	96.8642	98.4071	0	3626533	1	6978	0.317459	0.0192048	-1.31218	7.74117	0.319	0.273	0.3485	0.285	0.344	0.295	0.3385	0.967172	4096953	0.0532202	0.040289	4.9638	38.894	0.043068	0.021586	0.143227	0.023941	0.110598	0.026997	0.084954	0.900894	120786	0.049896	0.0304739	1.9483	7.92078	0.041519	0.0162066	0.137462	0.018876	0.114239	0.0225405	0.088701	0.900894	120786	0.161308
HC227	Ccc	HC227_Ccc_5	99.3675	99.0105	99.1886	0.636574	5718463	1	11310	0.321441	0.0221214	-1.41563	8.4	0.324	0.273	0.356	0.2845	0.352	0.295	0.3455	0.991708	14367480	0.0538934	0.0569656	6.56223	59.6937	0.041461	0.01763	0.15897	0.019811	0.112888	0.022827	0.084467	0.988024	528906	0.0717832	0.0456384	2.14586	10.4681	0.059574	0.021407	0.194166	0.025164	0.161912	0.030343	0.128681	0.988024	528906	0.217182
HC227	Ccc	HC227_Ccc_60	99.9235	79.2796	88.4125	0.076567	2674214	1	5237	0.209557	0.0205218	-0.713439	3.44051	0.2125	0.16095	0.2425	0.169	0.238	0.1805	0.233	0.991339	2778903	0.095151	0.0419882	1.60528	6.61095	0.084399	0.043645	0.206964	0.0487921	0.180187	0.054896	0.15127	0.969179	94395	0.0656168	0.0473421	2.55127	13.0562	0.051959	0.0178837	0.192541	0.0212624	0.157792	0.0259034	0.122034	0.969179	94395	0.212622
HC227	Ccc	HC227_Ccc_61	39.6737	98.9616	56.6403	152.056	14137402	1	27723	0.225742	0.0148078	-0.714448	4.64136	0.227	0.1925	0.251	0.2	0.2475	0.207	0.243	0.989863	78243795	0.139803	0.0468536	1.32223	5.82496	0.130542	0.075294	0.257967	0.081998	0.229911	0.09052	0.201146	0.963021	2685403	0.0969017	0.0463293	1.47833	7.26292	0.088193	0.034063	0.210771	0.039981	0.182914	0.047915	0.155822	0.963021	2685403	0.286435
HC227	Ccc	HC227_Ccc_62	99.7095	87.8217	93.3888	0.291346	3636150	1	7135	0.334915	0.0220138	-0.983235	5.21127	0.338	0.282175	0.3715	0.2945	0.3655	0.307	0.359	0.992735	5247180	0.0296683	0.0215383	4.29797	34.5561	0.023826	0.011144	0.085202	0.012456	0.065687	0.014181	0.049706	0.971542	182106	0.0360652	0.0248576	2.55827	12.4754	0.029502	0.01064	0.108631	0.012496	0.0838138	0.015044	0.062812	0.971542	182106	0.171527
HC227	Ccc	HC227_Ccc_63	99.0488	94.1303	96.5269	0.960309	1782323	1	3402	0.167267	0.0158029	0.0916765	3.04621	0.167	0.1375	0.1985	0.141525	0.1935	0.1475	0.188	0.954257	883785	0.0258388	0.0116659	1.58318	6.61904	0.022803	0.011699	0.0563824	0.012949	0.049073	0.014535	0.041454	0.902339	24531	0.0525994	0.0424203	2.64836	11.9482	0.038946	0.0157823	0.172686	0.0182605	0.146773	0.021646	0.108139	0.902339	24531	0.160666
HC227	Ccc	HC227_Ccc_64	46.5536	98.3213	63.1885	114.806	6329417	1	12172	0.136977	0.0166843	-0.0210675	2.94745	0.137	0.1045	0.1685	0.1095	0.164	0.1155	0.1585	0.945301	12517506	0.0244906	0.0155004	2.90903	16.1843	0.020996	0.007978	0.064182	0.009254	0.050238	0.01107	0.039949	0.842751	385003	0.156977	0.0788729	0.569727	2.97786	0.149571	0.0387641	0.327601	0.047789	0.297044	0.0607322	0.263354	0.842751	384126	0.206417
HC227	Ccc	HC227_Ccc_65	100	92.8416	96.2879	0	6594196	1	13085	0.289894	0.012332	-0.136624	3.53324	0.29	0.2655	0.3135	0.27	0.31	0.2745	0.3055	0.997279	19791486	0.0511901	0.0251041	2.41949	13.6317	0.044156	0.024056	0.117262	0.026288	0.0990987	0.029168	0.082007	0.993512	744810	0.0422604	0.0282417	2.01859	8.0466	0.033666	0.012989	0.122915	0.015149	0.103301	0.018031	0.07991	0.993512	744810	0.233015
HC227	Ccc	HC227_Ccc_66	23.5307	1.96094	3.62018	324.977	255798	1	442	0.252618	0.0296696	-0.65221	3.30153	0.25775	0.188025	0.295963	0.197525	0.289475	0.20855	0.2845	0.673445	3916	0.193933	0.0950124	0.301019	2.89001	0.191961	0.0242708	0.384049	0.0440183	0.349211	0.0718695	0.314227	0.37064	36	0.0977104	0.0497274	-0.00741357	2.21825	0.103821	0.018764	0.184179	0.02106	0.171129	0.026011	0.16317	0.37064	36	0.293282
HC227	Ccc	HC227_Ccc_67	98.0593	82.3268	89.507	1.9791	2950653	1	5422	0.290346	0.0226948	-0.801226	3.86828	0.294	0.2365	0.3255	0.2475	0.3215	0.2595	0.316	0.868243	1412040	0.0940762	0.0635799	1.916	8.06229	0.074194	0.029495	0.269326	0.033014	0.220327	0.037855	0.175062	0.636844	27028	0.0666268	0.0360267	1.66739	6.82407	0.0572985	0.0231867	0.163651	0.026884	0.139415	0.0319988	0.113616	0.636844	27028	0.234843
HC227	Ccc	HC227_Ccc_68	99.1151	39.5358	56.5246	0.892828	2495839	1	3723	0.225049	0.019515	0.115416	3.19541	0.225	0.1875	0.264	0.1935	0.258	0.2	0.25	0.21805	22578	0.154049	0.0794131	1.97482	8.93689	0.135137	0.0616942	0.37281	0.0701628	0.302783	0.0805488	0.247028	0.0504816	66	0.0450056	0.0227673	1.12561	4.52536	0.0409195	0.0105934	0.100301	0.015309	0.0915882	0.021559	0.0730235	0.0504816	66	0.19635
HC227	Ccc	HC227_Ccc_69	62.9986	0.318667	0.634125	58.7337	11232	1	20	0.20785	0.0386578	-0.143441	1.93496	0.209	0.1446	0.262962	0.1522	0.258925	0.15705	0.25535	0.629986	3	0.0285697	0.0206877	0.187975	1.5	0.02643	0.00990475	0.0490533	0.0107745	0.0478626	0.012514	0.0454812	-1	1	1	NA	NA	NA	1	1	1	1	1	1	1	-1	1	1
HC227	Ccc	HC227_Ccc_6	92.4819	88.4686	90.4307	8.12931	3916278	1	6960	0.192083	0.0159247	-0.177152	3.22751	0.193	0.159488	0.2225	0.1645	0.217	0.1715	0.2115	0.764475	1511191	0.0611663	0.0310972	1.59632	6.66891	0.053561	0.023536	0.143236	0.026485	0.121188	0.030478	0.101278	0.452764	20100	0.11894	0.0622372	0.73254	3.01094	0.107312	0.0328203	0.259382	0.0393187	0.235441	0.0480845	0.208254	0.452764	20100	0.253298
HC227	Ccc	HC227_Ccc_70	51.7872	89.0228	65.4817	93.0979	8313741	1	16436	0.329532	0.0163492	-1.36069	8.5649	0.331	0.2915	0.356	0.302	0.3525	0.311	0.3475	0.995364	29895778	0.035717	0.037788	11.5237	174.024	0.029265	0.013907	0.090943	0.015574	0.069257	0.01782	0.053617	0.985126	1091503	0.0604644	0.0335586	1.83301	10.1146	0.054478	0.017344	0.137914	0.020741	0.118516	0.025491	0.100842	0.985126	1091503	0.187502
HC227	Ccc	HC227_Ccc_71	53.7547	88.2137	66.8022	86.0303	3536769	1	6908	0.193769	0.0167462	-0.163181	3.74006	0.1945	0.1575	0.226	0.164675	0.22	0.173	0.214	0.985389	4652775	0.0678279	0.038281	0.307696	2.00165	0.06753	0.01717	0.138811	0.019245	0.128717	0.022219	0.117911	0.953282	152076	0.119777	0.0894317	0.276846	1.64408	0.116123	0.0147229	0.275008	0.0175088	0.255225	0.0213585	0.23488	0.953282	152076	0.237096
HC227	Ccc	HC227_Ccc_72	28.011	99.0373	43.6705	257.003	12484916	1	22548	0.179735	0.022921	0.487764	4.46568	0.1795	0.137	0.2305	0.1435	0.218	0.151	0.2065	0.74038	29525770	0.08041	0.0631865	3.12515	18.0486	0.063992	0.022148	0.254044	0.025622	0.201355	0.030455	0.147636	0.638631	921403	0.227069	0.131827	0.388985	2.63904	0.231897	0.036958	0.509123	0.0445631	0.452142	0.056533	0.394324	0.638631	921403	0.328615
HC227	Ccc	HC227_Ccc_73	51.1813	60.7993	55.5772	95.384	9869684	1	15646	0.326202	0.0140033	-0.42682	4.01774	0.327	0.2965	0.3515	0.3025	0.348	0.3085	0.343	0.386902	1223830	0.03116	0.0131275	2.54888	17.8136	0.028718	0.014675	0.0620183	0.016289	0.0534225	0.018392	0.045993	0.0957251	3741	0.0685374	0.0338379	1.1427	4.71034	0.061157	0.022455	0.151377	0.027345	0.133504	0.032708	0.11502	0.0957251	3741	0.190414
HC227	Ccc	HC227_Ccc_74	43.5615	0.770525	1.51427	129.561	47643	1	75	0.23768	0.0278748	0.0329932	2.2443	0.236	0.187775	0.283075	0.1927	0.28195	0.2049	0.2775	0.338623	21	0.0556739	0.0570812	0.860703	1.90991	0.024504	0.007096	0.150304	0.007311	0.146953	0.00739	0.145562	0.227903	0	NA	NA	NA	NA	NA	NA	NA	NA	NA	NA	NA	0.227903	0	NA
HC227	Ccc	HC227_Ccc_75	99.7894	89.9555	94.6176	0.211091	3417101	1	6687	0.321589	0.0231416	-1.34028	7.40129	0.3245	0.266075	0.358	0.281	0.353	0.2945	0.347	0.989556	4468555	0.0419356	0.0492309	5.04513	35.4846	0.028106	0.012521	0.174005	0.014025	0.109576	0.016052	0.073861	0.963247	148785	0.050093	0.0274037	1.64859	7.00588	0.043408	0.0166116	0.124044	0.0194646	0.104675	0.0232304	0.085542	0.963247	148785	0.144052
HC227	Ccc	HC227_Ccc_76	19.3728	52.891	28.3585	416.189	10213722	1	18246	0.223802	0.0206627	-0.297735	3.03401	0.225	0.1795	0.2615	0.1875	0.256	0.196	0.2495	0.773529	11288376	0.13299	0.0563997	1.55018	6.53626	0.119509	0.061756	0.281316	0.06875	0.244774	0.077349	0.20708	0.481413	166176	0.0762563	0.0536768	2.66172	13.004	0.061699	0.02281	0.231175	0.0268318	0.179723	0.032172	0.133442	0.481413	166176	0.295738
HC227	Ccc	HC227_Ccc_77	47.1604	0.15047	0.299983	112.042	11234	1	17	0.179676	0.0134721	-0.124115	2.30439	0.183	0.1567	0.2018	0.1589	0.2006	0.1624	0.1952	0.471604	0	NA	NA	NA	NA	NA	NA	NA	NA	NA	NA	NA	-1	1	1	NA	NA	NA	1	1	1	1	1	1	1	-1	1	1
HC227	Ccc	HC227_Ccc_78	41.8081	0.0685165	0.136809	139.188	7754	1	10	0.26145	0.00506869	-0.20096	2.15901	0.2625	0.25345	0.268663	0.2539	0.268325	0.2548	0.26765	-1	1	1	NA	NA	NA	1	1	1	1	1	1	1	-1	1	1	NA	NA	NA	1	1	1	1	1	1	1	-1	1	1
HC227	Ccc	HC227_Ccc_79	96.5903	63.6048	76.7015	3.53009	2218330	1	3511	0.365032	0.0144406	-0.375573	3.31094	0.366	0.3355	0.391	0.3395	0.387	0.346	0.383	0.365528	51040	0.0152199	0.0059566	1.18245	5.39093	0.014187	0.00669697	0.030212	0.007647	0.0266711	0.0088419	0.022889	0.0894182	171	0.048358	0.0170784	0.905526	4.38667	0.046026	0.0202137	0.0907402	0.0240065	0.0780075	0.030371	0.072365	0.0894182	105	0.132081
HC227	Ccc	HC227_Ccc_7	6.31187	3.31634	4.34812	1484.32	3471752	1	5447	0.324937	0.0244205	-0.406777	3.37894	0.327	0.272075	0.3685	0.2815	0.3625	0.2925	0.355	0.392385	296065	0.107079	0.0579289	1.0344	3.71668	0.092787	0.0277328	0.252156	0.0364482	0.227355	0.0468324	0.194236	0.185062	3916	0.142855	0.0705903	0.672806	4.00916	0.139236	0.0270471	0.293736	0.0367108	0.265692	0.0549805	0.233061	0.185062	3916	0.310711
HC227	Ccc	HC227_Ccc_80	34.5798	98.096	51.1343	189.186	11564204	1	22838	0.274016	0.021887	-1.04401	5.32621	0.2775	0.22	0.307	0.233	0.3025	0.246	0.2975	0.99083	57851146	0.191082	0.0978894	1.16814	5.01641	0.175254	0.051678	0.444412	0.060481	0.381583	0.077081	0.317007	0.96861	2114596	0.193386	0.0921757	0.0251649	2.52338	0.201392	0.033429	0.36642	0.0416808	0.338297	0.056814	0.307381	0.96861	2114596	0.356795
HC227	Ccc	HC227_Ccc_81	54.2707	94.5689	68.9645	84.2614	3741793	1	7443	0.224027	0.0166037	-0.6185	4.3883	0.225	0.186	0.254	0.1945	0.2485	0.2035	0.2435	0.99953	6550390	0.100262	0.0495099	1.22217	5.84378	0.096273	0.035516	0.218143	0.039366	0.185965	0.044808	0.159638	0.998046	250278	0.0816471	0.0552777	1.18179	5.77303	0.074822	0.0134019	0.206111	0.016338	0.177743	0.020877	0.150746	0.998046	250278	0.279925
HC227	Ccc	HC227_Ccc_82	59.841	90.7599	72.1266	67.1094	6128122	1	12103	0.339249	0.0186553	-1.90483	14.2801	0.3405	0.3015	0.3695	0.3115	0.365	0.319	0.3595	0.996845	16031953	0.0428187	0.0459981	9.61119	120.549	0.036617	0.013947	0.097034	0.015771	0.076216	0.018338	0.063116	0.988051	574056	0.0576335	0.0340895	2.55081	14.6468	0.051006	0.017312	0.141744	0.020695	0.114661	0.025458	0.0940695	0.988051	571915	0.15979
HC227	Ccc	HC227_Ccc_83	50.0587	95.0229	65.573	99.7657	9802305	1	19222	0.299739	0.0288522	-1.19784	5.25936	0.305	0.226263	0.3425	0.2445	0.337	0.2625	0.3305	0.991551	37684221	0.0672603	0.0845399	3.84585	19.7657	0.040773	0.01766	0.356629	0.019913	0.228581	0.022958	0.125643	0.96681	1279200	0.0413975	0.0282329	2.74584	14.8635	0.034215	0.012178	0.118014	0.014421	0.0931	0.0174529	0.071824	0.96681	1279200	0.14065
HC227	Ccc	HC227_Ccc_84	97.7178	89.8056	93.5947	2.33553	3961647	1	7337	0.16964	0.0128279	0.0839802	3.0251	0.1695	0.145	0.1955	0.149	0.191	0.1535	0.186	0.883463	2831010	0.0341028	0.0173405	4.54948	45.0827	0.030172	0.016239	0.071994	0.017787	0.062002	0.0198029	0.052239	0.672353	53956	0.10965	0.0528412	1.39581	5.97009	0.098131	0.0401601	0.243345	0.0465305	0.212285	0.05491	0.179589	0.672353	53956	0.237342
HC227	Ccc	HC227_Ccc_85	97.6007	77.2609	86.2478	2.45829	5684396	1	9632	0.341747	0.0173976	-0.822908	5.28948	0.343	0.3025	0.3715	0.3115	0.3675	0.32	0.362	0.597118	1405326	0.0255688	0.0120275	1.8773	8.42354	0.022542	0.011463	0.057569	0.012676	0.049015	0.01424	0.040686	0.264282	12246	0.0496806	0.0235286	1.2727	5.4643	0.0447795	0.0178585	0.108303	0.0207787	0.0946525	0.0243985	0.081103	0.264282	12246	0.138779
HC227	Ccc	HC227_Ccc_86	10.6176	2.26257	3.73024	841.831	796817	1	1237	0.224048	0.0247067	0.540318	3.25656	0.2195	0.1834	0.27915	0.1895	0.272	0.1968	0.2585	0.334689	8778	0.18246	0.0771144	0.731717	4.91662	0.176681	0.0378479	0.366378	0.0556564	0.321854	0.0887041	0.274039	0.15593	91	0.175896	0.0895915	-0.364738	2.12037	0.187786	0.0180308	0.313648	0.0210365	0.309417	0.031744	0.284737	0.15593	91	0.285054
HC227	Ccc	HC227_Ccc_87	66.7979	0.295868	0.589126	49.7052	12442	1	19	0.224816	0.0284406	0.895686	2.14099	0.212	0.1954	0.274575	0.1963	0.27165	0.1981	0.2702	0.500402	1	0.001996	NA	NA	NA	0.001996	0.001996	0.001996	0.001996	0.001996	0.001996	0.001996	-1	1	1	NA	NA	NA	1	1	1	1	1	1	1	-1	1	1
HC227	Ccc	HC227_Ccc_88	3.17358	0.280495	0.515434	3051.01	248552	1	355	0.259101	0.0348984	-0.721865	4.92871	0.262	0.17085	0.327225	0.19585	0.3128	0.2175	0.2951	0.133702	55	0.277615	0.166216	0.487005	2.85195	0.264135	0.0234799	0.65911	0.0315406	0.59454	0.0538782	0.499597	-1	1	1	NA	NA	NA	1	1	1	1	1	1	1	-1	1	1
HC227	Ccc	HC227_Ccc_89	99.9677	95.75	97.8134	0.0323596	5057319	1	9790	0.340389	0.0142735	-0.96165	6.6635	0.3415	0.310362	0.365	0.317	0.3615	0.3235	0.357	0.981786	8390656	0.0285463	0.0186146	5.15194	47.1586	0.024146	0.012557	0.069913	0.013838	0.055048	0.015495	0.043928	0.921586	250986	0.0330849	0.0180587	1.90165	8.57305	0.028926	0.011258	0.0821524	0.013192	0.0677755	0.015751	0.054774	0.921586	250986	0.146717
HC227	Ccc	HC227_Ccc_8	62.364	95.765	75.5369	60.3489	10397082	1	20418	0.327936	0.0230591	-1.25343	6.2451	0.331	0.271213	0.3625	0.2865	0.3585	0.3	0.3535	0.994247	43110255	0.0482423	0.0459064	4.86692	39.9318	0.036352	0.013131	0.169944	0.015097	0.119645	0.018055	0.084654	0.965413	1466328	0.071922	0.0433409	1.95842	9.58536	0.0625175	0.020036	0.185897	0.023959	0.153602	0.029511	0.124038	0.965413	1456071	0.178336
HC227	Ccc	HC227_Ccc_90	98.8112	91.9823	95.2745	1.20312	3093417	1	6051	0.200218	0.0142942	-0.0694562	3.24439	0.2005	0.172	0.228	0.1765	0.223	0.182	0.218	0.987868	3686970	0.0535307	0.0213498	3.26023	22.6746	0.049133	0.029264	0.102917	0.031757	0.088279	0.034857	0.075456	0.956299	123256	0.0590143	0.0263008	1.95565	11.9403	0.0546775	0.0232474	0.119811	0.026837	0.104627	0.0316305	0.0901655	0.956299	123256	0.266846
HC227	Ccc	HC227_Ccc_91	83.8414	0.130328	0.260252	19.2729	18306	1	22	0.316886	0.0676818	-1.59086	3.67047	0.34775	0.170912	0.364013	0.1743	0.359425	0.1811	0.35795	-1	1	1	NA	NA	NA	1	1	1	1	1	1	1	-1	1	1	NA	NA	NA	1	1	1	1	1	1	1	-1	1	1
HC227	Ccc	HC227_Ccc_92	94.9147	98.7557	96.7971	5.35775	8466225	1	16435	0.294772	0.0160277	-0.479679	3.62966	0.2965	0.2585	0.323	0.2655	0.3185	0.2735	0.3135	0.979317	24833628	0.0760941	0.0484012	2.16451	9.18894	0.059304	0.029929	0.210996	0.03277	0.173802	0.036524	0.139668	0.928181	774390	0.06194	0.0374913	1.92735	8.20939	0.051587	0.0198117	0.164262	0.023136	0.135822	0.027625	0.109837	0.928181	774390	0.239247
HC227	Ccc	HC227_Ccc_93	100	95.5755	97.7377	0	6369544	1	12438	0.230797	0.018195	-0.681613	3.73809	0.233	0.187	0.261	0.1965	0.2565	0.207	0.2515	0.990853	15083778	0.110661	0.0503078	2.59236	13.269	0.097468	0.057663	0.250804	0.062275	0.205676	0.068149	0.166416	0.959929	489555	0.0402565	0.0468782	7.87495	83.0625	0.030494	0.012763	0.133275	0.01478	0.0915343	0.017396	0.062271	0.959929	489555	0.145618
HC227	Ccc	HC227_Ccc_94	100	99.3977	99.698	0	6662953	1	12994	0.367344	0.0178413	-0.46588	4.0252	0.3685	0.331	0.3985	0.337	0.394	0.344	0.389	0.988601	16270660	0.018324	0.0112408	2.74608	18.6578	0.015012	0.006858	0.047511	0.007682	0.039993	0.008782	0.03236	0.946983	517653	0.0307269	0.0175181	1.97616	9.77312	0.026682	0.0097273	0.0758554	0.011466	0.0629758	0.013807	0.051894	0.946983	499500	0.126576
HC227	Ccc	HC227_Ccc_95	100	97.8418	98.9091	0	2709236	1	5203	0.316334	0.0170281	-0.431885	5.51879	0.3165	0.282	0.3485	0.2895	0.3425	0.296	0.3365	0.968673	2216565	0.0404829	0.0286105	4.86645	36.9183	0.033694	0.01774	0.113461	0.019559	0.081044	0.021892	0.0606306	0.889109	61776	0.0454155	0.0280947	2.91022	16.271	0.0384	0.0163037	0.124577	0.018912	0.0984938	0.02215	0.0739565	0.889109	61776	0.165356
HC227	Ccc	HC227_Ccc_96	99.4511	81.879	89.8136	0.551929	3836952	1	6664	0.279974	0.0204849	-0.780553	4.15048	0.2825	0.231	0.3145	0.242	0.3095	0.253	0.3035	0.681248	933661	0.0683792	0.0401298	2.35415	9.93607	0.05656	0.028583	0.19285	0.031808	0.152945	0.035854	0.114713	0.328924	8515	0.0275563	0.0151321	1.62522	6.35603	0.023711	0.0093657	0.0691618	0.0110584	0.0586276	0.0130382	0.0476662	0.328924	8515	0.163173
HC227	Ccc	HC227_Ccc_97	34.4992	89.241	49.7614	189.862	15309379	1	28563	0.334732	0.019335	-0.973512	6.56635	0.336	0.2915	0.368	0.3025	0.363	0.312	0.357	0.871069	49745325	0.0301716	0.0253916	10.9618	194.918	0.025598	0.011528	0.071038	0.013064	0.05699	0.015095	0.046318	0.714262	1239525	0.0465201	0.0243527	1.2049	4.85562	0.041185	0.014463	0.107368	0.017128	0.09394	0.02072	0.0798	0.714262	1239525	0.128656
HC227	Ccc	HC227_Ccc_98	100	89.9233	94.6943	0	2627864	1	5203	0.27884	0.0236514	-1.62607	7.92779	0.283	0.22	0.312475	0.2365	0.3075	0.25	0.303	0.99665	3051685	0.0814606	0.067567	3.48749	19.0524	0.059723	0.030542	0.276294	0.033549	0.205544	0.037483	0.147546	0.99221	112575	0.0350742	0.0315917	4.24579	28.9041	0.026427	0.0102893	0.117937	0.012028	0.0882299	0.014385	0.0629162	0.99221	112575	0.181311
HC227	Ccc	HC227_Ccc_99	13.125	1.09942	2.02889	661.905	601509	1	898	0.338834	0.0275593	-0.30566	2.69412	0.342	0.2805	0.389	0.289	0.3815	0.30235	0.374	0.280614	3081	0.12935	0.100427	1.44025	4.49829	0.105404	0.007211	0.401997	0.015691	0.369226	0.030962	0.322869	0.102266	28	0.141982	0.106481	0.242725	1.43173	0.10988	0.016049	0.304767	0.0202383	0.300788	0.0237931	0.280576	0.102266	28	0.194928
HC227	Ccc	HC227_Ccc_9	30.4975	93.4176	45.9832	227.896	13872226	1	27564	0.283564	0.0258915	-1.23962	5.5828	0.2875	0.2135	0.323	0.233	0.3175	0.2515	0.311	0.997683	88944453	0.169148	0.113835	1.88663	7.08676	0.139408	0.047168	0.51526	0.055513	0.418106	0.06686	0.312187	0.994188	3386503	0.126707	0.0735836	0.742652	3.56334	0.120867	0.0247976	0.288403	0.030541	0.255172	0.039135	0.22278	0.994188	3386503	0.30319
HC227	Mc	HC227_Mc_bin.100	99.7322	95.9083	97.7829	0.26854	4357580	1	8678	0.285222	0.016475	-1.36342	7.54879	0.2875	0.2455	0.311	0.2565	0.307	0.266	0.303	0.996765	9088716	0.0975178	0.0732206	3.75971	20.1478	0.076905	0.044018	0.332867	0.047879	0.23927	0.052773	0.146937	0.994799	352380	0.0537625	0.0287094	2.57306	16.9729	0.0476315	0.0193045	0.125609	0.022475	0.104608	0.026679	0.0864461	0.994799	352380	0.227138
HC227	Mc	HC227_Mc_bin.101	99.6225	94.2591	96.8667	0.378881	5466253	1	10820	0.322578	0.0208307	-1.23885	7.74118	0.3245	0.276	0.356	0.2875	0.352	0.297	0.346	0.995028	13243231	0.0496663	0.051217	7.92257	85.136	0.039601	0.017412	0.12616	0.019521	0.097903	0.022415	0.076827	0.989938	489555	0.0667329	0.0386528	1.74417	7.31956	0.05695	0.021057	0.172951	0.024695	0.143828	0.029681	0.116179	0.989938	489555	0.213706
HC227	Mc	HC227_Mc_bin.102	98.8142	76.7588	86.4012	1.20005	1614459	1	3157	0.1981	0.0160783	-0.550572	3.70294	0.199	0.16095	0.226	0.1695	0.2221	0.1775	0.217	0.992367	986310	0.0749519	0.0323507	2.18219	10.8821	0.067444	0.036752	0.159387	0.040498	0.133992	0.045149	0.112152	0.945296	32385	0.113282	0.0610287	1.32301	4.87484	0.097441	0.0370624	0.272411	0.043645	0.239049	0.052046	0.200019	0.945296	32385	0.259577
HC227	Mc	HC227_Mc_bin.103	100	71.8356	83.6097	0	1967326	1	3873	0.225264	0.0149544	-0.395805	4.24759	0.2255	0.194	0.252	0.2005	0.2475	0.2065	0.243	0.994138	1590436	0.117377	0.0362608	1.5223	7.978	0.111162	0.066483	0.204995	0.07232	0.182661	0.079513	0.161859	0.975077	55945	0.0772166	0.032761	1.16899	5.36651	0.071514	0.030378	0.156552	0.035247	0.139049	0.0413814	0.120413	0.975077	55945	0.225397
HC227	Mc	HC227_Mc_bin.104	99.7885	91.6607	95.5521	0.211923	2735513	1	5442	0.213722	0.0169663	-0.600884	3.59415	0.2155	0.175	0.242	0.183025	0.2385	0.192	0.234	0.996978	3536470	0.0766007	0.0296161	1.65046	6.72983	0.068974	0.040746	0.156504	0.044125	0.137362	0.048398	0.11616	0.994966	137026	0.0432936	0.0212902	1.75739	8.29297	0.0386425	0.016262	0.0979061	0.0188353	0.083757	0.0221955	0.0699445	0.994966	137026	0.185163
HC227	Mc	HC227_Mc_bin.105	98.1966	4.10949	7.88884	1.83655	834878	1	1119	0.323296	0.0174678	-0.268163	3.96529	0.324	0.288475	0.357525	0.294	0.352	0.3014	0.345	0.0408311	21	0.0486869	0.0188889	-0.80163	2.66926	0.056515	0.011109	0.0714145	0.018326	0.068804	0.025287	0.066605	-1	1	1	NA	NA	NA	1	1	1	1	1	1	1	-1	1	1
HC227	Mc	HC227_Mc_bin.106	100	38.4579	55.5517	0	1500337	1	2844	0.163585	0.0136475	0.0376739	3.18942	0.1635	0.1365	0.19	0.1415	0.186	0.1465	0.181	0.976447	542361	0.0225125	0.00877736	1.61857	7.66161	0.020652	0.011188	0.044954	0.012302	0.039186	0.013711	0.033579	0.797884	12246	0.0803362	0.0428115	3.5574	23.6664	0.0729835	0.0309769	0.15936	0.0358632	0.138577	0.042652	0.119506	0.797884	12246	0.188305
HC227	Mc	HC227_Mc_bin.107	100	91.3926	95.5027	0	1962493	1	3901	0.226925	0.0182862	-0.767274	4.30736	0.229	0.184	0.2575	0.194	0.253	0.204	0.248	1	1779441	0.0672128	0.0349037	2.23577	10.0923	0.057116	0.031089	0.167776	0.033883	0.13827	0.037466	0.109075	1	67896	0.0319888	0.0253235	3.71803	21.1624	0.025668	0.00991538	0.101998	0.01159	0.0691738	0.0139015	0.0526565	1	67896	0.141857
HC227	Mc	HC227_Mc_bin.108	92.7361	81.3864	86.6913	7.83293	1756739	1	3376	0.168435	0.0166416	0.356135	3.6708	0.1675	0.138	0.2025	0.1425	0.197	0.148	0.19	0.967842	925480	0.0295729	0.0170197	2.21306	10.2827	0.024472	0.012033	0.0778381	0.013351	0.06388	0.015041	0.050609	0.924942	26335	0.0631251	0.0482955	1.48923	4.70283	0.042929	0.0161352	0.190727	0.0187025	0.166912	0.022295	0.138522	0.924942	26335	0.167872
HC227	Mc	HC227_Mc_bin.109	99.9006	50.794	67.3462	0.0994647	1702486	1	3373	0.238648	0.0245882	-0.808933	3.64984	0.2425	0.17965	0.2765	0.1918	0.272	0.2035	0.266	0.994612	1293636	0.142529	0.0777542	1.64227	5.88171	0.116074	0.060429	0.35771	0.066611	0.309756	0.07403	0.252839	0.977597	48205	0.103871	0.047577	1.29927	5.36563	0.094218	0.0395033	0.228712	0.045514	0.197825	0.0539624	0.166383	0.977597	48205	0.260944
HC227	Mc	HC227_Mc_bin.10	100	86.0364	92.4942	0	3802044	1	7529	0.190368	0.0174232	-0.524518	3.54926	0.192	0.1505	0.2205	0.159	0.2165	0.168	0.211	0.997777	6420736	0.0533131	0.0220204	1.71023	7.58979	0.048158	0.025978	0.111458	0.028553	0.096228	0.031849	0.081253	0.991395	236328	0.163164	0.066158	0.916862	4.0855	0.152222	0.064784	0.320681	0.0750477	0.288258	0.0884247	0.253092	0.991395	236328	0.198725
HC227	Mc	HC227_Mc_bin.110	99.3981	87.3317	92.975	0.605585	2373417	1	4714	0.295574	0.0212549	-1.30821	6.51989	0.2985	0.2415	0.3275	0.2555	0.323	0.2705	0.3185	0.994978	2598060	0.0714148	0.053455	3.17297	15.991	0.055043	0.027781	0.23874	0.030684	0.17572	0.03449	0.123542	0.99109	98790	0.0486705	0.0382378	2.54451	10.3405	0.037054	0.014677	0.173673	0.017065	0.141863	0.0203129	0.0891917	0.99109	98790	0.22031
HC227	Mc	HC227_Mc_bin.111	100	77.1901	87.1269	0	3320005	1	6610	0.230514	0.0126441	-0.61117	4.30934	0.2315	0.203	0.252	0.209	0.249	0.215	0.2455	1	5227761	0.107746	0.0330728	1.71601	9.16595	0.101532	0.063282	0.188746	0.068065	0.167928	0.074058	0.148213	0.992799	200661	0.0955951	0.039895	1.57995	8.41785	0.089301	0.0391925	0.189806	0.045288	0.165486	0.053029	0.143536	0.992799	200661	0.2939
HC227	Mc	HC227_Mc_bin.112	99.7049	60.555	75.348	0.295948	2478615	1	4884	0.342884	0.017731	-1.80791	14.8499	0.344	0.308	0.372462	0.316	0.368	0.3235	0.363	0.989297	2586675	0.0288053	0.0411539	13.1731	197.892	0.023271	0.011878	0.060257	0.013188	0.049282	0.014872	0.040592	0.986359	92235	0.0394626	0.0265366	4.5132	34.2574	0.034078	0.01352	0.0910814	0.0158014	0.0749156	0.018791	0.0621854	0.986359	91806	0.10965
HC227	Mc	HC227_Mc_bin.113	99.5988	64.979	78.6476	0.402808	2315194	1	4597	0.296909	0.0227873	-2.14412	10.7819	0.3005	0.23445	0.328	0.261	0.3235	0.2745	0.319	0.993268	2480878	0.0890795	0.106553	3.73037	17.3367	0.058056	0.0286129	0.508859	0.031761	0.302024	0.035886	0.138094	0.993268	95266	0.0450812	0.0342144	3.16097	17.8296	0.035763	0.01322	0.143694	0.0155055	0.108716	0.018626	0.0791805	0.993268	95266	0.207736
HC227	Mc	HC227_Mc_bin.114	98.1283	91.4437	94.6681	1.90738	6430853	1	12516	0.23772	0.0183617	-0.764632	4.33366	0.24	0.1925	0.2685	0.2025	0.2635	0.2145	0.2585	0.9826	14864878	0.134837	0.0573135	1.9321	8.17644	0.119103	0.070205	0.294729	0.075863	0.252353	0.083041	0.208226	0.928741	477753	0.0791874	0.0420878	1.92025	8.56314	0.069086	0.028782	0.195419	0.033353	0.162141	0.0394192	0.130637	0.928741	477753	0.258051
HC227	Mc	HC227_Mc_bin.115	99.8789	85.6284	92.2063	0.121216	1894558	1	3695	0.193317	0.0167766	0.068885	3.9503	0.1935	0.158675	0.228325	0.1655	0.22	0.173	0.213	0.987931	1306536	0.0374308	0.0188863	2.35299	12.5501	0.032264	0.017025	0.0869753	0.018652	0.073223	0.020749	0.060191	0.958623	41616	0.0355135	0.0199044	1.93804	8.85376	0.030435	0.0122034	0.0891119	0.0141625	0.0746798	0.016861	0.0602175	0.958623	41616	0.119248
HC227	Mc	HC227_Mc_bin.116	100	65.4365	79.1077	0	1838126	1	3647	0.190124	0.0154411	-0.501105	3.60148	0.1915	0.1545	0.217	0.1625	0.213	0.171	0.2085	1	1525131	0.0513621	0.0202584	1.64173	7.25679	0.046703	0.0257203	0.104826	0.028298	0.090817	0.031506	0.077205	0.994991	56616	0.18255	0.0725161	1.13131	5.54965	0.172255	0.0736061	0.353969	0.085756	0.311902	0.100942	0.273933	0.994991	56616	0.227856
HC227	Mc	HC227_Mc_bin.117	100	16.869	28.8682	0	423114	1	835	0.270369	0.0186974	-0.635576	4.70448	0.271	0.229	0.3055	0.23885	0.29915	0.248	0.2935	1	74305	0.132874	0.0522341	1.26899	6.11163	0.123485	0.0580674	0.264111	0.068276	0.23073	0.0793126	0.199314	0.95432	2485	0.128987	0.0663616	1.60793	7.49956	0.11796	0.0370679	0.294151	0.0470924	0.243422	0.0596548	0.205224	0.95432	2485	0.240278
HC227	Mc	HC227_Mc_bin.118	76.8872	71.3206	73.9993	30.0607	3107561	1	5909	0.206365	0.0183393	-0.148276	3.44986	0.207	0.168	0.241	0.1755	0.2355	0.183	0.2285	0.950859	2539131	0.0596545	0.028104	1.95045	9.30652	0.052748	0.026823	0.133101	0.029545	0.112395	0.033085	0.094218	0.805832	61776	0.0439398	0.027135	1.70458	7.32565	0.036966	0.0127384	0.11475	0.01492	0.0967242	0.0178265	0.079281	0.805832	61776	0.209692
HC227	Mc	HC227_Mc_bin.119	100	95.6438	97.7734	0	1711095	1	3412	0.22114	0.0131337	-0.674529	3.92062	0.2225	0.1885	0.243	0.196775	0.24	0.204	0.2365	1	1410360	0.0740256	0.0425751	2.70545	11.9405	0.061268	0.035211	0.215772	0.038251	0.155533	0.042083	0.119146	1	54285	0.0579157	0.0384409	2.91185	15.0998	0.048439	0.0189241	0.165388	0.022083	0.1257	0.0264088	0.0952596	1	54285	0.272395
HC227	Mc	HC227_Mc_bin.11	100	92.338	96.0164	0	2022239	1	4029	0.231513	0.020949	-0.177511	6.8405	0.234	0.184	0.263	0.194	0.258	0.206	0.2525	1	1939465	0.089996	0.0579452	3.84964	23.2509	0.074514	0.041386	0.245859	0.045182	0.17887	0.050018	0.138978	1	74691	0.0538694	0.0309676	1.93036	8.19993	0.045881	0.0182022	0.141462	0.0213495	0.117158	0.025371	0.092473	1	74691	0.183762
HC227	Mc	HC227_Mc_bin.120	37.0615	97.0641	53.6414	169.822	15238050	1	29884	0.225908	0.0147011	-0.688767	4.63555	0.227	0.1935	0.251	0.2005	0.2475	0.2075	0.243	0.988533	91212771	0.142298	0.0476511	1.27545	5.60953	0.133017	0.076197	0.261654	0.083045	0.23378	0.091774	0.205007	0.962845	3151305	0.104865	0.0512201	1.27139	5.67653	0.094755	0.035229	0.230445	0.041522	0.202608	0.049999	0.173138	0.962845	3151305	0.292997
HC227	Mc	HC227_Mc_bin.121	84.2023	79.2905	81.6727	18.7615	5411342	1	10722	0.294316	0.0263007	-0.9526	4.29608	0.299	0.2285	0.335	0.2415	0.3285	0.257	0.322	0.993167	13186680	0.0830303	0.0897957	2.41553	9.0184	0.04575	0.020814	0.36163	0.02313	0.296549	0.026227	0.209755	0.989563	493521	0.056334	0.0499869	2.48506	10.4214	0.039107	0.013454	0.209257	0.015757	0.159707	0.018993	0.11765	0.989563	493521	0.17659
HC227	Mc	HC227_Mc_bin.122	99.7582	79.0701	88.2175	0.242379	5868138	1	11307	0.339694	0.0171042	-1.29074	8.9764	0.341	0.3025	0.368	0.3115	0.364	0.32	0.359	0.978885	10646805	0.0237571	0.0145329	5.88027	69.5244	0.020417	0.011134	0.060269	0.012223	0.045637	0.013618	0.035528	0.907251	296065	0.031711	0.0170247	2.26257	11.229	0.028	0.011516	0.0783702	0.013377	0.0622106	0.015882	0.050355	0.907251	296065	0.121021
HC227	Mc	HC227_Mc_bin.123	99.9206	92.4482	96.0393	0.0794246	3937673	1	7850	0.218848	0.0198954	-0.673816	4.22863	0.2205	0.1715	0.2525	0.183	0.2475	0.194	0.242	0.999206	7463316	0.0801959	0.0396172	2.24492	10.8107	0.069151	0.037545	0.189701	0.041109	0.159021	0.045659	0.128738	0.999206	291466	0.0559582	0.0359532	2.24409	10.1219	0.045876	0.0180956	0.157824	0.02106	0.130874	0.0250275	0.100397	0.999206	291466	0.243107
HC227	Mc	HC227_Mc_bin.124	99.5643	95.5289	97.5049	0.437595	1790692	1	3523	0.189781	0.0158547	-0.418067	3.98624	0.191	0.156	0.2185	0.163	0.2135	0.17	0.209	0.985454	1327635	0.0434865	0.0202299	2.40864	12.035	0.038395	0.021237	0.100301	0.023266	0.082173	0.02584	0.066304	0.970086	47895	0.116508	0.0507303	1.25161	5.43527	0.107391	0.0446638	0.246045	0.0524134	0.213118	0.0621702	0.182056	0.970086	47895	0.19666
HC227	Mc	HC227_Mc_bin.125	96.7021	88.858	92.6142	3.4104	2534987	1	5008	0.209326	0.0162437	-0.274067	3.26088	0.2095	0.1745	0.2395	0.182	0.235	0.1885	0.23	1	2762425	0.0646105	0.0277934	1.7239	7.65053	0.057623	0.031205	0.137453	0.03412	0.119123	0.037886	0.100631	0.988811	99681	0.113605	0.0627263	1.80248	7.34788	0.097987	0.039327	0.292432	0.045942	0.239959	0.0544	0.191996	0.988811	99681	0.169157
HC227	Mc	HC227_Mc_bin.126	99.9617	97.0215	98.4696	0.0383557	3963662	1	7871	0.283703	0.0155695	-1.50694	9.03622	0.2855	0.2475	0.3075	0.257	0.3045	0.2655	0.3005	0.999617	7218100	0.0802166	0.0504481	4.82742	39.1969	0.067854	0.03846	0.21181	0.041893	0.158287	0.046286	0.119877	0.995681	271953	0.0564824	0.0299175	2.33403	12.0136	0.04992	0.021054	0.134338	0.0243792	0.109627	0.028743	0.0896266	0.995681	271953	0.233199
HC227	Mc	HC227_Mc_bin.127	36.1136	91.4956	51.7868	176.904	10135737	1	19785	0.332934	0.0153304	-0.42305	4.76861	0.333	0.3025	0.3615	0.3085	0.357	0.3145	0.352	0.969633	39325146	0.0315824	0.0136861	2.25019	14.6713	0.029209	0.013709	0.064501	0.015462	0.055106	0.017823	0.047083	0.946253	1355481	0.0417314	0.0212195	1.5612	8.14095	0.038319	0.012775	0.092973	0.01526	0.079649	0.018841	0.067647	0.946253	1355481	0.173264
HC227	Mc	HC227_Mc_bin.128	100	88.2223	93.7427	0	3404816	1	6663	0.321454	0.0232335	-1.34926	7.36766	0.3245	0.266	0.3575	0.2805	0.3525	0.294	0.347	0.989519	4444671	0.0419181	0.0492505	5.03698	35.3862	0.028036	0.01251	0.174038	0.014012	0.109622	0.016033	0.07405	0.962453	148240	0.0497809	0.0269034	1.62273	6.95416	0.043302	0.016601	0.121508	0.0194479	0.103064	0.0232059	0.084751	0.962453	148240	0.14401
HC227	Mc	HC227_Mc_bin.129	99.8935	30.2495	46.4371	0.106622	2052156	1	4038	0.369771	0.0163538	-0.374594	4.28602	0.3705	0.3355	0.399	0.342	0.3945	0.3485	0.3895	0.99071	1723296	0.0141794	0.00712894	3.672	29.7131	0.012603	0.006486	0.0308716	0.007196	0.025932	0.0080985	0.021586	0.988095	60031	0.024288	0.0113861	1.28646	5.63008	0.022065	0.00869575	0.0525438	0.0101755	0.0459755	0.012078	0.039168	0.988095	57630	0.110846
HC227	Mc	HC227_Mc_bin.12	95.5982	19.8473	32.8704	4.60444	2052155	1	3402	0.315754	0.0121147	-0.737686	7.22309	0.316	0.292	0.3375	0.297	0.334	0.302	0.3305	0.514391	101926	0.0392146	0.0209149	2.99405	17.4571	0.0334515	0.0184841	0.0890389	0.020423	0.078216	0.022697	0.065082	0.159955	561	0.0613665	0.0434622	1.20398	3.66923	0.043625	0.012826	0.164551	0.01713	0.146535	0.022105	0.132809	0.159955	561	0.204521
HC227	Mc	HC227_Mc_bin.13	99.9435	85.9554	92.4231	0.0565801	3065234	1	5876	0.335144	0.0192238	-1.49335	11.461	0.336	0.297	0.3675	0.3055	0.3625	0.314	0.357	0.965008	2699326	0.0328194	0.0515883	11.4076	149.516	0.02466	0.012718	0.0775099	0.014061	0.061072	0.015783	0.046984	0.871018	73153	0.0815709	0.0412984	1.89359	9.59503	0.072858	0.0292988	0.183005	0.034165	0.156421	0.0405658	0.132034	0.871018	73153	0.122716
HC227	Mc	HC227_Mc_bin.14	99.6686	95.137	97.3501	0.332491	3422048	1	6806	0.221836	0.020749	-0.830999	4.2221	0.224	0.171063	0.255	0.1845	0.251	0.195	0.2455	0.997649	5469778	0.0863677	0.0404931	1.9121	8.22335	0.075251	0.040405	0.198455	0.044429	0.168918	0.049515	0.138253	0.994815	210276	0.0319308	0.0211459	2.83898	16.472	0.026222	0.010396	0.08843	0.012073	0.070882	0.014277	0.0557355	0.994815	210276	0.2384
HC227	Mc	HC227_Mc_bin.15	99.6521	95.2045	97.3775	0.349164	2026286	1	4026	0.192125	0.0193018	-0.285706	3.35853	0.1935	0.1505	0.228187	0.158	0.222	0.1675	0.2155	0.995326	1915903	0.0745488	0.0341841	1.80401	7.84051	0.066701	0.032561	0.169336	0.036568	0.141397	0.041683	0.116285	0.995326	73920	0.133888	0.0638304	1.37422	5.68172	0.120781	0.048753	0.30104	0.0569649	0.259929	0.0675969	0.217337	0.995326	73920	0.240662
HC227	Mc	HC227_Mc_bin.16	82.8325	90.7126	86.5936	20.7255	6673504	1	12500	0.213436	0.0229883	0.141855	3.95619	0.2135	0.167	0.259	0.176	0.249	0.185	0.2405	0.823994	11724903	0.126369	0.0874407	2.62643	12.258	0.100119	0.043875	0.378494	0.049469	0.292397	0.056931	0.223733	0.765672	395605	0.0829748	0.054815	2.2117	10.1262	0.067319	0.024981	0.237247	0.0292832	0.189665	0.035036	0.148084	0.765672	395605	0.238015
HC227	Mc	HC227_Mc_bin.17	100	72.2368	83.8808	0	2324970	1	4552	0.229948	0.0226082	-0.314671	3.49517	0.231	0.182	0.2725	0.191	0.265	0.2015	0.258	0.996621	2065528	0.10279	0.0507132	1.84518	8.02573	0.08907	0.045105	0.240179	0.049797	0.203345	0.055754	0.16748	0.981592	68635	0.0429605	0.0301832	2.04547	8.04975	0.033081	0.012878	0.127663	0.0150794	0.108718	0.0179234	0.0853912	0.981592	68635	0.205607
HC227	Mc	HC227_Mc_bin.18	99.922	98.2649	99.0865	0.0780571	4892632	1	9703	0.254466	0.0186196	-0.494312	4.51234	0.2555	0.2145	0.2875	0.2235	0.2825	0.2315	0.2765	0.996524	10799628	0.124283	0.0540771	1.87333	8.27948	0.110132	0.061389	0.269935	0.066833	0.230627	0.073803	0.192919	0.987294	400065	0.0917813	0.0470098	2.03234	11.5471	0.081799	0.0327336	0.206823	0.038203	0.17797	0.045368	0.14971	0.987294	400065	0.273156
HC227	Mc	HC227_Mc_bin.19	97.2999	84.2145	90.2855	2.77507	4375562	1	8637	0.212063	0.0173027	-0.576987	3.74468	0.2135	0.173	0.242	0.1815	0.2375	0.1895	0.233	0.997267	8130528	0.0725052	0.0347642	2.62064	13.8841	0.063896	0.03484	0.164522	0.038157	0.134148	0.04241	0.110398	0.98002	289180	0.0814209	0.0476944	2.49333	12.184	0.069904	0.0290585	0.215586	0.033752	0.169415	0.0399289	0.133233	0.98002	289180	0.211315
HC227	Mc	HC227_Mc_bin.1	100	48.3886	65.2187	0	1589346	1	3147	0.281501	0.0206584	-0.417511	4.0277	0.2825	0.236325	0.3225	0.246	0.315	0.2565	0.3065	1	1122751	0.117811	0.0632637	1.85845	7.59896	0.100483	0.047009	0.296949	0.052682	0.247231	0.060053	0.198229	0.994406	41905	0.0830917	0.0656194	2.20988	8.90688	0.061703	0.0213578	0.285334	0.0251162	0.22954	0.0303544	0.166229	0.994406	41905	0.218045
HC227	Mc	HC227_Mc_bin.20	95.0131	12.8108	22.5775	5.24865	1259818	1	2346	0.24418	0.015939	-0.0606855	3.01994	0.244	0.215	0.275	0.219	0.2705	0.2245	0.2655	0.903935	309291	0.123643	0.0445029	1.33009	5.55666	0.113161	0.066127	0.237954	0.071884	0.210415	0.078902	0.183345	0.694548	6786	0.103087	0.0520593	1.80911	7.72962	0.0918795	0.0385985	0.253015	0.044796	0.203508	0.0527255	0.163749	0.694548	6786	0.290692
HC227	Mc	HC227_Mc_bin.21	100	89.3511	94.3761	0	3601582	1	6937	0.317684	0.0187849	-1.20287	7.21112	0.3195	0.2745	0.3485	0.2855	0.344	0.296	0.3385	0.969686	4079796	0.0525546	0.0384267	5.01763	40.9582	0.042973	0.021573	0.136857	0.023926	0.107752	0.026975	0.083724	0.907135	120786	0.049896	0.0304739	1.9483	7.92078	0.041519	0.0162066	0.137462	0.018876	0.114239	0.0225405	0.088701	0.907135	120786	0.161308
HC227	Mc	HC227_Mc_bin.22	100	69.9107	82.2911	0	1768101	1	3491	0.25461	0.0238463	-0.732276	4.07836	0.2575	0.198125	0.295	0.20825	0.288	0.2235	0.281	1	1334161	0.184218	0.0855344	1.63295	6.49488	0.161855	0.080981	0.417921	0.090616	0.359957	0.102819	0.298347	0.991756	47278	0.129033	0.0538804	0.870558	3.86087	0.119975	0.0488039	0.256286	0.05716	0.230925	0.067852	0.202505	0.991756	47278	0.265746
HC227	Mc	HC227_Mc_bin.23	95.1129	51.9679	67.2122	5.13824	2749592	1	5329	0.201565	0.0158246	-0.174333	3.14021	0.202	0.169	0.2305	0.1745	0.227	0.1815	0.2215	0.984258	2530125	0.0564725	0.0244103	2.08406	9.30014	0.050373	0.028573	0.127354	0.031129	0.104493	0.034376	0.084946	0.935957	76245	0.0636775	0.0406555	2.33429	9.92425	0.052716	0.0210451	0.193058	0.0246812	0.148629	0.0294554	0.108099	0.935957	76245	0.192719
HC227	Mc	HC227_Mc_bin.24	100	80.2501	89.043	0	7004235	1	13306	0.271625	0.0256782	-0.48457	3.81881	0.2735	0.212812	0.3165	0.2255	0.3095	0.239	0.30175	0.937991	12688203	0.113644	0.0830442	2.40702	9.8859	0.085063	0.040652	0.367911	0.04518	0.294635	0.051086	0.215999	0.827049	331705	0.0484714	0.0316295	3.34838	21.37	0.04084	0.0165866	0.13371	0.01927	0.103315	0.0228134	0.0793636	0.827049	331705	0.229498
HC227	Mc	HC227_Mc_bin.25	10.6397	85.4864	18.9241	839.874	46415640	1	87209	0.176733	0.0184942	-0.0138689	3.20399	0.177	0.14	0.212	0.146	0.206	0.1525	0.1995	0.870815	540366375	0.0693986	0.0308901	1.71649	10.621	0.064577	0.026192	0.140859	0.030327	0.12355	0.03609	0.107085	0.75244	16094301	0.283972	0.121896	0.515319	3.18431	0.273225	0.075681	0.55774	0.100109	0.50615	0.133945	0.447094	0.75244	16094301	0.325439
HC227	Mc	HC227_Mc_bin.26	100	93.8522	96.8286	0	3593755	1	7096	0.256963	0.0262617	-1.20338	4.96715	0.262	0.1895	0.293812	0.205	0.2895	0.2225	0.285	0.993731	5506221	0.102454	0.0713216	2.53494	10.8695	0.078978	0.039486	0.323533	0.043431	0.252048	0.048684	0.185254	0.9793	196251	0.0193085	0.0133819	5.31376	52.7016	0.016379	0.006635	0.0483597	0.007734	0.0394	0.009151	0.031413	0.9793	196251	0.181698
HC227	Mc	HC227_Mc_bin.27	99.8823	39.6808	56.7974	0.117866	2551896	1	4398	0.362558	0.017056	-0.0545811	2.95604	0.3625	0.330462	0.3955	0.335	0.3905	0.341	0.385	0.672321	400065	0.015903	0.00889961	1.83538	8.01835	0.013585	0.005699	0.0397204	0.006471	0.033244	0.007511	0.027156	0.342857	4005	0.0410821	0.0199385	1.54599	7.12995	0.037175	0.0144833	0.0905617	0.017184	0.0785464	0.0203656	0.0655814	0.342857	4005	0.0980077
HC227	Mc	HC227_Mc_bin.28	92.8257	35.2942	51.1429	7.72878	1450830	1	2539	0.256963	0.0184556	-0.85089	4.15888	0.26	0.2145	0.286	0.22345	0.282	0.2325	0.2775	0.703972	148240	0.0879136	0.0445499	1.89437	7.84257	0.0759565	0.0380539	0.214772	0.0423446	0.180863	0.0476289	0.14406	0.377627	1378	0.0343683	0.0172242	1.28083	4.79452	0.030555	0.0119668	0.079877	0.013651	0.0724151	0.0164287	0.0576145	0.377627	1378	0.125625
HC227	Mc	HC227_Mc_bin.29	94.552	4.29171	8.21074	5.76196	268262	1	525	0.295035	0.0314865	-1.40853	5.82743	0.3015	0.20205	0.339	0.2374	0.3349	0.2573	0.3275	0.971054	26106	0.123268	0.0974987	2.17336	8.22981	0.0879505	0.0357519	0.43372	0.0420625	0.323942	0.0489915	0.249532	0.971054	820	0.147474	0.0739686	1.10063	4.22491	0.130656	0.0462359	0.336606	0.0560972	0.293069	0.0694507	0.255925	0.971054	820	0.255879
HC227	Mc	HC227_Mc_bin.2	100	75.0129	85.7227	0	2572951	1	5051	0.210275	0.0198696	-0.724151	3.57649	0.213	0.162625	0.2425	0.172	0.2375	0.1825	0.2335	0.995647	2634660	0.0942486	0.0412273	1.63062	6.74261	0.08372	0.0438405	0.204525	0.048847	0.177811	0.054832	0.149044	0.979565	90100	0.0651309	0.0470979	2.59596	13.4494	0.051625	0.01782	0.190979	0.021181	0.155945	0.0257849	0.120918	0.979565	90100	0.211208
HC227	Mc	HC227_Mc_bin.30	21.6824	3.38237	5.85187	361.203	595406	1	1098	0.218615	0.0296041	-0.0985504	2.71822	0.22	0.159713	0.273288	0.1665	0.266575	0.17635	0.256	0.823096	60726	0.147553	0.0745876	1.32705	5.48484	0.132456	0.0460853	0.340955	0.0571635	0.295738	0.069938	0.245846	0.646878	1378	0.161335	0.0693172	0.436274	2.63875	0.151459	0.0496419	0.302895	0.0622653	0.284365	0.0782007	0.262366	0.646878	1378	0.272262
HC227	Mc	HC227_Mc_bin.31	100	8.15573	15.0815	0	412283	1	795	0.201131	0.0152821	0.0312229	3.09716	0.201	0.169	0.2305	0.1765	0.22715	0.182	0.221	0.986209	54285	0.0609803	0.0266022	1.55388	6.49685	0.054706	0.0276682	0.134579	0.0314804	0.112886	0.035455	0.0944916	0.941994	1596	0.0625128	0.0248075	0.809644	3.95598	0.059664	0.0233634	0.121857	0.0277375	0.110221	0.033808	0.0953855	0.941994	1596	0.202046
HC227	Mc	HC227_Mc_bin.32	100	84.7378	91.7385	0	2088647	1	4014	0.208295	0.0169762	-0.655291	4.1633	0.2095	0.169662	0.236838	0.1785	0.2335	0.187	0.2285	0.963312	1324378	0.0399814	0.0162551	1.74642	7.70895	0.036017	0.0202944	0.084096	0.022112	0.072322	0.024415	0.0605883	0.878566	38503	0.0625205	0.0289041	1.52812	7.11657	0.05677	0.0237135	0.134477	0.0277043	0.116636	0.0325094	0.099024	0.878566	38503	0.131665
HC227	Mc	HC227_Mc_bin.33	59.522	36.1973	45.0178	68.0052	3742638	1	6972	0.199252	0.0188923	0.0689958	3.73599	0.199	0.162	0.2365	0.1685	0.23	0.176	0.222	0.881932	2960961	0.0905221	0.0401161	1.48421	6.66885	0.081757	0.038872	0.191154	0.043428	0.167463	0.049443	0.143172	0.741605	70876	0.244274	0.107756	0.840542	3.93274	0.229406	0.081931	0.493487	0.0977818	0.441924	0.119001	0.388792	0.741605	70876	0.295341
HC227	Mc	HC227_Mc_bin.34	92.1714	69.1773	79.0359	8.49355	3351179	1	6418	0.209527	0.0181569	-0.380004	3.49228	0.211	0.169	0.2415	0.1765	0.2365	0.185	0.231	0.960911	3247426	0.0794767	0.0339103	1.99914	12.1056	0.071903	0.037179	0.162272	0.041077	0.142071	0.046087	0.122004	0.867745	90951	0.0450742	0.0283061	2.07628	9.70244	0.037685	0.013376	0.12073	0.0157585	0.0965905	0.018924	0.078733	0.867745	90951	0.222968
HC227	Mc	HC227_Mc_bin.35	36.1155	84.2762	50.5629	176.889	4861325	1	9144	0.141177	0.0169172	0.0277933	3.00827	0.141	0.1075	0.175	0.113	0.169	0.119	0.1625	0.902315	5586153	0.0270826	0.0177907	3.20822	19.145	0.023632	0.008159	0.070315	0.009498	0.053756	0.011531	0.043379	0.760719	147696	0.139455	0.0736968	0.704586	3.14485	0.127444	0.032082	0.305066	0.0399432	0.276267	0.052145	0.243451	0.760719	147696	0.216083
HC227	Mc	HC227_Mc_bin.36	100	95.3296	97.609	0	6778303	1	13453	0.289695	0.0125583	-0.197547	3.67886	0.29	0.265	0.3135	0.269	0.31	0.274	0.3055	0.99841	20953101	0.0526209	0.0275147	2.63162	14.7232	0.044762	0.024137	0.123792	0.026391	0.103664	0.029311	0.085151	0.99593	789396	0.0434383	0.0292002	1.9379	7.53997	0.03434	0.013078	0.126041	0.0152698	0.106188	0.018185	0.083321	0.99593	789396	0.234321
HC227	Mc	HC227_Mc_bin.37	99.2681	48.013	64.7219	0.737346	2766442	1	5378	0.342146	0.0140894	-1.22974	7.96506	0.3435	0.3125	0.365	0.319	0.362	0.3255	0.358	0.985022	2690040	0.0194446	0.0122839	7.08488	93.1994	0.016801	0.009133	0.045699	0.010036	0.035929	0.011188	0.028878	0.947527	83845	0.0282913	0.0142975	2.32669	13.5906	0.025442	0.0105302	0.0632527	0.012227	0.0531784	0.01449	0.0444706	0.947527	83845	0.149075
HC227	Mc	HC227_Mc_bin.38	20.3472	31.6916	24.7829	391.468	9089124	1	16353	0.226505	0.018495	-0.152949	3.00769	0.227	0.1895	0.2615	0.1955	0.2565	0.203	0.25	0.795017	9493903	0.128473	0.0509013	1.5253	6.47591	0.116686	0.063619	0.261904	0.06982	0.228802	0.07766	0.195039	0.498308	141246	0.0645601	0.0354325	2.24146	12.0723	0.05684	0.021977	0.151279	0.025795	0.12703	0.030789	0.105635	0.498308	141246	0.291225
HC227	Mc	HC227_Mc_bin.39	99.8995	46.9887	63.9146	0.10061	1550112	1	3089	0.249422	0.0194229	-1.06621	5.57277	0.2515	0.2041	0.28	0.2155	0.276	0.226	0.271	0.998995	1155960	0.112332	0.0532812	2.69218	13.2344	0.097638	0.059433	0.269911	0.064087	0.214498	0.06979	0.169157	0.998995	45150	0.0780756	0.031239	0.967211	4.42393	0.0731375	0.0315234	0.153149	0.0364944	0.137088	0.0428187	0.119617	0.998995	45150	0.239093
HC227	Mc	HC227_Mc_bin.3	69.4602	92.3285	79.2782	43.9674	10796483	1	20289	0.338253	0.0217459	-1.7532	9.31932	0.3415	0.285	0.3695	0.301	0.3655	0.314	0.3605	0.873897	29510403	0.0422038	0.0459447	6.02016	53.7852	0.031658	0.012205	0.150023	0.013831	0.098079	0.016171	0.068606	0.760315	873181	0.0717235	0.0445912	1.81804	8.80213	0.061332	0.019075	0.184677	0.022725	0.15473	0.027845	0.127014	0.760315	865270	0.16164
HC227	Mc	HC227_Mc_bin.40	99.8934	77.3617	87.1955	0.10669	1917203	1	3761	0.196103	0.0177812	-0.0141227	3.3683	0.1965	0.1605	0.23	0.166	0.224	0.173	0.218	0.996217	1437360	0.0733171	0.0340589	2.16276	10.4838	0.064996	0.033652	0.165918	0.037493	0.138121	0.042284	0.113586	0.979286	47895	0.085351	0.0448238	1.79977	8.02344	0.074936	0.0304114	0.205901	0.0354282	0.173995	0.042133	0.141128	0.979286	47895	0.177889
HC227	Mc	HC227_Mc_bin.41	100	56.931	72.5554	0	2810650	1	5296	0.170577	0.0120649	0.0681162	3.16535	0.1705	0.147	0.1945	0.151	0.190125	0.1555	0.186	0.947679	1770021	0.0316337	0.0129567	1.81733	8.05181	0.028478	0.016045	0.0670905	0.017501	0.057599	0.019351	0.047955	0.761154	35778	0.0950324	0.0394941	1.09402	4.96915	0.0883535	0.0378749	0.190755	0.0437537	0.169328	0.0514684	0.147672	0.761154	35778	0.231389
HC227	Mc	HC227_Mc_bin.42	23.2826	79.7179	36.0395	329.505	6761537	1	12822	0.188787	0.0157356	-0.14361	3.75856	0.189	0.1565	0.219	0.163	0.214	0.1695	0.208	0.919057	12110581	0.0707933	0.027506	1.24621	5.83663	0.06615	0.031118	0.137962	0.035343	0.121645	0.040877	0.105905	0.800205	345696	0.228842	0.106904	0.760323	3.58192	0.214225	0.063181	0.478824	0.07965	0.429448	0.103127	0.37396	0.800205	345696	0.334541
HC227	Mc	HC227_Mc_bin.43	50.2304	86.3826	63.523	99.0826	8134947	1	16144	0.303609	0.0168462	-0.361512	3.75772	0.304	0.268	0.335	0.2755	0.33	0.283	0.3245	0.994704	30322578	0.0564728	0.0293831	3.29446	21.5211	0.049706	0.025359	0.128878	0.028181	0.105279	0.031837	0.086193	0.992842	1148370	0.0615837	0.0316424	1.56019	6.93066	0.054842	0.020868	0.142716	0.024434	0.121677	0.029273	0.101739	0.992842	1148370	0.250556
HC227	Mc	HC227_Mc_bin.44	99.9334	94.6512	97.2206	0.0666427	2296244	1	4557	0.257001	0.0197338	-0.955754	5.4102	0.259	0.2095	0.29	0.2215	0.285	0.233	0.2795	0.999336	2390391	0.158284	0.0683205	1.77299	7.25181	0.140589	0.078502	0.348168	0.085495	0.297579	0.094422	0.24538	0.99655	88831	0.0837361	0.0442127	2.47104	14.3026	0.074698	0.0301158	0.193347	0.035247	0.158597	0.042077	0.131943	0.99655	88831	0.232871
HC227	Mc	HC227_Mc_bin.45	9.9173	7.6303	8.62477	908.339	9211216	1	16871	0.302256	0.0299046	0.182555	2.5283	0.2975	0.247	0.359	0.257	0.3535	0.268	0.346	0.847215	13543410	0.0993604	0.0564628	1.68067	8.07925	0.089221	0.014465	0.2461	0.022334	0.202322	0.043565	0.165384	0.599936	273430	0.152831	0.0714952	0.796841	3.98832	0.1439	0.0352117	0.320702	0.0490264	0.286555	0.069825	0.247949	0.599936	273430	0.344057
HC227	Mc	HC227_Mc_bin.46	46.8078	79.8824	59.0277	113.64	8594244	1	16891	0.302311	0.0266779	-1.14915	5.34151	0.3065	0.2375	0.343	0.252	0.3375	0.268	0.331	0.995325	29702778	0.054902	0.0586356	4.79554	33.0903	0.039032	0.017403	0.229655	0.019599	0.143033	0.022548	0.09052	0.975432	1021735	0.0377645	0.0203541	1.64074	7.31084	0.033328	0.012052	0.091218	0.01429	0.076765	0.017287	0.06334	0.975432	1021735	0.135933
HC227	Mc	HC227_Mc_bin.47	100	87.85	93.5321	0	2594414	1	5006	0.316357	0.0159302	-0.447229	5.3352	0.3165	0.285	0.3465	0.2905	0.341	0.297	0.3355	0.983569	2147628	0.0386497	0.0253106	5.54968	49.5469	0.033218	0.017668	0.0946113	0.019469	0.071254	0.021772	0.056393	0.918707	61075	0.0447106	0.0271301	3.01361	17.7039	0.038174	0.0162458	0.119594	0.0188565	0.0942764	0.0220844	0.0718256	0.918707	61075	0.164586
HC227	Mc	HC227_Mc_bin.48	99.7334	33.5135	50.1687	0.26736	1195038	1	2372	0.282905	0.0243648	-1.67642	7.09057	0.2875	0.2055	0.317362	0.237275	0.3125	0.256	0.307	0.992473	656085	0.129858	0.127703	2.43067	8.32749	0.082386	0.039797	0.552742	0.0443462	0.476783	0.05015	0.300034	0.992473	24753	0.0567382	0.0376407	2.07721	8.66739	0.046002	0.0166952	0.164944	0.0196066	0.134783	0.0239402	0.104006	0.992473	24753	0.243438
HC227	Mc	HC227_Mc_bin.49	100	97.1795	98.5696	0	3128210	1	6211	0.274698	0.0230751	-1.47663	7.30019	0.2785	0.2185	0.3085	0.234	0.304	0.248	0.2985	0.999064	4480521	0.112187	0.0943451	2.8715	12.4113	0.080344	0.039956	0.422562	0.044111	0.316687	0.049542	0.211991	0.999064	170236	0.0499462	0.0358303	2.96085	15.751	0.039938	0.015731	0.151308	0.0183785	0.117093	0.021885	0.08834	0.999064	170236	0.226283
HC227	Mc	HC227_Mc_bin.4	99.5749	86.7456	92.7186	0.426943	2686181	1	5334	0.278457	0.0155011	-0.272035	3.85547	0.279	0.2455	0.306837	0.252	0.302	0.259	0.297	0.997477	3296028	0.113705	0.0528203	2.10185	9.60234	0.100282	0.053587	0.2599	0.059102	0.21923	0.066049	0.177941	0.988055	123753	0.0922646	0.0499319	2.70639	17.0868	0.082258	0.0325474	0.212871	0.0382716	0.176672	0.0457862	0.146471	0.988055	123753	0.214145
HC227	Mc	HC227_Mc_bin.50	99.7935	27.8471	43.5435	0.206937	2480105	1	4932	0.30034	0.0144747	-0.863769	6.22227	0.3015	0.2675	0.3265	0.2765	0.3215	0.2845	0.3165	0.99403	2888406	0.0697931	0.0548249	7.08252	62.3873	0.059735	0.035233	0.152153	0.038372	0.116655	0.042225	0.093037	0.991765	112101	0.0829518	0.0475816	3.02236	17.4772	0.072604	0.030846	0.207182	0.035757	0.159687	0.042284	0.129103	0.991765	112101	0.21285
HC227	Mc	HC227_Mc_bin.51	99.9403	96.8054	98.3479	0.059699	3031990	1	6014	0.279617	0.0176647	-0.651497	5.00934	0.281	0.24	0.311	0.2485	0.3055	0.258	0.3	0.997891	4160170	0.0791039	0.0520979	2.3451	9.85126	0.061631	0.0314952	0.229191	0.034667	0.191961	0.03881	0.148009	0.982401	153735	0.0496083	0.0468784	3.44691	16.9956	0.035744	0.0145474	0.2157	0.0169337	0.133651	0.0200274	0.0898332	0.982401	153735	0.271976
HC227	Mc	HC227_Mc_bin.52	99.9598	96.5969	98.2496	0.0402405	3847534	1	7643	0.29241	0.0165259	-0.342368	3.81698	0.293	0.2575	0.324	0.265	0.318	0.272	0.3125	0.997245	6843150	0.0550405	0.0293121	3.7338	28.5347	0.047986	0.025534	0.125601	0.028066	0.103598	0.031316	0.084685	0.995094	263175	0.0345658	0.0218894	2.79447	14.9848	0.029126	0.011663	0.0948255	0.01358	0.0738813	0.016119	0.0574706	0.995094	263175	0.25378
HC227	Mc	HC227_Mc_bin.53	99.0492	93.8419	96.3752	0.959954	4315492	1	8481	0.23617	0.0230252	-1.05407	4.63796	0.24	0.178	0.2715	0.1905	0.2665	0.2055	0.261	0.991999	7494256	0.13495	0.0582744	1.78275	7.54812	0.119866	0.066035	0.293864	0.072384	0.2515	0.080255	0.209372	0.971914	260281	0.0633928	0.032248	2.33187	14.1179	0.056909	0.023335	0.140902	0.027132	0.119552	0.032054	0.100593	0.971914	260281	0.212077
HC227	Mc	HC227_Mc_bin.54	76.5632	93.774	84.2991	30.611	6351467	1	11325	0.360013	0.015885	-0.737524	4.48615	0.362	0.325	0.3865	0.332	0.383	0.3395	0.3785	0.71064	5946076	0.0207191	0.012414	1.90877	7.86137	0.016828	0.007699	0.054825	0.008581	0.046164	0.009752	0.037038	0.56687	161028	0.0454155	0.0315667	2.25399	10.0677	0.036314	0.012754	0.133669	0.015134	0.10761	0.018306	0.0840069	0.56687	83845	0.170725
HC227	Mc	HC227_Mc_bin.55	10.3439	94.8924	18.6544	866.75	59792908	1	113466	0.329161	0.0208126	-1.03477	5.86748	0.331	0.2795	0.3635	0.292	0.3585	0.3045	0.3525	0.898614	997905475	0.0517119	0.0411124	6.2714	65.0587	0.042632	0.018685	0.139168	0.021558	0.104918	0.025224	0.081067	0.80079	30619225	0.0854445	0.0407917	1.29208	6.89156	0.079076	0.025796	0.180885	0.031912	0.159242	0.040253	0.137625	0.80079	30611400	0.195266
HC227	Mc	HC227_Mc_bin.56	100	84.5043	91.6015	0	3215814	1	6102	0.290477	0.0212735	-1.13395	5.63284	0.293	0.2375	0.324	0.2515	0.3195	0.265	0.314	0.94241	2659971	0.0619691	0.0390832	3.18565	19.2288	0.050917	0.0253	0.164997	0.028001	0.132508	0.031506	0.103796	0.83015	69751	0.0718537	0.0349008	1.73395	8.80534	0.064658	0.02645	0.159673	0.0307755	0.136404	0.03652	0.114902	0.83015	69751	0.20767
HC227	Mc	HC227_Mc_bin.57	99.8548	89.3039	94.2851	0.145408	2395621	1	4721	0.337444	0.0142851	-0.391066	3.95534	0.338	0.3085	0.364	0.314	0.36	0.3195	0.355	0.995105	2416701	0.0284826	0.0139033	4.17683	34.9115	0.025699	0.013725	0.059416	0.015156	0.049754	0.01698	0.041602	0.986936	86320	0.0476364	0.0227904	1.70083	8.39533	0.043348	0.017317	0.103982	0.0203159	0.0884951	0.0242429	0.0751596	0.986936	85905	0.147183
HC227	Mc	HC227_Mc_bin.58	97.9218	94.1525	96.0002	2.12229	8198080	1	15925	0.295281	0.0157697	-0.48764	3.73033	0.2965	0.2595	0.3235	0.2665	0.319	0.275	0.3135	0.982267	23396220	0.0738486	0.0472105	2.29771	10.0676	0.057516	0.029718	0.206242	0.032501	0.169472	0.036157	0.134825	0.932626	729028	0.0603101	0.0368757	2.0507	8.93429	0.050155	0.019565	0.161887	0.02282	0.132616	0.027199	0.106638	0.932626	729028	0.236059
HC227	Mc	HC227_Mc_bin.59	11.1137	86.1805	19.6884	799.793	53487171	1	102738	0.271487	0.0275212	-0.717057	4.17372	0.274	0.206	0.3185	0.221	0.3115	0.2365	0.3035	0.941127	885047628	0.141277	0.0931592	2.12772	8.40306	0.112782	0.046567	0.422656	0.053949	0.342036	0.063501	0.257345	0.855749	27221131	0.0631493	0.031425	2.0891	13.231	0.057338	0.021863	0.140034	0.025968	0.119199	0.031413	0.10028	0.855749	27221131	0.220443
HC227	Mc	HC227_Mc_bin.5	42.4056	51.6633	46.5789	135.818	7740803	1	15174	0.338463	0.0175543	-0.754836	5.463	0.3395	0.3005	0.3695	0.3095	0.365	0.3175	0.359	0.994077	23225520	0.0281097	0.0196581	8.85247	137.479	0.024502	0.011975	0.064179	0.013417	0.050841	0.015302	0.0416321	0.960994	783126	0.0469595	0.0226174	1.16764	5.05381	0.042792	0.01557	0.102782	0.018417	0.089979	0.022269	0.0769275	0.960994	783126	0.137933
HC227	Mc	HC227_Mc_bin.60	100	46.3141	63.3078	0	3038899	1	5426	0.194352	0.0145883	-0.114207	3.38569	0.195	0.165	0.2225	0.17	0.2175	0.176	0.2125	0.785369	932295	0.052662	0.0254746	1.80092	7.64738	0.046486	0.02236	0.122157	0.02497	0.103213	0.028406	0.0845112	0.459459	11476	0.0887664	0.0481565	1.46566	5.50488	0.0766855	0.0289501	0.218889	0.0340985	0.190732	0.041107	0.154083	0.459459	11476	0.219377
HC227	Mc	HC227_Mc_bin.61	99.1379	72.3064	83.6226	0.869611	2474824	1	4851	0.20109	0.0139359	-0.0731332	3.18368	0.201	0.1735	0.228	0.178	0.2235	0.183	0.219	0.984821	2432115	0.0530395	0.0216326	3.52523	24.7374	0.048695	0.02913	0.102235	0.031602	0.086542	0.034675	0.073868	0.964509	84255	0.0563638	0.0258017	2.39372	15.5708	0.052202	0.0224887	0.114424	0.0259365	0.098493	0.030487	0.085096	0.964509	84255	0.264059
HC227	Mc	HC227_Mc_bin.62	99.7544	73.6287	84.7232	0.24622	2499685	1	4841	0.289133	0.019023	-1.01447	5.52714	0.2915	0.2455	0.32	0.2555	0.3155	0.266	0.3105	0.974161	2055378	0.0603809	0.0390892	3.56767	22.3213	0.049893	0.024895	0.16332	0.0275	0.123513	0.030908	0.0977343	0.914095	61776	0.0765731	0.0354106	1.45748	6.18253	0.069284	0.0293184	0.170277	0.0338515	0.145788	0.040093	0.121318	0.914095	61776	0.231665
HC227	Mc	HC227_Mc_bin.63	99.8887	38.1631	55.2266	0.111433	1981058	1	3878	0.211246	0.0145924	-0.330314	3.28984	0.212	0.18	0.2375	0.1855	0.234	0.192	0.2295	0.987544	1511191	0.0819614	0.0269871	1.32529	5.95806	0.076538	0.045032	0.149802	0.049008	0.133935	0.053928	0.117399	0.9566	50721	0.121292	0.0531566	1.03855	4.47762	0.111746	0.045057	0.249922	0.052657	0.221298	0.062453	0.192525	0.9566	50721	0.238703
HC227	Mc	HC227_Mc_bin.64	25.2616	63.3657	36.1225	295.858	30134265	1	53890	0.355666	0.0199258	-0.633506	4.63112	0.357	0.3125	0.391	0.3225	0.3855	0.331	0.3795	0.756852	116319378	0.0365959	0.0227483	4.37773	40.7989	0.032099	0.011717	0.087778	0.014174	0.070828	0.017586	0.057873	0.543046	2316628	0.109497	0.056668	0.469299	2.8614	0.104808	0.0193	0.230062	0.025496	0.209881	0.0365577	0.186676	0.543046	2168403	0.181812
HC227	Mc	HC227_Mc_bin.65	100	29.41	45.4524	0	3259340	1	6002	0.368352	0.0138903	-0.374213	3.20865	0.3695	0.3385	0.393	0.3435	0.389	0.35	0.385	0.908076	1576200	0.0143632	0.00478805	1.12778	5.19609	0.013539	0.007439	0.026071	0.008195	0.023412	0.009149	0.020668	0.595346	20100	0.0455544	0.0195956	0.973201	4.44165	0.0424795	0.016541	0.0913104	0.0193549	0.0820219	0.0233929	0.0717663	0.595346	18721	0.114392
HC227	Mc	HC227_Mc_bin.66	97.8587	84.4252	90.6469	2.18817	2648138	1	5257	0.286919	0.0282571	-0.914199	4.0943	0.2915	0.2172	0.3315	0.2325	0.325	0.248	0.3175	1	3201715	0.122466	0.101279	1.91368	7.09495	0.085216	0.029841	0.414178	0.03386	0.336815	0.039506	0.257785	1	121278	0.0659326	0.0418729	2.01121	9.17575	0.0544845	0.0193816	0.178647	0.0228149	0.145414	0.027493	0.118037	1	121278	0.172006
HC227	Mc	HC227_Mc_bin.67	100	89.2228	94.3045	0	2614608	1	5181	0.278855	0.0236796	-1.62803	7.92541	0.283	0.22	0.3125	0.2365	0.3075	0.25	0.303	0.997241	3044278	0.0813899	0.0675892	3.4895	19.0578	0.059642	0.030532	0.276379	0.033536	0.205597	0.037467	0.147551	0.997241	112575	0.0350742	0.0315917	4.24579	28.9041	0.026427	0.0102893	0.117937	0.012028	0.0882299	0.014385	0.0629162	0.997241	112575	0.181311
HC227	Mc	HC227_Mc_bin.68	100	77.7828	87.5032	0	2986518	1	5843	0.302227	0.0256212	-1.16653	5.37143	0.3065	0.237	0.341475	0.253	0.336	0.2695	0.33	0.987667	3352755	0.0715652	0.0621299	3.61594	22.0269	0.052847	0.0219248	0.252229	0.024821	0.181387	0.028796	0.13099	0.960393	113526	0.0507234	0.0280364	1.92873	8.47523	0.043865	0.017683	0.129335	0.0205772	0.107005	0.0244455	0.0849215	0.960393	113526	0.210128
HC227	Mc	HC227_Mc_bin.69	29.6195	93.5336	44.9915	237.615	28131046	1	48435	0.327379	0.0217415	-0.535879	3.81	0.3285	0.2805	0.3645	0.2905	0.36	0.3	0.354	0.612043	75995956	0.04487	0.0290591	6.39388	87.6306	0.039433	0.015193	0.106796	0.01825	0.085353	0.022224	0.069676	0.443335	1859556	0.0963661	0.0463561	1.34695	7.50508	0.0899545	0.029705	0.201194	0.03576	0.177711	0.04429	0.154546	0.443335	1859556	0.264754
HC227	Mc	HC227_Mc_bin.6	99.4452	11.6948	20.9285	0.557858	805731	1	1094	0.338323	0.0166662	-0.326055	3.39986	0.3385	0.305	0.369	0.311	0.365	0.317	0.3605	0.00638427	0	NA	NA	NA	NA	NA	NA	NA	NA	NA	NA	NA	-1	1	1	NA	NA	NA	1	1	1	1	1	1	1	-1	1	1
HC227	Mc	HC227_Mc_bin.70	100	91.6525	95.6445	0	1674386	1	3337	0.189198	0.0214734	0.214703	3.54945	0.1885	0.1482	0.2328	0.154	0.2235	0.163	0.2155	1	1342341	0.0394791	0.0255297	3.10078	18.6893	0.032134	0.015335	0.106241	0.017021	0.084932	0.019259	0.066859	1	52326	0.0456914	0.0391241	3.47441	19.7687	0.033974	0.0136942	0.15553	0.015852	0.121322	0.0187605	0.0844125	1	52326	0.121604
HC227	Mc	HC227_Mc_bin.71	100	97.0517	98.5038	0	4557698	1	9057	0.249092	0.0187277	-1.22981	6.53095	0.2515	0.203	0.279	0.2165	0.275	0.2275	0.2695	0.998938	9572500	0.0925761	0.0636183	2.84808	12.6367	0.073605	0.037695	0.309113	0.041523	0.223804	0.046533	0.152699	0.992623	363378	0.0351819	0.0353935	4.08031	23.3103	0.025757	0.009575	0.15152	0.011233	0.0854893	0.013468	0.0578243	0.992623	363378	0.228802
HC227	Mc	HC227_Mc_bin.72	99.5801	92.4076	95.8599	0.421626	5161721	1	9955	0.340131	0.0145943	-1.06868	7.044	0.3415	0.309425	0.365	0.316	0.3615	0.323	0.3565	0.968211	8472786	0.0288504	0.0187879	4.99455	44.9559	0.024337	0.012575	0.071247	0.013865	0.056279	0.015535	0.044767	0.907524	252405	0.0336776	0.0188019	1.86065	8.01969	0.029151	0.0112821	0.085769	0.013221	0.0711328	0.015793	0.056679	0.907524	252405	0.147659
HC227	Mc	HC227_Mc_bin.73	99.8625	85.2523	91.9809	0.137678	3786435	1	7524	0.302475	0.0241105	-0.816824	5.6521	0.304	0.25	0.345	0.2615	0.338925	0.273	0.331	0.997108	6666726	0.0696078	0.0591657	3.85661	25.3639	0.051735	0.022884	0.232973	0.025799	0.174582	0.02965	0.127089	0.997108	255970	0.0442998	0.0304455	2.60369	13.3697	0.035869	0.013267	0.129477	0.015625	0.101777	0.018742	0.078716	0.997108	255970	0.246079
HC227	Mc	HC227_Mc_bin.74	100	93.4021	96.5885	0	4146389	1	8136	0.297388	0.0213998	-1.52461	8.32167	0.3	0.2475	0.33	0.261	0.3255	0.273	0.32	0.998695	6784086	0.0716901	0.0602409	5.18496	38.3309	0.05696	0.028903	0.209359	0.031928	0.14489	0.035879	0.110342	0.979887	228826	0.0650663	0.0290496	1.36764	6.20879	0.059579	0.0250446	0.138221	0.0290502	0.119962	0.034292	0.10235	0.979887	228826	0.161855
HC227	Mc	HC227_Mc_bin.75	96.9557	57.6838	72.3331	3.13984	2877010	1	5466	0.318818	0.0142656	-0.92219	6.82815	0.3195	0.289312	0.343687	0.295	0.34	0.302	0.3355	0.947817	2133145	0.0314118	0.014965	4.16006	36.4032	0.028402	0.015282	0.065893	0.016847	0.054685	0.018837	0.045782	0.841334	53301	0.0417304	0.0196836	1.93512	10.4066	0.038035	0.015977	0.089454	0.018518	0.07647	0.02181	0.064945	0.841334	53301	0.191994
HC227	Mc	HC227_Mc_bin.76	9.46627	82.47	16.9831	956.382	74376590	1	141509	0.318968	0.0202727	-0.527631	4.94943	0.3195	0.2765	0.3565	0.286	0.3505	0.295	0.344	0.888482	1673455878	0.0589883	0.0389065	5.06362	53.5376	0.049615	0.021981	0.145098	0.025065	0.118824	0.02898	0.096847	0.81837	56005236	0.113611	0.063082	1.20016	4.78851	0.09913	0.031188	0.269848	0.037829	0.237928	0.047071	0.201909	0.81837	56005236	0.243848
HC227	Mc	HC227_Mc_bin.77	100	95.8678	97.8903	0	1624405	1	3184	0.194433	0.0164658	-0.390776	3.53425	0.1955	0.1565	0.2245	0.164575	0.220925	0.174	0.2145	0.991309	1023165	0.0332627	0.0184504	2.60627	14.0938	0.027989	0.01449	0.0819729	0.015968	0.069155	0.01786	0.0556976	0.957503	34453	0.0408237	0.0374381	6.01347	51.034	0.032462	0.0133822	0.107777	0.0155352	0.0851564	0.0183402	0.06603	0.957503	34453	0.111662
HC227	Mc	HC227_Mc_bin.78	99.7553	74.0401	84.9952	0.245299	2711660	1	5346	0.21279	0.0193122	0.00595511	3.36285	0.2125	0.1745	0.2495	0.1815	0.2445	0.189	0.2375	0.990439	3116256	0.0646087	0.0347864	3.3948	24.9217	0.0551005	0.030332	0.153295	0.033128	0.12752	0.036664	0.103171	0.982427	112101	0.0955354	0.0394852	1.14241	5.27886	0.089094	0.037971	0.19159	0.044074	0.168623	0.052059	0.14662	0.982427	112101	0.16103
HC227	Mc	HC227_Mc_bin.79	37.9151	90.9402	53.5175	163.747	15736121	1	29608	0.285875	0.0193188	-0.799213	5.10442	0.288	0.241	0.319	0.2515	0.3135	0.262	0.30715	0.857352	64803420	0.0993665	0.0607246	2.59589	12.4816	0.082941	0.038097	0.277025	0.042564	0.214905	0.048829	0.165034	0.739745	2075703	0.107033	0.0577802	1.15237	4.86788	0.096686	0.0276966	0.251625	0.033767	0.219872	0.042903	0.185011	0.739745	2075703	0.291365
HC227	Mc	HC227_Mc_bin.7	99.8505	80.0487	88.8598	0.149763	2815315	1	5587	0.30311	0.0137024	-1.12683	7.3027	0.3045	0.272	0.326	0.2795	0.3225	0.287	0.318	0.998505	3627471	0.0511324	0.0179032	2.10461	12.1973	0.047812	0.027934	0.0947753	0.030359	0.0822875	0.033426	0.071668	0.998505	137550	0.0672668	0.029363	1.47472	7.16541	0.062071	0.0264505	0.14023	0.030835	0.12073	0.036179	0.103702	0.998505	137550	0.205418
HC227	Mc	HC227_Mc_bin.80	99.7391	91.7529	95.5794	0.2616	3502273	1	6941	0.227634	0.0156269	-0.534743	4.87217	0.2285	0.1935	0.257	0.202	0.252	0.209	0.2465	0.992155	5546115	0.098751	0.0400234	2.35142	12.1459	0.089012	0.053134	0.203758	0.057427	0.173276	0.06284	0.145197	0.990183	209628	0.0794026	0.0404041	2.66035	15.3822	0.071668	0.030493	0.17552	0.035437	0.14424	0.0418137	0.121172	0.990183	209628	0.252328
HC227	Mc	HC227_Mc_bin.81	99.9016	82.6251	90.4457	0.0985296	1696615	1	3314	0.198333	0.0163513	0.479145	5.8092	0.1985	0.166	0.229	0.1725	0.2225	0.178	0.217	0.9943	1075311	0.0579857	0.0452675	5.30406	41.4396	0.046669	0.025639	0.165555	0.028107	0.121062	0.031243	0.088923	0.967913	35778	0.0496116	0.0312391	2.38014	11.3045	0.041127	0.016598	0.138053	0.0192577	0.111132	0.0228175	0.085944	0.967913	35778	0.173532
HC227	Mc	HC227_Mc_bin.82	99.9189	99.7659	99.8424	0.0811498	2008905	1	3989	0.297343	0.0186371	-1.5166	9.05328	0.3	0.2535	0.3245	0.2655	0.3205	0.275	0.3165	0.996797	1855701	0.0778545	0.0674573	4.7083	32.6065	0.059459	0.029827	0.24455	0.033003	0.174539	0.037116	0.12763	0.996797	70876	0.061978	0.0372948	2.53121	13.5179	0.0532965	0.0202749	0.16385	0.0238527	0.130329	0.028642	0.102436	0.996797	70876	0.244361
HC227	Mc	HC227_Mc_bin.83	99.1008	97.4256	98.2561	0.907335	4643372	1	9177	0.323798	0.0130642	-0.912583	5.85534	0.325	0.294	0.3455	0.3015	0.3425	0.308	0.3385	0.980932	9633855	0.0329907	0.014655	5.4629	75.174	0.029892	0.017745	0.06897	0.019259	0.057061	0.021148	0.046987	0.972255	366796	0.0509446	0.021789	1.319	6.26687	0.047266	0.019967	0.103744	0.023156	0.090962	0.027369	0.0785535	0.972255	366796	0.197958
HC227	Mc	HC227_Mc_bin.84	99.1613	74.9072	85.3445	0.84575	3003677	1	5924	0.197634	0.0178349	-0.182577	6.38516	0.199	0.156037	0.2275	0.1665	0.222925	0.176	0.2175	0.98726	3862810	0.0691263	0.0473628	5.80902	56.1073	0.057503	0.030996	0.173112	0.03405	0.13797	0.037879	0.108249	0.982389	140185	0.117729	0.055917	1.859	9.80807	0.106935	0.0442636	0.255428	0.0516318	0.218005	0.061088	0.184752	0.982389	140185	0.283724
HC227	Mc	HC227_Mc_bin.85	99.3959	94.0147	96.6305	0.60775	3133997	1	6194	0.237396	0.0206163	-1.09141	5.54617	0.24	0.183	0.27	0.1985	0.265	0.2135	0.2595	0.996953	4293915	0.198019	0.064832	1.26407	5.72202	0.185614	0.106642	0.362295	0.117964	0.322377	0.130763	0.282084	0.994738	155961	0.121083	0.0544898	1.21226	4.87693	0.110278	0.045811	0.262526	0.053287	0.231003	0.063206	0.19439	0.994738	155961	0.228403
HC227	Mc	HC227_Mc_bin.86	34.0841	54.8693	42.0484	193.392	9923345	1	18711	0.316811	0.0217959	-1.14402	5.59559	0.32	0.2625	0.351	0.276	0.346	0.29	0.3405	0.8611	28414491	0.0503331	0.0461853	5.93953	52.5655	0.039648	0.017343	0.153021	0.019726	0.107894	0.022987	0.079316	0.80263	957036	0.0513239	0.0285446	2.05585	11.5479	0.046146	0.014945	0.120512	0.017996	0.101412	0.022372	0.08452	0.80263	957036	0.178945
HC227	Mc	HC227_Mc_bin.87	100	6.32852	11.9037	0	240789	1	475	0.268207	0.0290956	-0.559281	3.30763	0.271	0.202425	0.315075	0.21635	0.3105	0.2299	0.3035	1	23871	0.131549	0.0722899	1.46026	5.636	0.110733	0.0446125	0.320466	0.0538475	0.277923	0.063743	0.231353	0.977902	820	0.0578913	0.0241281	0.665845	3.34983	0.0550995	0.0187846	0.113432	0.0229063	0.102195	0.029276	0.0903503	0.977902	820	0.235977
HC227	Mc	HC227_Mc_bin.88	100	92.2217	95.9535	0	6313378	1	12341	0.231108	0.0177758	-0.629989	3.66469	0.233	0.1895	0.261	0.198	0.2565	0.208	0.2515	0.992369	14985075	0.109855	0.0491667	2.64741	13.9911	0.097197	0.057681	0.243999	0.06226	0.200491	0.068101	0.164046	0.963578	489555	0.0397882	0.0464263	8.08949	86.5049	0.030424	0.012755	0.125889	0.014769	0.0869863	0.017383	0.0609376	0.963578	489555	0.14636
HC227	Mc	HC227_Mc_bin.89	58.5453	87.5414	70.1657	70.8079	8703656	1	16192	0.205494	0.0172764	-0.478722	3.63029	0.207	0.1665	0.236	0.1745	0.231	0.183	0.226	0.879209	15293215	0.092212	0.0413386	1.57638	7.41088	0.083884	0.037472	0.194328	0.042724	0.16763	0.049626	0.143769	0.678118	364231	0.0992321	0.0568631	1.38516	5.68514	0.085574	0.028476	0.241867	0.0338655	0.210274	0.04112	0.175814	0.678118	364231	0.240533
HC227	Mc	HC227_Mc_bin.8	28.8102	79.9928	42.363	247.099	16848350	1	31622	0.347476	0.0180199	-0.798383	5.89842	0.3485	0.308762	0.3795	0.3185	0.3745	0.326	0.369	0.880565	68462551	0.0322447	0.0159294	2.50344	19.2844	0.029769	0.011432	0.068368	0.013227	0.058909	0.015847	0.05029	0.753187	1955253	0.0906388	0.0475996	0.59101	3.42276	0.08758	0.018178	0.192202	0.02268	0.173228	0.029938	0.153215	0.753187	1949325	0.171361
HC227	Mc	HC227_Mc_bin.90	99.9574	74.5257	85.3882	0.0425958	6566054	1	12225	0.312176	0.0117798	-0.380026	3.99059	0.3125	0.287	0.3335	0.292	0.3305	0.2975	0.3265	0.891435	8563591	0.0396063	0.0133734	1.17449	4.96434	0.036942	0.0210478	0.0731192	0.022926	0.065539	0.025334	0.057568	0.700638	191271	0.0584715	0.0279142	1.30288	5.48079	0.052497	0.021118	0.129018	0.024664	0.113392	0.029241	0.096225	0.700638	191271	0.22863
HC227	Mc	HC227_Mc_bin.91	98.7087	68.3308	80.7575	1.30819	1685522	1	3312	0.197517	0.0155916	-0.477367	3.94483	0.1985	0.163387	0.2235	0.170275	0.2205	0.1775	0.2165	0.994928	1140805	0.0626779	0.0296136	4.79902	46.3628	0.056424	0.032152	0.127761	0.035215	0.108424	0.038966	0.091264	0.989113	39060	0.0707746	0.0422797	2.53571	12.3962	0.060821	0.0245184	0.19335	0.0286949	0.149141	0.0340849	0.114244	0.989113	39060	0.226196
HC227	Mc	HC227_Mc_bin.92	100	95.6648	97.7844	0	2688739	1	5350	0.23642	0.015017	-0.615595	4.66619	0.2375	0.2035	0.263138	0.210725	0.2585	0.21795	0.254	1	3381300	0.135352	0.0514015	1.54368	6.52306	0.12315	0.069961	0.269885	0.076496	0.237193	0.084656	0.203154	0.993903	128271	0.107774	0.047827	1.3672	5.84536	0.098467	0.0423613	0.231538	0.049135	0.200892	0.057657	0.169393	0.993903	128271	0.284359
HC227	Mc	HC227_Mc_bin.93	99.7418	95.1546	97.3942	0.258858	4275756	1	8458	0.248967	0.0179065	-0.926739	5.67562	0.2505	0.207	0.279	0.2175	0.274075	0.228	0.269	0.998514	7998000	0.105198	0.0467936	2.64535	14.8102	0.093541	0.054109	0.229691	0.058741	0.190709	0.064619	0.157114	0.993879	292230	0.0243026	0.0141257	3.80956	32.2792	0.021373	0.008753	0.0579338	0.010207	0.047111	0.012069	0.038607	0.993879	292230	0.166425
HC227	Mc	HC227_Mc_bin.94	74.2692	3.83036	7.28501	34.6453	224047	1	422	0.336089	0.0209929	-0.489981	4.11762	0.337	0.292787	0.3705	0.2995	0.368	0.30955	0.361	0.842386	13861	0.037774	0.0199844	0.812266	3.2726	0.034114	0.0097105	0.084895	0.012425	0.076814	0.015478	0.067069	0.819364	465	0.0581386	0.0336774	0.957629	3.56015	0.052065	0.0118822	0.144147	0.0152156	0.125292	0.020837	0.107803	0.819364	465	0.163648
HC227	Mc	HC227_Mc_bin.95	99.9125	92.0754	95.834	0.0875965	2350084	1	4628	0.263907	0.0198229	-1.11246	5.64112	0.2665	0.213838	0.296	0.227	0.291	0.24	0.2855	0.992418	2295153	0.147394	0.0663007	1.88225	8.13387	0.131454	0.0682418	0.331271	0.075595	0.277932	0.0850312	0.228114	0.970172	81406	0.116448	0.0543221	1.22884	5.22802	0.105714	0.0416704	0.252828	0.0488413	0.221243	0.0583835	0.188753	0.970172	81406	0.269494
HC227	Mc	HC227_Mc_bin.96	97.1162	84.0138	90.0911	2.96942	2470379	1	4841	0.223846	0.0201491	-1.23887	5.05995	0.2275	0.1695	0.253	0.181	0.249	0.197	0.2445	0.991659	2379471	0.110916	0.0392482	1.44679	6.67399	0.102603	0.056953	0.211905	0.06412	0.187554	0.071665	0.162154	0.980778	81406	0.0728864	0.0384275	2.71709	15.3374	0.065262	0.0276905	0.167624	0.0321722	0.134245	0.0378955	0.111724	0.980778	81406	0.212859
HC227	Mc	HC227_Mc_bin.97	100	86.6503	92.8477	0	2067752	1	3971	0.248655	0.0226901	-0.584719	3.87483	0.2505	0.197	0.288	0.208	0.2825	0.2195	0.2755	0.967748	1266436	0.0865345	0.0442044	2.35609	11.6422	0.074878	0.0389149	0.206038	0.042774	0.168892	0.047755	0.137623	0.88949	34980	0.0588478	0.0377886	3.03665	16.449	0.0503035	0.0200069	0.16314	0.023343	0.120187	0.0276546	0.094088	0.88949	34980	0.157994
HC227	Mc	HC227_Mc_bin.98	99.8895	42.0758	59.2107	0.110637	1383530	1	2755	0.264206	0.0267901	-0.771794	3.697	0.268	0.199425	0.3075	0.21285	0.3015	0.228	0.2945	0.998895	906531	0.182552	0.103089	1.52359	5.64493	0.154669	0.0623722	0.463307	0.071693	0.398469	0.08399	0.324603	0.998895	34453	0.086238	0.0496793	1.54632	6.89611	0.074463	0.0242354	0.208505	0.0292192	0.181142	0.0360544	0.151926	0.998895	34453	0.272358
HC227	Mc	HC227_Mc_bin.99	100	58.9352	74.1626	0	2720584	1	5029	0.291493	0.0219165	-0.826225	4.06899	0.295	0.2395	0.326	0.25	0.3215	0.2625	0.316	0.884563	1279200	0.086301	0.0557516	1.97665	8.74152	0.068807	0.029063	0.238566	0.032467	0.195266	0.037053	0.157592	0.671773	25425	0.0630001	0.0307483	1.2954	5.11624	0.055496	0.0228452	0.1429	0.0265474	0.125911	0.0314724	0.105999	0.671773	25425	0.230304
HC227	Mc	HC227_Mc_bin.9	36.6497	98.4113	53.4092	172.853	6793646	1	12078	0.140926	0.0167976	-0.102934	3.05956	0.1415	0.107	0.172	0.113	0.1675	0.1185	0.1625	0.702195	6739956	0.0289747	0.0177206	1.9803	9.57556	0.024707	0.008474	0.074453	0.009872	0.060559	0.011904	0.0499	0.538191	184528	0.166898	0.0886526	0.541737	2.83418	0.160523	0.0371842	0.359296	0.0452174	0.324954	0.0574577	0.28697	0.538191	183921	0.21773
HC227	Mcc	HC227_Mcc_bin.100	90.5084	28.4636	43.3076	10.4869	4095926	1	6866	0.345779	0.0178555	-1.05647	6.00737	0.348	0.303812	0.375	0.314	0.371	0.324	0.366	0.544945	671061	0.0300684	0.0153699	1.35305	5.49165	0.026386	0.0109105	0.069223	0.012362	0.059962	0.014348	0.05069	0.252511	6786	0.0700215	0.0353074	1.01459	4.41982	0.063829	0.0199085	0.154857	0.0248765	0.135724	0.03085	0.117564	0.252511	6670	0.156069
HC227	Mcc	HC227_Mcc_bin.101	98.8129	85.068	91.4267	1.20132	1794575	1	3510	0.196534	0.0168261	-0.55964	3.57816	0.1975	0.1575	0.225	0.1655	0.2215	0.1745	0.2165	0.996463	1206681	0.075332	0.0330705	2.02597	9.71485	0.067507	0.035837	0.161922	0.039647	0.137704	0.044412	0.114866	0.960587	39903	0.119317	0.0629042	1.2266	4.58909	0.103974	0.0384236	0.279736	0.0453273	0.247532	0.0544502	0.20813	0.960587	39903	0.262773
HC227	Mcc	HC227_Mcc_bin.102	100	97.1795	98.5696	0	3125281	1	6207	0.274691	0.0230782	-1.47648	7.29838	0.2785	0.2185	0.3085	0.234	0.304	0.2478	0.2985	1	4480521	0.112187	0.0943451	2.8715	12.4113	0.080344	0.039956	0.422562	0.044111	0.316687	0.049542	0.211991	1	170236	0.0499462	0.0358303	2.96085	15.751	0.039938	0.015731	0.151308	0.0183785	0.117093	0.021885	0.08834	1	170236	0.226283
HC227	Mcc	HC227_Mcc_bin.103	98.8299	89.2854	93.8155	1.18396	5185765	1	10293	0.296039	0.0227807	-1.09025	4.75597	0.3	0.238	0.33	0.2495	0.3255	0.2655	0.3205	0.999098	12268581	0.0643125	0.0699709	3.00156	12.5973	0.039405	0.019605	0.301868	0.021665	0.234096	0.024371	0.135715	0.995568	462241	0.0453437	0.0447926	3.27809	15.4646	0.031493	0.012295	0.193794	0.014316	0.135341	0.016975	0.085495	0.995568	462241	0.157153
HC227	Mcc	HC227_Mcc_bin.104	100	91.536	95.581	0	2471364	1	4871	0.337449	0.0143823	-0.369695	3.90626	0.338	0.308	0.3645	0.314	0.36	0.3195	0.3555	0.994823	2554930	0.0290956	0.0141573	3.84807	31.0446	0.026138	0.013809	0.061041	0.015258	0.05172	0.017113	0.043296	0.981477	90525	0.04839	0.0231325	1.65118	8.06597	0.043915	0.0176381	0.105771	0.0206642	0.0903556	0.02458	0.0768894	0.981477	90100	0.149744
HC227	Mcc	HC227_Mcc_bin.105	90.0246	40.6536	56.0127	11.0807	2105286	1	4169	0.32222	0.0234664	-1.05117	4.66963	0.3255	0.2601	0.3585	0.273	0.3535	0.2935	0.348	0.999143	1971105	0.0509479	0.0622713	3.6212	17.9081	0.029931	0.014048	0.248768	0.015607	0.175295	0.017707	0.102285	0.992067	72771	0.0574885	0.0432644	2.57062	11.5985	0.044602	0.0160383	0.190715	0.018968	0.13903	0.022958	0.10575	0.992067	72771	0.165138
HC227	Mcc	HC227_Mcc_bin.106	99.3749	97.8401	98.6015	0.629035	6257955	1	12406	0.307744	0.0144124	-0.758053	4.60714	0.3095	0.274	0.331937	0.2815	0.328	0.2895	0.324	0.995962	17585415	0.0396721	0.0201995	2.25663	10.5366	0.033747	0.018552	0.09702	0.020259	0.0812253	0.022457	0.064844	0.986944	654940	0.0563109	0.0317291	2.0559	9.94718	0.0484015	0.019422	0.140948	0.022595	0.118228	0.026743	0.095547	0.986944	654940	0.214328
HC227	Mcc	HC227_Mcc_bin.107	100	91.3926	95.5027	0	1962493	1	3901	0.226925	0.0182862	-0.767274	4.30736	0.229	0.184	0.2575	0.194	0.253	0.204	0.248	1	1779441	0.0672128	0.0349037	2.23577	10.0923	0.057116	0.031089	0.167776	0.033883	0.13827	0.037466	0.109075	1	67896	0.0319888	0.0253235	3.71803	21.1624	0.025668	0.00991538	0.101998	0.01159	0.0691738	0.0139015	0.0526565	1	67896	0.141857
HC227	Mcc	HC227_Mcc_bin.108	90.1176	77.2081	83.1649	10.9661	4516668	1	8712	0.260171	0.0218361	-1.05012	4.84035	0.2635	0.204	0.294	0.218	0.289	0.232	0.284	0.966298	6367096	0.127119	0.0645145	2.24408	10.3005	0.109285	0.057499	0.307563	0.063488	0.254738	0.071106	0.204917	0.865721	187578	0.0446564	0.0218303	1.95386	9.78714	0.040388	0.0168144	0.100554	0.0194837	0.0833278	0.0229887	0.0698173	0.865721	187578	0.197812
HC227	Mcc	HC227_Mcc_bin.109	100	27.8471	43.5631	0	2468659	1	4917	0.300336	0.0144857	-0.863501	6.21973	0.3015	0.2675	0.3265	0.2765	0.3215	0.2845	0.3165	0.998639	2888406	0.0697931	0.0548249	7.08252	62.3873	0.059735	0.035233	0.152153	0.038372	0.116655	0.042225	0.093037	0.996364	112101	0.0829518	0.0475816	3.02236	17.4772	0.072604	0.030846	0.207182	0.035757	0.159687	0.042284	0.129103	0.996364	112101	0.21285
HC227	Mcc	HC227_Mcc_bin.10	100	95.1199	97.4989	0	6759971	1	13422	0.289656	0.0125304	-0.204362	3.68331	0.29	0.265	0.3135	0.269	0.3095	0.274	0.3055	0.999415	20907811	0.0525881	0.0274926	2.63262	14.722	0.044735	0.024134	0.123711	0.026386	0.103596	0.029304	0.085091	0.996928	788140	0.0434108	0.0291898	1.93861	7.53995	0.0343125	0.013073	0.126	0.015264	0.10616	0.018177	0.0832891	0.996928	788140	0.234307
HC227	Mcc	HC227_Mcc_bin.110	51.2296	81.0539	62.7797	95.1997	7916360	1	15443	0.227206	0.0142399	-0.497348	4.11881	0.228	0.1965	0.2525	0.2035	0.2485	0.2095	0.2445	0.991645	22818390	0.146674	0.0468004	1.21155	5.34457	0.137788	0.081093	0.263045	0.087955	0.236283	0.096633	0.208526	0.954269	736291	0.0980499	0.0437092	1.1178	5.02633	0.090839	0.034942	0.204897	0.041217	0.179889	0.049586	0.155082	0.954269	736291	0.288822
HC227	Mcc	HC227_Mcc_bin.111	100	57.2445	72.8096	0	1673240	1	3000	0.143423	0.0134842	0.0867027	2.88002	0.143	0.117987	0.169513	0.1215	0.166	0.126	0.1615	0.797007	310866	0.0183577	0.00862921	1.7122	7.49921	0.016195	0.00795863	0.0408924	0.008871	0.0353407	0.010049	0.0295995	0.475549	4371	0.0536337	0.0361347	1.81056	6.43101	0.041858	0.0159763	0.158398	0.0188925	0.13708	0.022576	0.103247	0.475549	4371	0.138576
HC227	Mcc	HC227_Mcc_bin.112	100	19.3446	32.4181	0	340983	1	674	0.146355	0.0162271	0.162266	2.87615	0.14575	0.1165	0.176588	0.121325	0.171675	0.12665	0.1685	1	49455	0.0236076	0.015661	2.3153	12.3675	0.018961	0.007327	0.0622747	0.0085344	0.0529044	0.009969	0.043442	1	1770	0.0837435	0.0408472	1.02412	4.11077	0.076746	0.0265894	0.189583	0.0316849	0.166988	0.039415	0.137956	1	1770	0.170639
HC227	Mcc	HC227_Mcc_bin.113	100	77.9349	87.5993	0	2140086	1	4229	0.209998	0.015921	-0.291961	3.39251	0.21	0.1755	0.2395	0.1835	0.235	0.19	0.23	1	1981045	0.0633124	0.0279236	1.89845	8.50165	0.055955	0.031116	0.138384	0.033915	0.119024	0.037491	0.099084	0.992778	71631	0.107164	0.0558243	1.80995	7.83039	0.094381	0.0385715	0.260458	0.045212	0.216144	0.053256	0.175045	0.992778	71631	0.165791
HC227	Mcc	HC227_Mcc_bin.114	100	86.1654	92.5686	0	3069735	1	5886	0.335446	0.0180987	-0.909206	7.56628	0.336	0.299	0.3675	0.3065	0.3625	0.3145	0.357	0.966423	2690040	0.0288504	0.0171	4.43901	39.1298	0.024568	0.012733	0.070093	0.014073	0.057779	0.015788	0.04556	0.866898	72010	0.0799058	0.0365996	1.16113	4.84176	0.072564	0.0293282	0.171021	0.0341824	0.151111	0.040555	0.12969	0.866898	72010	0.121225
HC227	Mcc	HC227_Mcc_bin.115	65.6775	3.52165	6.68485	52.2591	333862	1	642	0.299376	0.0249785	-0.295565	3.1765	0.30275	0.246012	0.345	0.253525	0.336475	0.266	0.32695	0.940077	34716	0.0795713	0.0477627	1.23486	4.80204	0.067811	0.0206855	0.196721	0.0248993	0.172264	0.029974	0.148082	0.823427	1035	0.126368	0.0661215	0.965394	3.76456	0.112812	0.0312486	0.296196	0.0439424	0.2576	0.0544494	0.216387	0.823427	1035	0.291987
HC227	Mcc	HC227_Mcc_bin.116	100	96.0165	97.9678	0	3921178	1	7789	0.283711	0.0155941	-1.50885	9.03723	0.2855	0.2475	0.3075	0.257	0.3045	0.265	0.3005	1	7081966	0.0802827	0.050594	4.82478	39.0717	0.06788	0.038491	0.212613	0.041927	0.158724	0.04632	0.11989	0.996021	266815	0.0567024	0.0299891	2.32511	11.9399	0.050125	0.021143	0.134794	0.024491	0.110008	0.028879	0.0899282	0.996021	266815	0.233133
HC227	Mcc	HC227_Mcc_bin.117	100	23.9475	38.6413	0	786566	1	1563	0.281822	0.0208941	-0.366165	4.07524	0.283	0.237	0.323975	0.24705	0.31695	0.2555	0.307	1	287661	0.117416	0.0706607	1.98022	7.82358	0.094914	0.044772	0.323918	0.050678	0.268827	0.05771	0.209784	1	10878	0.0861096	0.0794429	2.12229	7.76914	0.0562465	0.0198935	0.315988	0.0232501	0.273759	0.0280214	0.211617	1	10878	0.213753
HC227	Mcc	HC227_Mcc_bin.118	96.6171	87.0918	91.6075	3.50134	5010809	1	9930	0.314247	0.0153655	-1.09175	7.08406	0.3155	0.2795	0.34	0.288	0.336	0.296	0.3315	0.98969	11369296	0.0396593	0.0335176	8.80412	115.876	0.032609	0.017528	0.094331	0.019217	0.075142	0.021392	0.060073	0.985694	430128	0.0785006	0.0432167	2.51959	14.9133	0.069035	0.0278022	0.185441	0.032357	0.154443	0.038383	0.127234	0.985694	430128	0.235092
HC227	Mcc	HC227_Mcc_bin.119	100	92.0979	95.8864	0	2587053	1	5133	0.188166	0.0155761	-0.39562	3.48573	0.189	0.154	0.216	0.161	0.212	0.1685	0.2075	1	3024570	0.0520647	0.0214713	1.61754	7.00074	0.046873	0.025359	0.108402	0.027863	0.094157	0.031044	0.079959	0.996441	112575	0.195423	0.0864327	1.20065	4.91394	0.178914	0.0747797	0.419696	0.0868795	0.366807	0.10288	0.309321	0.996441	112575	0.237369
HC227	Mcc	HC227_Mcc_bin.11	100	8.24393	15.2321	0	339507	1	673	0.303746	0.0376764	-1.22738	4.05747	0.3135	0.2089	0.3515	0.2236	0.346	0.2383	0.3399	1	51681	0.147535	0.1733	1.82968	5.03191	0.070745	0.022663	0.629809	0.02669	0.598364	0.032057	0.496392	0.981111	1891	0.0831945	0.0409859	0.635043	2.79211	0.076557	0.0235938	0.173814	0.028376	0.161142	0.035785	0.142273	0.981111	1891	0.19855
HC227	Mcc	HC227_Mcc_bin.120	97.2807	30.0529	45.9198	2.79536	1016226	1	1834	0.260328	0.0153619	-0.578871	3.36528	0.2625	0.2275	0.286	0.232	0.282	0.239	0.278	0.828709	107416	0.075496	0.0290246	1.26129	5.42276	0.069306	0.03675	0.148476	0.0407762	0.132059	0.0456495	0.114239	0.480163	1128	0.0322711	0.0151653	1.18517	4.72314	0.028932	0.0115902	0.0729541	0.0134327	0.0621422	0.0160467	0.0528084	0.480163	1128	0.118981
HC227	Mcc	HC227_Mcc_bin.121	98.2963	95.956	97.112	1.73326	3836664	1	7595	0.328943	0.0160018	-1.32772	7.63458	0.3305	0.29	0.3545	0.301	0.351	0.3105	0.3465	0.995318	6492606	0.0307687	0.0202089	3.71917	25.3205	0.025304	0.0128631	0.08819	0.014217	0.067024	0.015982	0.050091	0.984099	241165	0.0379398	0.020606	2.01052	9.73911	0.033078	0.013334	0.0922179	0.015464	0.076809	0.018355	0.062857	0.984099	241165	0.153897
HC227	Mcc	HC227_Mcc_bin.122	100	97.2141	98.5874	0	4314362	1	8578	0.303992	0.0244788	-0.794727	5.46048	0.3055	0.2505	0.3465	0.263	0.3405	0.2745	0.333	0.997881	8684028	0.0703339	0.0594261	3.73896	24.4231	0.052158	0.022261	0.231456	0.025189	0.17531	0.0291	0.130262	0.9958	332520	0.0484101	0.0370251	2.54255	11.2831	0.037379	0.013526	0.162994	0.015961	0.126199	0.019204	0.0893251	0.9958	332520	0.247419
HC227	Mcc	HC227_Mcc_bin.123	100	95.6259	97.764	0	1775312	1	3504	0.189741	0.0157827	-0.427098	4.02252	0.1905	0.155787	0.218213	0.1635	0.213	0.17	0.2085	0.995	1330896	0.0433076	0.0200678	2.42896	12.2309	0.038278	0.02123	0.099636	0.023252	0.0814353	0.025815	0.065823	0.984817	48205	0.116436	0.0506542	1.25386	5.4459	0.10732	0.0447021	0.245701	0.052469	0.212818	0.0622036	0.181836	0.984817	48205	0.196817
HC227	Mcc	HC227_Mcc_bin.124	97.399	70.3191	81.6729	2.67041	2227017	1	4118	0.17783	0.0129801	-0.138917	3.22703	0.17825	0.151	0.202	0.156	0.1985	0.161	0.194	0.882351	862641	0.037947	0.0171923	3.81556	28.7763	0.034375	0.019599	0.076647	0.021429	0.063743	0.023697	0.054332	0.677802	17205	0.119358	0.0690638	2.26842	9.76964	0.102895	0.0421842	0.343	0.0493082	0.259074	0.058673	0.189846	0.677802	17205	0.214964
HC227	Mcc	HC227_Mcc_bin.125	100	95.137	97.5079	0	3408317	1	6783	0.221864	0.0207684	-0.83414	4.22313	0.2245	0.171	0.255	0.1845	0.251	0.195	0.2455	0.998823	5453253	0.0863687	0.0405278	1.91177	8.21648	0.075229	0.04039	0.19857	0.044413	0.169032	0.049496	0.138324	0.998823	210276	0.0319308	0.0211459	2.83898	16.472	0.026222	0.010396	0.08843	0.012073	0.070882	0.014277	0.0557355	0.998823	210276	0.2384
HC227	Mcc	HC227_Mcc_bin.126	98.7785	98.0639	98.4199	1.23665	3636397	1	7165	0.179047	0.0153128	-0.413355	3.23207	0.18	0.145	0.2055	0.1515	0.202	0.1585	0.1975	0.990896	5499586	0.0374814	0.0190206	6.54266	92.2474	0.033537	0.018557	0.078701	0.020368	0.066571	0.022639	0.055539	0.97688	198135	0.122269	0.0583175	1.67958	7.7004	0.11016	0.0463653	0.272073	0.053768	0.231295	0.063539	0.194159	0.97688	198135	0.222959
HC227	Mcc	HC227_Mcc_bin.127	100	6.32852	11.9037	0	235468	1	466	0.268291	0.0291642	-0.563723	3.31906	0.271	0.202313	0.315188	0.216625	0.3105	0.23	0.304	1	23653	0.131766	0.0725042	1.4523	5.6008	0.110929	0.0445356	0.32086	0.053739	0.278559	0.0636592	0.231775	1	820	0.0578913	0.0241281	0.665845	3.34983	0.0550995	0.0187846	0.113432	0.0229063	0.102195	0.029276	0.0903503	1	820	0.235977
HC227	Mcc	HC227_Mcc_bin.128	100	98.711	99.3513	0	2931090	1	5835	0.213388	0.0172624	-0.615624	3.58919	0.215	0.174	0.242	0.182	0.2385	0.191	0.234	1	4062675	0.0783129	0.031099	1.61439	6.50356	0.070034	0.040934	0.161339	0.044351	0.14201	0.048689	0.120644	1	156520	0.0449639	0.0248526	2.37994	12.4816	0.039156	0.01628	0.109497	0.0188799	0.0891281	0.022294	0.073263	1	156520	0.187794
HC227	Mcc	HC227_Mcc_bin.129	100	26.0588	41.3438	0	1109048	1	2208	0.220737	0.0214522	-0.878162	4.64634	0.2225	0.166263	0.256	0.181	0.2505	0.1955	0.245	1	581581	0.0843762	0.043838	2.22775	10.288	0.071857	0.0382755	0.207756	0.042125	0.172836	0.046857	0.137772	1	22578	0.0533201	0.0350273	2.84414	15.7294	0.0446745	0.0169354	0.145142	0.0196645	0.113936	0.0235735	0.0895709	1	22578	0.240054
HC227	Mcc	HC227_Mcc_bin.12	100	15.8176	27.3147	0	519537	1	1022	0.285509	0.0204024	-0.604981	4.18172	0.287	0.239	0.3225	0.2485	0.3165	0.2605	0.30995	1	110215	0.0999236	0.0583434	2.17205	9.09316	0.082914	0.039303	0.27236	0.0445007	0.219871	0.050836	0.172203	0.982887	3916	0.0693754	0.0449626	1.66673	5.71126	0.055468	0.020374	0.200864	0.0238987	0.175479	0.0288225	0.132318	0.982887	3916	0.196855
HC227	Mcc	HC227_Mcc_bin.130	100	95.6438	97.7734	0	1711095	1	3412	0.22114	0.0131337	-0.674529	3.92062	0.2225	0.1885	0.243	0.196775	0.24	0.204	0.2365	1	1410360	0.0740256	0.0425751	2.70545	11.9405	0.061268	0.035211	0.215772	0.038251	0.155533	0.042083	0.119146	1	54285	0.0579157	0.0384409	2.91185	15.0998	0.048439	0.0189241	0.165388	0.022083	0.1257	0.0264088	0.0952596	1	54285	0.272395
HC227	Mcc	HC227_Mcc_bin.131	96.0824	85.1239	90.2718	4.07734	2253864	1	4432	0.163957	0.0147373	-0.16729	3.10815	0.164	0.134	0.1915	0.139	0.187	0.145	0.1825	0.991499	2073666	0.0327996	0.0138397	2.2404	12.7895	0.029756	0.015959	0.067098	0.017596	0.057955	0.019675	0.049241	0.971187	72010	0.154087	0.0717173	1.41944	6.23423	0.14077	0.0562633	0.338804	0.0656929	0.288769	0.0785348	0.243567	0.971187	72010	0.23568
HC227	Mcc	HC227_Mcc_bin.132	100	32.1166	48.6186	0	985820	1	1960	0.287446	0.0274784	-0.973642	4.5073	0.2915	0.221	0.330012	0.235475	0.3245	0.25	0.3175	1	450775	0.113544	0.0965922	2.29054	9.46422	0.07899	0.028904	0.388977	0.033086	0.315159	0.0387474	0.237003	1	17205	0.0605887	0.0376158	1.71951	7.0636	0.050297	0.0171009	0.1623	0.0205672	0.138212	0.0251772	0.111139	1	17205	0.160902
HC227	Mcc	HC227_Mcc_bin.133	100	90.688	95.1167	0	1864553	1	3638	0.197408	0.0169504	0.383319	5.5289	0.198	0.163	0.229	0.17	0.222075	0.1765	0.2165	0.99122	1274406	0.0593949	0.0449097	5.0778	39.6081	0.047835	0.025778	0.167697	0.028302	0.124587	0.031521	0.093398	0.96721	41616	0.0536089	0.035786	2.24576	9.56824	0.043348	0.0169854	0.160863	0.0197093	0.127444	0.0234165	0.095612	0.96721	41616	0.181911
HC227	Mcc	HC227_Mcc_bin.134	100	41.6901	58.8469	0	1144812	1	2260	0.175288	0.0166434	-0.260015	3.36737	0.1755	0.140237	0.206	0.147475	0.201	0.154	0.19555	0.996658	559153	0.0399253	0.0181265	2.1295	10.9522	0.035566	0.018438	0.0867596	0.020547	0.0740132	0.023129	0.061915	0.996658	20100	0.098014	0.053932	1.55382	6.384	0.084211	0.0317737	0.236217	0.0376669	0.203381	0.0449694	0.170565	0.996658	20100	0.211137
HC227	Mcc	HC227_Mcc_bin.135	96.7803	81.7617	88.6394	3.32677	5442307	1	10448	0.330968	0.0215618	-1.225	6.90105	0.333	0.281	0.366	0.2935	0.361	0.3055	0.355	0.958011	8843115	0.0283453	0.0328174	10.8876	155.408	0.022676	0.0113	0.070903	0.012578	0.052633	0.014238	0.041262	0.859423	249571	0.0319783	0.0160635	1.96953	10.122	0.02865	0.011713	0.0729178	0.013594	0.061328	0.016163	0.051061	0.859423	249571	0.0974995
HC227	Mcc	HC227_Mcc_bin.136	99.3015	32.568	49.0493	0.703464	1842807	1	3647	0.323904	0.0217846	-0.911624	4.70382	0.3265	0.270575	0.359925	0.2835	0.3545	0.296	0.349	0.997831	1488675	0.0429827	0.0447677	4.0343	25.1254	0.028837	0.012824	0.167279	0.014402	0.126887	0.016492	0.082417	0.997831	54615	0.0517365	0.0378665	3.57532	22.1544	0.042138	0.0164287	0.150512	0.0192847	0.112669	0.0228614	0.0862594	0.997831	54615	0.161261
HC227	Mcc	HC227_Mcc_bin.137	98.3781	90.2968	94.1644	1.64864	2623945	1	5143	0.223005	0.0208056	-1.17104	4.73509	0.227	0.1675	0.253	0.17905	0.249	0.1945	0.2445	0.991264	2678455	0.113155	0.0410031	1.29244	5.41707	0.104326	0.056044	0.219459	0.063725	0.194974	0.071698	0.168161	0.976861	91378	0.0762979	0.0411307	2.60359	14.565	0.0675915	0.0282963	0.181636	0.0328334	0.146526	0.038749	0.119722	0.976861	91378	0.215954
HC227	Mcc	HC227_Mcc_bin.138	99.8575	44.2906	61.364	0.142719	2492541	1	4947	0.320227	0.0215576	-0.704748	3.6233	0.3235	0.272325	0.355	0.2795	0.35	0.2905	0.3445	0.998578	2835771	0.0452017	0.0371214	3.21068	19.1371	0.032657	0.01395	0.136683	0.015622	0.110081	0.017882	0.087001	0.996254	105570	0.0577269	0.0388012	2.39593	10.9858	0.047123	0.0174259	0.169896	0.0205614	0.135044	0.0247288	0.101713	0.996254	105570	0.177731
HC227	Mcc	HC227_Mcc_bin.139	100	97.1224	98.5402	0	4286306	1	8489	0.189775	0.0175707	-0.518059	3.46448	0.1915	0.15	0.22	0.158	0.216	0.167	0.2105	0.998448	8187081	0.0548835	0.0237989	1.77982	7.72042	0.049134	0.026059	0.11933	0.028701	0.101565	0.032101	0.084658	0.992786	301476	0.171884	0.0712843	0.900968	3.91256	0.159783	0.0667586	0.342378	0.0774205	0.308209	0.0915215	0.269778	0.992786	301476	0.204685
HC227	Mcc	HC227_Mcc_bin.13	93.6714	89.7625	91.6753	6.75617	5987146	1	11850	0.339494	0.0166511	-0.8124	5.00155	0.341	0.3015	0.368387	0.311	0.364	0.319	0.3585	1	15755691	0.0252513	0.0178267	4.75901	37.4708	0.020927	0.010876	0.075041	0.012008	0.05154	0.013476	0.038099	0.994232	580503	0.0385838	0.0227906	2.09457	9.57236	0.032695	0.012832	0.101508	0.014968	0.083137	0.017813	0.0660548	0.994232	580503	0.130711
HC227	Mcc	HC227_Mcc_bin.140	100	6.44181	12.1039	0	356402	1	706	0.311716	0.0127139	-0.0571261	2.92856	0.312	0.285	0.336187	0.29	0.3325	0.2955	0.328	0.992814	57291	0.0348569	0.0130435	1.53534	7.5742	0.03249	0.017123	0.068077	0.019382	0.05892	0.021813	0.050689	0.992814	2145	0.0664398	0.0329588	0.983069	4.03403	0.060214	0.0210976	0.146753	0.0250266	0.130552	0.0305826	0.110163	0.992814	2145	0.218298
HC227	Mcc	HC227_Mcc_bin.141	97.906	66.2088	78.9964	2.13878	2980978	1	5729	0.210325	0.017659	-0.398656	3.22588	0.212	0.1715	0.2415	0.1785	0.237	0.1865	0.2315	0.970242	2636956	0.0743971	0.0298273	1.59036	6.94543	0.06758	0.036436	0.152666	0.040136	0.132701	0.0448265	0.112809	0.881171	73920	0.040021	0.0248157	2.48426	13.1863	0.0337365	0.012829	0.103106	0.01499	0.0844671	0.01797	0.0686671	0.881171	73920	0.212294
HC227	Mcc	HC227_Mcc_bin.142	100	94.3052	97.0691	0	1587061	1	3117	0.19452	0.0161839	-0.377633	3.53938	0.1955	0.1575	0.224	0.166	0.22	0.1745	0.2145	0.994583	997578	0.0327552	0.0181469	2.72302	15.0808	0.027667	0.014444	0.081006	0.01591	0.067949	0.017785	0.054203	0.970199	33930	0.0404041	0.0373936	6.09673	51.9278	0.0321745	0.0133281	0.107414	0.0155029	0.0842362	0.0182639	0.0647356	0.970199	33930	0.111343
HC227	Mcc	HC227_Mcc_bin.143	99.8162	66.9721	80.1603	0.184112	5948327	1	11081	0.312577	0.0114301	-0.371309	4.08526	0.313	0.2885	0.3335	0.293	0.3305	0.2985	0.3265	0.901352	6921060	0.0373031	0.011932	1.254	5.61115	0.03505	0.020584	0.067256	0.022366	0.060253	0.024614	0.052967	0.694452	148240	0.0519074	0.0220851	1.25093	6.01284	0.048196	0.020251	0.105333	0.0235449	0.0927192	0.027829	0.080421	0.694452	148240	0.218657
HC227	Mcc	HC227_Mcc_bin.144	100	22.9462	37.3272	0	770798	1	1524	0.233537	0.0253281	-0.646937	3.40976	0.236	0.176038	0.275	0.187075	0.269425	0.19865	0.264	0.990259	260281	0.134913	0.0754257	1.80873	6.98303	0.110275	0.054828	0.344849	0.061648	0.291848	0.069644	0.23734	0.981075	9591	0.10012	0.0416208	1.09823	4.97008	0.093376	0.0388763	0.201888	0.04548	0.177207	0.054178	0.154059	0.981075	9591	0.259742
HC227	Mcc	HC227_Mcc_bin.145	100	38.0678	55.1437	0	1059104	1	2084	0.167559	0.0161516	-0.162008	2.92115	0.168	0.1345	0.1975	0.1415	0.1935	0.147	0.1885	0.997695	456490	0.0304466	0.0137665	1.99436	9.48752	0.027078	0.0143842	0.067077	0.015838	0.0571146	0.017661	0.047356	0.97445	15753	0.0974279	0.0525961	2.15004	10.7198	0.084684	0.0355658	0.226786	0.0411608	0.193138	0.0484548	0.159822	0.97445	15753	0.211929
HC227	Mcc	HC227_Mcc_bin.146	100	99.7659	99.8828	0	2007280	1	3987	0.297344	0.0186415	-1.51649	9.04971	0.3	0.2535	0.3245	0.2655	0.3205	0.275	0.3165	0.997604	1855701	0.0778545	0.0674573	4.7083	32.6065	0.059459	0.029827	0.24455	0.033003	0.174539	0.037116	0.12763	0.997604	70876	0.061978	0.0372948	2.53121	13.5179	0.0532965	0.0202749	0.16385	0.0238527	0.130329	0.028642	0.102436	0.997604	70876	0.244361
HC227	Mcc	HC227_Mcc_bin.147	100	90.7433	95.147	0	4994011	1	9667	0.340419	0.014607	-1.09294	7.18818	0.3415	0.3095	0.365	0.31615	0.3615	0.3235	0.357	0.980822	8199225	0.0285911	0.0188524	5.06414	45.5254	0.024062	0.01252	0.071573	0.013795	0.055992	0.015445	0.04414	0.924491	246753	0.0336108	0.0188451	1.87991	8.09371	0.029054	0.0112708	0.0860018	0.013207	0.0713274	0.015772	0.056587	0.924491	246753	0.147597
HC227	Mcc	HC227_Mcc_bin.148	100	89.8672	94.6632	0	3978166	1	7792	0.355341	0.0160468	-0.708434	6.00085	0.356	0.3225	0.384	0.3295	0.3795	0.3355	0.3745	0.984898	6116253	0.0198501	0.0105805	2.59966	13.4267	0.017125	0.008676	0.049083	0.009615	0.039665	0.010836	0.031521	0.961529	208981	0.0412836	0.0228745	2.18512	10.508	0.035904	0.014672	0.104599	0.017113	0.085295	0.020251	0.067651	0.961529	207690	0.129793
HC227	Mcc	HC227_Mcc_bin.149	100	21.7572	35.7387	0	667838	1	1331	0.289679	0.0266553	-1.14101	4.69042	0.2955	0.221625	0.3315	0.2325	0.3235	0.2525	0.317	1	213531	0.100729	0.0925806	2.64923	10.7466	0.068389	0.029475	0.405714	0.033098	0.30869	0.037762	0.207142	1	8256	0.0564679	0.0296179	1.3178	5.1718	0.0495145	0.0183444	0.131296	0.0217415	0.115524	0.0258825	0.0969385	1	8256	0.146123
HC227	Mcc	HC227_Mcc_bin.14	100	96.5969	98.269	0	3845990	1	7641	0.292411	0.0165279	-0.342464	3.81615	0.293	0.2575	0.324	0.265	0.318	0.272	0.3125	0.997645	6843150	0.0550405	0.0293121	3.7338	28.5347	0.047986	0.025534	0.125601	0.028066	0.103598	0.031316	0.084685	0.995493	263175	0.0345658	0.0218894	2.79447	14.9848	0.029126	0.011663	0.0948255	0.01358	0.0738813	0.016119	0.0574706	0.995493	263175	0.25378
HC227	Mcc	HC227_Mcc_bin.150	56.8875	2.14492	4.13396	75.7854	230145	1	435	0.270857	0.0232949	0.00906385	3.12659	0.2715	0.222425	0.319225	0.23385	0.3063	0.2417	0.3	0.989294	12720	0.129471	0.061396	1.24666	5.32935	0.118621	0.0391347	0.296652	0.0513912	0.253857	0.0660655	0.206075	0.788438	276	0.10394	0.0429399	0.420147	2.68664	0.0978305	0.0354901	0.19039	0.0422548	0.180208	0.054381	0.168099	0.788438	276	0.291917
HC227	Mcc	HC227_Mcc_bin.151	99.4622	89.2716	94.0917	0.540749	3790355	1	7444	0.334201	0.0225129	-0.972348	5.01247	0.3375	0.2805	0.371	0.292	0.365	0.305	0.359	0.996698	5744355	0.0314639	0.0260254	4.72713	35.9433	0.024556	0.011225	0.0963472	0.012563	0.0705183	0.014335	0.052756	0.973264	199396	0.0388466	0.029643	2.95252	15.8465	0.030568	0.010762	0.118472	0.012662	0.093874	0.0152755	0.070255	0.973264	199396	0.175068
HC227	Mcc	HC227_Mcc_bin.152	99.8177	88.1976	93.6486	0.18267	5957153	1	11660	0.238621	0.0175241	-0.779905	4.50704	0.2405	0.196	0.2685	0.207	0.264	0.217	0.259	0.996004	13501806	0.130838	0.0538361	2.07299	9.23576	0.116704	0.070059	0.281969	0.075583	0.239516	0.082567	0.196763	0.958514	441330	0.0746058	0.0346722	1.4597	6.2227	0.067346	0.0285872	0.165265	0.033072	0.142413	0.039006	0.119322	0.958514	441330	0.254395
HC227	Mcc	HC227_Mcc_bin.153	99.1295	96.1503	97.6172	0.878123	4697786	1	9328	0.307758	0.0140185	-0.855228	5.12929	0.309	0.275	0.331	0.283	0.3275	0.291	0.3235	0.998491	10131751	0.0450654	0.0259667	4.09949	30.0899	0.03855	0.02165	0.114704	0.023609	0.090052	0.026134	0.068239	0.998491	380628	0.0498654	0.0338943	2.9462	16.7542	0.040816	0.016128	0.143082	0.0188	0.113802	0.022252	0.0860129	0.998491	380628	0.201817
HC227	Mcc	HC227_Mcc_bin.154	98.1289	51.5378	67.5815	1.90678	1296944	1	2382	0.164402	0.0141151	0.319069	3.82301	0.164	0.1385	0.193738	0.142	0.188	0.147	0.182	0.868943	253828	0.037048	0.0189128	1.43275	5.37972	0.031765	0.014656	0.0869767	0.016427	0.0760336	0.0187327	0.0636186	0.576406	4005	0.106016	0.0534723	1.32121	4.85375	0.093027	0.0369011	0.250072	0.043214	0.219032	0.0524898	0.180522	0.576406	4005	0.210221
HC227	Mcc	HC227_Mcc_bin.155	96.0997	87.9113	91.8233	4.0586	6353791	1	12435	0.335037	0.0217845	-1.96315	10.2516	0.3385	0.28	0.365	0.298	0.3615	0.311	0.357	0.991931	15465141	0.0350208	0.0450689	7.16785	69.6375	0.024653	0.011194	0.122437	0.012494	0.079537	0.014247	0.055314	0.953023	511566	0.0584282	0.0409879	2.73673	14.368	0.047311	0.0175082	0.175619	0.020526	0.136491	0.024641	0.102317	0.953023	506521	0.140171
HC227	Mcc	HC227_Mcc_bin.156	73.0489	5.18755	9.68716	36.8947	211077	1	408	0.194504	0.0272188	-0.0908357	3.3678	0.19625	0.138263	0.244825	0.145	0.233825	0.155	0.22665	0.980325	14535	0.080345	0.0433077	1.37707	6.16673	0.07242	0.0205683	0.190245	0.0274901	0.160281	0.0349424	0.135424	0.878419	406	0.161585	0.0790757	1.33166	5.15479	0.145813	0.0522861	0.380921	0.0671343	0.315132	0.0838035	0.272873	0.878419	406	0.252387
HC227	Mcc	HC227_Mcc_bin.157	99.906	91.6128	95.5799	0.0941113	3787578	1	7472	0.336154	0.0161901	-0.669164	4.95229	0.337	0.2985	0.364613	0.3085	0.360225	0.317	0.355	0.992217	6091795	0.024999	0.0154384	2.90098	14.6826	0.020661	0.010529	0.07086	0.011628	0.0538163	0.013057	0.041209	0.978617	218791	0.0507502	0.0346368	3.11094	16.7763	0.042165	0.016569	0.146979	0.019395	0.106465	0.023053	0.083861	0.978617	218791	0.175222
HC227	Mcc	HC227_Mcc_bin.158	100	91.9688	95.8164	0	4063522	1	7983	0.297688	0.020952	-1.51487	8.37139	0.3005	0.249275	0.33	0.2625	0.3255	0.2735	0.32	1	6615703	0.0699215	0.0574834	5.61131	44.8183	0.056495	0.02882	0.183944	0.031822	0.137136	0.035743	0.106871	0.984908	224115	0.0648732	0.0289596	1.38102	6.29246	0.059429	0.024998	0.137932	0.028999	0.119574	0.0342334	0.1019	0.984908	224115	0.161369
HC227	Mcc	HC227_Mcc_bin.159	94.2074	4.8428	9.21204	6.14875	226279	1	444	0.175608	0.013803	0.113389	3.30774	0.17575	0.15	0.2055	0.1525	0.199	0.1565	0.1925	1	19900	0.040193	0.0176756	1.17752	4.69968	0.036015	0.0163493	0.0856368	0.0196979	0.076071	0.0226728	0.0653901	0.966859	630	0.208634	0.0958419	0.757088	3.72433	0.197744	0.0531211	0.428015	0.0693303	0.387899	0.0984191	0.334353	0.966859	630	0.292318
HC227	Mcc	HC227_Mcc_bin.15	100	0.83665	1.65942	0	234351	1	400	0.228756	0.0127856	-0.324166	4.79665	0.2285	0.201	0.253012	0.209	0.2495	0.214	0.2445	0.565472	1378	0.0860705	0.0218945	-0.536155	4.20604	0.0857345	0.0278049	0.12756	0.0503127	0.120828	0.0623834	0.112727	0.0871855	3	0.0151167	0.0107289	0.681372	1.5	0.009914	0.00807765	0.0265779	0.0081743	0.0257009	0.0083676	0.0239468	0.0871855	3	0.129299
HC227	Mcc	HC227_Mcc_bin.160	96.9048	64.2052	77.2365	3.19405	4455319	1	8160	0.342282	0.0172102	-1.13748	5.85378	0.3445	0.301	0.3685	0.3105	0.365	0.321	0.3615	0.855045	3128751	0.0298767	0.0197815	3.53943	23.2083	0.024329	0.011999	0.081782	0.013268	0.064758	0.01496	0.050295	0.616174	56953	0.0694732	0.0344713	1.32237	5.45267	0.061937	0.0241128	0.156878	0.0281326	0.136764	0.033584	0.115806	0.616174	56953	0.172221
HC227	Mcc	HC227_Mcc_bin.161	16.5774	11.4527	13.5466	503.23	10883256	1	17561	0.341026	0.0159412	-0.653597	4.69812	0.342	0.306	0.369	0.314	0.365	0.322	0.36	0.430461	2812006	0.0202637	0.0106664	2.41731	13.3761	0.017723	0.008125	0.046421	0.009131	0.039016	0.010474	0.03266	0.190002	27966	0.0428814	0.0185393	1.1589	5.27321	0.039609	0.016285	0.0889476	0.0189385	0.0782535	0.022654	0.0671555	0.190002	27966	0.177353
HC227	Mcc	HC227_Mcc_bin.162	100	2.90246	5.64118	0	202021	1	400	0.303212	0.0345238	-0.72033	2.94897	0.3095	0.232425	0.3515	0.2405	0.3465	0.2505	0.3425	1	17766	0.105246	0.0737083	1.49707	6.26195	0.0894855	0.0156627	0.284076	0.021561	0.241199	0.031071	0.201317	0.972765	666	0.103709	0.048747	0.604984	3.29523	0.098665	0.0243433	0.215464	0.033173	0.188963	0.043128	0.168444	0.972765	666	0.269867
HC227	Mcc	HC227_Mcc_bin.163	71.6357	4.72999	8.87404	39.5952	323854	1	631	0.239285	0.0384572	-0.532108	2.38521	0.2475	0.15925	0.2955	0.167	0.28925	0.1785	0.283	0.986383	37128	0.209893	0.127788	0.91756	3.00441	0.171299	0.0476383	0.515658	0.0615955	0.470234	0.0790735	0.411839	0.986383	1225	0.0754369	0.035337	0.722801	3.45842	0.070393	0.0207798	0.154818	0.0260972	0.140093	0.0345396	0.122334	0.986383	1225	0.219773
HC227	Mcc	HC227_Mcc_bin.164	99.9583	98.2649	99.1044	0.0416896	4857334	1	9645	0.254492	0.018581	-0.496074	4.53278	0.2555	0.215	0.2875	0.2235	0.2825	0.2315	0.2765	0.999584	10767120	0.124171	0.0540576	1.87909	8.30942	0.110013	0.061368	0.269893	0.066806	0.230508	0.073768	0.19274	0.994468	400065	0.0917813	0.0470098	2.03234	11.5471	0.081799	0.0327336	0.206823	0.038203	0.17797	0.045368	0.14971	0.994468	400065	0.273156
HC227	Mcc	HC227_Mcc_bin.165	99.2527	90.0788	94.4435	0.752881	4164997	1	8216	0.286147	0.0261819	-1.33884	6.2614	0.2905	0.2155	0.3255	0.237875	0.320125	0.2545	0.3135	0.996997	7340196	0.0771182	0.0896145	3.74114	18.1419	0.049889	0.023203	0.416433	0.025888	0.240074	0.029411	0.131894	0.991791	263175	0.0370381	0.0233649	3.13433	18.7096	0.031404	0.0129853	0.0998375	0.01509	0.0781176	0.017807	0.0605528	0.991791	263175	0.174066
HC227	Mcc	HC227_Mcc_bin.166	100	13.1926	23.3099	0	433316	1	862	0.266613	0.0278308	-0.582006	3.12467	0.27075	0.204762	0.311238	0.214525	0.3065	0.22755	0.2985	1	86320	0.174942	0.103316	1.34929	4.69333	0.144976	0.053265	0.446101	0.0632106	0.394711	0.0757859	0.329865	1	3160	0.0766088	0.0382361	1.00728	3.91237	0.067736	0.0232768	0.172667	0.0284178	0.151342	0.0345427	0.130628	1	3160	0.246081
HC227	Mcc	HC227_Mcc_bin.167	94.1107	89.4566	91.7247	6.25785	4463910	1	8784	0.280561	0.0240497	-0.88799	4.72967	0.2835	0.225288	0.32	0.2375	0.314	0.25	0.308	0.998589	8158780	0.0948762	0.0705799	3.49762	19.8654	0.074463	0.03494	0.287553	0.039216	0.213055	0.044791	0.162562	0.99064	280126	0.0400409	0.0203238	1.85882	8.93441	0.035629	0.014599	0.0928453	0.016989	0.078106	0.02007	0.0646875	0.99064	280126	0.19212
HC227	Mcc	HC227_Mcc_bin.168	53.3039	2.31934	4.44527	87.6035	204857	1	380	0.230132	0.0144135	-0.086628	3.26642	0.22975	0.202475	0.258	0.20745	0.254	0.2115	0.249	0.900296	6216	0.0949236	0.026825	0.219467	4.05128	0.092966	0.039717	0.152924	0.056796	0.142006	0.0657945	0.129685	0.521159	91	0.0343257	0.00950549	0.0250755	2.66555	0.033853	0.017648	0.0519525	0.019444	0.051053	0.021692	0.047181	0.521159	91	0.223353
HC227	Mcc	HC227_Mcc_bin.169	100	94.349	97.0923	0	3581519	1	7107	0.227291	0.015985	-0.577228	4.766	0.228	0.1915	0.257	0.2005	0.252	0.2083	0.2465	0.997599	5846490	0.0992428	0.040361	2.30677	11.7762	0.089375	0.053105	0.205307	0.057435	0.174718	0.062888	0.146486	0.995671	220116	0.0802434	0.0408538	2.53316	14.294	0.072187	0.030587	0.179279	0.035535	0.147875	0.041949	0.123716	0.995671	220116	0.253224
HC227	Mcc	HC227_Mcc_bin.16	100	94.772	97.3158	0	3138866	1	6209	0.237249	0.0208524	-1.12456	5.58322	0.24	0.1811	0.27	0.198	0.265	0.213	0.2595	0.999225	4317391	0.197952	0.0651166	1.27366	5.75986	0.185449	0.106272	0.363351	0.117718	0.322939	0.130579	0.282247	0.994931	156520	0.121373	0.0549722	1.24051	4.98035	0.110404	0.0458529	0.265014	0.0533409	0.232383	0.0632817	0.194939	0.994931	156520	0.228715
HC227	Mcc	HC227_Mcc_bin.170	65.0783	1.31078	2.5698	53.6611	231975	1	424	0.313185	0.0153965	-0.17163	4.33922	0.3135	0.285363	0.3425	0.289	0.337925	0.2935	0.33185	0.800905	8001	0.0302743	0.0105375	0.663663	4.76126	0.02931	0.011164	0.053347	0.014988	0.048099	0.018371	0.043495	0.618847	171	0.0639203	0.0399067	1.33087	4.13521	0.053181	0.0167135	0.168352	0.0223405	0.162188	0.026334	0.122475	0.618847	171	0.205697
HC227	Mcc	HC227_Mcc_bin.171	100	34.1121	50.8711	0	855612	1	1691	0.249387	0.0245346	-0.495236	3.81345	0.2515	0.191625	0.294375	0.20375	0.2845	0.217	0.2765	1	317206	0.192169	0.0878254	1.59258	6.42998	0.170133	0.0846351	0.429803	0.0952723	0.371489	0.108173	0.308669	1	11175	0.129259	0.0547711	0.993851	4.3862	0.119477	0.0482988	0.260725	0.0565124	0.232905	0.0684492	0.202721	1	11175	0.280159
HC227	Mcc	HC227_Mcc_bin.172	100	73.0383	84.4187	0	2760997	1	5429	0.3301	0.019135	-0.983942	5.72267	0.3325	0.2865	0.3625	0.2965	0.3575	0.3065	0.3515	0.992676	3113760	0.0294587	0.0219024	4.63234	34.4137	0.023929	0.011654	0.084847	0.012961	0.060668	0.01468	0.046655	0.986989	109746	0.0772568	0.0369746	1.82449	9.13627	0.0698955	0.0290276	0.168901	0.0337732	0.143342	0.0400585	0.121459	0.986989	109746	0.176894
HC227	Mcc	HC227_Mcc_bin.173	97.9423	14.5572	25.347	2.10095	2533754	1	4290	0.280834	0.0137267	-0.541738	4.20965	0.2815	0.251	0.305	0.258	0.3015	0.264	0.2975	0.567336	180901	0.0708276	0.0277612	1.51858	6.84507	0.065575	0.034368	0.143062	0.037872	0.122115	0.042361	0.104794	0.126393	406	0.0593561	0.0242325	0.545396	2.88307	0.055781	0.0209064	0.115645	0.0247792	0.104249	0.028699	0.0913505	0.126393	406	0.248585
HC227	Mcc	HC227_Mcc_bin.174	56.2321	2.61756	5.00227	77.8344	204888	1	387	0.21265	0.0191356	0.0119414	3.32026	0.2135	0.1735	0.253675	0.18065	0.24035	0.188	0.2345	0.923949	9730	0.0953134	0.039915	1.4697	7.28038	0.089224	0.0344877	0.196825	0.0471495	0.168232	0.0554561	0.140536	0.767068	253	0.0728938	0.0301251	0.51943	3.16048	0.07126	0.0227983	0.13828	0.0263248	0.130997	0.038069	0.108307	0.767068	253	0.292951
HC227	Mcc	HC227_Mcc_bin.175	100	7.41892	13.8131	0	207968	1	410	0.225584	0.0175388	-0.691958	4.21597	0.22725	0.182837	0.256663	0.1934	0.250775	0.2035	0.24505	1	17205	0.115723	0.0477558	1.30212	6.14216	0.106075	0.0469424	0.235205	0.0582858	0.206659	0.0682144	0.178039	1	561	0.106858	0.0429938	0.593042	3.55707	0.102187	0.034213	0.204557	0.045052	0.18024	0.056081	0.161405	1	561	0.277767
HC227	Mcc	HC227_Mcc_bin.176	32.145	1.80711	3.42186	211.09	243893	1	463	0.292973	0.0258855	-0.720675	3.49107	0.2965	0.2335	0.3325	0.24655	0.32895	0.2557	0.3235	0.934529	14028	0.0943015	0.0624532	1.87024	7.23925	0.0755475	0.0268779	0.275459	0.033029	0.225904	0.0397184	0.175709	0.781921	351	0.091449	0.0397371	0.559576	2.72455	0.085013	0.030211	0.17509	0.0368715	0.163061	0.043789	0.147374	0.781921	351	0.258392
HC227	Mcc	HC227_Mcc_bin.177	98.8556	87.2605	92.6969	1.15763	4191683	1	8300	0.306397	0.0177649	-0.618778	4.14867	0.308	0.266	0.3375	0.276	0.333	0.2845	0.3275	0.996867	7740145	0.0537021	0.0340313	3.94389	26.6911	0.045211	0.022649	0.134314	0.025099	0.105371	0.028299	0.084338	0.988538	285390	0.0639897	0.0313824	1.47119	6.12765	0.057131	0.023231	0.147029	0.027028	0.126286	0.032014	0.104822	0.988538	285390	0.235585
HC227	Mcc	HC227_Mcc_bin.178	100	86.4063	92.7075	0	2429204	1	4838	0.237638	0.0141332	-0.459978	4.4279	0.2385	0.2075	0.264	0.213	0.259	0.2205	0.2545	1	2802528	0.132803	0.0486644	1.55809	6.71816	0.121569	0.070329	0.260058	0.076747	0.228826	0.084692	0.196402	0.993251	107416	0.103419	0.0435759	1.30447	5.94963	0.095628	0.04176	0.211341	0.048399	0.185006	0.0567035	0.159059	0.993251	107416	0.282534
HC227	Mcc	HC227_Mcc_bin.179	100	93.5238	96.6536	0	7951250	1	15473	0.295798	0.0153751	-0.445219	3.73397	0.297	0.261	0.3235	0.268	0.319	0.276	0.314	0.987383	22361328	0.0709334	0.0434416	2.32906	10.2885	0.056465	0.029605	0.192227	0.032365	0.159296	0.035978	0.125803	0.939216	700336	0.0585243	0.035151	2.17254	10.0369	0.049293	0.0194174	0.1529	0.022626	0.125707	0.026937	0.101331	0.939216	700336	0.232995
HC227	Mcc	HC227_Mcc_bin.17	100	51.0875	67.6264	0	2174260	1	4339	0.215919	0.0181968	-0.580444	3.60518	0.2175	0.1735	0.247	0.1815	0.2425	0.192	0.237	1	2303731	0.0732883	0.0329865	1.92134	8.55713	0.064525	0.035191	0.162512	0.038665	0.138704	0.042965	0.11518	1	90525	0.0576128	0.0369812	1.96833	7.9615	0.046539	0.0181721	0.160511	0.0212654	0.137	0.0253804	0.108014	1	90525	0.24531
HC227	Mcc	HC227_Mcc_bin.180	97.6716	34.6374	51.1392	2.3839	5775955	1	9814	0.341517	0.0179433	-0.893337	5.58718	0.343	0.3005	0.372	0.3105	0.3675	0.3195	0.3625	0.600337	1485226	0.0269232	0.0134642	1.79218	7.46297	0.023245	0.011551	0.0630474	0.012788	0.053736	0.014392	0.0445365	0.267998	13041	0.0560267	0.0326582	1.80982	7.65473	0.047586	0.018087	0.14437	0.021074	0.119996	0.024986	0.097969	0.267998	13041	0.147768
HC227	Mcc	HC227_Mcc_bin.181	98.9675	96.4888	97.7124	1.04323	5537536	1	10986	0.225096	0.0147946	-1.00348	5.63446	0.2265	0.1915	0.249	0.1995	0.246	0.207	0.242	1	13852216	0.12054	0.042363	1.67868	7.66012	0.111054	0.066556	0.232088	0.071949	0.202812	0.078739	0.174091	0.997868	518671	0.0768968	0.0398746	2.64525	17.5502	0.068993	0.0281848	0.17001	0.0328535	0.144687	0.038941	0.121741	0.997868	518671	0.26063
HC227	Mcc	HC227_Mcc_bin.182	100	88.3079	93.791	0	3404009	1	6663	0.321562	0.023268	-1.34693	7.36015	0.3245	0.266	0.358	0.2805	0.353	0.294	0.347	0.990707	4453620	0.0419957	0.0492845	5.03235	35.3442	0.028108	0.012516	0.174198	0.01402	0.109837	0.016047	0.074205	0.963634	148240	0.0500769	0.0274261	1.64914	7.00256	0.0433735	0.016601	0.12411	0.019448	0.104708	0.023209	0.085566	0.963634	148240	0.14406
HC227	Mcc	HC227_Mcc_bin.183	46.6814	4.79235	8.69234	114.218	951514	1	1740	0.322045	0.0181412	-0.420702	3.73781	0.3235	0.284	0.355262	0.2915	0.349025	0.298	0.343	0.844844	143916	0.0337677	0.021096	3.54609	21.6973	0.02876	0.013238	0.0820542	0.0150528	0.0646135	0.017271	0.053201	0.624233	3003	0.0688661	0.032658	0.966248	4.10973	0.063163	0.0221573	0.146044	0.0267022	0.130171	0.0329646	0.113994	0.624233	3003	0.243092
HC227	Mcc	HC227_Mcc_bin.184	79.086	4.91457	9.25406	26.4446	396262	1	772	0.277357	0.0212607	-0.45067	3.99523	0.279	0.231775	0.315862	0.240775	0.308725	0.25055	0.30145	0.989381	55945	0.105318	0.0514971	2.00137	8.60814	0.093597	0.0434786	0.259625	0.0505334	0.21125	0.0587442	0.163497	0.97052	1770	0.0869336	0.0393186	0.928854	4.1439	0.0819715	0.0285852	0.181676	0.0352262	0.158425	0.042756	0.139916	0.97052	1770	0.286698
HC227	Mcc	HC227_Mcc_bin.185	100	85.8014	92.3582	0	2641272	1	5250	0.278555	0.0152967	-0.23903	3.87438	0.2795	0.247	0.3065	0.253	0.302	0.2595	0.297	1	3221991	0.111819	0.0493603	1.88418	8.00216	0.099638	0.05354	0.248278	0.059009	0.211537	0.065889	0.173087	0.993882	121771	0.0910919	0.0490978	2.82947	18.3749	0.08156	0.0324352	0.207993	0.0381065	0.171988	0.04559	0.142934	0.993882	121771	0.213127
HC227	Mcc	HC227_Mcc_bin.186	97.8959	70.329	81.8538	2.14937	3312349	1	6078	0.162608	0.0145961	0.043456	3.00496	0.1625	0.134	0.191	0.139	0.186575	0.144	0.1815	0.860776	1802151	0.0305462	0.0206288	3.94471	27.344	0.025099	0.012217	0.078756	0.013523	0.063815	0.015259	0.050573	0.627137	34191	0.1014	0.0533815	1.75089	7.91608	0.089001	0.0347193	0.23821	0.041029	0.202572	0.049121	0.168706	0.627137	34191	0.208771
HC227	Mcc	HC227_Mcc_bin.187	100	5.44541	10.3284	0	224676	1	446	0.292649	0.0142515	-0.213272	2.98428	0.2935	0.262562	0.3195	0.26875	0.316375	0.2745	0.31025	1	23220	0.060265	0.0227102	0.858321	3.86418	0.0553855	0.0261864	0.114656	0.031471	0.104231	0.0365759	0.0930496	1	861	0.0422469	0.0169575	0.706599	3.36573	0.039524	0.0156805	0.0815275	0.018133	0.073745	0.022833	0.065952	1	861	0.260406
HC227	Mcc	HC227_Mcc_bin.188	100	93.4948	96.638	0	2884449	1	5705	0.332509	0.0151756	-0.29024	3.91322	0.333	0.3028	0.3605	0.308	0.3565	0.3135	0.3515	0.99863	3616705	0.024764	0.0145628	3.36498	19.3302	0.021079	0.011084	0.067547	0.012216	0.048624	0.013672	0.037774	0.992945	129795	0.0335684	0.0253267	2.84675	13.792	0.026185	0.0104679	0.110799	0.0121934	0.0863696	0.014492	0.0605526	0.992945	129795	0.145683
HC227	Mcc	HC227_Mcc_bin.189	100	98.1969	99.0903	0	1793945	1	3575	0.188301	0.0221317	0.143388	3.47612	0.188	0.1445	0.2325	0.1515	0.2235	0.161	0.2153	1	1537381	0.0413954	0.0282274	2.91825	15.877	0.03293	0.015374	0.119803	0.017093	0.093895	0.019385	0.071889	1	59685	0.0486444	0.042064	3.022	15.0694	0.035206	0.0138871	0.174044	0.0161012	0.136719	0.0190894	0.0937488	1	59685	0.126322
HC227	Mcc	HC227_Mcc_bin.18	99.6328	84.0897	91.2038	0.368522	1585403	1	3037	0.14679	0.0163167	0.0687169	2.94326	0.146	0.1155	0.1795	0.1204	0.175	0.126	0.1685	0.956878	727821	0.0171907	0.00913669	1.92881	8.49987	0.014729	0.006938	0.0419015	0.007732	0.034984	0.008776	0.028716	0.885443	20706	0.0653245	0.0311221	1.19857	4.76244	0.0585675	0.0234805	0.144196	0.0273578	0.127176	0.032544	0.108162	0.885443	20706	0.151758
HC227	Mcc	HC227_Mcc_bin.190	100	13.9592	24.4986	0	382039	1	748	0.158856	0.0146142	0.0483381	2.74521	0.1585	0.131175	0.187	0.1355	0.184	0.14035	0.1785	1	56280	0.0221419	0.00741175	0.869467	4.47678	0.020966	0.0109369	0.039525	0.0124929	0.03582	0.01409	0.031988	0.978636	1830	0.117484	0.0535832	1.48335	6.04789	0.106886	0.0465342	0.271523	0.0551082	0.227563	0.0639815	0.180697	0.978636	1830	0.197582
HC227	Mcc	HC227_Mcc_bin.191	99.6067	74.4694	85.2231	0.394887	3551120	1	7006	0.276271	0.0270587	-1.05687	5.0373	0.2795	0.2075	0.3195	0.225125	0.3135	0.2425	0.3065	0.996654	5357901	0.105024	0.0831009	2.72622	11.9222	0.078184	0.034924	0.366769	0.039491	0.284888	0.045471	0.197355	0.988707	190653	0.0441815	0.0246702	1.89193	8.74574	0.038039	0.0149003	0.109184	0.0174192	0.0918274	0.020732	0.0751896	0.988707	190653	0.161832
HC227	Mcc	HC227_Mcc_bin.192	100	69.3219	81.8818	0	4733720	1	9246	0.365532	0.0180704	-0.459316	4.01332	0.3665	0.329	0.3975	0.335	0.3935	0.3425	0.3875	0.992339	8349741	0.0191497	0.0116026	2.75262	19.0567	0.015784	0.007141	0.048208	0.007995	0.040895	0.009136	0.033595	0.96022	269011	0.0317443	0.0176636	1.87477	9.23154	0.027867	0.010025	0.0766175	0.01182	0.06395	0.014304	0.05319	0.96022	264628	0.129822
HC227	Mcc	HC227_Mcc_bin.193	99.8796	71.2445	83.1662	0.120575	3897155	1	7215	0.169629	0.0129197	0.0942832	3.01755	0.1695	0.145	0.1955	0.1485	0.191	0.153	0.186	0.879549	2734291	0.0331379	0.0136757	1.59893	6.88426	0.029827	0.016172	0.0691048	0.017707	0.060326	0.019696	0.05114	0.673054	52650	0.107741	0.051145	1.38596	5.91314	0.096813	0.0399937	0.237445	0.046261	0.206933	0.0545689	0.174843	0.673054	52650	0.235482
HC227	Mcc	HC227_Mcc_bin.194	100	39.2048	56.3268	0	965189	1	1902	0.200857	0.0178052	-0.192589	3.60186	0.202	0.1615	0.2335	0.169	0.2275	0.178	0.222	1	385881	0.0839241	0.0384651	1.89521	8.43308	0.074175	0.039044	0.188603	0.043154	0.15909	0.048236	0.132015	1	13366	0.090165	0.0542663	1.80898	7.31624	0.0750265	0.0290421	0.242468	0.0337895	0.202708	0.04031	0.162683	1	13366	0.174428
HC227	Mcc	HC227_Mcc_bin.195	55.2585	21.168	30.6101	80.9676	2054504	1	3760	0.236094	0.0168719	-0.394204	3.44155	0.237	0.201	0.267	0.207	0.262	0.214	0.257	0.900205	543403	0.115746	0.0358315	1.34297	6.31605	0.108981	0.06616	0.205798	0.07178	0.183346	0.078566	0.161588	0.504017	5886	0.0540248	0.0246953	1.22498	5.11997	0.0493135	0.019768	0.117271	0.0229652	0.102237	0.027642	0.086579	0.504017	5886	0.267106
HC227	Mcc	HC227_Mcc_bin.196	75.5394	33.3669	46.2878	32.3812	3194663	1	5127	0.145772	0.0136791	-0.126463	3.07015	0.146	0.118	0.171	0.123	0.1675	0.128	0.1635	0.443669	227475	0.025003	0.0118595	1.59593	6.32853	0.021928	0.0108428	0.0575313	0.012068	0.0495043	0.013644	0.040758	0.159919	1596	0.112803	0.0470808	1.02832	4.51131	0.10487	0.0444936	0.231589	0.0502852	0.198768	0.0598555	0.173374	0.159919	1596	0.228744
HC227	Mcc	HC227_Mcc_bin.197	96.5828	12.5395	22.1972	3.53814	1155646	1	2180	0.244888	0.015992	0.125675	3.29057	0.2445	0.216	0.276263	0.220475	0.271025	0.2255	0.2655	0.950522	299925	0.121371	0.0422725	1.34955	6.02103	0.111773	0.0659651	0.226791	0.071682	0.202556	0.078601	0.178132	0.76007	6903	0.10269	0.0479364	1.31489	5.29443	0.092641	0.0387222	0.228898	0.0450868	0.198909	0.0529696	0.165811	0.76007	6903	0.293117
HC227	Mcc	HC227_Mcc_bin.198	100	92.1769	95.9292	0	3149048	1	6164	0.200152	0.0142165	-0.0854606	3.25548	0.2005	0.172	0.2275	0.1765	0.223	0.182	0.218	0.989043	3812941	0.0542247	0.0218431	3.06379	20.4407	0.049532	0.029351	0.105982	0.031863	0.091046	0.03499	0.077448	0.958831	127260	0.0608279	0.0291527	2.04852	10.8641	0.0553765	0.023366	0.134097	0.027022	0.112231	0.031879	0.0940211	0.958831	127260	0.268041
HC227	Mcc	HC227_Mcc_bin.199	99.3476	95.8002	97.5416	0.656719	3195791	1	6360	0.295395	0.0150458	-0.610998	6.08872	0.296	0.2635	0.323512	0.2715	0.3185	0.278	0.313	0.998012	4800351	0.0575547	0.0262887	3.60163	26.0695	0.05156	0.030259	0.12173	0.032818	0.100353	0.03605	0.083142	0.992408	185745	0.0703308	0.0339565	1.63259	7.59147	0.063237	0.026104	0.156561	0.030379	0.134368	0.035862	0.113226	0.992408	185745	0.24485
HC227	Mcc	HC227_Mcc_bin.19	100	5.95485	11.2404	0	402210	1	545	0.345105	0.014993	-0.263249	2.85941	0.3465	0.314	0.3717	0.3201	0.3684	0.326	0.364	-1	1	1	NA	NA	NA	1	1	1	1	1	1	1	-1	1	1	NA	NA	NA	1	1	1	1	1	1	1	-1	1	1
HC227	Mcc	HC227_Mcc_bin.1	42.0385	1.30166	2.52514	137.877	296304	1	549	0.310002	0.0191935	-0.462995	3.78085	0.3115	0.2665	0.34615	0.2729	0.3388	0.285	0.332	0.832135	17766	0.0406069	0.0183189	1.52208	6.82052	0.0368235	0.0158426	0.0886204	0.0196773	0.0766348	0.0228225	0.0630885	0.726467	465	0.0763139	0.0342733	1.29794	5.83021	0.071049	0.0247728	0.167069	0.032424	0.142461	0.0392332	0.115161	0.726467	465	0.273262
HC227	Mcc	HC227_Mcc_bin.200	98.0722	78.4211	87.1527	1.96572	4798934	1	9472	0.287854	0.027068	-1.1604	5.65309	0.2915	0.221887	0.3305	0.238	0.324	0.254	0.3175	0.996607	9774831	0.0870097	0.0930137	3.53747	17.0907	0.058021	0.026123	0.407476	0.029291	0.277263	0.03346	0.152592	0.98889	350703	0.0384873	0.0282235	5.98038	63.4164	0.032371	0.0132596	0.0946899	0.015394	0.076808	0.018188	0.0624998	0.98889	350703	0.15388
HC227	Mcc	HC227_Mcc_bin.201	97.5466	74.1243	84.2376	2.51515	2708676	1	5101	0.203656	0.0174733	-0.209355	3.06453	0.2045	0.1675	0.2365	0.1735	0.231	0.1805	0.2255	0.924748	1666225	0.0506263	0.0214294	1.87033	8.40706	0.045195	0.02527	0.108855	0.027662	0.0940398	0.030649	0.0778046	0.748953	37401	0.0353007	0.0270159	2.86296	12.6225	0.027639	0.011464	0.125641	0.013369	0.095075	0.015731	0.059189	0.748953	37401	0.19107
HC227	Mcc	HC227_Mcc_bin.202	100	31.9246	48.3982	0	1504117	1	2994	0.253682	0.0171705	-0.847012	4.70988	0.2555	0.21	0.282087	0.223	0.2785	0.233	0.273	1	1059240	0.0839411	0.0621152	3.18515	14.8896	0.065803	0.033869	0.311455	0.037309	0.194538	0.041675	0.136616	0.99158	40755	0.0314351	0.0313347	4.30889	24.9113	0.023438	0.00872685	0.129115	0.010261	0.0667802	0.012281	0.0515314	0.99158	40755	0.214981
HC227	Mcc	HC227_Mcc_bin.203	100	61.1498	75.8919	0	3522297	1	6992	0.326532	0.0191953	-1.53154	9.92302	0.3285	0.284	0.357	0.295	0.353	0.305	0.34795	1	5649841	0.0397071	0.0442379	9.38385	114.389	0.031483	0.015791	0.102639	0.017498	0.074611	0.019724	0.05848	0.996348	212226	0.0550045	0.0323477	2.29925	11.1628	0.046995	0.0187726	0.143286	0.0218633	0.114973	0.02594	0.092118	0.996348	212226	0.188661
HC227	Mcc	HC227_Mcc_bin.204	100	72.4004	83.991	0	2640282	1	5213	0.212314	0.0191704	0.0321307	3.31411	0.212	0.1745	0.2495	0.1815	0.244	0.189	0.237	0.9961	2978020	0.0661412	0.0352056	3.28107	24.0938	0.056615	0.030554	0.154481	0.033447	0.129444	0.037127	0.105916	0.98439	106953	0.100929	0.046073	1.57822	7.42071	0.092354	0.038703	0.218244	0.04492	0.18551	0.053189	0.157046	0.98439	106953	0.164666
HC227	Mcc	HC227_Mcc_bin.205	100	8.2821	15.2973	0	226732	1	451	0.197845	0.0143953	0.120665	3.08863	0.1975	0.17025	0.227375	0.17375	0.22225	0.1795	0.216	1	23653	0.0442936	0.0160576	1.0194	4.96752	0.041552	0.0195383	0.0842718	0.024011	0.075282	0.0277954	0.0652934	1	861	0.0790549	0.0310962	0.656933	3.38313	0.0756	0.029565	0.153152	0.034681	0.137597	0.042142	0.12102	1	861	0.166043
HC227	Mcc	HC227_Mcc_bin.206	99.4175	97.5856	98.4931	0.585884	3447036	1	6845	0.302821	0.0153084	-1.31624	8.27862	0.304	0.2685	0.328	0.2775	0.324	0.2855	0.319	1	5443350	0.0562262	0.0297801	6.29755	72.7664	0.050301	0.028516	0.116013	0.031084	0.096945	0.034361	0.081076	0.997386	205761	0.0766543	0.0371056	1.31849	5.36238	0.068437	0.027726	0.171505	0.032272	0.150665	0.038182	0.126984	0.997386	205761	0.22125
HC227	Mcc	HC227_Mcc_bin.207	97.282	89.6324	93.3007	2.79392	4672618	1	9219	0.210674	0.0224395	-0.00904501	3.37024	0.2105	0.165	0.255	0.173	0.247	0.1825	0.239	0.997641	9247150	0.108861	0.062734	2.23053	9.84178	0.091503	0.042478	0.289725	0.04771	0.233615	0.054574	0.183101	0.986272	327645	0.0704342	0.0380744	1.75381	7.8493	0.061148	0.0240861	0.17037	0.0281504	0.143966	0.033496	0.119241	0.986272	327645	0.226632
HC227	Mcc	HC227_Mcc_bin.208	100	71.2214	83.1922	0	2520527	1	5015	0.296216	0.0229913	-2.0958	10.4189	0.3	0.233675	0.3275	0.2595	0.323	0.2735	0.3185	1	2975580	0.0913928	0.108464	3.59728	16.1821	0.058965	0.029067	0.521437	0.032257	0.319144	0.036458	0.14757	1	114003	0.0458085	0.0346823	3.00722	16.2434	0.036129	0.0133501	0.147366	0.0156821	0.112704	0.018829	0.0813498	1	114003	0.210859
HC227	Mcc	HC227_Mcc_bin.209	55.8595	6.27769	11.2869	79.0205	781834	1	1485	0.286933	0.0160907	-0.304772	3.22042	0.288	0.2525	0.3155	0.2591	0.311	0.266	0.306	0.974686	148785	0.0808957	0.0320128	1.38899	6.0245	0.075009	0.0378232	0.166113	0.0423692	0.143905	0.0478974	0.121029	0.74474	3240	0.100581	0.0452439	1.20867	5.58925	0.0927575	0.0364443	0.207699	0.0432917	0.183894	0.0517364	0.159042	0.74474	3240	0.314934
HC227	Mcc	HC227_Mcc_bin.20	99.4577	48.5156	65.2179	0.545212	3289127	1	5874	0.193456	0.0150441	-0.173445	3.41168	0.194	0.1625	0.222	0.1675	0.217	0.174	0.212	0.783869	1067991	0.0529051	0.0251168	1.75921	7.57613	0.047008	0.022483	0.120539	0.025127	0.101893	0.028612	0.084175	0.446832	12720	0.0931703	0.0517963	1.38348	4.94064	0.079403	0.0294576	0.230991	0.0349632	0.205098	0.042132	0.167836	0.446832	12720	0.221737
HC227	Mcc	HC227_Mcc_bin.210	96.5375	74.9183	84.3649	3.58668	3865543	1	7321	0.31867	0.0151263	-0.901071	6.54675	0.3195	0.287	0.3455	0.2935	0.341	0.3005	0.336	0.952388	3581826	0.033665	0.0198743	8.20042	130.59	0.029613	0.015476	0.075588	0.017096	0.062631	0.019197	0.051101	0.808548	83845	0.0452899	0.0240812	1.86791	8.32323	0.039734	0.015992	0.110826	0.0186674	0.0923684	0.02222	0.0748582	0.808548	83845	0.195308
HC227	Mcc	HC227_Mcc_bin.211	95.1631	75.506	84.2025	5.08276	5032000	1	9859	0.315202	0.0286265	-1.26107	5.11087	0.321	0.236725	0.357	0.2555	0.351	0.277	0.3445	0.994057	9765990	0.0666242	0.0906141	3.16181	13.8328	0.034088	0.013752	0.377994	0.015501	0.275145	0.017868	0.155652	0.958178	326028	0.0490094	0.0383101	2.43545	10.8875	0.0370405	0.0132147	0.163656	0.015533	0.133087	0.018673	0.0960789	0.958178	326028	0.160803
HC227	Mcc	HC227_Mcc_bin.212	100	95.2045	97.5433	0	2016815	1	4014	0.192131	0.0193211	-0.286209	3.35448	0.1935	0.1505	0.228337	0.158	0.222	0.1675	0.2155	1	1915903	0.0745488	0.0341841	1.80401	7.84051	0.066701	0.032561	0.169336	0.036568	0.141397	0.041683	0.116285	1	73920	0.133888	0.0638304	1.37422	5.68172	0.120781	0.048753	0.30104	0.0569649	0.259929	0.0675969	0.217337	1	73920	0.240662
HC227	Mcc	HC227_Mcc_bin.213	100	89.9369	94.7019	0	3710772	1	7393	0.300661	0.0156793	-0.286529	3.88448	0.301	0.268	0.3305	0.275	0.3255	0.2815	0.3205	1	6561253	0.0527027	0.0264458	3.16096	19.2914	0.046562	0.025007	0.125439	0.027589	0.098868	0.030896	0.078475	0.997732	253116	0.0445619	0.024155	2.72558	16.1759	0.039373	0.01665	0.105287	0.019321	0.0855575	0.022757	0.070306	0.997732	253116	0.245836
HC227	Mcc	HC227_Mcc_bin.214	88.8701	24.5914	38.523	12.5237	3570692	1	5962	0.181315	0.0127499	-0.114625	3.11133	0.1815	0.1555	0.205487	0.16	0.2015	0.165	0.1975	0.547452	383250	0.0405524	0.0153676	1.30185	5.63135	0.037424	0.019938	0.0796638	0.0219545	0.0703635	0.024497	0.060726	0.194458	2211	0.0684529	0.0349239	1.13593	4.19364	0.060007	0.022623	0.155673	0.026397	0.141249	0.031865	0.118595	0.194458	2211	0.247222
HC227	Mcc	HC227_Mcc_bin.215	99.1049	34.5519	51.2396	0.903222	1231096	1	2451	0.180323	0.0145077	-0.368854	3.33136	0.1815	0.1475	0.206875	0.154	0.202	0.161	0.1975	1	714610	0.0382212	0.0130422	1.18059	5.19626	0.035673	0.0200852	0.070734	0.022091	0.063357	0.024489	0.055584	1	27495	0.0896293	0.0585691	2.27535	9.87509	0.073141	0.0282282	0.257767	0.0332614	0.205674	0.0398924	0.158211	1	27495	0.272853
HC227	Mcc	HC227_Mcc_bin.216	80.794	4.36856	8.28894	23.7716	243782	1	473	0.321124	0.016206	-0.392316	3.88153	0.321	0.2832	0.3495	0.2928	0.3459	0.303	0.3415	1	19701	0.0329966	0.0140543	1.34615	5.74672	0.030281	0.013727	0.07126	0.016544	0.062105	0.019039	0.051417	0.90167	528	0.0663202	0.0313707	0.889445	3.99696	0.0608485	0.0177026	0.13749	0.025149	0.123051	0.0315196	0.109557	0.90167	528	0.22731
HC227	Mcc	HC227_Mcc_bin.217	54.407	1.79785	3.48068	83.7998	374409	1	696	0.288776	0.0164085	-0.103108	3.29038	0.2895	0.256875	0.319625	0.2615	0.315125	0.267	0.309	0.9372	26796	0.0824618	0.0308852	0.929066	4.31852	0.0770245	0.0362759	0.15805	0.042951	0.141768	0.049773	0.12484	0.666549	496	0.101822	0.0392996	0.750153	3.71712	0.097036	0.0407838	0.191073	0.0474173	0.175408	0.0583125	0.153583	0.666549	496	0.354533
HC227	Mcc	HC227_Mcc_bin.218	100	57.0007	72.6121	0	1723466	1	3394	0.134465	0.0169205	0.138568	2.74395	0.1335	0.103413	0.1675	0.1075	0.163	0.113	0.157	0.9944	1230096	0.0186691	0.0116948	2.36559	10.6968	0.015285	0.006787	0.0524856	0.007705	0.042299	0.008913	0.03254	0.991167	43071	0.116471	0.058642	1.49126	6.23732	0.103654	0.040734	0.271409	0.0478355	0.231681	0.056878	0.19116	0.991167	42778	0.167792
HC227	Mcc	HC227_Mcc_bin.219	99.7106	19.9572	33.2579	0.290216	2102322	1	3499	0.316561	0.0119617	-0.964432	8.43633	0.317	0.2935	0.3375	0.2985	0.3345	0.303	0.331	0.512566	101475	0.0354737	0.0174345	4.33033	31.1965	0.032005	0.0183639	0.0736093	0.020231	0.0585456	0.022381	0.0493456	0.154287	496	0.0441565	0.0226469	1.29371	5.91325	0.0392825	0.0126554	0.0980524	0.016834	0.0880853	0.020474	0.0774235	0.154287	496	0.182537
HC227	Mcc	HC227_Mcc_bin.21	98.2053	88.6757	93.1975	1.82745	4665052	1	8989	0.196344	0.0171159	-0.228129	2.95594	0.197	0.161	0.2275	0.167	0.223	0.1735	0.218	0.969788	6780403	0.0541005	0.0210118	1.70972	7.84667	0.049314	0.027621	0.108907	0.030183	0.094759	0.033438	0.080768	0.905528	196878	0.0789913	0.0605436	2.6336	11.1881	0.061384	0.0233529	0.279602	0.027478	0.210166	0.032994	0.141424	0.905528	196878	0.19254
HC227	Mcc	HC227_Mcc_bin.220	100	41.7787	58.9351	0	1047907	1	2074	0.263389	0.0213993	-0.91391	5.26303	0.2655	0.209413	0.301	0.226	0.2945	0.238	0.2875	1	479710	0.156255	0.0703998	1.98138	9.05432	0.139952	0.071359	0.349377	0.079931	0.292938	0.090641	0.240179	1	17391	0.124612	0.0559912	1.34315	6.48899	0.114628	0.045962	0.256487	0.0537605	0.225198	0.064308	0.195717	1	17391	0.247938
HC227	Mcc	HC227_Mcc_bin.221	47.2871	26.167	33.6907	111.474	2243588	1	4186	0.226561	0.0155895	-0.291594	3.33284	0.22725	0.194	0.2555	0.2	0.251	0.2065	0.2455	0.895337	950131	0.108495	0.0342386	1.52633	7.56969	0.101977	0.061945	0.193733	0.067145	0.172205	0.073498	0.151315	0.698573	18915	0.0530028	0.0261201	1.69433	7.90351	0.04775	0.0191727	0.12209	0.0224335	0.102848	0.0267658	0.08501	0.698573	18915	0.278446
HC227	Mcc	HC227_Mcc_bin.222	100	38.2121	55.2949	0	3363620	1	6011	0.211063	0.0132602	-0.083196	3.51029	0.2115	0.1845	0.236	0.189	0.232	0.194	0.2275	0.800745	1006071	0.0777579	0.026439	1.40166	6.13646	0.072299	0.0424527	0.145387	0.046043	0.129203	0.050571	0.112202	0.37706	10011	0.0655838	0.028825	1.44174	6.51286	0.060266	0.0256567	0.138258	0.0296645	0.118359	0.035236	0.10074	0.37706	10011	0.235917
HC227	Mcc	HC227_Mcc_bin.223	100	95.4816	97.6886	0	4342802	1	8538	0.236117	0.023074	-1.0488	4.641	0.24	0.1775	0.2715	0.1905	0.2665	0.2055	0.261	0.996518	7575778	0.135097	0.058502	1.78364	7.54892	0.119883	0.066006	0.294602	0.072366	0.252116	0.080243	0.209867	0.971879	260281	0.0632756	0.0323006	2.36392	14.247	0.0568	0.023334	0.141817	0.02713	0.119249	0.032044	0.100109	0.971879	260281	0.211712
HC227	Mcc	HC227_Mcc_bin.224	44.8756	2.27802	4.33593	122.838	342316	1	651	0.229993	0.0297962	-0.192645	2.60253	0.23	0.16975	0.281375	0.179	0.27475	0.19	0.2695	0.958801	28680	0.185122	0.0935263	1.20939	4.60879	0.162245	0.058452	0.426531	0.0745956	0.378814	0.0917088	0.317486	0.822199	703	0.107509	0.0615675	1.20365	4.43109	0.095422	0.0237748	0.276714	0.0334924	0.238274	0.0439528	0.188688	0.822199	703	0.272832
HC227	Mcc	HC227_Mcc_bin.225	99.848	61.2238	75.905	0.152201	7604519	1	13697	0.36235	0.0172435	-0.663343	4.28528	0.364	0.3252	0.3915	0.3325	0.3875	0.3405	0.383	0.809968	7036876	0.0238556	0.0142122	2.17808	10.6427	0.019782	0.008794	0.061607	0.009839	0.052172	0.011259	0.042031	0.526267	104196	0.0664042	0.0317189	1.03293	4.52081	0.0606695	0.0213546	0.142264	0.0254915	0.12598	0.031072	0.109306	0.526267	100576	0.153445
HC227	Mcc	HC227_Mcc_bin.226	100	85.476	92.1693	0	2510868	1	4856	0.316317	0.0159421	-0.452105	5.38578	0.3165	0.285	0.3465	0.2905	0.341	0.297	0.3355	0.988453	2061465	0.0383728	0.0254137	5.60163	49.8505	0.032945	0.01761	0.0951564	0.019394	0.0708458	0.021681	0.055668	0.92792	59340	0.0436893	0.0259655	3.17717	19.5204	0.0377725	0.0161415	0.113743	0.0187619	0.0880789	0.021952	0.0687475	0.92792	59340	0.164331
HC227	Mcc	HC227_Mcc_bin.227	93.7554	3.24697	6.27656	6.66049	479161	1	860	0.290271	0.013314	0.212723	3.52103	0.2895	0.266238	0.316	0.269475	0.312025	0.2735	0.30755	0.812986	21945	0.0637016	0.0193522	1.06311	6.17472	0.061183	0.0341374	0.111334	0.0390802	0.098769	0.0437922	0.0867632	0.353115	171	0.092593	0.0429816	1.14891	4.4885	0.083496	0.029788	0.212505	0.0392025	0.186029	0.042789	0.137184	0.353115	171	0.359069
HC227	Mcc	HC227_Mcc_bin.228	96.0337	37.2211	53.6488	4.13009	1257510	1	2406	0.128537	0.0156747	0.287563	3.41759	0.1275	0.1005	0.1595	0.1045	0.155	0.109	0.1495	0.949398	466095	0.0214466	0.0227185	3.2693	13.7677	0.014765	0.006233	0.107024	0.007091	0.086418	0.008228	0.033902	0.844415	13041	0.114123	0.0649481	1.33963	4.95837	0.097412	0.034215	0.285004	0.040483	0.246338	0.049158	0.20607	0.844415	13041	0.183754
HC227	Mcc	HC227_Mcc_bin.229	98.466	57.3404	72.4756	1.55788	6628863	1	12156	0.352346	0.0155463	-0.499002	3.84585	0.3535	0.3195	0.3795	0.326	0.376	0.3325	0.3715	0.869202	6543153	0.0214213	0.00971844	2.45779	14.1519	0.019276	0.010016	0.0463322	0.011076	0.038562	0.01245	0.03227	0.603898	105570	0.0446051	0.0222512	1.7415	8.65298	0.0401755	0.0156132	0.100205	0.0182798	0.0850686	0.0219359	0.0716221	0.603898	104653	0.12444
HC227	Mcc	HC227_Mcc_bin.22	100	86.8901	92.9853	0	3462620	1	6688	0.318281	0.0180881	-1.14826	7.34494	0.3195	0.278	0.3485	0.287675	0.344	0.297	0.3385	0.975415	3882291	0.0502499	0.0353372	5.80617	54.78	0.042142	0.021431	0.123241	0.02375	0.098555	0.026742	0.077963	0.920468	116403	0.0476955	0.0277099	1.98414	8.5139	0.040618	0.016099	0.126642	0.0187091	0.104183	0.022316	0.08139	0.920468	116403	0.157866
HC227	Mcc	HC227_Mcc_bin.230	22.9951	0.802241	1.55039	334.875	378463	1	705	0.277896	0.0190087	-0.121944	3.45101	0.279	0.237	0.3176	0.2442	0.3095	0.2527	0.3015	0.906488	23436	0.109383	0.0514394	2.28151	10.2661	0.098221	0.0475076	0.273016	0.05729	0.209787	0.0659105	0.159636	0.670319	406	0.14017	0.0583838	0.827788	4.31815	0.133055	0.0456416	0.271857	0.0578362	0.23877	0.0724855	0.217696	0.670319	406	0.356963
HC227	Mcc	HC227_Mcc_bin.231	99.7842	86.2963	92.5514	0.21627	6475514	1	12460	0.338222	0.0187442	-1.49395	9.06829	0.3405	0.295	0.368	0.3065	0.364	0.317	0.3585	0.976928	12718446	0.0265026	0.0206863	6.21991	64.4694	0.021349	0.011297	0.074163	0.012427	0.056902	0.013888	0.042093	0.895006	350703	0.0340533	0.0195732	2.2635	10.9004	0.029335	0.01178	0.0884653	0.0137151	0.071308	0.016326	0.056349	0.895006	350703	0.12755
HC227	Mcc	HC227_Mcc_bin.232	100	26.7569	42.2176	0	1419587	1	2828	0.286846	0.0136768	-0.788408	4.68389	0.2885	0.2575	0.31	0.2635	0.306	0.2695	0.303	1	961191	0.0593276	0.01869	1.34496	7.47391	0.056064	0.032641	0.103987	0.035731	0.0940595	0.03943	0.083547	1	37675	0.0509842	0.0215995	0.970382	4.39485	0.047572	0.0188839	0.102709	0.0221497	0.0917179	0.0266732	0.0797618	1	37675	0.225697
HC227	Mcc	HC227_Mcc_bin.233	100	15.3019	26.5423	0	651240	1	1299	0.225418	0.0206485	-1.02102	5.70881	0.2275	0.176225	0.2575	0.1909	0.25305	0.202	0.2485	1	203203	0.0841392	0.0441638	2.40197	11.6246	0.070625	0.0397721	0.207238	0.0437391	0.173785	0.0483282	0.13942	1	7750	0.0491595	0.0297246	2.05843	8.26797	0.041432	0.0162698	0.142049	0.0193985	0.113526	0.0227362	0.0829653	1	7750	0.224323
HC227	Mcc	HC227_Mcc_bin.234	97.9888	90.9609	94.3442	2.05247	3417135	1	6736	0.343787	0.0178044	-0.713804	5.38139	0.3445	0.306	0.376	0.3145	0.3705	0.323	0.365	0.996936	4896885	0.0239777	0.0159876	4.28197	35.6974	0.019688	0.009872	0.066195	0.010977	0.050506	0.012397	0.039292	0.989539	172578	0.0462867	0.0287077	2.21855	10.3094	0.038701	0.0149334	0.128699	0.017516	0.10401	0.0209127	0.0802146	0.989539	172578	0.155829
HC227	Mcc	HC227_Mcc_bin.235	100	99.1364	99.5663	0	2869550	1	5705	0.189405	0.0151809	-0.195596	3.69154	0.19	0.1575	0.217	0.1625	0.213	0.1695	0.208	1	3815703	0.0450209	0.0180777	2.21888	11.6597	0.04088	0.02347	0.091694	0.025591	0.078454	0.0282272	0.066256	0.992978	144991	0.122958	0.0527831	1.21182	5.29625	0.113656	0.0479388	0.25632	0.055751	0.224014	0.065879	0.191454	0.992978	144991	0.222432
HC227	Mcc	HC227_Mcc_bin.236	95.1442	45.3444	61.4179	5.10367	5273286	1	9242	0.33196	0.0157421	-1.08979	6.8533	0.3335	0.296513	0.358	0.3055	0.3545	0.313	0.35	0.680797	2355535	0.0270515	0.0232288	8.19996	105.329	0.02218	0.011961	0.0722653	0.013159	0.052167	0.0146814	0.039608	0.424012	36315	0.038197	0.0203828	2.04802	9.81469	0.033651	0.0135567	0.0904182	0.0157568	0.0742132	0.0186954	0.0620556	0.424012	36315	0.156536
HC227	Mcc	HC227_Mcc_bin.237	78.0475	20.2532	32.1608	28.127	6937980	1	10926	0.360368	0.0165223	-0.511603	3.74559	0.3615	0.3245	0.3895	0.3315	0.385	0.339	0.38	0.349445	490545	0.0229771	0.0105284	1.43341	5.84088	0.020742	0.009418	0.0509564	0.010617	0.044196	0.012187	0.036829	0.0862092	1891	0.0659409	0.0292678	0.688747	3.18749	0.06178	0.0222025	0.130264	0.0260725	0.120526	0.031497	0.10626	0.0862092	1891	0.157551
HC227	Mcc	HC227_Mcc_bin.238	100	28.8833	44.8208	0	948685	1	1891	0.263113	0.0262504	-0.895829	3.97787	0.2675	0.195375	0.3045	0.2115	0.299	0.228	0.2925	1	432915	0.184526	0.103863	1.52016	5.69707	0.157814	0.063119	0.469481	0.0723547	0.401148	0.084448	0.324153	1	16653	0.0883479	0.053367	1.49686	6.47247	0.07526	0.0225443	0.217432	0.0276512	0.189373	0.0344326	0.159116	1	16653	0.279719
HC227	Mcc	HC227_Mcc_bin.239	100	96.46	98.1981	0	4368465	1	8708	0.285146	0.016532	-1.35089	7.44152	0.287	0.245	0.311	0.256	0.307	0.2655	0.303	1	9174186	0.0982094	0.0734912	3.69486	19.6456	0.077212	0.044066	0.332372	0.047937	0.24197	0.052849	0.150134	0.99804	354903	0.0541363	0.02907	2.51357	16.199	0.047818	0.019333	0.127845	0.02251	0.106466	0.026732	0.08754	0.99804	354903	0.227784
HC227	Mcc	HC227_Mcc_bin.23	74.9728	9.00736	16.0825	33.3818	1200033	1	2109	0.343048	0.0158847	-0.895158	5.2817	0.3445	0.3075	0.36915	0.316	0.3658	0.3235	0.361	0.692333	152076	0.0187639	0.0106251	2.45718	13.2042	0.015947	0.00726587	0.0457601	0.008254	0.038785	0.009524	0.031831	0.507228	2926	0.0403969	0.0178799	1.10819	4.83164	0.037096	0.014923	0.0855384	0.0172043	0.0747473	0.020797	0.064117	0.507228	2926	0.153512
HC227	Mcc	HC227_Mcc_bin.240	99.5246	90.8838	95.0081	0.47766	3458377	1	6803	0.333074	0.0162629	-0.322998	4.15219	0.333	0.301	0.364	0.307	0.359	0.3135	0.3535	0.994546	4875003	0.0242766	0.0118832	2.84281	17.8388	0.021404	0.011273	0.055223	0.012436	0.045786	0.013943	0.037331	0.97717	171405	0.0260293	0.0150497	3.00314	18.6459	0.022689	0.0093221	0.0607469	0.0108582	0.0504358	0.012824	0.041962	0.97717	171405	0.140528
HC227	Mcc	HC227_Mcc_bin.241	98.0481	89.6041	93.6361	1.99073	4386522	1	8701	0.330265	0.0171922	-0.498487	4.42332	0.331	0.294	0.36225	0.3015	0.3565	0.309	0.351	0.997824	8729931	0.028938	0.0131664	1.90302	9.54356	0.025952	0.012754	0.0630617	0.014201	0.053983	0.016115	0.045214	0.991402	328455	0.0621029	0.0293552	1.17675	4.93962	0.056206	0.0218423	0.135201	0.02557	0.118903	0.030568	0.101744	0.991402	328455	0.170449
HC227	Mcc	HC227_Mcc_bin.242	99.7957	97.9671	98.8729	0.204758	4042801	1	7998	0.323982	0.0154178	-1.07521	7.5089	0.325	0.2905	0.35	0.299	0.346	0.306	0.3415	0.997468	7157436	0.0265965	0.0140001	3.5836	24.1837	0.023251	0.012722	0.063277	0.013959	0.0500463	0.015541	0.039975	0.988108	262450	0.0560331	0.0267986	1.52275	6.42383	0.050214	0.0211822	0.12697	0.024522	0.109139	0.028894	0.0907272	0.988108	262450	0.173753
HC227	Mcc	HC227_Mcc_bin.243	99.9494	89.896	94.6565	0.0506025	3659862	1	7233	0.340647	0.0209147	-2.28448	15.0725	0.343	0.295	0.372	0.3095	0.3675	0.319	0.362	0.995308	5774901	0.0358642	0.0557643	8.56953	88.1406	0.025064	0.012246	0.107926	0.013635	0.073908	0.01545	0.052549	0.991929	208981	0.0462672	0.0334039	3.12938	17.0402	0.03763	0.014208	0.138262	0.016724	0.105454	0.020014	0.078765	0.991929	208335	0.118857
HC227	Mcc	HC227_Mcc_bin.244	100	89.2228	94.3045	0	2611291	1	5176	0.278845	0.0236885	-1.62664	7.91841	0.283	0.22	0.3125	0.236375	0.3075	0.25	0.303	0.998507	3044278	0.0813899	0.0675892	3.4895	19.0578	0.059642	0.030532	0.276379	0.033536	0.205597	0.037467	0.147551	0.998507	112575	0.0350742	0.0315917	4.24579	28.9041	0.026427	0.0102893	0.117937	0.012028	0.0882299	0.014385	0.0629162	0.998507	112575	0.181311
HC227	Mcc	HC227_Mcc_bin.245	100	10.991	19.8053	0	630785	1	1251	0.319919	0.0225711	-2.01823	11.6041	0.322	0.2685	0.3535	0.28475	0.3475	0.2965	0.343	1	179700	0.0621579	0.0870594	5.75665	39.0266	0.043306	0.0188535	0.332289	0.021494	0.124347	0.0246569	0.089979	1	6555	0.0817355	0.050446	1.45863	5.60872	0.067439	0.0220495	0.211401	0.0264319	0.181991	0.0324114	0.151135	1	6555	0.237701
HC227	Mcc	HC227_Mcc_bin.246	100	8.6235	15.8778	0	283243	1	562	0.27332	0.0179878	-0.671183	4.39504	0.275	0.231513	0.304488	0.238525	0.2995	0.2511	0.2935	1	36315	0.110855	0.0452181	1.11051	4.85147	0.102486	0.0465594	0.226485	0.0545199	0.19854	0.0633654	0.170309	1	1378	0.0682437	0.044466	1.04864	3.20432	0.0539785	0.0153184	0.174227	0.0191502	0.161374	0.0249559	0.141491	1	1378	0.23126
HC227	Mcc	HC227_Mcc_bin.247	100	8.32451	15.3696	0	255521	1	508	0.291098	0.0309725	-1.11052	4.3689	0.297	0.207863	0.336825	0.22685	0.3305	0.24885	0.323	1	30381	0.116779	0.119138	2.122	7.11267	0.070232	0.0242635	0.495176	0.028067	0.416	0.032978	0.283678	1	1128	0.0700595	0.0613059	2.26946	8.37492	0.04823	0.0156789	0.264825	0.0202083	0.220264	0.0237687	0.13899	1	1128	0.139539
HC227	Mcc	HC227_Mcc_bin.248	100	5.13896	9.77556	0	293675	1	581	0.283904	0.0274284	-0.0157489	2.32957	0.283	0.231	0.3345	0.2385	0.329	0.249	0.3215	1	37950	0.115085	0.0662169	0.996426	4.13302	0.101066	0.0236925	0.273792	0.029094	0.24222	0.0395858	0.206381	1	1378	0.0878918	0.0451464	1.07709	4.03929	0.079129	0.0264148	0.205782	0.0315189	0.183989	0.0379973	0.152639	1	1378	0.241234
HC227	Mcc	HC227_Mcc_bin.249	99.4693	78.7671	87.9159	0.533502	2181568	1	4287	0.224469	0.015305	-0.427764	4.17506	0.225	0.1915	0.251925	0.1995	0.2475	0.2055	0.2425	0.994155	1913946	0.118415	0.0390577	1.64962	7.99744	0.11099	0.066002	0.218844	0.071763	0.190409	0.078927	0.165524	0.975526	66795	0.0810067	0.0410292	2.59133	15.7943	0.073068	0.0308771	0.177798	0.035815	0.148788	0.0421898	0.125392	0.975526	66795	0.228685
HC227	Mcc	HC227_Mcc_bin.24	100	82.4922	90.4063	0	2456313	1	4844	0.308368	0.0166468	-1.65303	10.0352	0.31	0.27	0.334962	0.280575	0.3305	0.2905	0.326	0.999262	2545896	0.0526175	0.0393551	5.9096	50.6659	0.043644	0.024159	0.131512	0.026468	0.100819	0.029394	0.078281	0.985241	90951	0.0440668	0.0246435	1.84892	8.06711	0.0378	0.015115	0.111373	0.0175805	0.0943145	0.020868	0.075336	0.985241	90951	0.248834
HC227	Mcc	HC227_Mcc_bin.250	100	19.2039	32.2202	0	714527	1	1413	0.289692	0.0217149	-0.917476	3.88264	0.294	0.23565	0.322	0.2453	0.3175	0.2585	0.313	1	220116	0.0724911	0.0455786	2.74974	13.4745	0.05918	0.0284859	0.200146	0.032312	0.15713	0.03692	0.12284	1	8001	0.0437303	0.0223836	1.55748	6.47877	0.038776	0.014938	0.103436	0.017532	0.089086	0.021397	0.072444	1	8001	0.220324
HC227	Mcc	HC227_Mcc_bin.251	100	59.2921	74.4445	0	2776142	1	5515	0.2481	0.017359	-1.05106	5.93199	0.25	0.208	0.277	0.218	0.2725	0.2275	0.2675	1	3547116	0.0876763	0.0522387	3.01096	15.5612	0.073279	0.038716	0.241315	0.0425507	0.180258	0.047459	0.139109	0.994194	133903	0.0335928	0.0323805	4.86178	33.7038	0.025758	0.00963655	0.114423	0.0113031	0.0739126	0.013599	0.054935	0.994194	133903	0.227649
HC227	Mcc	HC227_Mcc_bin.252	100	13.8641	24.352	0	802692	1	1582	0.310819	0.0201121	-0.663904	5.22897	0.3115	0.271763	0.345	0.277	0.341475	0.286	0.335	0.991252	270480	0.0615103	0.0411631	5.06687	38.528	0.052679	0.025972	0.143039	0.02957	0.11201	0.033877	0.091501	0.981025	9591	0.0799165	0.0390666	1.14064	4.49359	0.071654	0.0271075	0.180383	0.0317185	0.158489	0.037914	0.132236	0.981025	9591	0.244693
HC227	Mcc	HC227_Mcc_bin.253	99.9514	97.2607	98.5877	0.0486602	3855059	1	7624	0.195456	0.0186746	-0.352014	5.617	0.197	0.152	0.2265	0.162	0.2215	0.17215	0.2165	0.996865	6460215	0.0675451	0.0445736	5.82045	59.7472	0.056743	0.029787	0.166313	0.032954	0.133834	0.036914	0.106226	0.994541	233586	0.125053	0.0601742	1.59813	7.50296	0.112517	0.046078	0.278548	0.0535762	0.24007	0.063573	0.201531	0.994541	233586	0.287442
HC227	Mcc	HC227_Mcc_bin.254	99.3659	89.6254	94.2446	0.638128	4891507	1	9660	0.313817	0.0244937	-1.05159	4.94048	0.318	0.252738	0.352	0.2675	0.346525	0.2825	0.34	0.998603	10240075	0.0471045	0.0524225	5.74954	46.6745	0.033043	0.014917	0.158604	0.01668	0.11519	0.019046	0.0821806	0.991311	371091	0.0381145	0.0247498	3.21653	20.4995	0.032217	0.01244	0.0989737	0.014518	0.0800285	0.017342	0.063523	0.991311	371091	0.155907
HC227	Mcc	HC227_Mcc_bin.255	100	96.1688	98.047	0	3667283	1	7244	0.256486	0.0264188	-1.1767	4.85546	0.2615	0.188	0.2935	0.2045	0.2895	0.2215	0.28485	0.996594	5754528	0.105355	0.0737195	2.39224	9.828	0.080451	0.039642	0.333424	0.043633	0.263992	0.048968	0.194284	0.986339	205120	0.0207392	0.0203083	7.88045	89.9643	0.016605	0.006655	0.05406	0.00775995	0.042945	0.0091899	0.0333463	0.986339	205120	0.18304
HC227	Mcc	HC227_Mcc_bin.25	100	13.1505	23.2443	0	329517	1	650	0.25347	0.0222019	-0.962903	4.74783	0.257	0.202113	0.29	0.20995	0.283275	0.2264	0.277	0.995372	46665	0.180054	0.0813442	1.22323	4.74617	0.160605	0.0727882	0.39462	0.0860442	0.345718	0.0989498	0.292334	0.97056	1711	0.125063	0.0640634	0.987512	3.60728	0.108339	0.0397335	0.282258	0.0465465	0.255537	0.056421	0.217848	0.97056	1711	0.274695
HC227	Mcc	HC227_Mcc_bin.26	100	4.71436	9.00422	0	291838	1	532	0.183014	0.015497	0.659646	3.91155	0.1815	0.157275	0.219725	0.1605	0.212	0.1645	0.20295	0.838325	12720	0.0436283	0.0188673	1.65344	6.67964	0.039451	0.0179857	0.0984613	0.0231729	0.0854319	0.0269049	0.0667133	0.620772	231	0.0432565	0.0170824	0.779489	4.03617	0.042254	0.013586	0.0804317	0.0194405	0.075181	0.024585	0.066985	0.620772	231	0.248584
HC227	Mcc	HC227_Mcc_bin.27	93.464	93.1123	93.2878	6.99301	4874946	1	9617	0.328975	0.0179627	-1.59169	9.33131	0.3305	0.288	0.357	0.299	0.353	0.309	0.3485	0.991839	10055370	0.0368539	0.0522884	8.5621	90.713	0.0260045	0.012652	0.11425	0.014025	0.076854	0.015817	0.056846	0.982918	364231	0.0565431	0.0385809	3.39647	21.9214	0.04707	0.018002	0.153713	0.0211285	0.120364	0.02525	0.094791	0.982918	364231	0.182109
HC227	Mcc	HC227_Mcc_bin.28	95.4033	88.3745	91.7545	4.81823	5037726	1	9647	0.347558	0.0173212	-0.724131	6.74934	0.348	0.314	0.3795	0.3205	0.374	0.327	0.3685	0.957222	7390090	0.021579	0.0131673	6.22122	77.1329	0.018783	0.009124	0.048494	0.010156	0.040567	0.011521	0.033676	0.866486	207046	0.0465772	0.0264395	3.88407	35.1153	0.0414	0.016457	0.10408	0.0192082	0.0886573	0.022923	0.0745815	0.866486	206403	0.141039
HC227	Mcc	HC227_Mcc_bin.29	95.619	90.4494	92.9624	4.58169	3232909	1	6384	0.308421	0.0209534	-1.29279	7.46597	0.311	0.259	0.342	0.273	0.337	0.284	0.33135	0.993372	4483515	0.0521393	0.0481358	5.27	46.0025	0.038923	0.018736	0.185202	0.020807	0.129577	0.023544	0.086204	0.979048	162735	0.0601933	0.033963	1.9483	8.74359	0.051384	0.0207394	0.151507	0.0241267	0.127834	0.0286024	0.103402	0.979048	162735	0.229373
HC227	Mcc	HC227_Mcc_bin.2	99.304	91.9285	95.474	0.700926	3484829	1	6823	0.322718	0.0152721	-1.55512	8.01583	0.3245	0.284275	0.346	0.296	0.342	0.306	0.339	0.983952	4668040	0.0342832	0.0313758	5.36358	39.2571	0.026444	0.014092	0.108082	0.01546	0.075693	0.017216	0.052393	0.94865	157641	0.0304767	0.021923	2.96212	15.2547	0.02456	0.00958	0.094498	0.011203	0.070584	0.013328	0.052603	0.94865	157641	0.163205
HC227	Mcc	HC227_Mcc_bin.30	100	73.2301	84.5466	0	2509212	1	4927	0.210063	0.0196195	-0.719217	3.61629	0.2125	0.1635	0.242	0.1725	0.237	0.183	0.2325	0.99699	2496495	0.0929343	0.0400846	1.64235	6.82113	0.082767	0.043892	0.20059	0.048759	0.174264	0.054614	0.146002	0.980499	85078	0.0642137	0.0462693	2.74364	14.7576	0.051412	0.0178159	0.188077	0.0211699	0.150566	0.025756	0.116318	0.980499	85078	0.210349
HC227	Mcc	HC227_Mcc_bin.31	94.0374	74.5466	83.1653	6.34066	4723083	1	9348	0.313072	0.0159617	-1.13128	6.93561	0.3145	0.2755	0.339	0.2855	0.335	0.2945	0.3305	0.996713	9805806	0.0340948	0.0232189	5.17989	43.5612	0.02844	0.015845	0.0915229	0.017309	0.06866	0.019187	0.051347	0.991643	358281	0.0425533	0.0231485	1.94209	8.68297	0.037037	0.01495	0.106996	0.017456	0.088058	0.020703	0.070426	0.991643	358281	0.166145
HC227	Mcc	HC227_Mcc_bin.32	37.1467	2.35056	4.42135	169.203	447422	1	705	0.150912	0.0121419	0.477024	3.85718	0.151	0.1293	0.1775	0.1321	0.1724	0.1365	0.1663	0.353188	1275	0.0262464	0.0100619	0.236783	2.87121	0.025688	0.0063739	0.0472988	0.0120422	0.0439	0.0144714	0.0397994	0.0261364	0	NA	NA	NA	NA	NA	NA	NA	NA	NA	NA	NA	0.0261364	0	NA
HC227	Mcc	HC227_Mcc_bin.33	100	88.6587	93.9885	0	2276058	1	4350	0.366823	0.0171457	-0.868216	6.05569	0.368	0.331	0.395637	0.339	0.392	0.3455	0.387	0.979656	1462905	0.0179062	0.010516	2.64921	12.5304	0.01503	0.007626	0.050043	0.00844	0.039406	0.009489	0.028908	0.875386	36585	0.0555415	0.0299019	1.75809	8.05623	0.049067	0.0180986	0.133345	0.0213964	0.111605	0.0258614	0.0923146	0.875386	23005	0.128691
HC227	Mcc	HC227_Mcc_bin.34	100	79.7093	88.7091	0	1923509	1	3718	0.208184	0.0169248	-0.68233	4.21172	0.2095	0.17	0.2365	0.1785	0.233	0.187	0.2285	0.977486	1194285	0.0383198	0.0148732	1.88388	9.13497	0.034915	0.020065	0.077646	0.021837	0.066697	0.024064	0.056502	0.913774	35778	0.0583794	0.0233169	0.940384	4.3292	0.054722	0.0233207	0.114328	0.0272345	0.101837	0.0319944	0.0895096	0.913774	35778	0.127885
HC227	Mcc	HC227_Mcc_bin.35	100	0.876205	1.73719	0	234649	1	396	0.218431	0.0142906	-0.194999	3.4616	0.219	0.187438	0.246125	0.19475	0.241	0.20075	0.2355	0.44815	903	0.0865745	0.0307713	0.658442	4.95877	0.083133	0.0193326	0.15909	0.0391133	0.141911	0.0568918	0.12466	0.098023	1	0.05888	NA	NA	NA	0.05888	0.05888	0.05888	0.05888	0.05888	0.05888	0.05888	0.098023	1	0.172852
HC227	Mcc	HC227_Mcc_bin.36	100	93.5785	96.6827	0	2520526	1	5015	0.296251	0.0210104	-1.31981	6.61802	0.299	0.243	0.3275	0.2575	0.3235	0.271	0.319	1	2973141	0.0697603	0.0524597	3.26339	16.7964	0.053895	0.027297	0.233692	0.030148	0.170377	0.033855	0.119542	1	113526	0.0474952	0.0372761	2.62361	10.8943	0.0363215	0.0145054	0.170741	0.01689	0.137422	0.0200485	0.084831	1	113526	0.21992
HC227	Mcc	HC227_Mcc_bin.37	96.0604	75.0432	84.261	4.10116	4147932	1	7995	0.261834	0.0255167	-1.04109	4.34054	0.267	0.1965	0.299575	0.2105	0.295	0.2265	0.289	0.980035	5367726	0.119532	0.0850307	2.02785	7.27152	0.088169	0.04275	0.374394	0.047272	0.313331	0.053221	0.238698	0.879929	153181	0.042069	0.0211731	1.94702	9.80996	0.037538	0.0156365	0.096435	0.018114	0.081837	0.021373	0.068001	0.879929	153181	0.165153
HC227	Mcc	HC227_Mcc_bin.38	63.7059	6.5239	11.8358	56.9714	430701	1	824	0.310925	0.0197642	-0.781224	4.71836	0.3135	0.260288	0.342712	0.2785	0.338	0.2865	0.3335	0.937681	52326	0.0486214	0.0212962	2.01472	9.66285	0.0443005	0.0219791	0.107001	0.0253035	0.0889662	0.0287785	0.0724455	0.821649	1431	0.0683432	0.0294828	0.847438	3.90722	0.063354	0.0230178	0.13888	0.028053	0.124252	0.035253	0.10873	0.821649	1431	0.250471
HC227	Mcc	HC227_Mcc_bin.39	100	39.4472	56.5765	0	989384	1	1933	0.190928	0.0163894	-0.013951	3.26059	0.191	0.159	0.22235	0.1635	0.217	0.17	0.2115	1	359128	0.0600511	0.0253317	1.85256	8.56522	0.054652	0.0282122	0.127342	0.0315894	0.109284	0.0356617	0.090579	0.955105	11325	0.0784147	0.033453	1.22136	5.38348	0.072723	0.0304436	0.164551	0.0357394	0.142398	0.0422548	0.121985	0.955105	11325	0.178731
HC227	Mcc	HC227_Mcc_bin.3	100	84.5785	91.645	0	1705674	1	3269	0.167184	0.0157991	0.104403	3.0504	0.1665	0.1375	0.1985	0.142	0.194	0.1475	0.188	0.967508	840456	0.0250468	0.0111248	1.74098	7.62353	0.022277	0.011626	0.0549336	0.0128527	0.047061	0.014401	0.039229	0.916322	23653	0.047864	0.0328999	2.2399	8.76632	0.038031	0.0156516	0.150511	0.0181316	0.12387	0.0214662	0.0889296	0.916322	23653	0.156219
HC227	Mcc	HC227_Mcc_bin.40	100	95.2776	97.5817	0	4284151	1	8475	0.248928	0.0179965	-0.94586	5.73245	0.2505	0.2065	0.279	0.2175	0.27415	0.2277	0.2695	0.998302	8026021	0.105701	0.0473687	2.63403	14.5472	0.09384	0.054182	0.232668	0.058833	0.192477	0.064735	0.158132	0.990649	292995	0.0244318	0.0141758	3.74971	31.5477	0.021474	0.008773	0.0582326	0.010229	0.0475093	0.012104	0.038934	0.990649	292995	0.166544
HC227	Mcc	HC227_Mcc_bin.41	100	57.6565	73.1419	0	2228519	1	4351	0.306507	0.0254228	-1.45175	6.52942	0.3115	0.239375	0.3425	0.2575	0.3385	0.2745	0.3325	0.984504	1817371	0.0640688	0.0651143	4.19207	26.3666	0.044742	0.020134	0.267416	0.0225415	0.176781	0.025771	0.111075	0.954623	60726	0.0531441	0.0337278	2.09595	8.53638	0.043691	0.017405	0.152802	0.0202102	0.126838	0.024025	0.094981	0.954623	60726	0.202642
HC227	Mcc	HC227_Mcc_bin.42	74.6537	14.4328	24.1892	33.9519	3485932	1	5186	0.334791	0.0113024	-0.329068	5.04475	0.335	0.313	0.3565	0.316	0.3525	0.32	0.349	0.19456	25878	0.0194089	0.00596858	0.766132	4.20576	0.0186255	0.0101776	0.0336521	0.011371	0.0307557	0.012715	0.0273952	0.0277805	36	0.0377669	0.0127499	-0.0375977	2.39081	0.040077	0.0147899	0.0592738	0.0179923	0.0581685	0.019586	0.0559575	0.0277805	36	0.166524
HC227	Mcc	HC227_Mcc_bin.43	100	89.9336	94.7001	0	2901609	1	5672	0.225397	0.0235537	-0.314187	3.31482	0.2265	0.176	0.2685	0.1845	0.2615	0.1955	0.2545	0.992344	3151305	0.101336	0.0506907	1.75977	7.40756	0.087682	0.042656	0.238298	0.047553	0.202819	0.053786	0.167209	0.964883	101926	0.0453083	0.0313471	2.15663	8.83744	0.0357995	0.0135441	0.137709	0.0158522	0.111722	0.018919	0.084709	0.964883	101926	0.208543
HC227	Mcc	HC227_Mcc_bin.44	100	96.3612	98.1469	0	3008683	1	5972	0.279495	0.0176238	-0.659825	5.03458	0.281	0.24	0.3105	0.2485	0.3055	0.258	0.3	0.998471	4125628	0.0791602	0.0520948	2.34152	9.82497	0.061672	0.031559	0.229176	0.034723	0.192051	0.038858	0.148153	0.985429	153181	0.0496217	0.0469001	3.44348	16.9649	0.035745	0.014543	0.215781	0.016929	0.133771	0.020017	0.089918	0.985429	153181	0.272048
HC227	Mcc	HC227_Mcc_bin.45	98.8608	79.0667	87.8627	1.15234	1419192	1	2816	0.138204	0.0165982	-0.0112704	3.983	0.138	0.105188	0.168813	0.1105	0.164125	0.117	0.1595	0.997019	914628	0.0171396	0.0117138	4.68178	37.1242	0.014412	0.006805	0.043235	0.007638	0.0338777	0.008736	0.026941	0.993346	34453	0.0818753	0.0436772	1.78907	7.77144	0.072032	0.0281934	0.201912	0.0330868	0.1659	0.0392912	0.134693	0.993346	34453	0.186388
HC227	Mcc	HC227_Mcc_bin.46	94.9461	89.7722	92.2867	5.3229	3652303	1	7209	0.316578	0.0192073	-0.862684	4.20993	0.319	0.2691	0.347	0.28	0.3435	0.2915	0.338	0.996356	5659930	0.0506649	0.0356336	2.69763	13.828	0.040118	0.017318	0.154668	0.019411	0.121872	0.022275	0.090841	0.985766	200028	0.0600062	0.0382134	2.03443	9.56505	0.050014	0.0171617	0.158949	0.0202283	0.131055	0.024512	0.107342	0.985766	200028	0.184344
HC227	Mcc	HC227_Mcc_bin.47	97.7471	19.6226	32.684	2.30486	2197012	1	3490	0.36496	0.0145389	-0.627737	4.83829	0.366	0.336	0.390387	0.34	0.3865	0.346	0.3825	0.373518	52650	0.0154079	0.00623333	1.2946	5.89183	0.014243	0.00672045	0.0312397	0.00766345	0.027518	0.0088649	0.023424	0.0953063	190	0.0579432	0.0341539	1.99532	6.90537	0.047722	0.0204603	0.160578	0.0246544	0.144863	0.0312616	0.0980012	0.0953063	120	0.135178
HC227	Mcc	HC227_Mcc_bin.48	100	85.1778	91.9957	0	2008665	1	3872	0.248974	0.0225691	-0.607495	3.9641	0.251	0.197	0.288	0.2085	0.2825	0.22	0.276	0.980294	1236378	0.0854075	0.0435282	2.45922	12.448	0.0741305	0.0388124	0.203228	0.042642	0.165542	0.04758	0.134486	0.902428	34191	0.0579249	0.0373014	3.19209	17.7393	0.049775	0.019916	0.160828	0.023174	0.115348	0.027507	0.091076	0.902428	34191	0.156933
HC227	Mcc	HC227_Mcc_bin.49	96.4854	94.9619	95.7176	3.64259	3799390	1	7489	0.276348	0.0278563	-0.874584	4.21819	0.28	0.206	0.3215	0.2215	0.3155	0.24	0.3075	0.994435	6004845	0.124621	0.0986835	2.24925	8.70518	0.091022	0.036116	0.43591	0.041065	0.342346	0.0477	0.244301	0.97737	213531	0.0587483	0.0352796	2.33012	12.1008	0.050047	0.019209	0.153944	0.022397	0.124403	0.026745	0.099399	0.97737	213531	0.207723
HC227	Mcc	HC227_Mcc_bin.4	100	7.83018	14.5232	0	219366	1	426	0.206925	0.0201726	-0.00737685	2.88227	0.2065	0.169437	0.2455	0.173	0.240875	0.1815	0.2335	1	16836	0.0928003	0.053898	2.66935	12.0372	0.078987	0.0370736	0.274921	0.0446535	0.194255	0.0514185	0.142724	0.971819	528	0.154746	0.0675335	0.667275	3.12617	0.143991	0.0533966	0.307177	0.0655194	0.280188	0.0755149	0.2508	0.971819	528	0.262847
HC227	Mcc	HC227_Mcc_bin.50	70.176	3.71699	7.06003	42.4989	297411	1	576	0.279237	0.0199204	-0.492835	4.04648	0.281	0.233375	0.314125	0.243875	0.3095	0.25475	0.30175	0.988739	29890	0.1081	0.0584911	2.84469	14.4751	0.096298	0.0422512	0.295305	0.0509579	0.196892	0.0594982	0.160038	0.886659	861	0.104511	0.0551668	0.986427	3.79747	0.092316	0.0268655	0.239882	0.033646	0.217272	0.044922	0.18238	0.886659	861	0.301125
HC227	Mcc	HC227_Mcc_bin.51	98.7849	93.4806	96.0596	1.23006	3539294	1	6893	0.35917	0.0151848	-0.756952	4.46741	0.361	0.3255	0.3845	0.332	0.381	0.3396	0.377	0.986664	4534566	0.0174788	0.0105556	2.85919	14.0477	0.014606	0.00743	0.049922	0.008233	0.0381927	0.009273	0.027905	0.934394	143380	0.0395966	0.0241534	2.40715	12.8002	0.033738	0.0124115	0.102709	0.01468	0.084422	0.017691	0.067235	0.934394	72771	0.166695
HC227	Mcc	HC227_Mcc_bin.52	100	91.3586	95.4842	0	6222708	1	12172	0.231148	0.0177258	-0.621472	3.6597	0.233	0.1895	0.261	0.1985	0.2565	0.208	0.2515	0.996529	14663820	0.108645	0.0446087	2.08368	9.5167	0.097236	0.057746	0.232387	0.062332	0.19565	0.06818	0.162348	0.968375	478731	0.0369813	0.0258546	3.3109	18.3954	0.030423	0.0127542	0.110697	0.014767	0.0826915	0.017377	0.060315	0.968375	478731	0.144786
HC227	Mcc	HC227_Mcc_bin.53	99.1344	99.3949	99.2645	0.873125	4664188	1	9271	0.323966	0.0130338	-0.902661	5.90343	0.325	0.2945	0.346	0.3015	0.3425	0.3085	0.339	0.997396	10104760	0.0328944	0.0145023	5.49902	76.6864	0.029871	0.01768	0.068113	0.019198	0.056473	0.021097	0.046775	0.995672	385003	0.0510109	0.0217609	1.30869	6.22743	0.047358	0.019994	0.103664	0.023198	0.090972	0.02742	0.078613	0.995672	385003	0.198359
HC227	Mcc	HC227_Mcc_bin.54	99.7575	43.2317	60.3219	0.243046	2791354	1	4805	0.360855	0.0176787	-0.0576619	2.91023	0.361	0.327	0.395	0.3325	0.3895	0.338	0.384	0.666223	468996	0.017599	0.0103755	1.68152	6.62487	0.014768	0.005848	0.0461693	0.00667575	0.038796	0.007798	0.031241	0.336449	4656	0.0422127	0.0199978	1.407	6.4233	0.038401	0.0147375	0.0912672	0.017563	0.0794673	0.0209155	0.0672975	0.336449	4656	0.100159
HC227	Mcc	HC227_Mcc_bin.55	55.3606	93.0202	69.4113	80.6338	4629696	1	9081	0.176114	0.0144682	-0.233578	3.48454	0.1765	0.1455	0.203	0.1515	0.199	0.1575	0.1935	0.986673	8472786	0.037413	0.0146119	2.04331	10.4968	0.034351	0.019119	0.075317	0.020974	0.064197	0.023325	0.054477	0.960528	291466	0.149787	0.0605155	0.869605	4.12139	0.141096	0.057781	0.291683	0.0674243	0.262318	0.080136	0.230858	0.960528	291466	0.242912
HC227	Mcc	HC227_Mcc_bin.56	49.5444	90.8874	64.1302	101.839	9640373	1	18920	0.300165	0.0283965	-1.18606	5.26647	0.305	0.2285	0.3425	0.2455	0.337	0.2635	0.3305	0.994689	36718165	0.0646872	0.0798331	4.01516	21.6655	0.040364	0.017624	0.329258	0.019863	0.209496	0.022883	0.117143	0.969637	1247410	0.0405339	0.0267836	2.70709	15.191	0.033864	0.01213	0.112491	0.014359	0.089759	0.017365	0.069872	0.969637	1247410	0.139231
HC227	Mcc	HC227_Mcc_bin.57	100	38.5048	55.6007	0	3297901	1	5848	0.281703	0.0189878	-0.747863	4.44228	0.2835	0.2375	0.3145	0.2475	0.3095	0.25735	0.304	0.752419	852165	0.0615601	0.0293825	2.42504	13.2286	0.054338	0.028223	0.138128	0.031354	0.116082	0.03526	0.0960086	0.364807	7750	0.0246495	0.0113521	1.4046	6.44975	0.022463	0.00920607	0.0528847	0.0107934	0.0463793	0.0126809	0.0393436	0.364807	7750	0.15987
HC227	Mcc	HC227_Mcc_bin.58	94.891	13.3112	23.3473	5.38412	1605486	1	2520	0.327293	0.0160322	-0.510433	3.65985	0.3285	0.292988	0.355	0.299475	0.351025	0.3065	0.347	0.346752	26106	0.0312269	0.0132978	1.63756	8.05036	0.028969	0.0132805	0.0647738	0.015202	0.0559825	0.0177105	0.047177	0.0897217	105	0.0282903	0.012833	0.802376	3.98831	0.027169	0.009097	0.0567038	0.010575	0.0513016	0.013645	0.043438	0.0897217	105	0.146537
HC227	Mcc	HC227_Mcc_bin.59	100	73.0341	84.4158	0	2419176	1	4816	0.247394	0.0210627	-1.11594	5.11889	0.2505	0.192	0.2795	0.206	0.2755	0.222	0.2705	1	2767128	0.122736	0.0671861	2.38098	9.61495	0.10127	0.060558	0.335094	0.065289	0.273324	0.071204	0.202254	0.990952	106491	0.086409	0.039745	1.54517	6.99165	0.078472	0.033312	0.189418	0.0386175	0.161825	0.04545	0.136156	0.990952	106491	0.244509
HC227	Mcc	HC227_Mcc_bin.5	100	20.8353	34.4854	0	1168154	1	2320	0.305472	0.0268732	-0.549508	3.17854	0.3095	0.249488	0.348513	0.2595	0.343	0.271	0.337	1	623286	0.0836063	0.0855861	3.21297	15.4507	0.057185	0.018057	0.38608	0.020881	0.231513	0.024786	0.155188	0.991719	23220	0.0786277	0.0526968	1.84545	7.71783	0.064379	0.0202527	0.219343	0.0243654	0.18283	0.029497	0.145401	0.991719	23220	0.230781
HC227	Mcc	HC227_Mcc_bin.60	51.0211	15.0086	23.1943	95.9972	1590884	1	2904	0.219847	0.0161573	-0.211009	3.03168	0.2205	0.187	0.25	0.192	0.2455	0.199	0.2405	0.870511	313236	0.0969711	0.0323428	1.34717	6.22364	0.090586	0.05312	0.178152	0.0578577	0.158552	0.063645	0.138618	0.52191	4278	0.0518742	0.0269631	1.31002	4.59436	0.045301	0.0179338	0.1231	0.0211411	0.110532	0.0248148	0.0919372	0.52191	4278	0.266441
HC227	Mcc	HC227_Mcc_bin.61	83.704	16.6495	27.7744	19.4686	4892928	1	8084	0.321571	0.0134127	-0.736308	4.53719	0.323	0.2905	0.344	0.2975	0.341	0.3045	0.337	0.505838	549676	0.0323335	0.0160807	2.27402	12.1938	0.028358	0.01414	0.0723341	0.015617	0.061691	0.017565	0.051673	0.139369	1953	0.0604879	0.0285118	0.943401	3.63651	0.05365	0.0212042	0.128727	0.0247634	0.117503	0.0294202	0.101257	0.139369	1953	0.192797
HC227	Mcc	HC227_Mcc_bin.62	95.7583	4.35873	8.33793	4.42956	240120	1	464	0.284	0.021405	-0.660624	4.55557	0.285	0.23565	0.322925	0.246575	0.314925	0.2595	0.307	0.981226	17205	0.120253	0.0826636	2.60573	11.0811	0.095855	0.038936	0.387089	0.050301	0.301984	0.0600332	0.207643	0.855564	435	0.0954044	0.0332383	0.372322	3.35079	0.093161	0.0350077	0.166858	0.043333	0.153349	0.0552028	0.136048	0.855564	435	0.324261
HC227	Mcc	HC227_Mcc_bin.63	92.0125	77.47	84.1174	8.68089	1598131	1	3044	0.189786	0.0126159	-0.260598	3.37889	0.1905	0.163	0.213	0.168	0.2095	0.1735	0.205	0.947233	688551	0.0474597	0.0187979	2.78442	17.4942	0.043412	0.0256128	0.0912012	0.027834	0.078693	0.030559	0.067867	0.828744	18721	0.112966	0.0580714	1.71638	7.66963	0.100558	0.03917	0.26514	0.046106	0.222642	0.055479	0.185596	0.828744	18721	0.253965
HC227	Mcc	HC227_Mcc_bin.64	100	93.2309	96.4969	0	2253984	1	4478	0.257213	0.0196528	-0.972669	5.53222	0.259	0.209962	0.29	0.222425	0.2855	0.2335	0.2795	1	2331720	0.157231	0.0679038	1.82168	7.52392	0.139756	0.078304	0.347496	0.085271	0.295421	0.094142	0.24253	1	87153	0.0832764	0.0441331	2.50565	14.525	0.074251	0.0300134	0.193424	0.0350962	0.157972	0.0418984	0.130936	1	87153	0.23283
HC227	Mcc	HC227_Mcc_bin.65	100	74.1595	85.1628	0	2497736	1	4848	0.290134	0.0181138	-0.870288	5.0926	0.2925	0.25	0.3205	0.2585	0.316	0.2675	0.3105	0.979963	2096128	0.0577696	0.0335238	3.24284	20.7944	0.048897	0.024813	0.144279	0.027387	0.116136	0.030747	0.093202	0.922062	63546	0.0761367	0.0350105	1.45094	6.19654	0.069018	0.0292323	0.168747	0.0337587	0.143487	0.0399455	0.120394	0.922062	63546	0.232193
HC227	Mcc	HC227_Mcc_bin.66	90.7046	71.7226	80.1044	10.248	5620766	1	10620	0.319745	0.0160756	-0.721862	4.48096	0.3215	0.2825	0.3475	0.2905	0.343	0.299	0.3385	0.931477	7603050	0.033079	0.0172174	1.93306	7.73295	0.028322	0.014271	0.083302	0.015728	0.070093	0.017661	0.054702	0.784662	189420	0.0574716	0.0321312	1.45859	5.82743	0.049153	0.018306	0.140573	0.0213349	0.12173	0.0255199	0.101373	0.784662	189420	0.177602
HC227	Mcc	HC227_Mcc_bin.67	100	54.77	70.776	0	2912088	1	5793	0.288587	0.0144888	-0.71301	4.25139	0.29	0.2555	0.3135	0.262	0.3095	0.27	0.3055	1	3971971	0.0584091	0.0248236	3.53218	27.9572	0.052886	0.031555	0.122165	0.034223	0.101244	0.03753	0.083455	0.994692	150975	0.0493473	0.0248867	1.98952	9.98295	0.044088	0.018137	0.114581	0.021189	0.0951569	0.02522	0.0787382	0.994692	150975	0.213608
HC227	Mcc	HC227_Mcc_bin.68	96.1574	95.2905	95.722	3.9962	3907670	1	7649	0.331774	0.0160844	-1.04352	6.92726	0.3325	0.296	0.3595	0.307	0.3555	0.314	0.3505	0.987496	5825991	0.0296378	0.0213383	7.44378	95.848	0.024797	0.013482	0.075942	0.014827	0.057914	0.016521	0.045114	0.957543	191890	0.0329715	0.017995	1.70026	7.10835	0.028564	0.011167	0.0822108	0.0130185	0.0692921	0.015522	0.0560411	0.957543	191890	0.166511
HC227	Mcc	HC227_Mcc_bin.69	84.6381	79.7555	82.1243	18.15	7080133	1	14034	0.310689	0.0132616	-0.337679	4.36562	0.311	0.283413	0.336	0.2885	0.3315	0.2945	0.327	0.997081	22501986	0.0384874	0.0144382	2.19886	13.2632	0.035465	0.020382	0.075059	0.022226	0.064972	0.024557	0.055574	0.986793	841753	0.0590931	0.0274927	1.31256	5.81979	0.053627	0.021651	0.127519	0.025208	0.111533	0.029951	0.095246	0.986793	841753	0.220281
HC227	Mcc	HC227_Mcc_bin.6	70.4375	81.6231	75.6189	41.9698	6606915	1	12728	0.338431	0.0192026	-0.656953	4.81873	0.3395	0.297	0.3725	0.3055	0.367	0.3145	0.361	0.969336	13585078	0.0274909	0.0210387	7.31023	93.2869	0.023317	0.009852	0.069861	0.011123	0.054793	0.012892	0.043564	0.8851	392055	0.0475443	0.0264003	1.40533	5.82593	0.041625	0.014212	0.115625	0.016805	0.09823	0.020368	0.08183	0.8851	392055	0.131429
HC227	Mcc	HC227_Mcc_bin.70	52.2469	89.8972	66.0858	91.3988	5152847	1	9574	0.163281	0.0148823	0.0335771	3.22562	0.163	0.134	0.1925	0.139	0.188	0.144	0.182	0.87101	5308911	0.0347299	0.0146889	2.52961	16.4037	0.031653	0.016903	0.07044	0.01864	0.060349	0.020872	0.051481	0.699003	126253	0.190123	0.0976909	1.37837	5.56555	0.169132	0.0625859	0.450103	0.0738886	0.382782	0.0891102	0.317883	0.699003	126253	0.237294
HC227	Mcc	HC227_Mcc_bin.71	100	12.4181	22.0927	0	557700	1	1094	0.213483	0.014577	-1.06537	5.53659	0.215	0.1795	0.237	0.1865	0.233675	0.19565	0.23	1	122265	0.0938764	0.0491399	2.24182	8.86949	0.079948	0.0437796	0.252153	0.0488192	0.206657	0.0543154	0.147912	0.967448	4095	0.0621366	0.0359916	1.82743	7.20008	0.053692	0.0195745	0.168173	0.0235852	0.138382	0.0282204	0.10548	0.967448	4095	0.209468
HC227	Mcc	HC227_Mcc_bin.72	100	73.8907	84.9852	0	3506070	1	6774	0.197454	0.0174603	-0.498525	3.12353	0.199	0.159	0.227	0.165	0.223	0.174	0.2185	0.984069	3977610	0.0682479	0.0292707	1.46317	6.30172	0.061801	0.030269	0.143336	0.033765	0.125388	0.038374	0.106678	0.92326	115921	0.0703306	0.0360661	1.7582	7.79857	0.062347	0.024941	0.16693	0.029287	0.138369	0.034943	0.114387	0.92326	115921	0.193788
HC227	Mcc	HC227_Mcc_bin.73	100	7.82957	14.5221	0	289667	1	568	0.298333	0.0267857	-1.13297	4.91312	0.302	0.23	0.340062	0.24185	0.333825	0.2642	0.3275	0.98839	32640	0.123894	0.112222	2.4765	9.18059	0.0882045	0.0280635	0.529799	0.0349406	0.393894	0.0435795	0.248008	0.957165	1035	0.121745	0.0656494	1.5281	6.42382	0.108868	0.0335252	0.303506	0.0427426	0.247064	0.0556852	0.20088	0.957165	1035	0.287104
HC227	Mcc	HC227_Mcc_bin.74	100	27.3143	42.9085	0	1916152	1	3723	0.372115	0.0160404	-0.26679	3.4049	0.373	0.339	0.4005	0.3445	0.3965	0.3515	0.3915	0.978567	1300078	0.0152272	0.00889524	2.32772	10.5782	0.012739	0.005974	0.041017	0.006721	0.033155	0.007689	0.025802	0.920747	40186	0.0270919	0.0171307	2.3378	11.5597	0.0225565	0.008429	0.0745239	0.009916	0.059651	0.0119195	0.0468225	0.920747	36856	0.116148
HC227	Mcc	HC227_Mcc_bin.75	99.817	77.9388	87.5316	0.18331	4950181	1	9684	0.26226	0.0220455	-0.991601	4.7073	0.2655	0.2085	0.2965	0.2205	0.292	0.234	0.287	0.994412	9294516	0.109095	0.0674699	2.22835	9.38093	0.088043	0.042526	0.304936	0.047123	0.249889	0.053295	0.194196	0.967722	310078	0.0355483	0.0248736	2.88587	14.6913	0.028863	0.011289	0.107734	0.0131608	0.0791952	0.015686	0.060932	0.967722	310078	0.198232
HC227	Mcc	HC227_Mcc_bin.76	100	87.3445	93.2448	0	3234896	1	6338	0.321636	0.0157437	-0.799193	5.23054	0.323	0.287	0.349	0.295	0.345	0.3025	0.34	0.995305	4008696	0.0329732	0.0173175	2.72257	14.5835	0.028415	0.01506	0.080098	0.016566	0.065181	0.018512	0.052172	0.970503	130305	0.0451912	0.0253567	1.72376	7.02286	0.038813	0.0151036	0.11555	0.0175802	0.0977036	0.0209534	0.0777076	0.970503	130305	0.171424
HC227	Mcc	HC227_Mcc_bin.77	90.051	8.05879	14.7937	11.0482	439972	1	868	0.216242	0.0155056	-0.257044	3.31245	0.217	0.1835	0.2455	0.1915	0.2415	0.19685	0.2355	0.989315	79800	0.116408	0.0366406	0.958604	5.45968	0.111928	0.058861	0.202973	0.0670208	0.182473	0.076321	0.162328	0.989315	2850	0.103419	0.041941	0.808973	3.94753	0.097911	0.040064	0.202671	0.046779	0.181951	0.0542671	0.158274	0.989315	2850	0.289327
HC227	Mcc	HC227_Mcc_bin.78	100	88.5175	93.9091	0	2155102	1	4241	0.195612	0.0164456	-0.59042	4.0389	0.197	0.157	0.223	0.1675	0.2195	0.1745	0.215	0.998517	1892485	0.0618904	0.0282341	4.53168	44.5476	0.056057	0.031555	0.125427	0.034632	0.106294	0.038414	0.0898906	0.996032	65703	0.0767013	0.0467267	2.09536	8.94579	0.064347	0.0251699	0.210677	0.029435	0.172905	0.0352112	0.133992	0.996032	65703	0.230888
HC227	Mcc	HC227_Mcc_bin.79	54.129	57.0559	55.5539	84.7438	6487969	1	12076	0.265551	0.0228819	-1.07095	4.95336	0.269	0.2085	0.3005	0.2215	0.296	0.2355	0.2905	0.902207	7696926	0.12083	0.079586	2.30145	9.51751	0.095224	0.045121	0.359129	0.0505	0.292231	0.057464	0.21922	0.67526	149878	0.0518162	0.0382218	3.5059	21.1724	0.0420635	0.0160179	0.145617	0.0188168	0.114568	0.0224427	0.0883236	0.67526	149878	0.190699
HC227	Mcc	HC227_Mcc_bin.7	23.3459	0.745033	1.44398	328.341	344715	1	643	0.305461	0.0217184	-0.382062	3.77115	0.3065	0.264	0.344475	0.2705	0.33895	0.2775	0.3319	0.867316	23871	0.0529094	0.0280673	2.76842	15.8116	0.046848	0.0204658	0.11771	0.0244215	0.0978805	0.028547	0.082539	0.704069	528	0.0876368	0.040196	1.24601	5.39191	0.081414	0.0285675	0.19639	0.0384478	0.158797	0.0444144	0.137548	0.704069	528	0.287819
HC227	Mcc	HC227_Mcc_bin.80	100	94.9615	97.4156	0	4093309	1	8148	0.229972	0.0128823	-0.637439	4.35143	0.231	0.2015	0.252	0.208	0.249	0.214	0.245	0.999015	7918210	0.111091	0.0363236	1.70744	8.09161	0.103507	0.063981	0.205527	0.068832	0.179894	0.074953	0.155869	0.996199	306153	0.0967727	0.0412345	1.54791	7.75605	0.089876	0.0391834	0.197421	0.0453466	0.170612	0.053158	0.146725	0.996199	306153	0.298979
HC227	Mcc	HC227_Mcc_bin.81	57.1981	1.60642	3.12508	74.8308	243705	1	462	0.305073	0.0199323	-1.11954	5.75247	0.3075	0.249575	0.340238	0.2682	0.331475	0.283	0.32645	0.925123	15400	0.0425834	0.0270143	1.99917	6.93726	0.0340675	0.0148968	0.125484	0.0183389	0.107158	0.021393	0.0834404	0.784526	406	0.0798431	0.0349997	0.720104	3.94423	0.0755265	0.0233655	0.166798	0.0277277	0.13924	0.0364955	0.122721	0.784526	406	0.256958
HC227	Mcc	HC227_Mcc_bin.82	99.3192	89.2069	93.9918	0.685508	4362715	1	8535	0.188199	0.0159035	0.123958	3.60606	0.188	0.1565	0.22	0.162	0.21415	0.1685	0.208	0.989786	7218100	0.0500598	0.0232682	3.04527	23.4986	0.044774	0.023652	0.105808	0.026005	0.09095	0.029059	0.076616	0.95936	237016	0.0980758	0.0485813	1.43648	5.92456	0.086975	0.035202	0.224371	0.0411137	0.194819	0.048657	0.162828	0.95936	237016	0.244322
HC227	Mcc	HC227_Mcc_bin.83	97.6994	28.4601	44.0796	2.35473	4690982	1	7816	0.334953	0.0153384	-0.805252	5.25634	0.336	0.3005	0.362	0.309	0.3575	0.3165	0.353	0.547249	701520	0.0261271	0.0110437	1.71948	7.51466	0.023544	0.012457	0.056006	0.013776	0.048048	0.015446	0.0400391	0.185471	4095	0.0314715	0.0197087	2.12106	8.97672	0.026097	0.0100591	0.0901652	0.0116948	0.0714198	0.0139688	0.053875	0.185471	4095	0.114207
HC227	Mcc	HC227_Mcc_bin.84	100	8.47498	15.6257	0	335045	1	643	0.210554	0.0213863	0.00976652	2.98431	0.2105	0.16805	0.249475	0.17505	0.24485	0.1835	0.2385	0.968983	33153	0.0691743	0.0386138	1.94273	8.28605	0.057137	0.0288216	0.175482	0.0324272	0.148466	0.0362722	0.119681	0.910857	946	0.0988914	0.0462717	1.0835	4.27788	0.0883875	0.0334308	0.208686	0.0418582	0.192007	0.050165	0.167817	0.910857	946	0.174362
HC227	Mcc	HC227_Mcc_bin.85	100	77.9245	87.5928	0	6669623	1	12735	0.272809	0.0248477	-0.461307	3.94761	0.2745	0.216675	0.3165	0.2295	0.31	0.2415	0.302	0.955132	12090903	0.107476	0.0760847	2.66433	12.0372	0.082853	0.04041	0.340451	0.044872	0.264791	0.050661	0.193116	0.851577	320400	0.0473701	0.0309513	3.57914	23.7901	0.0401775	0.01648	0.129479	0.019115	0.0985511	0.022619	0.0760674	0.851577	320400	0.227623
HC227	Mcc	HC227_Mcc_bin.86	85.4876	2.33979	4.55491	16.976	261042	1	487	0.230269	0.0272253	0.471516	3.3628	0.2305	0.18415	0.29285	0.19065	0.27835	0.1978	0.2665	0.921664	13530	0.150263	0.0883882	1.78514	7.08079	0.124788	0.0471559	0.400473	0.0595459	0.329666	0.070805	0.263246	0.698918	276	0.122692	0.0654738	0.942367	3.59413	0.112966	0.0333226	0.283633	0.042469	0.251584	0.0521055	0.211605	0.698918	276	0.299867
HC227	Mcc	HC227_Mcc_bin.87	27.0204	21.2113	23.766	270.09	10437409	1	18379	0.32144	0.024279	-0.541049	3.05028	0.325	0.27	0.3605	0.2785	0.356	0.288	0.35	0.71566	12125350	0.0517595	0.0346192	2.77685	18.3217	0.043695	0.013856	0.139421	0.016414	0.114125	0.02031	0.090625	0.494829	241860	0.0900097	0.046285	1.00026	4.12446	0.080955	0.0259855	0.200605	0.031253	0.178364	0.038712	0.153843	0.494829	241860	0.270196
HC227	Mcc	HC227_Mcc_bin.88	100	92.338	96.0164	0	2022239	1	4029	0.231513	0.020949	-0.177511	6.8405	0.234	0.184	0.263	0.194	0.258	0.206	0.2525	1	1939465	0.089996	0.0579452	3.84964	23.2509	0.074514	0.041386	0.245859	0.045182	0.17887	0.050018	0.138978	1	74691	0.0538694	0.0309676	1.93036	8.19993	0.045881	0.0182022	0.141462	0.0213495	0.117158	0.025371	0.092473	1	74691	0.183762
HC227	Mcc	HC227_Mcc_bin.89	97.7032	51.8167	67.7188	2.35076	4495375	1	8603	0.337759	0.0163996	-1.17991	6.30129	0.3395	0.2985	0.364	0.3095	0.3605	0.3185	0.356	0.956576	5697000	0.0296043	0.020775	3.90763	27.0841	0.023781	0.011722	0.0811	0.012993	0.06503	0.014667	0.050275	0.852047	154846	0.0366295	0.0248104	2.10679	9.03162	0.02919	0.010834	0.107245	0.012671	0.0871858	0.015201	0.068221	0.852047	154846	0.155483
HC227	Mcc	HC227_Mcc_bin.8	100	90.6682	95.1058	0	5244740	1	10191	0.338417	0.0170651	-1.5453	7.94579	0.3405	0.295	0.364	0.309	0.3605	0.3195	0.3565	0.981089	9528795	0.0257154	0.0205512	4.11929	28.0421	0.01982	0.009849	0.082285	0.010896	0.061222	0.012269	0.04394	0.924155	293761	0.0351408	0.022415	2.72658	13.9984	0.029458	0.011787	0.097667	0.013705	0.074402	0.016278	0.058682	0.924155	293761	0.174719
HC227	Mcc	HC227_Mcc_bin.90	100	63.5961	77.7477	0	2245670	1	4471	0.186926	0.0132478	-0.275726	3.35456	0.1875	0.158	0.212	0.1635	0.208	0.17	0.2025	1	2375110	0.0457897	0.0210489	2.31411	10.9339	0.040232	0.022839	0.104343	0.024941	0.0867785	0.027557	0.07042	1	90951	0.0775511	0.0462566	1.94516	7.62262	0.064771	0.0265258	0.212122	0.0307605	0.177466	0.036592	0.137526	1	90951	0.244497
HC227	Mcc	HC227_Mcc_bin.91	100	76.189	86.4855	0	1919500	1	3792	0.265922	0.0188314	-1.14027	5.95068	0.268	0.218888	0.2965	0.23	0.292	0.244	0.2865	0.99779	1590436	0.136163	0.0555917	1.92067	9.46294	0.124461	0.066211	0.279999	0.073213	0.238619	0.082031	0.202402	0.994581	57291	0.111912	0.0508128	1.27331	5.69518	0.102496	0.0409055	0.237403	0.0480085	0.207143	0.057342	0.178331	0.994581	57291	0.265899
HC227	Mcc	HC227_Mcc_bin.92	100	82.147	90.1986	0	1808770	1	3537	0.193548	0.016555	0.112988	3.9048	0.1935	0.1595	0.2288	0.1665	0.22	0.1735	0.213	0.990308	1230096	0.0368622	0.0185516	2.46793	13.5288	0.031862	0.016952	0.0854526	0.018567	0.071523	0.020641	0.05866	0.972522	40186	0.0347599	0.0188802	1.88566	8.86891	0.030068	0.012155	0.0849925	0.01409	0.0718412	0.016749	0.058474	0.972522	40186	0.118238
HC227	Mcc	HC227_Mcc_bin.93	97.5351	91.1973	94.2597	2.52724	4722592	1	9320	0.211305	0.0174413	-0.527831	3.60508	0.213	0.1725	0.2415	0.1805	0.2375	0.1885	0.2325	0.99816	9446031	0.0729578	0.0345802	2.55997	13.5755	0.064523	0.034841	0.163702	0.038238	0.134075	0.042582	0.110989	0.978091	334971	0.082516	0.0467229	2.45081	12.1949	0.071672	0.0297653	0.211224	0.0346145	0.167342	0.04093	0.133138	0.978091	334971	0.213705
HC227	Mcc	HC227_Mcc_bin.94	98.1044	83.2588	90.074	1.93224	3453391	1	6617	0.341054	0.0233257	-1.28991	6.19045	0.3445	0.28	0.377	0.299	0.372	0.313	0.366	0.962755	3459765	0.0324635	0.040374	7.89193	92.0013	0.022496	0.010089	0.114339	0.011307	0.079175	0.012947	0.055848	0.877286	97461	0.0408772	0.0241785	1.7139	7.29074	0.034484	0.0125995	0.103636	0.014768	0.088113	0.017699	0.072774	0.877286	97020	0.129432
HC227	Mcc	HC227_Mcc_bin.95	97.4786	74.2957	84.3227	2.58662	4367384	1	8364	0.20425	0.0171042	-0.260632	2.94766	0.2055	0.169	0.235	0.1745	0.231	0.182	0.2255	0.945258	5576130	0.0851039	0.0329817	1.30919	5.52869	0.077966	0.040745	0.16841	0.045223	0.149419	0.050874	0.129424	0.841335	162165	0.155666	0.0698089	0.949537	4.03319	0.143344	0.0550202	0.323972	0.0644998	0.289563	0.077435	0.251816	0.841335	162165	0.25755
HC227	Mcc	HC227_Mcc_bin.96	100	51.1439	67.6758	0	2263812	1	4223	0.295129	0.0193958	-0.899564	4.88291	0.298	0.248775	0.326225	0.26	0.32245	0.271	0.317	0.914786	962578	0.0691029	0.0430046	3.30623	21.9692	0.05693	0.027903	0.174954	0.030994	0.146343	0.034985	0.118167	0.704244	19503	0.0571466	0.0264258	1.39575	5.68829	0.051495	0.021692	0.127633	0.0253791	0.110347	0.0299376	0.0918338	0.704244	19503	0.212952
HC227	Mcc	HC227_Mcc_bin.97	100	6.83812	12.8009	0	392445	1	777	0.315708	0.0223986	0.111998	3.40878	0.315	0.2742	0.3639	0.2809	0.3555	0.2895	0.3455	1	68265	0.0568219	0.0263716	2.02947	10.2487	0.050798	0.0245244	0.126489	0.0282632	0.10641	0.0323038	0.087887	1	2415	0.0783716	0.0349093	1.06697	4.36026	0.071532	0.0281804	0.16529	0.0338678	0.147997	0.0408678	0.125832	1	2415	0.25183
HC227	Mcc	HC227_Mcc_bin.98	100	27.271	42.8551	0	965123	1	1921	0.2814	0.0243209	-1.68478	6.92792	0.286	0.2035	0.314	0.233	0.31	0.2545	0.305	1	435711	0.133202	0.128091	2.38341	8.125	0.084858	0.0415517	0.557224	0.0463025	0.476362	0.05229	0.306202	1	16471	0.0580166	0.0375555	2.05254	8.63226	0.047794	0.0172433	0.164277	0.020385	0.133806	0.024731	0.10529	1	16471	0.245142
HC227	Mcc	HC227_Mcc_bin.99	100	82.0355	90.1313	0	3010897	1	5753	0.291508	0.020264	-1.05593	5.49256	0.294	0.242	0.324	0.2545	0.32	0.267	0.3145	0.965086	2507680	0.0587724	0.0348102	3.2773	20.6186	0.049453	0.025101	0.148075	0.027747	0.119863	0.031167	0.095137	0.867583	67161	0.0696697	0.0320053	1.46076	6.70286	0.063508	0.026216	0.149727	0.030546	0.129348	0.036167	0.109822	0.867583	67161	0.205798
HC227	Mcc	HC227_Mcc_bin.9	83.1734	84.5853	83.8734	20.2308	4028160	1	7906	0.263014	0.0242181	-0.778335	4.25511	0.2655	0.205813	0.3035	0.2185	0.2975	0.2315	0.291	0.994225	6417153	0.111549	0.0680163	2.55763	12.3098	0.09212	0.043906	0.306046	0.048989	0.242314	0.055654	0.188137	0.979932	216811	0.0474835	0.0266853	2.35306	12.1666	0.041627	0.016406	0.120063	0.019178	0.0951305	0.022798	0.076646	0.979932	216811	0.177816
HC227	Xcc	HC227_Xcc_bin.001	15.9949	0.872634	1.65498	525.199	248898	1	220	0.251662	0.0504611	-0.330355	2.11294	0.261	0.155688	0.335313	0.1663	0.3245	0.1779	0.3116	0.509651	253	0.292711	0.197448	0.293593	1.96551	0.255919	0	0.653034	0	0.633833	0.0394892	0.582856	0.420566	45	0.183462	0.131064	0.0522566	2.14422	0.203532	0	0.385568	0	0.359202	0	0.346738	0.420566	45	0.297569
HC227	Xcc	HC227_Xcc_bin.002	15.3208	1.40845	2.57974	552.709	695253	1	555	0.317516	0.0380582	-2.50996	9.09694	0.328	0.18985	0.3515	0.20985	0.34815	0.2905	0.345	0.130924	120	0.184705	0.283766	1.36176	2.90377	0.0498025	0	0.756767	0	0.750733	0	0.71535	0.0644557	10	0.127696	0.165845	0.7897	1.73464	0.055693	0	0.368635	0	0.368033	0	0.36683	0.0644557	10	0.180112
HC227	Xcc	HC227_Xcc_bin.003	93.8906	91.5357	92.6982	6.50694	4554288	1	4486	0.280163	0.0252896	-0.901339	4.85665	0.283	0.222	0.321	0.235	0.315375	0.247	0.309	0.978762	351541	0.108365	0.0870277	2.70446	11.851	0.079437	0.0348445	0.394717	0.039446	0.28281	0.045409	0.202397	0.957697	76636	0.0501906	0.050837	3.98317	21.952	0.036444	0.0138886	0.190718	0.0165407	0.137712	0.019833	0.085289	0.957697	76636	0.201229
HC227	Xcc	HC227_Xcc_bin.004	96.7189	95.6356	96.1742	3.39245	2737983	1	2672	0.312723	0.0271179	-3.17034	17.5619	0.316	0.217713	0.347	0.282	0.342	0.2935	0.3355	0.966048	113526	0.0701267	0.136339	4.20223	19.2737	0.0355335	0.017771	0.687764	0.0197862	0.182554	0.02229	0.078162	0.900472	21736	0.0580441	0.0619825	3.31661	14.2983	0.040053	0.015581	0.297123	0.0187168	0.215995	0.022363	0.095582	0.900472	21736	0.175758
HC227	Xcc	HC227_Xcc_bin.005	91.3674	90.3008	90.831	9.4482	4508910	1	4443	0.285293	0.0286349	-1.22082	6.11323	0.2895	0.209025	0.331475	0.2325	0.323	0.2525	0.3145	0.969422	354061	0.0909229	0.106238	3.1323	13.1834	0.055107	0.0236215	0.483254	0.026608	0.342182	0.030361	0.181895	0.958614	80601	0.0418125	0.0358509	4.76349	37.0652	0.032665	0.012595	0.126076	0.015006	0.097952	0.017989	0.072528	0.958614	80601	0.179684
HC227	Xcc	HC227_Xcc_bin.006	91.4881	48.418	63.3235	9.30383	1559793	1	1527	0.309119	0.0172574	-1.58984	9.91068	0.3115	0.268075	0.335	0.281	0.33135	0.2905	0.3267	0.937077	39060	0.0550914	0.038977	4.11262	26.7208	0.044934	0.0228169	0.146201	0.025507	0.113783	0.0288119	0.0897254	0.92326	8778	0.0519258	0.0512958	3.42209	16.3805	0.0377185	0.0125466	0.243969	0.0160486	0.145751	0.0195815	0.0868807	0.92326	8778	0.249222
HC227	Xcc	HC227_Xcc_bin.007	80.5905	95.3496	87.351	24.0841	2861567	1	2792	0.256203	0.0254731	-0.0369968	6.43261	0.2585	0.1975	0.299	0.211775	0.2895	0.22705	0.2815	0.923036	129795	0.192024	0.0959159	1.37477	5.26012	0.164892	0.0806957	0.44394	0.0888587	0.388136	0.0991178	0.323528	0.887043	28680	0.127989	0.110731	1.76693	5.45714	0.085129	0.0292398	0.427204	0.0357879	0.382393	0.043756	0.32023	0.887043	28680	0.253271
HC227	Xcc	HC227_Xcc_bin.008	23.9229	9.8768	13.9813	318.01	3129001	1	2618	0.337056	0.0240665	-4.6744	36.1332	0.34	0.301712	0.365	0.311925	0.3605	0.3195	0.3565	0.276679	9453	0.0593756	0.157193	3.77266	15.4656	0.017264	0.006961	0.707649	0.0082742	0.654412	0.0097934	0.043699	0.0831256	253	0.0768158	0.120805	2.90421	9.95161	0.04209	0	0.487946	0	0.458775	0.0139588	0.0906404	0.0831256	253	0.165036
HC227	Xcc	HC227_Xcc_bin.009	69.9725	89.9369	78.7084	42.9133	5303185	1	5242	0.301608	0.0177212	-0.868329	7.01977	0.3025	0.2645	0.3335	0.2735	0.328	0.281	0.322	0.966969	498501	0.0746343	0.0460077	3.3233	24.4777	0.064451	0.027195	0.181531	0.030425	0.145988	0.034658	0.121238	0.944009	114003	0.0980279	0.0756866	0.755651	2.31985	0.058882	0.0179261	0.254641	0.021236	0.2341	0.0255522	0.210452	0.944009	114003	0.29567
HC227	Xcc	HC227_Xcc_bin.010	32.4587	16.3261	21.7249	208.083	1623261	1	1499	0.226911	0.0215938	0.879124	11.1207	0.227	0.18295	0.2635	0.194	0.2575	0.2035	0.2495	0.757616	21115	0.152019	0.102967	2.35781	10.0849	0.114922	0.061443	0.435827	0.0684602	0.346495	0.0758848	0.287741	0.542079	2701	0.113402	0.136052	1.7443	4.75527	0.052117	0	0.489486	0.019897	0.425778	0.026762	0.362394	0.542079	2701	0.289134
HC227	Xcc	HC227_Xcc_bin.011	98.7093	82.9638	90.1542	1.30762	5634055	1	5552	0.365544	0.0222568	-3.40675	32.1677	0.3675	0.328	0.398	0.3345	0.3935	0.343	0.3885	0.988001	540280	0.0220902	0.048711	14.3343	221.286	0.015384	0.006976	0.055521	0.00784695	0.044089	0.008985	0.03428	0.963425	117855	0.0326703	0.0289212	7.24797	81.0164	0.026932	0.00933735	0.085835	0.011239	0.06644	0.0137014	0.0534156	0.963425	114011	0.128345
HC227	Xcc	HC227_Xcc_bin.012	100	95.9418	97.9289	0	2060179	1	2052	0.226182	0.0190956	-0.800666	4.27801	0.2285	0.179638	0.258	0.1915	0.253225	0.2025	0.248	0.999146	81810	0.0737452	0.0441809	2.26807	9.65269	0.0598625	0.0313777	0.205163	0.0344843	0.165525	0.038347	0.12697	0.999146	19900	0.0364384	0.0357251	3.78852	20.3958	0.0268585	0.00942195	0.170253	0.0114199	0.0841101	0.0140638	0.0605216	0.999146	19900	0.147208
HC227	Xcc	HC227_Xcc_bin.013	19.8516	15.8558	17.6301	403.738	2986601	1	2804	0.228186	0.0211071	-0.216718	3.72098	0.229	0.1825	0.2675	0.1905	0.261	0.201	0.2535	0.821385	83845	0.165083	0.0914731	1.52938	5.53257	0.133507	0.0675941	0.40285	0.0751668	0.355305	0.083951	0.301057	0.589928	10011	0.135953	0.130194	1.43227	4.1661	0.075468	0.0204672	0.479592	0.02599	0.412868	0.032357	0.344689	0.589928	10011	0.314333
HC227	Xcc	HC227_Xcc_bin.014	93.9269	84.6474	89.046	6.46582	5357871	1	5302	0.287725	0.0278287	-1.21536	5.78948	0.292	0.219262	0.3315	0.2365	0.3245	0.25355	0.318	0.987743	516636	0.0976606	0.100947	3.1411	14.0941	0.063904	0.026819	0.446159	0.03037	0.314568	0.0350035	0.186916	0.975924	118341	0.0491338	0.0509414	3.93825	21.5092	0.034771	0.01338	0.219483	0.015834	0.131324	0.018865	0.083026	0.975924	118341	0.165591
HC227	Xcc	HC227_Xcc_bin.015	13.4724	11.0808	12.1601	642.26	5454288	0.999817	4612	0.343577	0.0149224	-0.577719	4.46903	0.3445	0.3125	0.3705	0.3195	0.3665	0.325	0.3615	0.326981	39621	0.0163047	0.00710186	1.23119	5.32042	0.014819	0.00698	0.03466	0.007929	0.030278	0.009087	0.02573	0.108674	1081	0.0388093	0.01842	0.648675	4.36087	0.036839	0	0.080755	0.013303	0.072104	0.019599	0.06256	0.108674	1081	0.146118
HC227	Xcc	HC227_Xcc_bin.016	76.251	96.8047	85.3073	31.1458	5749532	1	5700	0.28619	0.0200787	-1.16526	7.17853	0.2885	0.238737	0.322	0.251	0.314	0.26395	0.307	0.975429	601156	0.121953	0.085833	2.643	11.8716	0.096013	0.046117	0.383212	0.05075	0.2981	0.05678	0.219167	0.962709	141246	0.0904009	0.062922	1.19481	4.24924	0.066435	0.0210781	0.24062	0.0251515	0.211409	0.030458	0.181631	0.962709	141246	0.269484
HC227	Xcc	HC227_Xcc_bin.017	94.0071	89.7225	91.8148	6.37498	3478765	1	3439	0.344094	0.017635	-0.687674	5.5992	0.345	0.3075	0.3765	0.3155	0.3705	0.323	0.3655	0.990356	217470	0.0246151	0.0150471	2.70082	14.3774	0.020171	0.009928	0.0644029	0.011067	0.0526715	0.012499	0.042245	0.981327	49455	0.0501428	0.0333456	1.86339	7.34542	0.040097	0.0142637	0.143613	0.01727	0.121013	0.020901	0.0946972	0.981327	49455	0.156918
HC227	Xcc	HC227_Xcc_bin.018	96.3837	90.8769	93.5493	3.75199	4046703	1	3986	0.355856	0.0162642	-0.716664	6.09189	0.3565	0.3225	0.3845	0.329	0.3805	0.3365	0.3755	0.986545	284635	0.0215957	0.0124714	1.99807	8.49533	0.017727	0.0086	0.0554262	0.009595	0.047687	0.010851	0.038553	0.965047	62481	0.0476485	0.0330678	2.11785	8.04613	0.037835	0.014512	0.149511	0.017256	0.126832	0.020691	0.089263	0.965047	62481	0.133223
HC227	Xcc	HC227_Xcc_bin.019	69.1599	49.1684	57.4753	44.5925	3440770	1	3385	0.308762	0.0153751	-0.238472	4.4331	0.3095	0.276	0.34	0.283	0.3325	0.29	0.3265	0.949603	195000	0.0576186	0.0320791	2.65369	17.1725	0.049143	0.023019	0.128266	0.02561	0.113071	0.0289789	0.096784	0.918888	44253	0.0803438	0.0612579	1.40745	5.10693	0.057416	0.0165546	0.236064	0.0199362	0.207575	0.0244894	0.171356	0.918888	44253	0.234638
HC227	Xcc	HC227_Xcc_bin.020	98.9111	88.2943	93.3016	1.10089	3383778	1	3340	0.321696	0.0230897	-1.38748	7.78397	0.3245	0.267	0.3575	0.2815	0.352525	0.2945	0.347	0.98766	199396	0.0422255	0.0458085	4.35286	27.2817	0.0286975	0.012395	0.171974	0.013988	0.115502	0.016091	0.074764	0.970601	43660	0.0499166	0.0289816	1.71814	7.34793	0.0425395	0.0154819	0.128703	0.018601	0.10864	0.0225359	0.087561	0.970601	43660	0.143725
HC227	Xcc	HC227_Xcc_bin.021	96.8106	99.6013	98.1861	3.29451	1668605	1	1659	0.270175	0.0186253	-0.841775	3.87352	0.273	0.2255	0.2995	0.232	0.296	0.245	0.291	0.977038	52650	0.134062	0.0763677	1.6938	6.39286	0.110045	0.0536298	0.341975	0.0594054	0.2935	0.066712	0.241575	0.967073	12880	0.0905873	0.0454133	1.10312	4.73571	0.0814865	0.0285077	0.205067	0.035552	0.178903	0.0431886	0.152118	0.967073	12880	0.211556
HC227	Xcc	HC227_Xcc_bin.022	98.0963	89.3011	93.4923	1.94062	5224519	1	5191	0.323106	0.0204409	-1.2629	8.05307	0.325	0.277	0.357	0.289	0.352	0.299	0.346	0.994735	511566	0.0488493	0.0482517	7.30297	71.0059	0.039056	0.017122	0.119308	0.019169	0.0960027	0.022004	0.076672	0.990551	120295	0.0677666	0.0429311	1.90571	7.97062	0.055949	0.020035	0.191584	0.0239334	0.157674	0.0289686	0.122304	0.990551	120295	0.213196
HC227	Xcc	HC227_Xcc_bin.023	55.4234	13.543	21.7671	80.4291	913704	1	868	0.240862	0.0170977	-0.39535	3.61327	0.242	0.203338	0.270518	0.210645	0.267	0.21985	0.261	0.917299	9453	0.125633	0.0544175	1.50352	6.42237	0.112082	0.0630714	0.278759	0.0705372	0.248102	0.0778186	0.192328	0.650617	1128	0.0598026	0.0555964	3.6828	17.6529	0.0495255	0	0.298341	0.0170953	0.105422	0.0256358	0.0822401	0.650617	1128	0.252492
HC227	Xcc	HC227_Xcc_bin.024	96.4397	48.5273	64.5658	3.69172	2435310	1	2411	0.307779	0.0152058	-0.892735	4.91802	0.3095	0.272	0.333	0.2805	0.329	0.2895	0.325	0.978454	107416	0.047371	0.0261613	2.03754	7.99391	0.039188	0.021095	0.124804	0.0232135	0.105985	0.025826	0.0807795	0.970655	24753	0.0542717	0.0369706	2.17289	9.78955	0.043275	0.0157266	0.154016	0.0190046	0.128422	0.023025	0.100979	0.970655	24753	0.200343
HC227	Xcc	HC227_Xcc_bin.025	94.9395	77.2245	85.1706	5.33019	2856479	1	2835	0.303104	0.0153922	-1.40429	7.7225	0.305	0.2655	0.327075	0.276	0.324	0.285	0.319	0.988211	153735	0.0563193	0.0317147	3.63862	22.4502	0.0486	0.0280543	0.151113	0.030526	0.114664	0.033582	0.0814652	0.98251	36585	0.0733027	0.0394856	1.94274	8.83776	0.064143	0.0256814	0.183939	0.0307806	0.149045	0.0366816	0.119695	0.98251	36585	0.212792
HC227	Xcc	HC227_Xcc_bin.026	75.6525	92.4197	83.1997	32.1834	4967319	0.999799	4780	0.335098	0.0162955	-0.689128	4.97257	0.336	0.2975	0.3635	0.307475	0.3595	0.3155	0.354	0.864033	336610	0.0288844	0.0170426	2.02199	9.248	0.023728	0.010829	0.0725985	0.01208	0.060934	0.013697	0.050293	0.825873	73920	0.061685	0.0438097	1.87401	7.52026	0.046921	0.016741	0.177372	0.020065	0.151686	0.024162	0.124666	0.825873	73920	0.192226
HC227	Xcc	HC227_Xcc_bin.027	95.5528	94.5448	95.0461	4.65418	2621918	1	2590	0.337705	0.0147223	-0.351806	4.00747	0.338	0.308	0.3655	0.3135	0.3605	0.319	0.356	0.979384	120786	0.0317868	0.0192465	5.15905	45.8986	0.027749	0.013945	0.0672802	0.0155303	0.0572245	0.017534	0.0483275	0.953195	26335	0.0501419	0.0253979	1.46134	6.8579	0.044953	0.0165342	0.114214	0.0202555	0.0979679	0.0243498	0.0824598	0.953195	26335	0.15172
HC227	Xcc	HC227_Xcc_bin.028	95.541	99.405	97.4347	4.66714	1833965	1	1819	0.140004	0.0165822	-0.0268841	3.25683	0.1395	0.107225	0.171275	0.11245	0.1675	0.1195	0.1615	0.985958	62128	0.0191504	0.0133307	4.26109	34.7875	0.0155935	0.00684217	0.0481825	0.007821	0.0405877	0.00903	0.0332393	0.962685	14535	0.0880786	0.0572779	2.90303	17.0198	0.075157	0.023995	0.215976	0.0311672	0.180313	0.0389616	0.147656	0.962685	14535	0.187771
HC227	Xcc	HC227_Xcc_bin.029	49.0971	4.45119	8.16237	103.678	329154	1	308	0.229055	0.0164422	-0.283455	3.61885	0.2305	0.194013	0.259	0.19985	0.2535	0.207	0.24865	0.859054	1176	0.107715	0.0406065	0.510077	7.07457	0.103207	0	0.194615	0.060395	0.176124	0.072584	0.153205	0.692165	153	0.0469346	0.0243232	-0.0240637	3.34156	0.047205	0	0.0988348	0	0.090374	0	0.0735378	0.692165	153	0.240811
HC227	Xcc	HC227_Xcc_bin.030	86.6257	75.3686	80.606	15.4392	2182284	1	2150	0.254869	0.0243785	-0.760385	4.28731	0.25775	0.195862	0.296637	0.208725	0.2895	0.2235	0.282	0.964417	81810	0.203511	0.0938775	1.06576	4.30045	0.181004	0.0818159	0.430046	0.092712	0.383804	0.105862	0.33495	0.92797	17955	0.153759	0.0934762	1.70272	6.3977	0.130286	0.0443685	0.432781	0.0558274	0.365998	0.0682832	0.268969	0.92797	17955	0.279178
HC227	Xcc	HC227_Xcc_bin.031	96.236	99.3926	97.7888	3.91124	3321475	1	3298	0.27382	0.0232815	-1.37087	6.76026	0.2775	0.219	0.307787	0.2315	0.304	0.2455	0.2985	0.990917	207046	0.116688	0.0935645	2.66636	11.4922	0.0839925	0.040034	0.410678	0.0446742	0.312532	0.0506205	0.221371	0.978993	49770	0.0508246	0.0374368	3.36983	21.4008	0.0406365	0.0153822	0.145282	0.0183104	0.119665	0.0220428	0.0921572	0.978993	49770	0.23044
HC227	Xcc	HC227_Xcc_bin.032	62.6131	7.42741	13.2796	59.7111	443564	1	411	0.23881	0.015599	-0.300928	3.53115	0.2385	0.20475	0.268	0.2135	0.26275	0.22	0.258	0.819282	1653	0.11924	0.0519089	1.09167	6.67706	0.108516	0	0.245489	0.064023	0.212862	0.0747302	0.184258	0.439984	153	0.0464319	0.0352595	1.48428	5.68209	0.039246	0	0.153552	0	0.128059	0	0.0876212	0.439984	153	0.23982
HC227	Xcc	HC227_Xcc_bin.033	88.3386	91.7661	90.0197	13.2008	2918013	1	2874	0.188701	0.0158639	-0.264849	3.48462	0.189	0.154	0.217587	0.161	0.213	0.1685	0.208	0.953485	146070	0.0585238	0.0291123	1.93298	9.03998	0.0504	0.0259904	0.133333	0.0287475	0.114791	0.0321339	0.0959691	0.928149	33153	0.203257	0.0950735	1.03538	4.30564	0.184188	0.071257	0.444858	0.085716	0.393594	0.102672	0.334133	0.928149	33153	0.244899
HC227	Xcc	HC227_Xcc_bin.034	96.4342	96.9601	96.6964	3.69762	2985556	1	2964	0.213451	0.0169583	-0.60623	3.56471	0.215	0.174	0.2415	0.182	0.238	0.192	0.234	0.981676	166753	0.0798195	0.033643	1.64998	6.60684	0.070626	0.040993	0.172656	0.044551	0.150154	0.048952	0.12495	0.970321	40186	0.0450466	0.0276953	2.83939	16.227	0.0385295	0.0152537	0.115538	0.0181977	0.0915818	0.021691	0.073926	0.970321	40186	0.187047
HC227	Xcc	HC227_Xcc_bin.035	95.732	93.1086	94.402	4.45831	2130024	1	2122	0.231354	0.021537	-0.255392	6.61824	0.234	0.182021	0.264	0.193	0.2585	0.20405	0.2535	0.986719	86736	0.0971079	0.0646594	2.99341	15.2729	0.077152	0.0417498	0.284812	0.045943	0.226098	0.0510595	0.166041	0.979758	21115	0.063616	0.0563776	2.98175	12.9818	0.047532	0.0168951	0.262514	0.0207107	0.189751	0.025244	0.108621	0.979758	21115	0.19084
HC227	Xcc	HC227_Xcc_bin.036	53.4175	51.2838	52.3289	87.2045	3175423	1	3136	0.296472	0.0181557	-0.532276	5.71152	0.297	0.258	0.332	0.2665	0.3245	0.2755	0.3175	0.967976	177906	0.0881521	0.0487233	2.21954	12.2727	0.0778495	0.032639	0.209322	0.0363812	0.171874	0.04149	0.144679	0.950145	41616	0.143766	0.0851979	0.844542	3.88011	0.135108	0.0296094	0.330375	0.0365897	0.292097	0.0463205	0.253833	0.950145	41616	0.303246
HC227	Xcc	HC227_Xcc_bin.037	76.604	91.7414	83.4921	30.5414	3676043	1	3640	0.278584	0.0199146	-0.352048	4.88467	0.2795	0.236	0.318	0.246	0.3105	0.25545	0.3015	0.981136	243951	0.154234	0.0832767	1.50934	6.11456	0.133803	0.0555368	0.372289	0.0630795	0.314316	0.072724	0.262886	0.950612	55945	0.159376	0.107836	0.881097	2.94676	0.11822	0.0337174	0.401521	0.0413108	0.360148	0.0510992	0.317711	0.950612	55945	0.259355
HC227	Xcc	HC227_Xcc_bin.038	99.5574	90.6272	94.8826	0.444598	3440572	1	3425	0.227412	0.0161085	-0.614884	4.88464	0.228	0.191	0.2565	0.201	0.252	0.208	0.2465	0.995972	224785	0.100988	0.0422897	2.19045	11.118	0.09065	0.052923	0.213826	0.0574222	0.180748	0.063057	0.150758	0.991098	54285	0.0814306	0.0437071	2.52918	13.8115	0.07261	0.029645	0.19016	0.0352468	0.152589	0.0418332	0.12664	0.991098	54285	0.253257
HC227	Xcc	HC227_Xcc_bin.039	77.0265	96.6894	85.7451	29.8255	6897902	1	6762	0.313728	0.0168157	-0.954541	6.03194	0.3155	0.274012	0.342	0.284	0.3375	0.2935	0.3325	0.946123	789396	0.0442976	0.038551	8.68832	110.025	0.036311	0.018203	0.114862	0.020143	0.085954	0.022639	0.067885	0.909799	177310	0.0895659	0.0489312	1.53668	6.69834	0.078578	0.0279854	0.213629	0.0333929	0.182956	0.040395	0.152894	0.909799	177310	0.248748
HC227	Xcc	HC227_Xcc_bin.040	99.5935	87.4763	93.1425	0.408151	4103400	1	4089	0.250373	0.017337	-0.952308	5.53908	0.252	0.2115	0.2795	0.2205	0.2755	0.2295	0.27	0.997502	325221	0.087438	0.0551649	2.96462	14.9294	0.071835	0.0370785	0.254169	0.040815	0.186416	0.0456	0.14191	0.99177	77028	0.0312276	0.0289271	4.60557	29.6106	0.024449	0.00897467	0.100832	0.010705	0.0653628	0.012937	0.0504153	0.99177	77028	0.220513
HC227	Xcc	HC227_Xcc_bin.041	88.5083	35.9839	51.1658	12.9838	1789191	1	1764	0.190677	0.0180302	-0.283942	3.92229	0.192	0.153	0.226	0.16	0.218	0.16865	0.2115	0.973329	55945	0.066614	0.0402564	2.12817	8.63631	0.054678	0.0262066	0.19118	0.0294092	0.151155	0.0332824	0.115261	0.948997	12561	0.195973	0.0940924	0.84928	3.65427	0.176955	0.062802	0.419693	0.078619	0.3814	0.095419	0.331565	0.948997	12561	0.219468
HC227	Xcc	HC227_Xcc_bin.042	91.4142	55.6245	69.1636	9.39225	2612916	1	2599	0.231501	0.0133192	-0.699257	5.15867	0.2325	0.2005	0.254525	0.20945	0.2505	0.216	0.247	0.9895	129795	0.122009	0.0539994	2.1139	8.84718	0.107741	0.06438	0.289023	0.0697497	0.237498	0.0763468	0.183138	0.979855	31375	0.121175	0.0993823	2.99131	12.5184	0.095153	0.0372261	0.49976	0.0450118	0.348553	0.053754	0.188885	0.979855	31375	0.301461
HC227	Xcc	HC227_Xcc_bin.043	93.9687	46.1163	61.8694	6.41841	1623216	1	1609	0.294736	0.016521	-0.739594	6.65517	0.2955	0.2602	0.325	0.2675	0.32	0.276	0.3135	0.985326	49141	0.065975	0.0382988	3.14628	17.0745	0.055713	0.0304695	0.181843	0.033784	0.129257	0.037554	0.102452	0.960278	11476	0.0805479	0.0477256	1.68172	7.00115	0.067552	0.0240174	0.209095	0.0298635	0.174242	0.0367815	0.143995	0.960278	11476	0.254072
HC227	Xcc	HC227_Xcc_bin.044	52.7424	41.5842	46.5033	89.6009	3390581	1	3269	0.225774	0.0161803	-0.403836	3.63912	0.227	0.1905	0.2555	0.1975	0.2495	0.205	0.2445	0.888702	156520	0.145257	0.0562964	0.879068	4.11424	0.137134	0.0664649	0.279112	0.0733069	0.250247	0.0821108	0.220017	0.776879	29161	0.136417	0.0704395	0.701188	3.06695	0.122627	0.03783	0.295185	0.046613	0.266648	0.057584	0.235338	0.776879	29161	0.344897
HC227	Xcc	HC227_Xcc_bin.045	85.3592	62.8945	72.4249	17.1519	1478925	0.999324	1457	0.296081	0.0175435	-1.09142	5.4417	0.2985	0.256	0.3228	0.264	0.3195	0.274	0.3155	0.963336	37675	0.0828889	0.0587859	3.00384	17.1074	0.064978	0.0300986	0.236063	0.0334681	0.191649	0.0378274	0.146254	0.922409	8646	0.068615	0.0405821	1.67749	7.1471	0.059014	0.0187546	0.181393	0.0246518	0.148123	0.030436	0.118855	0.922409	8646	0.257065
HC227	Xcc	HC227_Xcc_bin.046	97.6854	92.0508	94.7844	2.36945	2579705	0.999612	2559	0.208674	0.0172142	-0.309164	3.9282	0.209	0.172475	0.24	0.18	0.2355	0.187	0.23	0.997165	122760	0.0683757	0.0329578	1.75636	7.38838	0.059154	0.031121	0.157485	0.0343009	0.135075	0.038317	0.112136	0.981637	28680	0.110685	0.0565629	1.52697	6.62606	0.098471	0.0379788	0.260804	0.0456529	0.221073	0.0548198	0.182228	0.981637	28680	0.173288
HC227	Xcc	HC227_Xcc_bin.047	98.6415	88.2	93.129	1.37719	2748001	1	2721	0.332322	0.0156095	-0.372146	5.00184	0.3325	0.302	0.361	0.3075	0.3565	0.313	0.3515	0.993186	135981	0.0251885	0.01481	2.89541	14.3407	0.021316	0.011031	0.07109	0.012245	0.05201	0.013755	0.039367	0.982939	31878	0.0344446	0.0250103	2.1884	8.45313	0.026836	0.00994548	0.112299	0.0119875	0.0919109	0.0144391	0.0654268	0.982939	31878	0.145089
HC227	Xcc	HC227_Xcc_bin.048	96.763	56.8931	71.6554	3.3453	2587511	1	2568	0.190353	0.0179637	-0.534211	3.48973	0.192	0.15	0.221	0.156	0.2165	0.16685	0.2115	0.99196	125250	0.0552039	0.023855	1.512	6.44085	0.04928	0.0259662	0.117478	0.0287099	0.102273	0.0321559	0.0870271	0.98893	30135	0.164132	0.0706109	0.847406	4.06024	0.152953	0.0596359	0.3352	0.0716786	0.298844	0.0861344	0.258769	0.98893	30135	0.19652
HC227	Xcc	HC227_Xcc_bin.049	98.1709	98.0065	98.0887	1.86316	4421182	1	4407	0.304061	0.024392	-0.805471	5.44287	0.3055	0.2505	0.3455	0.2625	0.3405	0.2738	0.333	0.998294	378885	0.0708633	0.058806	3.75579	25.806	0.053244	0.02211	0.233136	0.025137	0.176293	0.029168	0.129962	0.998294	92665	0.0505214	0.0381945	2.11566	8.48397	0.038425	0.012967	0.162581	0.015701	0.135132	0.019159	0.101185	0.998294	92665	0.249715
HC227	Xcc	HC227_Xcc_bin.050	71.5007	95.0327	81.6041	39.8588	3198865	1	3115	0.368702	0.0171796	-0.830339	6.42376	0.37	0.333	0.3985	0.341	0.394	0.347	0.389	0.974713	152076	0.0257785	0.014501	0.881644	3.67163	0.0225995	0.007767	0.0583683	0.008843	0.0519172	0.010259	0.0452765	0.887346	27730	0.101616	0.0690719	0.506583	2.01541	0.078933	0.0142268	0.237641	0.0188314	0.221595	0.0254129	0.201843	0.887346	19738	0.156182
HC227	Xcc	HC227_Xcc_bin.051	42.141	31.1902	35.848	137.299	5007764	0.9998	4446	0.341758	0.016447	-0.723848	4.53832	0.343	0.304	0.369	0.313	0.365875	0.3215	0.361	0.544728	100576	0.0200749	0.0113195	2.46147	12.8159	0.017285	0.00779937	0.0502669	0.008866	0.0409093	0.010202	0.032788	0.341803	9453	0.0426341	0.020415	1.0934	5.47491	0.038874	0.0131389	0.090707	0.0171282	0.0806498	0.021354	0.0694132	0.341803	9453	0.173713
HC227	Xcc	HC227_Xcc_bin.052	55.9909	40.9558	47.3075	78.6004	1654711	1	1628	0.17933	0.0153986	0.0480106	4.20991	0.1795	0.1475	0.209	0.1535	0.2025	0.16	0.198	0.975509	46665	0.0448217	0.0337331	5.76851	48.7094	0.037248	0.019692	0.11057	0.0219852	0.0911946	0.0247378	0.0689984	0.944659	10011	0.16248	0.074781	1.50903	7.64134	0.15036	0.0585725	0.346609	0.0721995	0.293812	0.087947	0.249357	0.944659	10011	0.248544
HC227	Xcc	HC227_Xcc_bin.053	99.7587	99.344	99.5509	0.241886	1819291	1	1815	0.18791	0.0222031	0.131313	3.49551	0.1875	0.144175	0.2325	0.15	0.2235	0.1595	0.2145	0.997587	64620	0.0414106	0.02844	2.7608	14.4833	0.0327105	0.015087	0.12185	0.0169629	0.0947163	0.019262	0.0732486	0.994277	15576	0.0482976	0.0402283	2.4972	10.4142	0.0354985	0.012123	0.169915	0.014997	0.136282	0.0183985	0.0968055	0.994277	15576	0.126178
HC227	Xcc	HC227_Xcc_bin.054	83.3021	86.2476	84.7492	20.045	3400688	1	3359	0.273063	0.0250635	-0.77367	4.30973	0.276	0.212764	0.3165	0.228	0.309	0.241	0.3005	0.969799	202566	0.177343	0.102807	1.47901	5.73994	0.153617	0.0551862	0.460428	0.0635827	0.385553	0.0750295	0.310101	0.936524	46056	0.119093	0.0924275	1.50092	5.13155	0.0873165	0.0232291	0.36605	0.0287883	0.317108	0.035941	0.257868	0.936524	46056	0.275082
HC227	Xcc	HC227_Xcc_bin.055	66.714	64.958	65.8243	49.8936	2599792	1	2579	0.174448	0.0141315	-0.3055	3.86133	0.175	0.144725	0.2	0.15	0.1955	0.1565	0.1915	0.992274	123753	0.0349759	0.0129621	1.74687	9.37846	0.032504	0.0182636	0.0678474	0.020054	0.0588804	0.022251	0.0505478	0.97806	28920	0.138171	0.0603394	0.833141	4.25511	0.129224	0.0481494	0.278375	0.058847	0.249501	0.0707709	0.219336	0.97806	28920	0.232909
HC227	Xcc	HC227_Xcc_bin.056	65.3249	40.7124	50.1622	53.0811	1705674	1	1667	0.17309	0.0171866	-0.277195	3.04754	0.174	0.137825	0.2035	0.1435	0.1995	0.1498	0.194	0.965063	46971	0.0492249	0.0230964	1.29333	5.87679	0.044912	0.0193903	0.105187	0.0219615	0.091742	0.025257	0.078718	0.903988	9591	0.194269	0.131215	0.603508	2.28867	0.155581	0.0312145	0.469605	0.041326	0.434549	0.053006	0.386625	0.903988	9591	0.260069
HC227	Xcc	HC227_Xcc_bin.057	87.5785	71.229	78.5622	14.1832	2878326	1	2867	0.296182	0.0253999	-1.76479	8.17673	0.3005	0.220325	0.3325	0.25065	0.326	0.2693	0.3205	0.999526	160461	0.10405	0.116045	3.15394	12.8696	0.067028	0.0299045	0.544594	0.033527	0.406765	0.03822	0.187519	0.996794	38503	0.0647236	0.0544705	1.83648	6.984	0.043274	0.0131934	0.212899	0.0161183	0.175536	0.0199068	0.141461	0.996794	38503	0.216045
HC227	Xcc	HC227_Xcc_bin.058	60.7447	77.2276	68.0016	64.6233	2740002	1	2708	0.194939	0.0161024	-0.00725005	3.93457	0.1945	0.1615	0.227162	0.1685	0.221	0.1755	0.214	0.990234	134421	0.0671317	0.0395794	0.366038	1.96133	0.060063	0.017111	0.139693	0.019144	0.130422	0.022127	0.120094	0.969364	29890	0.114447	0.0899481	0.296802	1.52083	0.072198	0.0129837	0.268808	0.01593	0.250212	0.0196395	0.231101	0.969364	29890	0.227967
HC227	Xcc	HC227_Xcc_bin.059	80.6607	97.0729	88.109	23.9761	4669326	1	4637	0.329795	0.0166103	-1.13477	6.59992	0.3315	0.28995	0.3565	0.301	0.3525	0.3105	0.348	0.98871	408156	0.0343352	0.0207051	2.62046	14.0976	0.02879	0.013315	0.0931373	0.014867	0.0745495	0.016948	0.0575825	0.982687	97461	0.0511138	0.0312071	1.30663	4.91412	0.04218	0.014181	0.130757	0.016837	0.113663	0.020387	0.094845	0.982687	97461	0.164436
HC227	Xcc	HC227_Xcc_bin.060	99.2293	27.9511	43.6162	0.776672	2488041	1	2478	0.300388	0.0145216	-0.852519	6.05645	0.301	0.268	0.3265	0.276	0.3215	0.2845	0.3165	0.992293	119316	0.0704253	0.0557327	6.73866	55.4497	0.060512	0.035276	0.141909	0.0386425	0.113118	0.042567	0.0931805	0.988652	29161	0.0818765	0.0475908	2.96979	17.4872	0.072211	0.028583	0.204239	0.034378	0.158323	0.041234	0.127535	0.988652	29161	0.211927
HC227	Xcc	HC227_Xcc_bin.061	98.3998	89.9741	93.9985	1.62626	2672108	1	2651	0.278696	0.023587	-1.64045	8.07611	0.283	0.221125	0.312	0.2365	0.3075	0.25	0.3025	0.992036	132355	0.0838521	0.0704573	3.28867	17.1106	0.060308	0.0301948	0.287959	0.033281	0.211596	0.037235	0.154594	0.982478	30381	0.0370825	0.0376913	4.15193	25.1564	0.026538	0.0097045	0.139914	0.011636	0.094955	0.014179	0.068781	0.982478	30381	0.181663
HC227	Xcc	HC227_Xcc_bin.062	99.6107	98.6635	99.1348	0.390849	4037737	1	4020	0.283431	0.01581	-1.49133	8.706	0.285	0.247	0.3075	0.256	0.304	0.2645	0.3005	0.99753	313236	0.0836808	0.053464	3.94048	27.8377	0.069182	0.0381829	0.23575	0.041862	0.18164	0.046476	0.132619	0.995566	75078	0.0577585	0.0320579	2.22533	11.002	0.0504545	0.0203744	0.143834	0.0239888	0.116531	0.0286217	0.0940043	0.995566	75078	0.235693
HC227	Xcc	HC227_Xcc_bin.063	65.2171	86.2822	74.2851	53.3341	6235644	1	6188	0.304967	0.0208466	-0.806783	5.46779	0.307	0.257	0.341	0.269	0.335325	0.28	0.3285	0.98938	718201	0.0819326	0.0620254	4.15355	30.7289	0.068305	0.025495	0.232185	0.028917	0.170475	0.033765	0.135147	0.976525	167331	0.132924	0.0883295	1.14881	5.27254	0.113888	0.026799	0.324577	0.032329	0.289876	0.040068	0.253419	0.976525	167331	0.290221
HC227	Xcc	HC227_Xcc_bin.064	64.2019	65.5632	64.8754	55.7585	3134583	1	3119	0.284979	0.0267085	-1.09293	4.90941	0.289	0.2155	0.327	0.232	0.32005	0.2495	0.3135	0.994833	187578	0.149544	0.104758	1.76561	6.71085	0.12048	0.0347514	0.447983	0.041096	0.368553	0.0507074	0.289814	0.992808	45451	0.109246	0.0701054	1.11907	5.23579	0.099097	0.0202345	0.264775	0.025134	0.226272	0.032199	0.19575	0.992808	45451	0.255938
HC227	Xcc	HC227_Xcc_bin.065	75.4947	95.9284	84.4937	32.4596	3561941	1	3541	0.233679	0.0157008	-0.46891	3.73873	0.235	0.1995	0.26075	0.2055	0.257	0.213	0.2525	0.995204	239086	0.14916	0.0541349	0.983123	4.56398	0.139845	0.0730671	0.278767	0.080665	0.249415	0.0901555	0.220999	0.986064	55611	0.141291	0.0696239	0.657403	3.01226	0.128954	0.0421705	0.293698	0.050796	0.26867	0.061965	0.23937	0.986064	55611	0.30853
HC227	Xcc	HC227_Xcc_bin.066	99.9013	97.8897	98.8853	0.0987581	3041738	1	3031	0.279097	0.0186214	-0.952394	6.21293	0.281	0.2365	0.310625	0.2465	0.3055	0.257	0.3	0.998274	176121	0.0845685	0.0670834	3.43848	20.3731	0.062371	0.031633	0.259764	0.03503	0.20744	0.039322	0.161577	0.985794	42195	0.0497009	0.0477166	3.43093	16.7858	0.035791	0.0137055	0.217123	0.0164044	0.136461	0.019668	0.0874018	0.985794	42195	0.272329
HC227	Xcc	HC227_Xcc_bin.067	98.6627	93.583	96.0557	1.35541	2554811	1	2542	0.296193	0.0213028	-1.36993	6.82096	0.2995	0.243262	0.3275	0.257525	0.324	0.271	0.3195	0.99171	124750	0.0711876	0.0523652	3.00767	14.7385	0.0551575	0.0269267	0.232472	0.0300525	0.171484	0.033995	0.126438	0.99171	30381	0.0487075	0.0374536	2.48272	10.0596	0.037745	0.014352	0.169793	0.017146	0.141315	0.020634	0.087473	0.99171	30381	0.218292
HC227	Xcc	HC227_Xcc_bin.068	80.3055	88.9516	84.4077	24.5245	4976783	1	4915	0.237449	0.0229173	-0.989972	4.69966	0.241	0.179	0.2735	0.1925	0.268	0.208	0.262	0.985031	434778	0.153967	0.068243	1.17427	4.56056	0.135768	0.0681409	0.321361	0.0754998	0.287045	0.0847317	0.250212	0.968442	96580	0.103187	0.0884732	1.76385	5.13346	0.070358	0.0241325	0.347871	0.0290899	0.321046	0.0354207	0.272682	0.968442	96580	0.247449
HC227	Xcc	HC227_Xcc_bin.069	98.7499	99.4036	99.0757	1.26594	1800871	1	1797	0.22036	0.0139613	-0.788737	4.34777	0.222	0.187	0.24305	0.194	0.24	0.202	0.236	0.995262	63546	0.0774595	0.0461636	2.36085	9.66984	0.0625245	0.0351295	0.229256	0.0384302	0.170972	0.042305	0.131009	0.987499	15576	0.0620485	0.0452594	2.31935	9.43565	0.049386	0.0170281	0.207158	0.021009	0.161958	0.0258735	0.112302	0.987499	15576	0.271625
HC227	Xcc	HC227_Xcc_bin.070	96.0371	97.0408	96.5363	4.12643	8221977	1	8071	0.295562	0.0156195	-0.534466	4.24642	0.297	0.26	0.323625	0.268	0.319	0.2755	0.314	0.980953	1104841	0.0736975	0.047267	3.35231	27.4857	0.058207	0.029575	0.191514	0.032387	0.162769	0.036107	0.131752	0.941793	232221	0.0618152	0.0397324	1.97769	8.14226	0.050239	0.018929	0.173457	0.022334	0.142057	0.026808	0.113188	0.941793	232221	0.239541
HC227	Xcc	HC227_Xcc_bin.071	91.5913	90.5955	91.0907	9.1807	3785961	1	3755	0.318552	0.0185112	-0.948464	4.97765	0.321	0.2725	0.348	0.284	0.344	0.295	0.3395	0.990624	257403	0.0484564	0.0336515	2.71702	13.2023	0.038724	0.016973	0.149423	0.019073	0.112602	0.021861	0.0832528	0.97625	58996	0.057153	0.0338058	1.54763	6.51536	0.0489575	0.0162459	0.143983	0.0196095	0.121589	0.023878	0.101098	0.97625	58996	0.172761
HC227	Xcc	HC227_Xcc_bin.072	97.2784	98.7118	97.9898	2.79775	3584349	1	3574	0.184467	0.0140836	-0.326037	3.38332	0.1855	0.154	0.21	0.1595	0.206	0.166	0.2015	0.995975	249571	0.0456445	0.0219708	2.47197	12.7707	0.039874	0.0221	0.103162	0.024228	0.0866545	0.026882	0.070783	0.995975	61776	0.092883	0.0708051	2.24139	8.52345	0.0705395	0.0266228	0.318559	0.0314477	0.257831	0.0377635	0.181056	0.995975	61776	0.260925
HC227	Xcc	HC227_Xcc_bin.073	99.5383	90.8211	94.9801	0.463892	3686631	1	3662	0.340568	0.0208222	-2.28077	15.0966	0.343	0.294	0.3715	0.309025	0.367	0.319	0.362	0.994511	251695	0.0360965	0.052044	8.22473	84.6108	0.025396	0.0122594	0.112376	0.013762	0.0791022	0.01563	0.053872	0.988513	58653	0.0464789	0.033548	2.99576	16.2269	0.037746	0.0137379	0.139394	0.0165288	0.106888	0.019938	0.0803078	0.988513	58312	0.119605
HC227	Xcc	HC227_Xcc_bin.074	96.0099	99.3937	97.6725	4.1559	2193065	1	2175	0.192644	0.0192308	-0.299102	3.35286	0.194	0.1515	0.228825	0.15885	0.222	0.1675	0.2155	0.982553	89676	0.0791817	0.0376909	1.58721	6.64771	0.069773	0.033258	0.180728	0.037631	0.155456	0.043059	0.128292	0.970797	21321	0.138229	0.0694068	1.24993	5.23867	0.12418	0.045084	0.31967	0.055301	0.277569	0.067073	0.230617	0.970797	21321	0.24138
HC227	Xcc	HC227_Xcc_bin.075	81.7632	77.7568	79.7097	22.3044	5120937	1	5077	0.31614	0.0233253	-0.995073	5.00756	0.3195	0.259	0.354	0.273	0.348	0.286	0.3415	0.996977	486591	0.048539	0.0513224	5.65191	44.933	0.035748	0.015361	0.162981	0.0173	0.114545	0.019933	0.08089	0.994789	112575	0.0507859	0.0387238	2.62914	13.7551	0.039432	0.0128017	0.152453	0.0153317	0.119569	0.018672	0.0943612	0.994789	112575	0.16224
HC227	Xcc	HC227_Xcc_bin.076	68.8722	53.4892	60.2137	45.1966	3068687	1	2998	0.199717	0.0184554	-0.0449589	5.96245	0.2005	0.159963	0.2325	0.1695	0.227	0.1775	0.2205	0.937734	149878	0.0919139	0.0584792	3.12321	19.732	0.0771305	0.0344779	0.226142	0.0383158	0.186708	0.0433917	0.154281	0.888793	32385	0.149776	0.0760879	1.23946	5.50754	0.135033	0.0465996	0.337862	0.0571952	0.293371	0.0698248	0.249179	0.888793	32385	0.317386
HC227	Xcc	HC227_Xcc_bin.077	41.7593	44.2365	42.9622	139.468	4099726	1	4068	0.328432	0.0195761	-1.09365	6.33394	0.3305	0.281	0.3605	0.293	0.3555	0.3045	0.3505	0.994558	309291	0.0419118	0.0260178	3.57146	23.6213	0.035884	0.015898	0.104956	0.018073	0.083061	0.021026	0.066954	0.979343	71253	0.0678249	0.0404735	1.03195	4.43547	0.061279	0.014029	0.165971	0.017782	0.144493	0.022893	0.120862	0.979343	71253	0.211091
HC227	Xcc	HC227_Xcc_bin.078	57.9924	40.5742	47.7443	72.4365	4352462	1	4309	0.340733	0.0166992	-0.730775	5.35441	0.342	0.304	0.3705	0.3125	0.366	0.3215	0.361	0.994842	342378	0.0277413	0.0154748	4.03568	33.2286	0.024763	0.011324	0.0613836	0.012747	0.0517023	0.014622	0.042507	0.979936	76245	0.0549178	0.0331839	0.919686	3.68907	0.048347	0.0123911	0.13255	0.0150832	0.116829	0.018831	0.100449	0.979936	76245	0.15565
HC227	Xcc	HC227_Xcc_bin.079	99.9653	82.2823	90.2659	0.0347214	3062575	1	3021	0.302075	0.0258396	-1.16428	5.43238	0.3065	0.23775	0.34125	0.2525	0.336	0.2695	0.33	0.987169	165600	0.0723567	0.0655285	3.95893	25.0634	0.0538175	0.021601	0.259903	0.0246629	0.182178	0.028874	0.126753	0.964777	35778	0.0537642	0.031826	1.85152	7.9365	0.045601	0.0169023	0.143228	0.0203246	0.118399	0.024504	0.0933952	0.964777	35778	0.212667
HC227	Xcc	HC227_Xcc_bin.080	71.6654	97.2287	82.5125	39.5374	8542719	1	8430	0.308234	0.0165948	-0.619331	5.13992	0.3095	0.2715	0.337137	0.2795	0.3325	0.2875	0.327	0.971867	1268028	0.0504448	0.026991	1.95099	9.79188	0.04372	0.01986	0.11959	0.021969	0.1011	0.024803	0.084193	0.940512	285390	0.0833784	0.0529088	1.25247	4.75265	0.067735	0.021334	0.213533	0.0252475	0.185363	0.0306749	0.157838	0.940512	285390	0.239247
HC227	Xcc	HC227_Xcc_bin.081	88.4095	75.6076	81.509	13.11	2722110	1	2684	0.226585	0.0248996	0.0180713	3.55441	0.227	0.177537	0.2785	0.1855	0.2665	0.196	0.2575	0.987072	127765	0.123641	0.0832494	2.212	9.41498	0.097238	0.042818	0.369848	0.0481374	0.290244	0.0550234	0.222525	0.966919	27261	0.0598928	0.0500749	2.08101	8.51978	0.041681	0.012881	0.209276	0.015919	0.16632	0.019686	0.126124	0.966919	27261	0.225469
HC227	Xcc	HC227_Xcc_bin.082	86.1061	92.8406	89.3466	16.1358	6161634	1	6127	0.295531	0.0239385	-0.941403	4.30618	0.3	0.237	0.332	0.2485	0.3275	0.2625	0.322	0.997514	721801	0.0749979	0.0748275	2.67625	11.0647	0.047085	0.020462	0.312987	0.022851	0.250665	0.026084	0.16182	0.993411	172578	0.0568256	0.0488308	2.31158	9.49453	0.040048	0.01308	0.202314	0.0154999	0.158132	0.0187357	0.117032	0.993411	172578	0.180418
HC227	Xcc	HC227_Xcc_bin.083	46.6091	55.5692	50.6963	114.55	3245985	1	3118	0.223033	0.0160753	-0.275245	4.08012	0.2235	0.189963	0.2525	0.1965	0.2475	0.2035	0.242	0.888589	133903	0.15233	0.0573538	0.757519	4.47038	0.149407	0.0653892	0.283384	0.0728242	0.250464	0.0834018	0.221881	0.748254	22366	0.151541	0.0887827	0.330605	2.18621	0.148282	0.027	0.319304	0.035298	0.293509	0.045072	0.266331	0.748254	22366	0.300488
HC227	Xcc	HC227_Xcc_bin.084	97.7118	74.4559	84.5132	2.34184	2855153	1	2819	0.33001	0.0189873	-0.933532	5.40226	0.332	0.286725	0.362	0.296	0.3575	0.306	0.351	0.989361	144453	0.0307166	0.0221119	3.85953	25.8434	0.024489	0.01169	0.0863224	0.013098	0.0681444	0.014894	0.051657	0.977683	32640	0.0851515	0.0540025	2.6136	12.4414	0.0721035	0.0278544	0.25169	0.0335719	0.181725	0.0404093	0.137097	0.977683	32640	0.180518
HC227	Xcc	HC227_Xcc_bin.085	48.1307	96.6742	64.2658	107.767	3710312	1	3666	0.190799	0.0177105	-0.479996	3.88567	0.192	0.1495	0.2225	0.159	0.2175	0.1685	0.212	0.979309	248160	0.0615956	0.0289314	1.54954	6.67853	0.055599	0.024641	0.138546	0.0278609	0.119668	0.03234	0.0983732	0.964886	56616	0.19214	0.0935574	0.416896	2.47571	0.183163	0.0525591	0.385901	0.0640258	0.356821	0.0784165	0.321979	0.964886	56616	0.302817
HC227	Xcc	HC227_Xcc_bin.086	59.1155	74.8292	66.0506	69.1602	4732415	1	4668	0.33462	0.015334	-0.460648	4.98397	0.3345	0.3045	0.3635	0.311	0.3585	0.3165	0.35365	0.989646	391170	0.0265318	0.0102258	1.15989	5.1701	0.024814	0.012084	0.0526828	0.013543	0.0462755	0.0154779	0.039689	0.961782	82215	0.0347662	0.0181722	1.25979	5.97445	0.03147	0.0104308	0.0777392	0.0125597	0.0678119	0.015267	0.0583758	0.961782	82215	0.154195
HC227	Xcc	HC227_Xcc_bin.087	97.609	98.4785	98.0418	2.4496	4494129	1	4452	0.248616	0.0185329	-1.0315	5.97502	0.2505	0.204	0.279	0.2165	0.2745	0.2275	0.269	0.991962	369370	0.109729	0.0532864	2.70311	14.3091	0.09606	0.054582	0.257144	0.059379	0.206747	0.06548	0.166274	0.976974	84255	0.0267526	0.0200435	4.49597	35.3707	0.022087	0.00862235	0.0775308	0.0102547	0.0577186	0.0122324	0.0437356	0.976974	84255	0.16961
HC227	Xcc	HC227_Xcc_bin.088	91.2259	74.0134	81.7232	9.61799	1584710	1	1467	0.256294	0.0180572	-0.880215	4.28805	0.259	0.2135	0.284675	0.224	0.281	0.2325	0.276	0.75267	19306	0.0920401	0.0517125	2.15528	9.26392	0.078058	0.0392267	0.244873	0.04356	0.200071	0.049163	0.153347	0.543112	2556	0.0405625	0.0355783	3.9853	23.9718	0.032226	0	0.144004	0.0131888	0.0874625	0.016848	0.0660125	0.543112	2556	0.135369
HC227	Xcc	HC227_Xcc_bin.089	95.203	87.4888	91.183	5.0387	2304109	1	2274	0.163942	0.0145846	-0.210495	3.14943	0.1645	0.1345	0.190087	0.139	0.186675	0.1455	0.182	0.978166	92665	0.0326647	0.0138356	1.92848	10.4729	0.029447	0.015951	0.0666834	0.0175242	0.058553	0.019587	0.0500512	0.965183	20706	0.156612	0.0755548	1.29001	5.84656	0.143059	0.0513205	0.346823	0.0637237	0.299602	0.078396	0.252863	0.965183	20706	0.237617
HC227	Xcc	HC227_Xcc_bin.090	71.1729	68.5947	69.86	40.5029	3938307	1	3913	0.322129	0.0156541	-0.945786	6.6928	0.323	0.2884	0.3491	0.296	0.345	0.3035	0.34	0.995783	292230	0.0305996	0.0141995	2.08977	10.7834	0.027711	0.013436	0.0678876	0.014961	0.055605	0.0169839	0.0468381	0.992049	69378	0.0580551	0.0268564	1.19984	5.5284	0.053229	0.0203621	0.123226	0.0243477	0.108432	0.0293934	0.0930593	0.992049	69378	0.182094
HC227	Xcc	HC227_Xcc_bin.091	81.2438	51.2821	62.8761	23.0863	3736581	0.999732	3705	0.313607	0.0159717	-1.10398	7.04159	0.315	0.2765	0.3405	0.2866	0.3359	0.295	0.3315	0.994052	254541	0.035794	0.022507	5.099	45.636	0.030741	0.016115	0.0879305	0.017748	0.068206	0.019897	0.054374	0.992114	58996	0.0485154	0.0249032	1.30541	5.78604	0.0433695	0.0156519	0.10995	0.0186972	0.0954653	0.022686	0.081118	0.992114	58996	0.179498
HC227	Xcc	HC227_Xcc_bin.092	89.7474	84.1531	86.8603	11.4239	3097686	1	3065	0.238334	0.018778	-0.703892	4.73444	0.24	0.1945	0.2697	0.205	0.2654	0.2155	0.2595	0.985354	170236	0.197268	0.0645706	1.27272	6.27962	0.185357	0.107255	0.360694	0.118789	0.318903	0.131621	0.27879	0.979357	39621	0.12386	0.076647	3.54542	21.1688	0.109641	0.043355	0.306627	0.052054	0.225194	0.062759	0.18451	0.979357	39621	0.230588
HC227	Xcc	HC227_Xcc_bin.093	93.3155	98.6989	95.9317	7.16335	5217941	1	5170	0.254736	0.0191747	-0.430663	4.52683	0.2555	0.214	0.2895	0.2235	0.284	0.231	0.2775	0.979408	494515	0.130967	0.0588951	1.72707	7.42441	0.115554	0.0620469	0.288699	0.067851	0.247446	0.075386	0.207155	0.962981	116403	0.0971328	0.0519154	1.76004	8.56174	0.085589	0.0324144	0.224835	0.038367	0.193852	0.0459892	0.163056	0.962981	116403	0.277025
HC227	Xcc	HC227_Xcc_bin.094	97.5698	92.0586	94.7341	2.49068	4015551	1	4003	0.219041	0.0202053	-0.631928	4.19111	0.2205	0.172025	0.254	0.182	0.2485	0.194	0.2425	0.996391	314028	0.0853511	0.0478984	2.60617	13.6696	0.071378	0.0375657	0.213634	0.0413113	0.175165	0.0460857	0.141518	0.994762	76245	0.0647575	0.0543289	2.58539	11.0124	0.047106	0.0171601	0.23871	0.0205012	0.17683	0.024758	0.128692	0.994762	76245	0.246909
HC227	Xcc	HC227_Xcc_bin.095	99.0735	96.8777	97.9633	0.93514	3884070	1	3869	0.292559	0.0168471	-0.329391	4.07381	0.293	0.25735	0.325	0.265	0.319	0.272	0.313	0.998423	294528	0.0566351	0.0320177	4.08994	34.4855	0.04868	0.025419	0.133219	0.028148	0.110051	0.03161	0.0893686	0.996292	71253	0.036997	0.0268986	2.94817	14.8105	0.029692	0.0116806	0.119024	0.0139016	0.0878426	0.016506	0.0633776	0.996292	71253	0.254535
HC227	Xcc	HC227_Xcc_bin.096	50.0539	27.2191	35.2626	99.7848	3382920	1	3349	0.334625	0.0192516	-1.04744	6.31098	0.336	0.291	0.367	0.3035	0.3615	0.312	0.3565	0.993094	208335	0.0316756	0.0275494	7.05005	73.3596	0.026088	0.012542	0.0863781	0.014153	0.059701	0.016253	0.0468936	0.984888	47586	0.0532691	0.0274024	1.07312	4.62428	0.048644	0.0150666	0.121662	0.0186508	0.10608	0.0232135	0.0890425	0.984888	47586	0.144432
HC227	Xcc	HC227_Xcc_bin.097	75.773	93.1605	83.5719	31.9731	3080724	1	3037	0.264885	0.0222877	-0.76891	5.1418	0.267	0.2119	0.30505	0.224	0.2971	0.237	0.2892	0.971612	163878	0.184747	0.0873104	1.22784	5.02849	0.166723	0.0721169	0.407847	0.0814716	0.354537	0.093763	0.300368	0.936844	35511	0.174956	0.107115	0.84946	3.09023	0.142107	0.0413195	0.414482	0.050551	0.37407	0.062753	0.331746	0.936844	35511	0.311291
HC227	Xcc	HC227_Xcc_bin.098	78.9736	53.4868	63.7782	26.6245	1853582	1	1807	0.164648	0.0175304	-0.0474638	3.11793	0.165	0.129575	0.197	0.13515	0.193	0.1425	0.1865	0.947144	53301	0.0355211	0.0192976	1.7621	6.97983	0.030064	0.014269	0.0917565	0.016046	0.076347	0.018238	0.060279	0.894894	10878	0.148405	0.109771	1.50455	5.04572	0.108522	0.0347153	0.435551	0.04355	0.375214	0.0533385	0.317027	0.894894	10878	0.238602
HC227	Xcc	HC227_Xcc_bin.099	94.7528	96.2368	95.489	5.53782	5756455	1	5711	0.224921	0.0149789	-0.949557	5.5382	0.2265	0.1915	0.2495	0.1985	0.246	0.2065	0.242	0.990812	617716	0.125653	0.0475667	1.6676	7.35869	0.114255	0.067308	0.251732	0.072932	0.22001	0.079984	0.18678	0.981579	144453	0.0843496	0.0518671	2.28328	10.1372	0.071368	0.0279399	0.240446	0.0329544	0.189926	0.0393562	0.140715	0.981579	144453	0.265611
HC227	Xcc	HC227_Xcc_bin.100	98.5909	96.8832	97.7296	1.42926	6979604	1	6941	0.289549	0.0126971	-0.211129	3.62551	0.29	0.264	0.3135	0.2685	0.3095	0.2735	0.3055	0.993617	922761	0.0541299	0.0283453	2.37084	12.7061	0.045997	0.024088	0.127197	0.026437	0.10866	0.029457	0.089032	0.986464	220780	0.0444989	0.0305272	1.9421	7.5893	0.035043	0.012855	0.130741	0.015168	0.109236	0.0182419	0.086059	0.986464	220780	0.236068
HC227	Xcc	HC227_Xcc_bin.101	97.4799	78.6866	87.0808	2.58528	1987278	1	1958	0.196522	0.0179975	-0.0434077	3.2579	0.19675	0.160463	0.2315	0.1655	0.2255	0.1725	0.2185	0.984899	68265	0.0764591	0.0367813	1.78464	7.53432	0.066257	0.0343206	0.178918	0.0384212	0.148791	0.0432444	0.123369	0.960261	15051	0.08698	0.0518554	2.65509	14.5431	0.075625	0.0290068	0.21211	0.0351505	0.171918	0.042169	0.141208	0.960261	15051	0.177821
HC227	Xcc	HC227_Xcc_bin.102	97.8983	92.0027	94.8589	2.14686	4545097	1	4499	0.329919	0.0172267	-1.51947	9.631	0.3315	0.292225	0.3575	0.302	0.354	0.3105	0.349	0.986139	373680	0.0332954	0.0477418	10.4451	132.001	0.024667	0.012426	0.0886242	0.013789	0.0641001	0.015566	0.050458	0.974617	85491	0.0526674	0.0338673	3.09029	18.3658	0.044701	0.017178	0.137528	0.0204205	0.108573	0.024535	0.086881	0.974617	85491	0.173116
HC227	Xcc	HC227_Xcc_bin.103	75.3854	69.9833	72.584	32.6517	4369746	1	4299	0.276417	0.02549	-1.03909	5.36404	0.279	0.214	0.318	0.22895	0.3125	0.2455	0.305	0.976915	327645	0.109503	0.0771593	2.55046	11.3319	0.086125	0.0373991	0.344397	0.042834	0.276382	0.0497534	0.195419	0.947605	70500	0.0504233	0.0272637	1.46153	6.52174	0.0446415	0.0152354	0.12006	0.0184949	0.102184	0.022604	0.0853607	0.947605	70500	0.174913
HC227	Xcc	HC227_Xcc_bin.104	95.637	89.0347	92.2178	4.56207	3331291	1	3315	0.222649	0.0209135	-0.603065	3.90386	0.2245	0.172	0.258	0.18435	0.2525	0.195	0.2465	0.994159	211575	0.0932698	0.050041	2.1124	9.75913	0.078088	0.0407824	0.231137	0.0451684	0.192571	0.0503934	0.157285	0.98836	51040	0.0365342	0.0288282	2.21243	8.35622	0.0270285	0.0100348	0.126805	0.01179	0.104336	0.0142059	0.0717601	0.98836	51040	0.242601
HC227	Xcc	HC227_Xcc_bin.105	45.873	39.7005	42.5641	117.993	4126333	1	4100	0.322644	0.0164736	-0.25826	3.9361	0.323	0.289	0.354	0.296	0.348525	0.3025	0.343	0.994964	322003	0.0366357	0.0142893	1.60735	8.06286	0.034013	0.017206	0.0722187	0.019432	0.062443	0.02211	0.053928	0.977169	75078	0.0771437	0.0356088	1.06144	5.3418	0.071785	0.0252685	0.158733	0.0306339	0.141343	0.0375457	0.123852	0.977169	75078	0.205035
HC227	Xcc	HC227_Xcc_bin.106	81.6914	99.5565	89.7435	22.4119	5657266	1	5618	0.323913	0.0144855	-0.743685	5.49431	0.325	0.2915	0.3495	0.2995	0.345	0.3065	0.3405	0.989349	593505	0.0412352	0.0239867	4.24109	39.1162	0.034606	0.01831	0.0951132	0.020052	0.0798658	0.022265	0.067078	0.982774	139128	0.0663111	0.0407212	1.98349	8.78599	0.054957	0.0209783	0.174512	0.0248553	0.148352	0.0297784	0.120298	0.982774	138602	0.218371
HC227	Xcc	HC227_Xcc_bin.107	84.1822	55.8981	67.1847	18.79	3165934	1	3136	0.332498	0.0163046	-0.543936	5.14865	0.333	0.299	0.3635	0.306	0.358	0.3125	0.353	0.992818	184528	0.0289014	0.0133615	1.73124	8.16566	0.025933	0.012298	0.06294	0.013843	0.0537646	0.0158147	0.04539	0.979523	42778	0.0689506	0.044766	1.90716	8.10338	0.0554575	0.0201454	0.188005	0.0242155	0.157447	0.0292505	0.128404	0.979523	42778	0.176256
HC227	Xcc	HC227_Xcc_bin.108	91.8521	71.0395	80.1162	8.8707	3884267	1	3842	0.211446	0.0228307	-0.0158898	3.30307	0.2115	0.165	0.2565	0.173	0.248	0.183	0.24	0.994254	267546	0.114454	0.0644543	2.032	8.6489	0.09652	0.0441586	0.298423	0.050026	0.243222	0.0575355	0.192571	0.966645	59340	0.0751995	0.0446789	1.69698	6.8858	0.0633295	0.0230139	0.199053	0.027682	0.167825	0.0334947	0.133911	0.966645	59340	0.231023
HC227	Xcc	HC227_Xcc_bin.109	52.9175	69.3237	60.0197	88.9733	6950393	1	6801	0.287873	0.0194335	-0.527533	4.9361	0.289	0.2435	0.3245	0.2545	0.3165	0.265	0.3095	0.95154	771903	0.101221	0.0612094	2.51841	12.2432	0.087579	0.037093	0.279541	0.041335	0.210772	0.04731	0.163906	0.885377	161596	0.115579	0.0748663	1.01621	4.03205	0.101165	0.0226876	0.293115	0.027619	0.260142	0.034651	0.222217	0.885377	161596	0.290265
HC227	Xcc	HC227_Xcc_bin.110	72.1417	1.64314	3.2131	38.6161	111640	1	100	0.262863	0.016771	-0.898088	5.81906	0.264	0.231925	0.288	0.238425	0.287025	0.2434	0.28205	0.666499	66	0.109593	0.0715941	0.0598368	2.1153	0.107423	0	0.236439	0	0.227881	0	0.20422	0.261591	3	0.0168923	0.0292584	0.707107	1.5	0	0	0.0481432	0	0.0456093	0	0.0405416	0.261591	3	0.0551737
HC227	Xcc	HC227_Xcc_bin.111	51.5439	47.8324	49.6188	94.0093	5202898	1	5151	0.316075	0.0254243	-1.02775	4.77319	0.32	0.2535	0.354625	0.2675	0.35	0.2815	0.3445	0.994118	492528	0.0709076	0.0634181	2.92655	13.9307	0.051598	0.017412	0.258862	0.02029	0.195418	0.02426	0.134144	0.968356	112101	0.0881202	0.052882	1.63302	7.06503	0.076181	0.022542	0.228254	0.028043	0.192146	0.03556	0.156054	0.968356	112101	0.219615
HC227	Xcc	HC227_Xcc_bin.112	97.6691	94.8436	96.2356	2.38657	3200250	1	3179	0.24454	0.0224309	-0.975828	4.3656	0.248	0.188225	0.279	0.2	0.275	0.215	0.269	0.981331	191271	0.130526	0.0718995	1.96757	7.40934	0.106044	0.0607142	0.343116	0.065778	0.288635	0.072097	0.227856	0.967533	45753	0.0897365	0.0424012	1.68716	8.55782	0.082035	0.0329556	0.194088	0.0395272	0.164051	0.0471244	0.140109	0.967533	45753	0.248538
HC227	Xcc	HC227_Xcc_bin.113	89.357	93.5104	91.3865	11.9107	2150228	1	2105	0.196407	0.0168897	-0.485022	3.50864	0.1975	0.157	0.2257	0.1661	0.222	0.175	0.216	0.959488	75466	0.0765589	0.0336973	1.64126	7.17636	0.0685065	0.0354516	0.165644	0.0396408	0.142517	0.044598	0.119221	0.911775	15753	0.133426	0.0846492	1.51517	5.6524	0.10882	0.0349698	0.368464	0.0442206	0.310433	0.0542518	0.250699	0.911775	15753	0.264226
HC227	Xcc	HC227_Xcc_bin.114	50.879	32.6391	39.7673	96.5446	3201764	1	3174	0.210843	0.0200494	-0.393997	3.85649	0.2125	0.166	0.246337	0.1765	0.2405	0.185	0.23435	0.98616	188805	0.103176	0.0466334	1.57657	8.78	0.096612	0.040602	0.211454	0.0457142	0.184132	0.052717	0.159308	0.98047	43956	0.116384	0.0641137	1.16523	5.02502	0.106865	0.0294665	0.282841	0.0365917	0.237694	0.0461895	0.197148	0.98047	43956	0.270553
HC227	Xcc	HC227_Xcc_bin.115	98.9914	86.0876	92.0897	1.01891	5888194	1	5817	0.336603	0.0204904	-1.92298	10.3851	0.34	0.287	0.365	0.3019	0.362	0.314	0.3575	0.99147	603351	0.0321116	0.0424159	8.20754	88.8095	0.023171	0.01077	0.107039	0.012042	0.069656	0.013699	0.049424	0.965091	131328	0.05517	0.0400077	2.83329	14.3223	0.044326	0.016355	0.173049	0.019491	0.12998	0.023431	0.0954836	0.965091	130307	0.13182
HC227	Xcc	HC227_Xcc_bin.116	99.1109	96.4747	97.775	0.897123	3679822	1	3653	0.256427	0.0264945	-1.20241	4.94672	0.2615	0.1875	0.2935	0.2045	0.2892	0.2215	0.2845	0.995495	247456	0.104815	0.0731449	2.39487	9.86268	0.080497	0.0396604	0.332255	0.043703	0.262804	0.0490855	0.192439	0.986634	56616	0.0208884	0.0229281	8.48571	94.7593	0.0164495	0.006445	0.0570071	0.007613	0.0444162	0.009113	0.033134	0.986634	56616	0.183857
HC227	Xcc	HC227_Xcc_bin.117	60.6734	83.0783	70.1299	64.8169	3850627	1	3748	0.222184	0.023072	-0.725616	4.25405	0.2255	0.1645	0.2605	0.176	0.253325	0.1915	0.247	0.918373	222778	0.14703	0.0686147	1.43196	6.1886	0.132118	0.0588253	0.326333	0.068	0.277891	0.078084	0.234388	0.881382	46971	0.129836	0.0790981	1.02031	3.79737	0.110437	0.031424	0.319728	0.0382855	0.283619	0.047347	0.243385	0.881382	46971	0.247427
HC227	Xcc	HC227_Xcc_bin.118	53.7809	37.3346	44.0735	85.9397	2639685	1	2567	0.279646	0.0262665	-1.05391	5.49321	0.282	0.212725	0.3235	0.233	0.3165	0.248	0.309	0.922626	102378	0.113137	0.0901366	2.8886	12.8273	0.0862145	0.0366998	0.421296	0.0422259	0.287032	0.0493844	0.207167	0.861483	20706	0.0584248	0.0334336	2.02565	10.3468	0.051155	0.0175185	0.138687	0.0218025	0.118573	0.026712	0.098785	0.861483	20706	0.20016
HC227	Xcc	HC227_Xcc_bin.119	67.4601	32.0095	43.4176	48.2358	787519	1	772	0.188447	0.0175155	-0.321938	3.0956	0.189222	0.151638	0.220362	0.157775	0.216	0.1655	0.2095	0.991226	9870	0.0584689	0.0319169	0.375778	2.18418	0.0550495	0.0155747	0.121098	0.018409	0.112119	0.021719	0.101975	0.955747	2080	0.131697	0.102882	0.548281	2.09182	0.093525	0	0.342466	0.019838	0.311909	0.0258418	0.275298	0.955747	2080	0.234508
HC227	Xcc	HC227_Xcc_bin.120	58.2957	26.5428	36.4771	71.5392	2202796	1	2116	0.251347	0.0239127	-0.91022	4.58823	0.2545	0.1885	0.2895	0.20475	0.2835	0.2205	0.2775	0.88038	62835	0.170175	0.0810399	1.48054	5.80877	0.149648	0.0718675	0.39248	0.0810597	0.337619	0.0925328	0.278482	0.760362	11026	0.0770127	0.0534376	2.17889	9.43418	0.0624345	0.0200255	0.235296	0.0253595	0.183483	0.031739	0.138209	0.760362	11026	0.230562
HC227	Xcc	HC227_Xcc_bin.121	51.208	17.3092	25.8729	95.2821	1656803	1	1606	0.249192	0.0294619	-0.693428	3.26996	0.2535	0.1795	0.2945	0.192	0.29	0.2075	0.2835	0.932574	38781	0.160626	0.0950177	1.57	5.57676	0.131081	0.054416	0.427843	0.064159	0.368494	0.075458	0.295949	0.841292	7260	0.0643732	0.0335499	1.2544	5.41656	0.057556	0.0189922	0.155834	0.0241744	0.128832	0.0303969	0.106715	0.841292	7260	0.190422
HC227	Xcc	HC227_Xcc_bin.122	96.517	98.226	97.364	3.60874	3049946	1	3003	0.131691	0.0166293	0.240175	3.15797	0.131	0.1015	0.164975	0.106	0.16	0.1111	0.154	0.971777	156520	0.0198429	0.0167788	3.61863	19.3748	0.015167	0.00649197	0.0733896	0.007451	0.0466561	0.008696	0.0335981	0.94451	34453	0.118068	0.0633206	1.42626	6.02569	0.104383	0.0367833	0.283947	0.0444652	0.24061	0.054095	0.200011	0.94451	34192	0.176559
HC227	Xcc	HC227_Xcc_bin.123	56.655	53.5205	55.0432	76.5071	4687401	1	4626	0.294418	0.0299619	-1.09514	4.77877	0.2995	0.2175	0.34	0.237	0.3335	0.2545	0.327	0.988427	385003	0.085197	0.102059	3.04841	12.6871	0.049372	0.02034	0.453907	0.023016	0.331143	0.026662	0.173921	0.967787	85905	0.0479218	0.0368896	2.24056	9.13541	0.036637	0.0121962	0.158371	0.014725	0.128767	0.018085	0.0951384	0.967787	85905	0.157265
HC227	Xcc	HC227_Xcc_bin.124	61.5349	57.2949	59.3393	62.5094	4808102	1	4749	0.306594	0.0252196	-1.26263	5.98368	0.311	0.24485	0.3445	0.259	0.3395	0.2755	0.3335	0.995669	410871	0.0446439	0.0436983	5.55916	46.5205	0.033474	0.0156958	0.158408	0.01765	0.104168	0.020179	0.072081	0.969978	90100	0.0357355	0.0206803	1.88349	8.96878	0.0308735	0.0109809	0.090191	0.013215	0.0754323	0.0160299	0.0613453	0.969978	90100	0.124652
HC227	Xcc	HC227_Xcc_bin.125	98.6155	95.7796	97.1769	1.40393	3496300	1	3447	0.359588	0.0148034	-0.726669	4.43086	0.3615	0.3275	0.3845	0.334	0.381	0.3405	0.377	0.988417	210925	0.0169299	0.00963039	2.84398	14.2938	0.014526	0.007328	0.0458513	0.0081722	0.034676	0.00924	0.0260416	0.960227	44850	0.0389031	0.0236247	2.78401	16.8292	0.033749	0.0122129	0.0975785	0.0148574	0.0791684	0.0179879	0.0642676	0.960227	23090	0.163394
HC227	Xcc	HC227_Xcc_bin.126	83.6922	55.9653	67.0764	19.4854	4983184	1	4956	0.309403	0.0133434	-0.624277	5.69242	0.31	0.281	0.334	0.287375	0.3295	0.293	0.3245	0.994099	469965	0.0398235	0.0164802	3.49354	28.3993	0.036509	0.020904	0.076158	0.022779	0.0662788	0.025168	0.05736	0.985533	112101	0.0610685	0.0301029	1.44924	6.36016	0.054682	0.021755	0.139729	0.025614	0.119803	0.03051	0.09993	0.985533	112101	0.227036
HC227	Xcc	HC227_Xcc_bin.127	92.6307	63.5403	75.3761	7.95562	2322745	1	2304	0.311895	0.0207492	-1.58111	8.99461	0.3145	0.2625	0.344212	0.2775	0.3395	0.2875	0.3335	0.993231	100128	0.0484198	0.0507301	7.72599	80.943	0.0377565	0.0175472	0.13658	0.019696	0.100499	0.0224277	0.0749499	0.980542	23220	0.063921	0.0390292	1.54737	5.99696	0.0522115	0.0186501	0.166697	0.0227816	0.145378	0.0277027	0.119898	0.980542	23220	0.225096
HC227	Xcc	HC227_Xcc_bin.128	97.9881	93.6532	95.7716	2.05326	5046503	0.999802	4933	0.34073	0.0142345	-1.06378	7.3	0.3415	0.311	0.365	0.3175	0.3615	0.324	0.357	0.979196	410871	0.0287983	0.0206159	6.63157	70.9818	0.024257	0.012624	0.068667	0.013917	0.054875	0.015601	0.04419	0.92508	82621	0.0330648	0.0189414	2.0091	9.43019	0.028616	0.010678	0.083585	0.012747	0.068722	0.015418	0.055667	0.92508	82621	0.144544
HC227	Xcc	HC227_Xcc_bin.129	94.1966	51.0983	66.2554	6.16094	1947757	0.999487	1932	0.180369	0.0156079	-0.255546	3.42086	0.1815	0.147	0.207363	0.1535	0.2035	0.1595	0.198975	0.980486	69378	0.0394	0.017798	2.03718	10.4993	0.03518	0.0185714	0.0855427	0.020612	0.0731152	0.0230837	0.0609883	0.959411	16110	0.125752	0.0722998	2.10362	9.33991	0.109773	0.0406451	0.34791	0.0507396	0.262001	0.0613459	0.201423	0.959411	16110	0.223994
HC227	Xcc	HC227_Xcc_bin.130	99.5084	81.0273	89.3219	0.494018	2744565	1	2710	0.210474	0.0204622	-0.656607	3.47314	0.213	0.161862	0.244	0.1715	0.2395	0.1815	0.234	0.993383	132355	0.101362	0.0534424	1.87943	7.71875	0.085563	0.0430914	0.249155	0.048488	0.214602	0.054759	0.17352	0.974027	29161	0.070749	0.0498964	1.70275	6.33253	0.055077	0.017074	0.207327	0.021155	0.17673	0.026312	0.141513	0.974027	29161	0.217435
HC227	Xcc	HC227_Xcc_bin.131	67.2462	61.8655	64.4437	48.7073	5693539	1	5624	0.321529	0.0224405	-1.10111	5.47752	0.32425	0.266	0.3575	0.279	0.352	0.294	0.346	0.995378	574056	0.0456036	0.0374171	4.15098	27.1556	0.03606	0.014901	0.141677	0.017021	0.10353	0.019875	0.076571	0.964543	125250	0.0569184	0.0333455	1.3138	5.51612	0.0509855	0.0142465	0.144318	0.0172904	0.120817	0.021494	0.0992362	0.964543	125250	0.165855
HC227	Xcc	HC227_Xcc_bin.132	99.3531	89.9814	94.4353	0.651102	1589297	1	1553	0.14621	0.0163629	0.0704073	2.96131	0.14596	0.1149	0.179	0.1195	0.174	0.126	0.1679	0.959623	39621	0.0166204	0.00860388	1.84811	9.09467	0.014516	0.006641	0.0380095	0.00744	0.032815	0.008516	0.027738	0.910369	8001	0.0648574	0.0336565	1.30708	5.70946	0.057884	0.019545	0.151223	0.025709	0.129791	0.031435	0.10933	0.910369	8001	0.148743
HC227	Xcc	HC227_Xcc_bin.133	80.8456	86.3496	83.507	23.6926	1809183	1	1744	0.190094	0.0132317	-0.0683836	4.95119	0.1905	0.162288	0.2135	0.1675	0.21	0.174	0.2055	0.935919	45753	0.0549649	0.025664	1.60699	6.59832	0.047782	0.025772	0.123755	0.0284266	0.106468	0.031453	0.0898204	0.827884	7875	0.140785	0.0908012	1.6252	5.8722	0.11595	0.0348607	0.400255	0.0468216	0.348788	0.0589714	0.265551	0.827884	7875	0.266596
HC227	Xcc	HC227_Xcc_bin.134	16.1878	7.54098	10.2889	517.748	4031518	1	3861	0.30711	0.0189138	-0.462632	4.42253	0.308	0.267	0.3415	0.2745	0.336	0.2835	0.33	0.890327	203841	0.0583618	0.0268438	1.60665	7.99162	0.053105	0.022959	0.125765	0.02646	0.109045	0.030942	0.092174	0.762882	34191	0.115768	0.0550623	0.815559	4.04104	0.108538	0.0340263	0.242527	0.0420525	0.216118	0.052425	0.18831	0.762882	34191	0.291598
HC227	Xcc	HC227_Xcc_bin.135	94.7553	89.4053	92.0026	5.53504	4707740	1	4580	0.349011	0.0167995	-0.762843	7.56929	0.349	0.3175	0.3805	0.323	0.375	0.3295	0.369019	0.953101	326836	0.0204945	0.0123907	5.43861	49.5603	0.0181	0.008885	0.0416171	0.009898	0.036007	0.011202	0.030921	0.870769	58311	0.0478725	0.0318649	3.97271	30.3095	0.040926	0.0153815	0.120618	0.018494	0.098641	0.022302	0.078346	0.870769	57971	0.137437
HC227	Xcc	HC227_Xcc_bin.136	98.8246	88.3154	93.2749	1.18933	4918348	1	4821	0.339235	0.0165037	-1.57636	8.5862	0.3415	0.299	0.3645	0.312	0.361	0.321	0.3565	0.973185	388521	0.0239623	0.017458	3.74033	22.0175	0.019253	0.009658	0.07295	0.010693	0.054236	0.012009	0.038431	0.912189	77028	0.0322792	0.0176255	2.11929	10.4524	0.028384	0.0111983	0.0789192	0.0132494	0.063902	0.0158227	0.0524793	0.912189	77028	0.163329
HC227	Xcc	HC227_Xcc_bin.137	69.3171	62.0225	65.4672	44.2646	2580203	1	2571	0.187851	0.015436	-0.120621	3.80146	0.188	0.156	0.217	0.16175	0.2125	0.1685	0.207	0.995112	128271	0.0493314	0.0199131	1.91427	10.7785	0.045611	0.0235348	0.0981642	0.026324	0.084809	0.029708	0.072839	0.995112	30876	0.164179	0.0793354	0.636009	2.98912	0.150554	0.0498569	0.339272	0.0604665	0.310534	0.0739115	0.275689	0.995112	30876	0.242274
HC227	Xcc	HC227_Xcc_bin.138	42.7381	37.4812	39.9374	133.983	2528964	1	2500	0.181667	0.0170312	-0.133803	3.2936	0.182	0.1465	0.2135	0.152	0.208025	0.159	0.20255	0.982778	113526	0.0523762	0.025402	1.63873	7.05935	0.04623	0.021526	0.120282	0.0243405	0.102427	0.0278645	0.085412	0.965958	26335	0.216839	0.10748	0.591701	2.9537	0.203406	0.055904	0.459263	0.0698333	0.420769	0.0880856	0.369971	0.965958	26335	0.271004
HC227	Xcc	HC227_Xcc_bin.139	93.0052	72.5422	81.509	7.52086	2923161	1	2856	0.342232	0.0208526	-1.10547	6.0616	0.3445	0.292375	0.376312	0.3065	0.371	0.3175	0.3655	0.971367	133386	0.0278856	0.0195382	3.19469	19.8581	0.0221925	0.010008	0.082615	0.011288	0.065168	0.012919	0.0496455	0.906255	25200	0.0400881	0.02472	1.47417	5.73824	0.0328695	0.0112627	0.103859	0.0136079	0.0905858	0.016628	0.0753371	0.906255	25200	0.126979
HC227	Xcc	HC227_Xcc_bin.140	35.6471	29.0531	32.0141	180.528	7071305	0.999859	6214	0.335605	0.0169662	-0.916133	5.1021	0.337187	0.2955	0.3635	0.305	0.3595	0.315	0.355	0.530316	192510	0.0261784	0.0172231	4.73024	44.9143	0.0219	0.009966	0.0663465	0.011286	0.0544792	0.012951	0.043467	0.318048	16653	0.0479783	0.0231548	1.24882	5.99653	0.043907	0.0158291	0.104753	0.0196946	0.0912138	0.0238756	0.0777346	0.318048	16653	0.193933
HC227	Xcc	HC227_Xcc_bin.141	98.5589	41.9491	58.8501	1.46217	3272920	1	3202	0.339997	0.0147536	-0.996714	6.0666	0.3415	0.3085	0.364	0.315	0.361	0.322	0.3565	0.967214	168490	0.0260636	0.0147155	3.28874	22.7916	0.022154	0.011418	0.0646263	0.012673	0.0538855	0.014288	0.0425791	0.919276	34716	0.0314085	0.0179973	1.93751	9.22484	0.0270375	0.0100877	0.0796185	0.0121	0.0660805	0.014592	0.0534285	0.919276	34716	0.143306
HC227	Xcc	HC227_Xcc_bin.142	99.4555	93.2732	96.2652	0.547465	3048759	1	2964	0.335544	0.0181747	-1.09561	8.75422	0.336	0.2985	0.367463	0.3075	0.362425	0.315	0.35685	0.966519	138075	0.0288242	0.0187791	5.40359	52.335	0.024284	0.012469	0.0688326	0.013839	0.057832	0.015535	0.046427	0.882993	25200	0.0800065	0.0387184	1.18319	5.18741	0.0723145	0.0270169	0.176519	0.0326348	0.155073	0.0397369	0.131952	0.882993	25200	0.120353
HC227	Xcc	HC227_Xcc_bin.143	99.8528	77.8029	87.4595	0.14745	2805757	1	2784	0.212453	0.0190839	0.0703418	3.39011	0.212	0.175	0.249213	0.181575	0.244	0.189	0.23735	0.993675	146070	0.0661305	0.0350476	2.28665	10.8605	0.055698	0.0304082	0.164616	0.03335	0.136729	0.037051	0.10953	0.983064	33930	0.0994113	0.0464075	1.45136	7.23353	0.0909715	0.0358916	0.21278	0.0432104	0.185014	0.0515023	0.157422	0.983064	33930	0.163613
HC227	Xcc	HC227_Xcc_bin.144	99.5079	83.5608	90.8398	0.494575	3696684	1	3556	0.318906	0.0148888	-0.968931	7.06956	0.32	0.2885	0.345	0.294	0.341	0.301	0.336	0.942121	181503	0.0323444	0.0239803	11.5814	174.062	0.028908	0.015543	0.062239	0.017153	0.0535515	0.0192062	0.0460126	0.799248	29890	0.0406349	0.0185073	1.29437	6.40788	0.0375175	0.0143809	0.0858768	0.0174867	0.0741062	0.0211299	0.0636321	0.799248	29890	0.188829
HC227	Xcc	HC227_Xcc_bin.145	99.7674	88.6268	93.8677	0.233097	2050265	1	1996	0.208479	0.0170149	-0.610984	4.21541	0.20975	0.170875	0.237063	0.178375	0.2335	0.187	0.229	0.969342	65341	0.0429562	0.0225029	2.52132	13.0277	0.036995	0.019861	0.103091	0.021891	0.086253	0.024289	0.068349	0.887835	12403	0.0644805	0.0306106	1.31449	6.11362	0.058455	0.0230637	0.142166	0.0282891	0.123554	0.0336752	0.103439	0.887835	12403	0.133981
HC227	Xcc	HC227_Xcc_bin.146	94.8827	85.505	89.9501	5.39325	2185327	1	2158	0.195621	0.0169031	-0.482197	4.04614	0.197	0.155463	0.224038	0.166925	0.2205	0.1745	0.2155	0.988179	84255	0.0655658	0.0345729	4.01371	29.3749	0.058056	0.0311	0.137395	0.0344474	0.115929	0.0384524	0.0979042	0.979173	18915	0.0905532	0.0683189	2.13252	8.12097	0.068785	0.0251893	0.293091	0.0304508	0.244762	0.0367396	0.184142	0.979173	18915	0.237413
HC227	Xcc	HC227_Xcc_bin.147	72.7375	87.0157	79.2386	37.4806	2853847	1	2779	0.167206	0.0158273	0.0429843	4.33762	0.1675	0.134725	0.1965	0.1405	0.1915	0.147178	0.187	0.944362	121771	0.0397815	0.0233201	2.83537	14.2141	0.033496	0.0171383	0.112694	0.019107	0.0814455	0.021508	0.062528	0.886387	24753	0.186299	0.108197	1.41135	5.00179	0.15757	0.0560914	0.484352	0.068272	0.427792	0.0831974	0.341618	0.886387	24753	0.241276
HC227	Xcc	HC227_Xcc_bin.148	90.459	60.4249	72.4528	10.5473	3333916	1	3296	0.2089	0.0184373	-0.473087	3.70975	0.2105	0.1695	0.241	0.176	0.236	0.1845	0.2305	0.990931	197506	0.074095	0.0378383	2.31247	11.4209	0.064234	0.033152	0.175688	0.0367092	0.144084	0.041011	0.118313	0.962489	43071	0.089526	0.0527136	2.11508	9.4168	0.076362	0.0301047	0.239411	0.035792	0.192467	0.0427	0.151359	0.962489	43071	0.218028
HC227	Xcc	HC227_Xcc_bin.149	42.7884	23.6692	30.4786	133.708	2934842	1	2840	0.284557	0.019269	-0.382254	4.15986	0.286	0.2405	0.32	0.25	0.312525	0.2605	0.3065	0.913211	122265	0.105214	0.0573596	2.73461	16.7648	0.093691	0.0390876	0.243127	0.0446406	0.200895	0.0527244	0.166568	0.821192	23871	0.1326	0.0788419	0.804702	3.31252	0.117166	0.024858	0.316623	0.032124	0.280539	0.042794	0.243147	0.821192	23871	0.316207
HC227	Xcc	HC227_Xcc_bin.150	94.4472	64.3955	76.5786	5.87923	2787853	1	2726	0.213607	0.0187692	-0.0509141	4.41674	0.214	0.172563	0.25	0.182	0.2425	0.191	0.2345	0.976242	123753	0.0873752	0.0488897	2.6919	14.082	0.074301	0.0378206	0.219163	0.0419612	0.173802	0.0471034	0.139878	0.923131	23653	0.0464974	0.0309773	1.92535	8.5753	0.037557	0.0124015	0.129219	0.0151656	0.104364	0.018606	0.0858658	0.923131	23653	0.220897
HC227	Xcc	HC227_Xcc_bin.151	99.7447	38.4556	55.5099	0.255964	3216870	1	3033	0.356034	0.0158732	-0.537156	4.83108	0.3565	0.324	0.385	0.33	0.381	0.337	0.3755	0.872952	109278	0.0242736	0.0108939	1.66349	7.66857	0.02203	0.010468	0.0530731	0.011811	0.0446113	0.013522	0.0374929	0.63751	13203	0.0676412	0.0312112	0.675263	3.52417	0.063432	0.019668	0.140802	0.0252893	0.125058	0.0319408	0.110028	0.63751	13042	0.153984
HC227	Xcc	HC227_Xcc_bin.152	97.1741	93.1561	95.1227	2.90808	1797907	1	1753	0.166601	0.0157893	0.144338	3.1837	0.166	0.1379	0.1986	0.1415	0.193	0.1465	0.1875	0.972689	50403	0.0271449	0.0141667	1.72401	6.85545	0.023198	0.0113802	0.0671747	0.0127541	0.0573619	0.0143622	0.045702	0.914815	9730	0.0500104	0.03808	1.88517	6.30076	0.036908	0.0132899	0.162549	0.0166539	0.141485	0.0202598	0.109421	0.914815	9730	0.159766
HC227	Xcc	HC227_Xcc_bin.153	87.8638	87.6515	87.7575	13.8125	3647867	1	3592	0.32077	0.0175694	-1.11011	6.41688	0.3225	0.281388	0.3495	0.291	0.3455	0.3	0.3405	0.983707	223446	0.039067	0.0234065	2.03405	8.15256	0.031687	0.015487	0.10875	0.017138	0.0874685	0.019341	0.068728	0.952082	47278	0.0576782	0.0416812	1.66012	5.84308	0.04343	0.014725	0.173138	0.017665	0.147239	0.0214257	0.118499	0.952082	47278	0.184187
HC227	Xcc	HC227_Xcc_bin.154	90.794	93.4017	92.0794	10.1395	3418521	1	3354	0.200254	0.01427	-0.0796585	3.34474	0.2005	0.172	0.228	0.177	0.223	0.182	0.218	0.959554	188805	0.0556544	0.0227131	2.63334	16.1921	0.050889	0.029069	0.10904	0.031849	0.093827	0.0351914	0.0803736	0.907154	39903	0.0618917	0.028331	1.40998	6.82405	0.056908	0.0226822	0.132472	0.0273169	0.114282	0.0326204	0.0969982	0.907154	39903	0.269197
HC227	Xcc	HC227_Xcc_bin.155	94.9648	83.4649	88.8443	5.30214	3947180	1	3862	0.198626	0.0177912	-0.570736	3.58213	0.2005	0.1585	0.2285	0.1645	0.224	0.175	0.2195	0.974917	250278	0.0745493	0.0346258	1.61505	7.39175	0.066897	0.031155	0.161358	0.035023	0.139946	0.040027	0.118928	0.934945	50403	0.0732425	0.0378569	1.63228	7.27418	0.065157	0.0247101	0.175573	0.030071	0.146626	0.036077	0.119912	0.934945	50403	0.19727
HC227	Xcc	HC227_Xcc_bin.156	98.6581	56.2833	71.6762	1.36014	2716611	1	2687	0.190989	0.0162631	0.0484879	3.91401	0.191	0.1575	0.2225	0.164	0.217	0.171	0.2105	0.988436	129795	0.0525048	0.0237036	2.31339	13.5969	0.047201	0.024659	0.109221	0.027274	0.094957	0.030547	0.0804622	0.977535	28920	0.094061	0.0500726	1.37814	5.35406	0.081754	0.0307099	0.229444	0.0371858	0.198089	0.0448039	0.16236	0.977535	28920	0.240982
HC227	Xcc	HC227_Xcc_bin.157	99.6897	91.9794	95.6794	0.311314	6492073	1	6337	0.338734	0.0183437	-1.54906	9.81819	0.3405	0.2985	0.368	0.3085	0.364	0.318	0.3585	0.971969	652653	0.0263652	0.0191293	5.2079	49.5428	0.021269	0.0113123	0.0747715	0.012441	0.060435	0.01388	0.043128	0.906816	125751	0.0349607	0.0226023	2.51437	11.8564	0.029218	0.011328	0.104557	0.0134195	0.078315	0.016071	0.058669	0.906816	125751	0.126957
HC227	Xcc	HC227_Xcc_bin.158	95.142	93.8541	94.4937	5.10602	4333004	1	4283	0.296844	0.022302	-1.54546	8.23454	0.3	0.243025	0.3315	0.2595	0.3255	0.2715	0.32	0.993616	334971	0.0821567	0.0818966	4.50567	27.6445	0.059949	0.029119	0.359079	0.032319	0.192559	0.03657	0.130251	0.973235	75855	0.0700919	0.0431342	3.58095	25.5364	0.06089	0.0244204	0.172245	0.0288907	0.141546	0.0344234	0.112153	0.973235	75855	0.166698
HC227	Xcc	HC227_Xcc_bin.159	28.8294	12.9003	17.8246	246.868	2711499	1	2616	0.298257	0.020684	-0.686654	4.28786	0.2995	0.2475	0.334	0.261	0.329	0.273116	0.322	0.933837	106491	0.0896046	0.0592	3.31908	18.8444	0.075998	0.0314552	0.246447	0.036437	0.18611	0.043069	0.143145	0.798679	18915	0.137316	0.0711154	0.981197	4.2874	0.12456	0.0353612	0.310154	0.0460047	0.275275	0.058927	0.234541	0.798679	18915	0.309061
HC227	Xcc	HC227_Xcc_bin.160	44.5644	81.108	57.5231	124.394	11317313	1	10880	0.262665	0.0229584	-1.03795	4.87673	0.266	0.2045	0.2985	0.219	0.2935	0.2335	0.288	0.896469	1646205	0.131332	0.0788568	2.18671	9.43123	0.108337	0.049584	0.355554	0.055709	0.289556	0.063854	0.227939	0.771105	283881	0.0532706	0.0361255	2.6997	15.2943	0.045476	0.013811	0.146696	0.016726	0.115966	0.020773	0.091294	0.771105	283881	0.22087
HC227	Xcc	HC227_Xcc_bin.161	83.8272	67.4036	74.7236	19.293	4252247	1	4140	0.346108	0.0162935	-0.436268	4.71161	0.347	0.312	0.376262	0.319	0.3715	0.3255	0.366	0.95305	266815	0.0197664	0.00898589	2.57397	19.1136	0.017897	0.008854	0.040252	0.009858	0.035394	0.011156	0.0305216	0.865867	49770	0.0349636	0.0184198	1.63528	7.06469	0.0306875	0.0119517	0.0844542	0.0142959	0.0722191	0.017184	0.0586151	0.865867	49456	0.113965
HC227	Xcc	HC227_Xcc_bin.162	99.8699	95.8976	97.8434	0.130318	2132185	1	2078	0.247978	0.023329	-0.637482	4.05689	0.25	0.1945	0.288	0.207	0.282	0.2185	0.275	0.967452	69378	0.0904498	0.0456133	1.8983	8.60514	0.0779995	0.039335	0.212129	0.0437799	0.17959	0.0491847	0.14829	0.906425	13366	0.0586096	0.0392956	2.89373	15.1443	0.049565	0.0180089	0.170498	0.0220102	0.129769	0.027107	0.095816	0.906425	13366	0.158178
HC227	Xcc	HC227_Xcc_bin.163	95.4023	92.2661	93.808	4.81927	1934012	1	1906	0.197598	0.0170651	0.397052	5.44006	0.198	0.163	0.229187	0.1705	0.2225	0.1765	0.217	0.994864	64980	0.0626854	0.0466604	3.72478	22.5731	0.049146	0.0252034	0.189085	0.0278059	0.147113	0.0311119	0.104339	0.985752	13695	0.0602323	0.0455242	1.89866	6.69099	0.045212	0.0150063	0.196055	0.0189749	0.167976	0.0233144	0.124542	0.985752	13695	0.200888
HC227	Xcc	HC227_Xcc_bin.164	97.4786	95.6625	96.562	2.58661	6540244	1	6443	0.230794	0.0183233	-0.628193	3.7704	0.233	0.1875	0.261	0.196	0.257	0.2071	0.252	0.984059	731445	0.113997	0.0533871	2.30106	10.9799	0.099039	0.0576931	0.261016	0.062396	0.21937	0.06841	0.178406	0.955853	159895	0.0438247	0.0485008	6.70493	69.0713	0.031989	0.0128214	0.166746	0.015062	0.117716	0.017903	0.072861	0.955853	159895	0.151628
HC227	Xcc	HC227_Xcc_bin.165	38.0672	11.9024	18.1347	162.693	1206518	1	1153	0.232822	0.0179357	-0.424481	3.51963	0.2345	0.193851	0.2641	0.1995	0.259	0.2096	0.2535	0.828276	17766	0.18965	0.0717237	0.569873	3.62482	0.180788	0.083739	0.352491	0.0955415	0.319829	0.109365	0.284262	0.762062	3655	0.138292	0.0936582	1.29978	4.51919	0.107203	0.0238878	0.379065	0.0393707	0.331186	0.0508782	0.275774	0.762062	3655	0.295888
HC227	Xcc	HC227_Xcc_bin.166	78.5396	80.5368	79.5257	27.3244	6067810	1	5946	0.330456	0.0207723	-1.12315	6.71701	0.332	0.284	0.365	0.2945	0.3595	0.3055	0.354	0.976714	585903	0.0306966	0.0263791	7.31633	75.828	0.025554	0.011966	0.0779003	0.013404	0.056612	0.01532	0.045935	0.91887	116886	0.0397901	0.0219175	1.30404	5.18118	0.034168	0.012299	0.095177	0.0146045	0.0836028	0.017747	0.070651	0.91887	116886	0.111158
HC227	Xcc	HC227_Xcc_bin.167	69.7422	34.0947	45.7995	43.3852	1778005	1	1760	0.325364	0.0164044	-1.05896	6.20821	0.327	0.286475	0.352013	0.296475	0.3485	0.306	0.34355	0.991233	57291	0.0358423	0.0195235	2.14885	9.29336	0.031127	0.0145725	0.095453	0.0164	0.0770765	0.018663	0.056613	0.983778	13041	0.0402827	0.0286761	2.21149	10.0164	0.032846	0.009523	0.122432	0.012163	0.095504	0.015292	0.071729	0.983778	13041	0.175844
HC227	Xcc	HC227_Xcc_bin.168	67.4139	33.6912	44.9286	48.3374	1817645	1	1776	0.321482	0.0161311	-0.96998	5.62188	0.3235	0.281375	0.3485	0.293	0.3445	0.30275	0.3395	0.943827	51360	0.041461	0.0241033	2.7557	17.1717	0.0357965	0.015711	0.0945682	0.017659	0.0813631	0.0200839	0.0688636	0.878719	10585	0.0463017	0.0319448	1.28471	4.48333	0.036719	0.0097368	0.129531	0.0124134	0.114307	0.0156296	0.0934248	0.878719	10585	0.195633
HC227	Xcc	HC227_Xcc_bin.169	77.6054	18.2756	29.5843	28.857	1145406	1	1128	0.22942	0.0131578	-0.555186	4.10301	0.23	0.2015	0.253325	0.207175	0.249	0.2125	0.24515	0.990192	23436	0.150523	0.0528564	0.801285	4.18692	0.139556	0.0793004	0.277912	0.0870273	0.253469	0.096552	0.223577	0.966703	5151	0.0977081	0.0735132	1.76522	6.36531	0.07463	0.0197438	0.302113	0.0279365	0.253652	0.035116	0.210916	0.966703	5151	0.28766
HC227	Xcc	HC227_Xcc_bin.170	60.3022	27.8567	38.1089	65.8315	1782568	1	1764	0.229811	0.0141368	-0.906944	5.53806	0.23125	0.199	0.2535	0.205075	0.2495	0.212	0.246	0.993567	57630	0.147886	0.0457652	0.989293	5.82394	0.140386	0.0834567	0.257679	0.0909363	0.232319	0.100118	0.206577	0.985938	13041	0.0953981	0.0477921	1.11789	4.75553	0.08533	0.030149	0.216862	0.037491	0.190803	0.045978	0.161492	0.985938	13041	0.284265
HC227	Xcc	HC227_Xcc_bin.171	75.8922	88.7806	81.832	31.7659	5651171	1	5496	0.196192	0.0175382	-0.138967	3.24314	0.1965	0.1605	0.228	0.1665	0.224	0.1735	0.2185	0.957535	479710	0.0628068	0.0289922	1.86836	9.26353	0.055824	0.028271	0.138827	0.031193	0.118075	0.035038	0.099059	0.890718	92235	0.0901938	0.061905	2.07021	8.65138	0.072732	0.0246647	0.26982	0.0298204	0.221035	0.036372	0.166003	0.890718	92235	0.224473
HC227	Xcc	HC227_Xcc_bin.172	99.3429	94.5085	96.8655	0.661412	3561743	1	3498	0.318128	0.018052	-1.06622	6.65153	0.3195	0.277	0.3485	0.2875	0.344	0.297	0.3385	0.978807	213531	0.0508184	0.0339569	4.06233	26.3621	0.042389	0.0214293	0.131375	0.0238415	0.100107	0.026873	0.079235	0.95317	44253	0.0465323	0.0265964	1.90294	8.2466	0.040082	0.0152376	0.121259	0.0182734	0.100442	0.022068	0.0787596	0.95317	44253	0.157605
HC227	Xcc	HC227_Xcc_bin.173	94.697	75.3872	83.946	5.59999	2562748	1	2521	0.290894	0.0185371	-0.799946	5.39207	0.293	0.25	0.3225	0.2595	0.3175	0.2685	0.311	0.969009	109278	0.0575882	0.0322973	2.51466	12.961	0.048636	0.0243139	0.144758	0.0270439	0.11766	0.030451	0.0942943	0.956313	23871	0.0793586	0.0417632	1.56317	6.59524	0.069383	0.0271937	0.192473	0.0327965	0.166346	0.039231	0.134074	0.956313	23871	0.235787
HC227	Xcc	HC227_Xcc_bin.174	99.3093	51.2077	67.5725	0.695514	4302383	1	3941	0.370329	0.0134906	-0.326834	3.28428	0.371	0.341	0.395	0.347	0.391	0.3525	0.3865	0.735854	122760	0.01483	0.00577434	1.6813	8.67881	0.013695	0.007355	0.029285	0.008143	0.0254561	0.009118	0.021861	0.441605	9870	0.049434	0.0350006	4.6854	33.7696	0.043541	0.015283	0.102835	0.0188753	0.0875969	0.0234156	0.0751786	0.441605	8918	0.116725
HC227	Xcc	HC227_Xcc_bin.175	82.8677	78.9056	80.8381	20.6742	4827418	1	4702	0.206112	0.0177363	0.0464377	4.0371	0.207	0.1705	0.2395	0.177	0.2345	0.183534	0.228	0.932829	340725	0.0946013	0.0428707	1.67942	7.60109	0.084601	0.0417643	0.204148	0.046539	0.175567	0.052715	0.149492	0.8614	66795	0.180405	0.0939487	1.15271	4.68186	0.161026	0.055114	0.422129	0.0666471	0.364317	0.080959	0.305538	0.8614	66795	0.273607
HC227	Xcc	HC227_Xcc_bin.176	97.0345	31.6233	47.701	3.0561	1636602	1	1590	0.336836	0.0190481	-1.04719	5.30015	0.339	0.290225	0.3665	0.301725	0.363	0.313	0.358	0.955094	38503	0.0353036	0.0237311	2.88396	14.1596	0.029076	0.0129093	0.106092	0.014567	0.0760683	0.0167792	0.0580436	0.871878	7021	0.0726018	0.0350302	0.871979	4.10878	0.066755	0.021278	0.157062	0.027941	0.139393	0.035266	0.120059	0.871878	7021	0.183414
HC227	Xcc	HC227_Xcc_bin.177	42.1956	87.4225	56.9187	136.991	4848673	1	4640	0.180259	0.0141728	0.0720908	3.50154	0.18	0.1525	0.2085	0.157	0.2035	0.162	0.198	0.882682	289180	0.0571193	0.0237794	1.04465	5.86434	0.054827	0.0225485	0.109527	0.025346	0.0982211	0.029243	0.0871	0.755014	47586	0.271653	0.151745	0.0613803	1.76452	0.286549	0.049108	0.533657	0.0602403	0.503312	0.07549	0.46723	0.755014	47586	0.318858
HC227	Xcc	HC227_Xcc_bin.178	98.3052	88.791	93.3062	1.72406	2757316	1	2653	0.203493	0.017759	-0.168674	3.22049	0.2045	0.167	0.237	0.1733	0.231	0.18	0.2255	0.928954	97461	0.0489972	0.0252622	4.36903	36.4994	0.043685	0.023573	0.102336	0.026034	0.086049	0.029014	0.072652	0.778575	15576	0.0334091	0.0278617	3.91552	22.3431	0.026649	0.0107209	0.119296	0.0130113	0.080462	0.015506	0.050648	0.778575	15576	0.185948
HC227	Xcc	HC227_Xcc_bin.179	98.7403	93.4789	96.0376	1.27575	3214631	1	3153	0.290325	0.0214927	-1.13005	5.69535	0.293	0.237	0.3245	0.2508	0.3195	0.265	0.3135	0.969885	167331	0.0666755	0.0466004	3.19468	17.7626	0.052959	0.0256893	0.203381	0.0286415	0.15293	0.03247	0.112916	0.928806	35245	0.0732765	0.0367861	1.64185	8.48139	0.065572	0.025723	0.164483	0.0307086	0.142007	0.0366624	0.11972	0.928806	35245	0.209358
HC227	Xcc	HC227_Xcc_bin.180	55.4175	3.57199	6.7114	80.4485	526823	1	509	0.332669	0.0187549	-0.449068	3.89109	0.334	0.2897	0.366	0.3022	0.3618	0.3089	0.3537	0.926677	3655	0.0417563	0.0169333	0.466823	3.88793	0.039844	0.0134172	0.0799942	0.0187767	0.0724313	0.0229068	0.0637928	0.818692	703	0.102606	0.05143	0.139024	2.77531	0.10202	0	0.203476	0	0.18695	0.0397808	0.168704	0.818692	703	0.216441
HC227	Xcc	HC227_Xcc_bin.181	91.2388	78.7445	84.5325	9.60245	5229810	1	5085	0.321879	0.0150299	-0.636101	4.91624	0.323	0.2885	0.348989	0.296	0.3445	0.3035	0.3395	0.949156	411778	0.0287981	0.0141156	2.73183	15.0568	0.025306	0.013704	0.063489	0.0150368	0.0530632	0.016755	0.04414	0.889259	78606	0.0500701	0.0277598	1.73747	7.27996	0.043277	0.016816	0.126558	0.019998	0.105877	0.0238195	0.0852555	0.889259	78606	0.159966
HC227	Xcc	HC227_Xcc_bin.182	53.6868	54.4418	54.0617	86.2654	4932232	1	4841	0.223508	0.0142337	-0.647732	4.63101	0.2245	0.1925	0.248	0.199495	0.245	0.206	0.2405	0.978689	405450	0.13675	0.044695	1.36326	7.16987	0.128436	0.075301	0.244235	0.0819455	0.219764	0.090211	0.194431	0.949869	85078	0.105345	0.0514903	1.46004	6.55844	0.0958735	0.0358718	0.240922	0.0432068	0.20216	0.052213	0.168395	0.949869	85078	0.290329
HC227	Xcc	HC227_Xcc_bin.183	71.2553	93.5473	80.8936	40.3405	8712796	1	8502	0.240328	0.0191921	-0.413839	4.51578	0.2415	0.197	0.275238	0.207	0.2695	0.2175	0.2625	0.943305	1191196	0.161003	0.0705679	1.43516	6.15686	0.146106	0.073386	0.341722	0.0800388	0.298176	0.089029	0.252959	0.895241	252405	0.144747	0.10772	0.896994	2.55739	0.095381	0.0305711	0.377322	0.036031	0.349446	0.0433354	0.315486	0.895241	252405	0.294203
HC227	Xcc	HC227_Xcc_bin.184	96.2265	88.1234	91.9968	3.92147	7022398	1	6897	0.272243	0.0251702	-0.54426	4.13756	0.274	0.2137	0.3155	0.228	0.309018	0.241	0.3015	0.977302	814726	0.112791	0.0787175	2.47306	10.7962	0.087318	0.0403601	0.353094	0.04515	0.274166	0.0514105	0.202387	0.940775	167331	0.0568184	0.05326	3.13339	13.5618	0.041519	0.0164987	0.24949	0.019353	0.192887	0.023031	0.093094	0.940775	167331	0.236381
HC227	Xcc	HC227_Xcc_bin.185	93.3099	84.4112	88.6378	7.16977	1724368	1	1613	0.143555	0.0134418	0.0898519	2.86023	0.143	0.118	0.1695	0.122	0.166	0.1265	0.1615	0.818172	26335	0.0191817	0.00960535	1.29704	4.95395	0.016536	0.0077017	0.0436511	0.008751	0.0389213	0.0099694	0.0330112	0.534831	2628	0.0638656	0.0600046	2.27093	8.39405	0.042672	0	0.248912	0.0170501	0.210072	0.0222492	0.154837	0.534831	2628	0.149245
HC227	Xcc	HC227_Xcc_bin.186	68.0981	89.6833	77.4142	46.8469	4637010	1	4358	0.162294	0.0144745	0.10797	3.03684	0.162	0.134463	0.191	0.139	0.1865	0.144	0.181	0.836737	220116	0.0352205	0.0216817	3.30819	22.906	0.030324	0.012832	0.0849875	0.014406	0.070902	0.016582	0.057947	0.663244	29890	0.146298	0.0858798	0.863861	3.0647	0.122734	0.0376716	0.347374	0.045789	0.314778	0.0560587	0.275954	0.663244	29890	0.243454
HC227	Xcc	HC227_Xcc_bin.187	97.6771	87.0135	92.0374	2.37816	3840078	0.99974	3668	0.168574	0.012532	0.087092	2.96278	0.1685	0.1445	0.194	0.1485	0.1895	0.1525	0.1845	0.893833	171991	0.0315704	0.0132597	1.56575	6.53598	0.028314	0.0154647	0.0672148	0.0169935	0.0585515	0.018875	0.049086	0.734191	24531	0.107451	0.057351	1.75322	7.55701	0.094106	0.0371848	0.263888	0.045038	0.225708	0.054031	0.179443	0.734191	24531	0.236926
HC227	Xcc	HC227_Xcc_bin.188	52.2815	74.1073	61.3099	91.2721	3609921	1	3299	0.159059	0.0129696	0.175647	3.49055	0.159	0.134	0.185	0.138	0.1805	0.1425	0.1755	0.697719	84255	0.0344896	0.0151059	1.25789	5.17348	0.031055	0.0151144	0.0730493	0.016863	0.0646223	0.0191764	0.0551936	0.42364	7260	0.212957	0.117142	0.86187	3.49516	0.187058	0.0523995	0.48737	0.071668	0.441313	0.0885325	0.380698	0.42364	7260	0.238646
HC227	Xcc	HC227_Xcc_bin.189	98.6648	79.1588	87.842	1.35332	2819702	1	2727	0.292137	0.0219736	-0.847487	4.29919	0.295	0.2395	0.3265	0.252	0.322	0.2635	0.317	0.936887	108345	0.0909679	0.0627982	2.5568	13.6969	0.072278	0.0291516	0.244078	0.032875	0.205266	0.0380854	0.167158	0.839581	18915	0.0681265	0.0378575	1.76803	7.57723	0.059025	0.0220282	0.173982	0.0271521	0.143543	0.0328914	0.114872	0.839581	18915	0.232959
HC227	Xcc	HC227_Xcc_bin.190	50.6613	6.25465	11.1346	97.3892	1009083	1	940	0.34086	0.0155615	-0.400556	3.9545	0.3415	0.305475	0.3695	0.315475	0.366	0.32195	0.359	0.792124	8778	0.0331663	0.0133865	0.770716	4.513	0.031084	0.013695	0.0638027	0.0164341	0.0576126	0.0189355	0.0508625	0.538177	903	0.0855806	0.0456691	0.413352	2.88547	0.080575	0	0.18038	0.0214525	0.168514	0.033042	0.149282	0.538177	903	0.184138
HC227	Xcc	HC227_Xcc_bin.191	82.2236	48.9924	61.4	21.6196	2992224	0.999666	2820	0.347048	0.0130562	-0.606445	4.41179	0.3475	0.319	0.369762	0.3245	0.3665	0.3305	0.363	0.836891	90100	0.0225759	0.00819587	1.17186	5.88781	0.0211095	0.0112715	0.0422105	0.01246	0.037637	0.013946	0.0331271	0.660025	12246	0.0584877	0.0292447	1.18482	5.32344	0.0529235	0.0178195	0.131707	0.022503	0.114879	0.028138	0.09671	0.660025	12246	0.1442
HC227	Xcc	HC227_Xcc_bin.192	81.4407	78.0083	79.6875	22.7887	7831575	1	7405	0.354225	0.0143453	-0.351434	3.5478	0.355	0.3245	0.3805	0.33	0.3765	0.335915	0.3715	0.846389	633375	0.0208907	0.00843985	1.95848	11.4489	0.019298	0.00997335	0.0412097	0.011045	0.035918	0.012417	0.03094	0.676551	86736	0.0495708	0.0274705	1.55855	6.84007	0.04311	0.01524	0.119676	0.0183402	0.102469	0.022259	0.0855315	0.676551	86321	0.124185
HC227	Xcc	HC227_Xcc_bin.193	98.5341	83.9672	90.6693	1.48768	2807748	1	2573	0.362545	0.0171453	-0.0721872	2.83158	0.363	0.33	0.3955	0.3345	0.3905	0.34	0.3845	0.715461	53628	0.0157387	0.00941563	2.02191	9.0242	0.0131585	0.00563667	0.0413737	0.006391	0.0338923	0.007347	0.0270889	0.435698	4465	0.0385371	0.0172736	0.643208	3.9418	0.03633	0.0103012	0.0777712	0.0153132	0.069808	0.0192106	0.061603	0.435698	4372	0.0932964
HC227	Xcc	HC227_Xcc_bin.194	79.2445	89.2549	83.9523	26.1917	8012615	0.999626	7575	0.312079	0.0131282	-0.719098	6.04732	0.313	0.283575	0.3355	0.2905	0.3315	0.2965	0.3275	0.826415	713415	0.044049	0.0252533	3.80141	27.766	0.037035	0.02072	0.106477	0.022606	0.087452	0.025007	0.0708936	0.740824	131328	0.0623339	0.0419139	2.30204	9.63539	0.050288	0.020259	0.18733	0.023826	0.158749	0.028409	0.11347	0.740824	131328	0.225108
HC227	Xcc	HC227_Xcc_bin.195	90.8175	82.8041	86.6259	10.111	5977384	1	5570	0.33237	0.0153272	-1.10121	7.41874	0.3335	0.2985	0.358	0.3065	0.3545	0.3145	0.35	0.777402	302253	0.0262076	0.0167493	5.09296	43.3316	0.022304	0.01169	0.0631431	0.012917	0.050007	0.014482	0.040294	0.562378	37675	0.042469	0.0296246	2.21468	9.19702	0.03383	0.0126847	0.129894	0.015213	0.108328	0.0183364	0.080069	0.562378	37675	0.154298
HC227	Xcc	HC227_Xcc_bin.196	44.4518	2.46264	4.66674	124.963	519371	1	475	0.334921	0.0171201	-0.806381	5.22083	0.3365	0.297	0.3665	0.30525	0.36115	0.3145	0.35404	0.681771	1711	0.0362252	0.0139069	0.10412	3.85616	0.035264	0	0.0669115	0.0175145	0.0601305	0.021547	0.053701	0.356776	105	0.106242	0.0644239	0.0347444	2.38277	0.110861	0	0.225046	0	0.218341	0	0.191575	0.356776	105	0.204929
HC227	Xcc	HC227_Xcc_bin.197	97.7008	78.6605	87.1528	2.35334	3297326	1	3102	0.192172	0.015186	-0.190062	3.48483	0.1925	0.160556	0.2205	0.1665	0.2155	0.173	0.211	0.841579	107416	0.0463288	0.019374	1.43681	6.82571	0.042708	0.020528	0.0951786	0.0231228	0.0823265	0.026403	0.0705005	0.611731	12561	0.0888186	0.0440184	1.22269	5.69517	0.080227	0.028535	0.196932	0.035568	0.172561	0.042975	0.146347	0.611731	12561	0.215893
HC227	Xcc	HC227_Xcc_bin.198	96.1431	86.7803	91.2221	4.01158	4209583	1	3968	0.280008	0.0207608	-0.870828	4.61945	0.2825	0.230337	0.315	0.2415	0.31	0.25303	0.3035	0.855211	176715	0.0728736	0.0458152	2.51934	11.4905	0.059199	0.028985	0.207711	0.032338	0.164766	0.0366304	0.12566	0.623413	21115	0.0306679	0.0226407	3.20584	17.4047	0.02492	0.0092637	0.0989943	0.0111757	0.0681048	0.013573	0.0517454	0.623413	21115	0.16824
HC227	Xcc	HC227_Xcc_bin.199	96.5154	80.3373	87.6864	3.61038	5991496	1	5504	0.343476	0.0166951	-1.18694	9.19532	0.3445	0.3085	0.372	0.3165	0.368	0.3235	0.363	0.717114	240471	0.0238589	0.0142325	8.34588	114.321	0.021245	0.011168	0.0482498	0.012362	0.041915	0.013876	0.035808	0.429736	20910	0.0454803	0.0224606	1.46546	7.25899	0.041331	0.0149292	0.0991657	0.0182343	0.0860619	0.022395	0.0732391	0.429736	20910	0.130527
HC227	Xcc	HC227_Xcc_bin.200	97.928	68.3889	80.5353	2.11584	3953040	1	3580	0.349541	0.0159373	-1.33013	9.54441	0.351	0.3145	0.3765	0.324	0.372	0.3315	0.3675	0.643219	81810	0.021098	0.00881895	1.89221	10.2969	0.019406	0.00985767	0.0428112	0.0110195	0.0367936	0.012464	0.03136	0.338346	5356	0.0531442	0.0288646	1.46344	6.49671	0.047236	0.014374	0.129769	0.0200635	0.108943	0.0252445	0.0895925	0.338346	5356	0.132897
HC227	Xcc	HC227_Xcc_bin.201	97.4795	82.1562	89.1643	2.58569	5311383	0.999812	4884	0.335372	0.0154278	-1.00805	6.54172	0.3365	0.301501	0.3615	0.3095	0.3575	0.3175	0.353	0.753485	211575	0.0257713	0.0114704	2.6671	19.1339	0.023458	0.012003	0.0521176	0.013289	0.0456383	0.014908	0.039064	0.475746	20706	0.0281699	0.0144385	1.44493	6.93973	0.0252355	0.00904088	0.0643413	0.0111073	0.0555633	0.0134915	0.046774	0.475746	20706	0.114636
HC227	Xcc	HC227_Xcc_bin.202	80.065	58.0212	67.2836	24.8985	6031263	1	5455	0.32147	0.0129844	-0.626228	5.0719	0.3225	0.2925	0.344325	0.298997	0.3405	0.305556	0.3365	0.659065	196878	0.0305125	0.0133061	2.02067	9.85569	0.0275715	0.0146929	0.066588	0.0161579	0.054766	0.018046	0.0457933	0.35432	14535	0.0613039	0.0313474	1.14106	4.95871	0.055072	0.0182572	0.139418	0.0230486	0.122307	0.0283792	0.103602	0.35432	14535	0.189736
HC227	Xcc	HC227_Xcc_bin.203	61.7574	79.3435	69.4546	61.9239	4151804	0.999759	3529	0.14348	0.0132314	-0.00477197	3.20458	0.1435	0.1165	0.1684	0.121	0.1645	0.1265	0.1605	0.37133	29890	0.025592	0.0126337	1.3566	5.54633	0.0224375	0.010244	0.058244	0.0115774	0.050607	0.0132737	0.0427676	0.141508	1081	0.127091	0.0706174	0.8733	3.82553	0.112237	0	0.295698	0.039271	0.266637	0.057759	0.229116	0.141508	1081	0.231271
HC227	Xcc	HC227_Xcc_bin.204	56.9757	86.2739	68.6287	75.5134	5096841	1	4586	0.314735	0.0166562	-1.14044	8.02308	0.316	0.2795	0.343962	0.288096	0.338792	0.2965	0.332828	0.633291	129286	0.0589735	0.0344399	3.39958	24.5346	0.054227	0.021391	0.131222	0.0238362	0.107398	0.0272415	0.090875	0.328293	8385	0.0944455	0.0579111	0.725002	3.13965	0.085447	0.0175024	0.229479	0.0231306	0.200467	0.029194	0.172338	0.328293	8385	0.268661
HC227	Xcc	HC227_Xcc_bin.205	98.0792	76.7113	86.0892	1.95843	2641655	0.999621	2338	0.365508	0.014974	-0.995973	7.13331	0.3665	0.3355	0.3905	0.341925	0.3875	0.347475	0.3835	0.552785	25878	0.0144011	0.00594915	1.25584	5.96575	0.0133315	0.00636492	0.0295534	0.00725	0.0256652	0.0083517	0.0218443	0.190562	903	0.052931	0.0447145	3.23966	15.2452	0.043936	0	0.224784	0.0127042	0.102689	0.0220108	0.0787284	0.190562	477	0.117249
HC227	Xcc	HC227_Xcc_bin.206	61.4164	80.4029	69.6387	62.8229	6794391	1	6113	0.283389	0.0169748	-0.218376	4.65925	0.284	0.248	0.316	0.2555	0.3095	0.263131	0.30303	0.633123	240471	0.096344	0.0475601	1.60337	7.13854	0.085903	0.0381297	0.221252	0.042662	0.186615	0.048828	0.156056	0.349913	17205	0.104991	0.0635698	1.12497	5.18711	0.094761	0.0223971	0.250517	0.028139	0.21971	0.0359154	0.188529	0.349913	17205	0.301547
HC227	Xcc	HC227_Xcc_bin.207	75.7229	80.1502	77.8736	32.0605	5177891	1	4577	0.18103	0.0131984	0.0920863	3.36871	0.181	0.156	0.2075	0.1595	0.2025	0.1645	0.198	0.540017	100128	0.0435335	0.0193828	1.6786	8.094	0.0394645	0.0194734	0.0921315	0.0216027	0.078532	0.024324	0.0671483	0.256354	6105	0.0928489	0.0697687	1.5807	5.52908	0.068877	0.0185946	0.286544	0.025549	0.247114	0.0318642	0.192718	0.256354	6105	0.26695
HC227	Xcc	HC227_Xcc_bin.208	96.9635	89.5445	93.1065	3.13162	4375823	1	4072	0.210116	0.0136755	-0.0824403	3.44679	0.2105	0.1825	0.2355	0.1875	0.2315	0.1925	0.227	0.791268	161596	0.0797595	0.0277344	1.3194	6.10633	0.0741645	0.0430129	0.150952	0.0468257	0.133444	0.051627	0.115654	0.51466	15225	0.0651022	0.0322097	1.4715	6.49024	0.058822	0.0220434	0.153497	0.0271548	0.127834	0.033412	0.103988	0.51466	15225	0.233688
HC227	Xcc	HC227_Xcc_bin.209	74.5411	60.6007	66.8519	34.1541	5004805	1	4312	0.335665	0.0110919	-0.31541	6.05675	0.3355	0.3135	0.357016	0.3175	0.35303	0.322	0.3495	0.411702	52326	0.0215714	0.00768835	1.06322	5.35088	0.0202245	0.010816	0.0406419	0.0120652	0.0361775	0.0135595	0.0314595	0.135828	1596	0.0434711	0.0258399	1.45336	5.9242	0.0380385	0	0.112903	0.014166	0.0997835	0.01955	0.077472	0.135828	1596	0.14866
HC227	Xcc	HC227_Xcc_bin.210	91.2811	62.3879	74.1182	9.55171	2873571	0.998956	2482	0.326613	0.0157597	-0.731648	5.2637	0.3275	0.2925	0.354	0.3005	0.35	0.3075	0.3455	0.443082	19701	0.0325573	0.0149938	1.46479	6.53355	0.029469	0.0136135	0.0727415	0.015549	0.063008	0.017854	0.052094	0.169754	780	0.0376579	0.0270457	1.56434	6.08955	0.02978	0	0.114537	0.00738245	0.0910413	0.0132957	0.0716274	0.169754	780	0.163781
HC227	Xcc	HC227_Xcc_bin.211	87.5221	54.4717	67.1505	14.2569	5850429	1	5054	0.366991	0.0130731	-0.230403	3.3302	0.3675	0.34	0.3915	0.3455	0.387798	0.35	0.3835	0.411038	70125	0.0158399	0.00570581	1.01514	5.11738	0.014869	0.007771	0.029589	0.0086582	0.0265592	0.009738	0.023329	0.122148	1653	0.052442	0.0262626	0.876752	4.88411	0.049068	0	0.112269	0.0176214	0.100358	0.0246348	0.086442	0.122148	1488	0.125229
HC227	Xcc	HC227_Xcc_bin.212	99.8291	47.5924	64.456	0.171239	1560377	0.999359	1236	0.338885	0.0170551	-0.512436	4.09377	0.33934	0.302941	0.3695	0.311	0.365	0.317336	0.3605	0.0894194	276	0.0272034	0.0159438	0.450381	2.83442	0.0245355	0	0.0595071	0	0.0562508	0.010766	0.050215	-1	1	1	NA	NA	NA	1	1	1	1	1	1	1	-1	1	1
HC227	Xcc	HC227_Xcc_bin.213	93.7189	55.4107	69.6445	6.70204	3725358	0.999732	3126	0.224616	0.0181724	0.102871	3.05708	0.2245	0.19	0.26	0.1955	0.2545	0.201	0.2475	0.302625	15400	0.148918	0.0718397	1.19436	4.89842	0.130805	0.0605946	0.330731	0.0681827	0.292575	0.0779287	0.247532	0.0873033	300	0.059918	0.0581661	2.11355	7.13015	0.0413235	0	0.237707	0	0.219682	0.0178423	0.119047	0.0873033	300	0.19523
HC227	Xcc	HC227_Xcc_bin.214	96.7945	12.2298	21.7158	3.31169	1513530	1	1176	0.330587	0.0117843	-0.256737	4.24395	0.3305	0.306023	0.3535	0.311904	0.349495	0.3165	0.345	0.0390722	55	0.0295384	0.0235423	0.970275	3.44523	0.026495	0	0.0839673	0	0.0805082	0	0.0701836	-1	1	1	NA	NA	NA	1	1	1	1	1	1	1	-1	1	1
[truncated: 31 more columns]

## Sheet: Supplementary Table 5
dataset	binning method	Bin.Id	purity	completeness	F1	contamination	bin.size	w1k_GC.bin.part	w1k_GC.ncmp	w1k_GC.avg	w1k_GC.sdev	w1k_GC.skew	w1k_GC.kurt	w1k_GC.med	w1k_GC.p025	w1k_GC.p975	w1k_GC.p050	w1k_GC.p950	w1k_GC.p100	w1k_GC.p900	w5k_f4c.bin.part	w5k_f4c.ncmp	w5k_f4c.avg	w5k_f4c.sdev	w5k_f4c.skew	w5k_f4c.kurt	w5k_f4c.med	w5k_f4c.p025	w5k_f4c.p975	w5k_f4c.p050	w5k_f4c.p950	w5k_f4c.p100	w5k_f4c.p900	w10k_m3c.bin.part	w10k_m3c.ncmp	w10k_m3c.avg	w10k_m3c.sdev	w10k_m3c.skew	w10k_m3c.kurt	w10k_m3c.med	w10k_m3c.p025	w10k_m3c.p975	w10k_m3c.p050	w10k_m3c.p950	w10k_m3c.p100	w10k_m3c.p900	w10k_m4c.bin.part	w10k_m4c.ncmp	w10k_m4c.avg
Bmock12	Mc	Bm12I_mc_bin.10	79.3606	95.4815	86.6779	26.007	8666459	1	17234	0.368186	0.0167493	-0.439474	3.69107	0.3695	0.333	0.3975	0.339	0.393	0.346	0.3885	0.998272	35015896	0.0179003	0.0104695	2.58832	13.0566	0.015143	0.007066	0.047322	0.00791	0.037643	0.009039	0.029414	0.996893	1342341	0.0332008	0.0189998	1.70318	7.90213	0.028824	0.009911	0.0812705	0.011734	0.068834	0.014259	0.057316	0.996893	1231665	0.120511
Bmock12	Mc	Bm12I_mc_bin.11	100	6.5778	12.3437	0	211739	1	421	0.214748	0.0174948	-0.548701	3.34224	0.2165	0.1755	0.244	0.183	0.2405	0.191	0.2365	1	20503	0.0882361	0.0274863	0.665408	4.19384	0.084004	0.044123	0.153014	0.0528008	0.139568	0.0595214	0.124653	1	741	0.0614883	0.0255929	0.469156	2.73885	0.058521	0.0217265	0.116218	0.024184	0.107455	0.029749	0.097198	1	741	0.211019
Bmock12	Mc	Bm12I_mc_bin.12	100	58.58	73.8807	0	2105210	1	4198	0.199378	0.0160357	-0.221433	4.79841	0.2	0.165	0.228	0.1725	0.223	0.1795	0.218	1	2131080	0.0542445	0.0292566	3.07689	16.972	0.046519	0.025932	0.136301	0.02824	0.104909	0.031195	0.0829381	1	83028	0.092092	0.0438303	1.40173	5.8328	0.08291	0.033641	0.208346	0.0393187	0.178546	0.046814	0.149066	1	83028	0.256225
Bmock12	Mc	Bm12I_mc_bin.13	100	82.7538	90.5632	0	4228994	1	8361	0.279291	0.015607	-0.688838	3.91665	0.281	0.243	0.305	0.251	0.3015	0.259	0.2975	1	7728346	0.0790141	0.0339554	2.73277	15.9969	0.070895	0.041494	0.167719	0.045017	0.141451	0.049473	0.116584	0.985152	280875	0.063883	0.0291788	1.44126	6.26561	0.05808	0.024497	0.140296	0.028453	0.120808	0.033621	0.101157	0.985152	280875	0.273727
Bmock12	Mc	Bm12I_mc_bin.14	100	6.77317	12.687	0	218028	1	430	0.217715	0.0162704	-1.0057	4.73525	0.22	0.175	0.242	0.188	0.239775	0.196	0.2355	1	20100	0.0881795	0.0323786	1.00534	4.46821	0.081141	0.041773	0.169267	0.0502179	0.152192	0.0560333	0.132866	1	703	0.054795	0.0314593	1.93427	8.74151	0.047597	0.0160629	0.141065	0.0209492	0.118574	0.0255378	0.0934346	1	703	0.208084
Bmock12	Mc	Bm12I_mc_bin.15	100	41.1368	58.2935	0	1849325	1	3692	0.34752	0.0136719	-0.372914	4.17961	0.348	0.32	0.3725	0.325	0.369	0.3305	0.365	1	1668051	0.0206298	0.00875368	2.57804	16.2348	0.018853	0.010073	0.041953	0.011118	0.035626	0.012445	0.0303	1	65703	0.0236514	0.0122126	1.70271	7.96938	0.020975	0.00820055	0.0556203	0.009571	0.0473568	0.011458	0.0389568	1	65703	0.117104
Bmock12	Mc	Bm12I_mc_bin.16	100	7.60645	14.1375	0	244851	1	484	0.209575	0.0195186	-0.26501	2.70682	0.2105	0.167725	0.243	0.1755	0.2385	0.183	0.234	1	25651	0.0897874	0.0347121	0.909251	4.20607	0.083221	0.038455	0.173665	0.0461975	0.155711	0.053358	0.137159	1	903	0.055659	0.0262971	0.868793	3.53288	0.050185	0.0184417	0.118101	0.0211909	0.106968	0.0261874	0.0907438	1	903	0.223612
Bmock12	Mc	Bm12I_mc_bin.17	100	86.911	92.9972	0	3865137	1	7649	0.27467	0.0183068	-1.03069	6.24761	0.2765	0.2335	0.305	0.2445	0.3005	0.2524	0.295	0.999132	6557631	0.105203	0.0640139	2.72203	13.5466	0.087801	0.042033	0.293424	0.046646	0.221359	0.052791	0.170652	0.98822	239778	0.0523109	0.0279429	1.58859	7.0085	0.045831	0.0172784	0.124389	0.02023	0.106257	0.02428	0.0885049	0.98822	239778	0.255672
Bmock12	Mc	Bm12I_mc_bin.18	100	77.6877	87.443	0	3855501	1	7668	0.320988	0.017186	-1.20659	7.69473	0.3225	0.283	0.3495	0.2925	0.3455	0.3015	0.3405	1	6947128	0.0339525	0.0334096	7.92232	94.03	0.026381	0.013636	0.098786	0.015	0.071668	0.016773	0.052597	0.996588	266085	0.0616269	0.0391128	2.71476	14.424	0.051734	0.020508	0.16869	0.0238762	0.132714	0.028419	0.10415	0.996588	266085	0.172354
Bmock12	Mc	Bm12I_mc_bin.19	100	71.3424	83.2747	0	4995844	1	9936	0.366249	0.0175878	-0.548563	4.02305	0.3675	0.3295	0.397	0.336	0.3925	0.343	0.387	0.99847	11652378	0.017868	0.0105004	3.05276	24.3767	0.014973	0.007017	0.045623	0.007836	0.038403	0.008922	0.030513	0.995233	445096	0.0353764	0.0186335	1.92862	9.8136	0.031591	0.011886	0.0825012	0.01401	0.068938	0.016843	0.057526	0.995233	425503	0.124
Bmock12	Mc	Bm12I_mc_bin.1	100	71.9985	83.7199	0	3051786	1	5865	0.280279	0.017396	-0.284317	3.82282	0.2805	0.244	0.3137	0.252	0.3084	0.2585	0.302	0.970326	2762425	0.0956566	0.0428135	2.28833	12.8419	0.086282	0.044262	0.204646	0.049118	0.173632	0.05536	0.145246	0.862262	76636	0.0645003	0.0279895	1.17435	5.1652	0.059422	0.0249285	0.133655	0.028826	0.117539	0.0340335	0.101307	0.862262	76636	0.220416
Bmock12	Mc	Bm12I_mc_bin.20	100	91.1962	95.3954	0	3951833	1	7839	0.270005	0.0153155	-0.952628	6.5873	0.2715	0.2365	0.296	0.2445	0.292	0.252	0.287	1	7048135	0.123715	0.054761	2.77372	15.2577	0.110823	0.063968	0.268136	0.069581	0.217681	0.076677	0.181104	0.992009	261726	0.0656644	0.0310671	1.61273	7.47057	0.059351	0.0247411	0.14448	0.028769	0.124045	0.0339525	0.104504	0.992009	261726	0.297408
Bmock12	Mc	Bm12I_mc_bin.21	100	12.0227	21.4648	0	387010	1	764	0.21519	0.0180573	-0.713345	4.85889	0.2165	0.176113	0.2455	0.186075	0.2425	0.1935	0.2365	1	63546	0.106657	0.0610681	3.00989	15.2523	0.0904915	0.0479851	0.275259	0.0539943	0.209869	0.0603405	0.166561	1	2211	0.0734752	0.0592666	2.92558	13.7098	0.055962	0.0199545	0.288879	0.0236215	0.177058	0.028913	0.136357	1	2211	0.241481
Bmock12	Mc	Bm12I_mc_bin.2	100	7.81558	14.4981	0	251583	1	496	0.213845	0.0178933	-0.7061	3.63114	0.2165	0.171687	0.243625	0.179	0.239625	0.18825	0.2335	1	26106	0.0863541	0.0320722	1.35807	6.31796	0.079038	0.0426631	0.167595	0.049857	0.148533	0.0558715	0.129072	1	903	0.0522278	0.0262726	1.83907	8.07059	0.046456	0.0194149	0.129406	0.0231583	0.101921	0.0265632	0.0840774	1	903	0.214645
Bmock12	Mc	Bm12I_mc_bin.3	100	12.7456	22.6095	0	410281	1	804	0.215611	0.0174674	-0.592908	3.80843	0.2175	0.177075	0.245463	0.186075	0.240925	0.194	0.237	1	64980	0.0882617	0.0309819	1.20074	5.18267	0.0817275	0.0461253	0.168709	0.0516079	0.150092	0.05728	0.129711	0.96178	2080	0.0450277	0.0180273	0.76692	3.57633	0.042204	0.0165915	0.0867902	0.0203568	0.0789084	0.0245329	0.0700482	0.96178	2080	0.206863
Bmock12	Mc	Bm12I_mc_bin.4	100	39.8381	56.9775	0	1431677	1	2857	0.203181	0.0139519	-0.408307	3.81456	0.204	0.171	0.2285	0.179	0.225	0.186	0.2197	1	997578	0.0541569	0.0299171	4.181	27.57	0.047219	0.027189	0.118531	0.029646	0.09556	0.032686	0.078708	1	39340	0.0874993	0.0431704	1.70713	7.34195	0.0779	0.0327303	0.204562	0.0380738	0.171138	0.0450079	0.140683	1	39340	0.240732
Bmock12	Mc	Bm12I_mc_bin.5	100	19.7372	32.9675	0	979521	1	1935	0.289291	0.0161907	-0.0854536	3.08179	0.2895	0.256675	0.3215	0.2625	0.31515	0.2685	0.3095	1	407253	0.0681296	0.0287034	1.47323	5.90533	0.060723	0.0325673	0.143699	0.036108	0.125496	0.040311	0.107138	1	14365	0.0846988	0.0341143	0.918678	4.22415	0.079637	0.0326506	0.166573	0.0388928	0.149191	0.0460472	0.129947	1	14365	0.224967
Bmock12	Mc	Bm12I_mc_bin.6	77.1776	3.13687	6.0287	29.5712	292774	1	568	0.333098	0.0203962	-0.234022	3.14463	0.334	0.290587	0.3725	0.297	0.365	0.3062	0.358	0.970353	29403	0.0334423	0.0130119	0.93875	4.51711	0.031347	0.0136083	0.0653139	0.0165254	0.05779	0.019442	0.0507818	0.970353	990	0.0546899	0.0225749	0.964669	4.37547	0.05176	0.0177991	0.110602	0.0234587	0.100157	0.0302787	0.083867	0.970353	990	0.227339
Bmock12	Mc	Bm12I_mc_bin.7	100	15.7528	27.218	0	507082	1	1002	0.215153	0.0182471	-0.488303	3.31077	0.21675	0.174	0.246987	0.18205	0.2415	0.1905	0.2365	1	110685	0.0894786	0.0321071	1.49665	7.10956	0.083028	0.0467945	0.170529	0.0518002	0.150588	0.0574624	0.129928	1	3828	0.056063	0.0227698	0.894496	4.02949	0.052576	0.0218342	0.111454	0.0256286	0.099414	0.0303763	0.0869891	1	3828	0.209234
Bmock12	Mc	Bm12I_mc_bin.8	100	6.75483	12.6548	0	345194	1	686	0.281515	0.0156072	-0.573388	3.48308	0.2835	0.247062	0.308	0.2535	0.3035	0.261	0.2995	1	54615	0.0706794	0.0243362	1.03273	4.82247	0.066284	0.0356452	0.132023	0.0402838	0.117684	0.0451624	0.102672	1	2080	0.0558551	0.0208546	0.901703	4.15605	0.052296	0.0238455	0.106523	0.0279151	0.0960286	0.0324123	0.0834755	1	2080	0.261575
Bmock12	Mc	Bm12I_mc_bin.9	100	11.5068	20.6387	0	370402	1	734	0.216732	0.0162087	0.339038	5.53734	0.2175	0.1835	0.243338	0.189825	0.24	0.19565	0.2345	1	60726	0.0832518	0.049805	4.85007	31.2845	0.0738465	0.043496	0.220978	0.048377	0.126434	0.0534105	0.106893	1	2145	0.0459402	0.0192586	1.13334	5.27714	0.043214	0.0172646	0.0947924	0.0209174	0.0809486	0.0248912	0.0695802	1	2145	0.206127
Bmock12	Mcc	Bm12I_mcnc_bin.10	50.0109	95.6135	65.6719	99.9565	13776655	1	27372	0.367399	0.0171193	-0.484503	3.82509	0.3685	0.332	0.3975	0.3375	0.393	0.345	0.388	0.996634	87814378	0.0184753	0.0105575	2.72245	17.3886	0.015668	0.007384	0.047415	0.008262	0.038783	0.009429	0.030624	0.991663	3352755	0.0361771	0.01938	1.73656	8.41143	0.032188	0.011414	0.085051	0.013577	0.0718443	0.016537	0.060011	0.991663	3123750	0.123176
Bmock12	Mcc	Bm12I_mcnc_bin.11	82.7735	3.42431	6.57655	20.8116	297995	1	576	0.33178	0.020215	-0.142946	3.15907	0.3325	0.290687	0.3725	0.296875	0.365	0.305	0.35675	0.959882	28920	0.0325376	0.0127313	0.933453	4.36042	0.0304395	0.0135108	0.0635651	0.0163008	0.0565378	0.0188547	0.0496925	0.936056	946	0.0491953	0.0177917	0.495243	3.36104	0.0476455	0.0171674	0.0895245	0.0223455	0.0815682	0.027383	0.071808	0.936056	946	0.228848
Bmock12	Mcc	Bm12I_mcnc_bin.12	100	7.82363	14.5119	0	251842	1	496	0.209779	0.0193662	-0.290441	2.74247	0.211	0.168625	0.243	0.1755	0.2385	0.183	0.234	1	26106	0.0898706	0.0346021	0.903755	4.19928	0.0833125	0.0386818	0.173319	0.0463145	0.155467	0.053467	0.137078	0.972241	903	0.055659	0.0262971	0.868793	3.53288	0.050185	0.0184417	0.118101	0.0211909	0.106968	0.0261874	0.0907438	0.972241	903	0.223612
Bmock12	Mcc	Bm12I_mcnc_bin.13	100	85.0388	91.9146	0	3781874	1	7488	0.274857	0.0181987	-1.06957	6.42341	0.277	0.2335	0.305	0.244675	0.300325	0.2525	0.295	0.997696	6317235	0.103957	0.0643279	2.77633	13.7306	0.08615	0.041819	0.295658	0.046371	0.222675	0.052408	0.169361	0.988454	232903	0.0515869	0.0275308	1.64501	7.3948	0.045254	0.017155	0.122892	0.0201011	0.104289	0.024098	0.086721	0.988454	232903	0.253902
Bmock12	Mcc	Bm12I_mcnc_bin.14	100	18.6177	31.391	0	599301	1	1185	0.21646	0.0177205	-0.280396	5.43109	0.2175	0.181	0.246	0.187	0.2424	0.196	0.2365	1	154846	0.102744	0.0626013	3.29387	16.7049	0.085698	0.0483806	0.302053	0.053267	0.207649	0.058852	0.157554	0.984687	5356	0.0634737	0.0507746	3.32318	17.5471	0.0495035	0.0187965	0.18837	0.0219312	0.154277	0.0263895	0.11346	0.984687	5356	0.228207
Bmock12	Mcc	Bm12I_mcnc_bin.15	100	77.6877	87.443	0	3855501	1	7668	0.320988	0.017186	-1.20659	7.69473	0.3225	0.283	0.3495	0.2925	0.3455	0.3015	0.3405	1	6947128	0.0339525	0.0334096	7.92232	94.03	0.026381	0.013636	0.098786	0.015	0.071668	0.016773	0.052597	0.996588	266085	0.0616269	0.0391128	2.71476	14.424	0.051734	0.020508	0.16869	0.0238762	0.132714	0.028419	0.10415	0.996588	266085	0.172354
Bmock12	Mcc	Bm12I_mcnc_bin.16	100	42.5338	59.6824	0	1528552	1	3049	0.203157	0.0138402	-0.405468	3.81461	0.204	0.1711	0.228	0.179	0.2245	0.186	0.2195	1	1131760	0.0541517	0.0299085	4.04094	26.3504	0.046972	0.027006	0.121886	0.029432	0.097574	0.032463	0.079745	1	44551	0.0865221	0.0429857	1.70741	7.3558	0.077007	0.032069	0.202765	0.03749	0.169787	0.044213	0.139696	1	44551	0.240676
Bmock12	Mcc	Bm12I_mcnc_bin.17	100	82.661	90.5075	0	3581975	1	7101	0.270016	0.016046	-1.10906	7.22496	0.2715	0.2345	0.297	0.244	0.2925	0.252	0.2875	1	5761315	0.1268	0.0586885	2.65031	13.5902	0.11221	0.063926	0.290841	0.069647	0.23041	0.076893	0.188971	0.988874	212878	0.0680474	0.0320922	1.52658	6.88952	0.0614655	0.0255039	0.149375	0.0296988	0.128935	0.035065	0.108857	0.988874	212878	0.298753
Bmock12	Mcc	Bm12I_mcnc_bin.18	100	67.396	80.5228	0	4719490	1	9384	0.366526	0.0176309	-0.568081	4.05815	0.368	0.33	0.397	0.3365	0.3925	0.343	0.3875	0.998203	10371735	0.017679	0.0106283	3.14805	25.0244	0.014704	0.006949	0.046093	0.007753	0.0386283	0.008816	0.030334	0.994776	395605	0.0352443	0.0189045	1.95715	9.8479	0.031288	0.011727	0.0835438	0.0138372	0.069569	0.01663	0.057697	0.994776	379756	0.122723
Bmock12	Mcc	Bm12I_mcnc_bin.19	76.669	95.5686	85.0818	30.4309	8978897	1	17848	0.367928	0.0167911	-0.428474	3.66467	0.369	0.333	0.3975	0.339	0.393	0.346	0.388	0.997122	37510791	0.0181387	0.0104531	2.48845	12.4459	0.015389	0.007124	0.04707	0.007982	0.037924	0.009132	0.029957	0.995791	1437360	0.0336757	0.0189657	1.64705	7.66728	0.029453	0.010047	0.081194	0.011916	0.069072	0.0145	0.057797	0.995791	1317876	0.121587
Bmock12	Mcc	Bm12I_mcnc_bin.1	100	99.9485	99.9743	0	4495340	1	8975	0.347344	0.0137492	-0.269932	3.80625	0.3475	0.3195	0.373	0.325	0.36915	0.3305	0.3645	0.999532	9894576	0.0230337	0.0132109	3.61843	25.5044	0.019667	0.010429	0.059924	0.011483	0.046336	0.01284	0.0357365	0.999532	390286	0.0288365	0.0242276	3.70435	21.7828	0.022313	0.008678	0.101023	0.01014	0.070068	0.012106	0.049108	0.999532	388521	0.123274
Bmock12	Mcc	Bm12I_mcnc_bin.20	99.9281	99.9485	99.9383	0.0719971	4498575	1	8979	0.347348	0.0137492	-0.270075	3.80622	0.3475	0.3195	0.373	0.325	0.3695	0.3305	0.3645	0.998814	9894576	0.0230337	0.0132109	3.61843	25.5044	0.019667	0.010429	0.059924	0.011483	0.046336	0.01284	0.0357365	0.998814	390286	0.0288365	0.0242276	3.70435	21.7828	0.022313	0.008678	0.101023	0.01014	0.070068	0.012106	0.049108	0.998814	388521	0.123274
Bmock12	Mcc	Bm12I_mcnc_bin.21	100	56.2995	72.0405	0	2023254	1	4034	0.199254	0.0162294	-0.193749	4.7592	0.2	0.164412	0.228587	0.172	0.2235	0.1795	0.218	1	1965153	0.0542591	0.0291103	3.12869	17.505	0.046713	0.02599	0.135153	0.028325	0.103365	0.031291	0.082351	1	76245	0.0931838	0.0439371	1.39202	5.80311	0.084009	0.03429	0.209781	0.0402158	0.179759	0.0476896	0.150137	1	76245	0.257035
Bmock12	Mcc	Bm12I_mcnc_bin.2	100	98.8333	99.4132	0	3551806	1	7083	0.200934	0.0153679	-0.313671	4.52319	0.202	0.1675	0.2285	0.174	0.224	0.182	0.219	1	6081328	0.0548415	0.0295927	3.45305	20.6086	0.047348	0.026719	0.131654	0.029067	0.101924	0.032067	0.082376	1	237705	0.0906989	0.0437403	1.51642	6.35264	0.081238	0.0337216	0.207552	0.039272	0.176677	0.046423	0.146626	1	237705	0.250796
Bmock12	Mcc	Bm12I_mcnc_bin.3	99.9108	94.6003	97.1831	0.0892564	4840526	1	9532	0.278581	0.0163796	-0.724912	3.96686	0.2805	0.2405	0.3055	0.2485	0.302	0.2575	0.2975	0.989414	9748320	0.0822033	0.0397299	3.06906	18.3257	0.072144	0.041595	0.186438	0.045161	0.153146	0.049708	0.124176	0.965938	351541	0.0655558	0.0309568	1.48658	6.35763	0.05895	0.024788	0.147126	0.028772	0.126879	0.033967	0.105723	0.965938	351541	0.2758
Bmock12	Mcc	Bm12I_mcnc_bin.4	98.6658	95.507	97.0607	1.35219	4381227	1	8246	0.281263	0.0208701	-0.603292	5.48097	0.2815	0.238063	0.321	0.2485	0.314	0.257	0.306	0.92082	4543605	0.10941	0.0678678	3.2225	17.7962	0.092177	0.044583	0.299819	0.049805	0.222581	0.056642	0.173378	0.757386	111156	0.0695523	0.0312704	1.18706	5.10957	0.0637045	0.025879	0.147144	0.0300535	0.1296	0.03575	0.110931	0.757386	111156	0.224629
Bmock12	Mcc	Bm12I_mcnc_bin.5	50.7623	84.9238	63.5426	96.9967	8266631	1	16263	0.271893	0.0174193	-0.866893	6.02142	0.273	0.234	0.302	0.243	0.297	0.2515	0.2915	0.978564	28565461	0.123401	0.0604819	2.47861	12.5986	0.109632	0.052704	0.291101	0.060186	0.231601	0.069655	0.187632	0.960495	1037520	0.0710446	0.0331683	1.14998	5.4122	0.065952	0.023029	0.149951	0.027577	0.13133	0.033884	0.113457	0.960495	1037520	0.287828
Bmock12	Mcc	Bm12I_mcnc_bin.6	48.2358	1.59774	3.09302	107.315	393720	1	723	0.24084	0.0273924	-0.507745	3.11149	0.2435	0.18005	0.28995	0.1885	0.28	0.2006	0.2724	0.845007	26796	0.212787	0.0878409	0.981803	4.40364	0.19672	0.0765164	0.432286	0.099392	0.385391	0.120646	0.331466	0.638718	496	0.134476	0.0643427	1.3129	5.41076	0.124595	0.0421612	0.301284	0.052041	0.261703	0.0658785	0.219074	0.638718	496	0.349234
Bmock12	Mcc	Bm12I_mcnc_bin.7	100	36.3123	53.2781	0	3063916	1	6026	0.214456	0.0178332	-0.513877	3.85409	0.216	0.1745	0.2445	0.1825	0.240375	0.191	0.2355	0.994226	3851700	0.0948107	0.0472138	3.60282	21.8598	0.083653	0.049283	0.206335	0.053379	0.165457	0.05852	0.137154	0.981955	132870	0.0579981	0.0353047	3.30754	21.3059	0.050256	0.0203537	0.14595	0.0237044	0.114758	0.0281369	0.0923943	0.981955	132870	0.222189
Bmock12	Mcc	Bm12I_mcnc_bin.8	100	20.102	33.4749	0	997628	1	1970	0.289416	0.0161491	-0.0970295	3.08588	0.2895	0.257	0.3215	0.263	0.315275	0.26895	0.3095	1	419986	0.0679657	0.0287031	1.48007	5.92551	0.060535	0.0324796	0.143634	0.035996	0.125392	0.040192	0.106972	1	14706	0.0851796	0.0344538	0.943329	4.34472	0.0800215	0.0327356	0.16812	0.0391068	0.150264	0.0463555	0.130505	1	14706	0.224541
Bmock12	Mcc	Bm12I_mcnc_bin.9	100	77.6877	87.443	0	3865701	1	7682	0.320994	0.0171874	-1.20485	7.68352	0.3225	0.283	0.3495	0.2925	0.3455	0.3015	0.3405	0.997361	6947128	0.0339525	0.0334096	7.92232	94.03	0.026381	0.013636	0.098786	0.015	0.071668	0.016773	0.052597	0.993958	266085	0.0616269	0.0391128	2.71476	14.424	0.051734	0.020508	0.16869	0.0238762	0.132714	0.028419	0.10415	0.993958	266085	0.172354
MBARC-26	Mc	Mb26I_mc_bin.10	100	5.19664	9.87986	0	241850	1	479	0.220157	0.0337043	-0.30313	2.56475	0.221	0.146925	0.274	0.1613	0.2715	0.1745	0.2645	1	25878	0.159756	0.0964631	1.04852	3.7901	0.136416	0.0331244	0.40235	0.0447928	0.35835	0.0594481	0.298313	1	903	0.0758728	0.0344323	0.741879	3.52568	0.070977	0.0225658	0.154767	0.0294512	0.137211	0.0356404	0.121639	1	903	0.239053
MBARC-26	Mc	Mb26I_mc_bin.11	99.6255	98.6201	99.1203	0.375902	3223818	1	6416	0.14054	0.0166182	0.00407576	3.09733	0.141	0.108	0.172313	0.113375	0.167	0.119	0.162	0.994088	4909411	0.0216538	0.0131359	3.31711	19.9914	0.018444	0.008718	0.056623	0.009763	0.042879	0.011144	0.034145	0.990932	190653	0.12178	0.0513158	0.97519	4.39382	0.113427	0.046243	0.243861	0.0538326	0.218199	0.0640512	0.190574	0.990932	190653	0.242296
MBARC-26	Mc	Mb26I_mc_bin.12	99.3587	98.6374	98.9967	0.645437	3745356	1	7438	0.268348	0.0132299	-0.458074	4.28672	0.269	0.2385	0.292038	0.2465	0.2885	0.2525	0.284	0.994176	6521466	0.148146	0.0551928	2.21185	11.411	0.1364	0.08088	0.288507	0.087724	0.245354	0.096258	0.210561	0.988481	250278	0.115675	0.0541531	1.79691	9.28047	0.105433	0.0437548	0.24789	0.0511399	0.212663	0.060525	0.181118	0.988481	250278	0.339961
MBARC-26	Mc	Mb26I_mc_bin.13	100	99.7008	99.8502	0	3531657	1	7053	0.225887	0.014119	0.170966	4.01728	0.226	0.1985	0.254	0.2035	0.2485	0.2085	0.243	0.999395	6133753	0.102404	0.0442422	2.78715	15.7958	0.092129	0.053788	0.219838	0.058381	0.179962	0.064214	0.148406	0.999395	242556	0.128432	0.056749	1.1044	4.74883	0.118355	0.0476899	0.268784	0.055566	0.236341	0.066114	0.203521	0.999395	242556	0.290267
MBARC-26	Mc	Mb26I_mc_bin.14	100	99.5309	99.7649	0	2042270	1	4077	0.323292	0.0204541	-1.12838	5.61788	0.3265	0.269	0.355	0.2845	0.3495	0.298	0.345	1	2039190	0.0560385	0.0528094	4.07236	23.6525	0.040695	0.019509	0.214737	0.021736	0.138661	0.024628	0.0967691	1	80200	0.0589197	0.0357878	2.49574	13.2357	0.0506355	0.01863	0.153255	0.0221367	0.121322	0.0266049	0.0980092	1	80200	0.193838
MBARC-26	Mc	Mb26I_mc_bin.15	100	99.3704	99.6842	0	3137646	1	6245	0.334035	0.0161439	-1.00297	5.4895	0.3355	0.295	0.36	0.305	0.356	0.3145	0.352	0.999153	4658878	0.0284504	0.0140756	2.60772	13.5166	0.024839	0.013479	0.0665211	0.014783	0.054545	0.016446	0.043893	0.996991	179700	0.112321	0.0512896	1.17448	4.7572	0.101755	0.0418055	0.24186	0.0487038	0.213691	0.057611	0.182339	0.996991	179700	0.19636
MBARC-26	Mc	Mb26I_mc_bin.16	100	93.5687	96.6775	0	4354660	1	8684	0.246493	0.0236086	-0.945706	4.97494	0.249	0.19	0.284963	0.2025	0.28	0.217	0.2735	1	9148503	0.142267	0.0786295	1.87211	7.26985	0.117532	0.060117	0.364726	0.065948	0.309109	0.073516	0.247935	1	356590	0.0622762	0.0425692	4.33265	34.4993	0.052433	0.0213157	0.154216	0.024718	0.125926	0.029255	0.102062	1	356590	0.195033
MBARC-26	Mc	Mb26I_mc_bin.17	68.7712	3.69974	7.02172	45.4098	232090	1	456	0.271999	0.0323966	0.0482467	2.22616	0.2705	0.215375	0.3295	0.221375	0.325125	0.23025	0.317	1	21736	0.191132	0.13027	1.00557	3.21971	0.148128	0.0289329	0.511637	0.0408452	0.467893	0.0576845	0.391014	0.961153	741	0.164539	0.076115	0.523325	2.5295	0.150215	0.046841	0.324995	0.057069	0.302785	0.077657	0.280265	0.961153	741	0.249792
MBARC-26	Mc	Mb26I_mc_bin.18	46.6349	96.7892	62.9428	114.432	10361830	1	20455	0.208173	0.0216255	-0.0799746	3.38191	0.209	0.1645	0.2485	0.17235	0.2415	0.1805	0.2345	0.989648	46344378	0.103272	0.0535346	2.55965	15.7564	0.090833	0.041861	0.234411	0.047061	0.198144	0.053956	0.165395	0.975334	1686366	0.213739	0.0869077	0.803981	3.80449	0.201345	0.0805491	0.415709	0.094491	0.37509	0.112989	0.331251	0.975334	1686366	0.344136
MBARC-26	Mc	Mb26I_mc_bin.19	100	89.6625	94.5495	0	3336942	1	6396	0.31417	0.0165786	0.0136588	4.69788	0.3135	0.2835	0.3495	0.2885	0.3425	0.295	0.3355	0.967865	3262735	0.0506137	0.0250097	6.07244	68.915	0.045957	0.025511	0.09738	0.027953	0.084404	0.031035	0.0729566	0.890977	90951	0.0651932	0.0435227	1.72435	6.42114	0.050779	0.019377	0.18293	0.0225295	0.159453	0.026762	0.129118	0.890977	90951	0.194643
MBARC-26	Mc	Mb26I_mc_bin.1	100	97.5693	98.7697	0	4488666	1	8954	0.313385	0.0188912	-1.2952	6.7452	0.316	0.2685	0.3425	0.28	0.3385	0.291	0.334	1	9743905	0.0492777	0.0490519	6.21258	57.4313	0.037054	0.017628	0.160131	0.019663	0.115459	0.022342	0.080074	0.99779	378885	0.0393054	0.0242922	2.67186	14.5976	0.033325	0.012981	0.102251	0.015197	0.0816816	0.018128	0.065884	0.99779	378885	0.196958
MBARC-26	Mc	Mb26I_mc_bin.20	100	77.454	87.2947	0	3373528	1	6647	0.30986	0.0232124	-0.995866	7.64258	0.311	0.261	0.350425	0.274	0.3435	0.284	0.336	0.993359	4735503	0.047584	0.0583221	7.66083	75.152	0.035239	0.016913	0.15609	0.018838	0.101761	0.021358	0.071803	0.988062	167910	0.0416525	0.0281139	4.32883	35.4178	0.035393	0.013805	0.103039	0.0161965	0.0838071	0.019305	0.0682792	0.988062	167910	0.157538
MBARC-26	Mc	Mb26I_mc_bin.21	37.1133	98.9254	53.9765	169.445	12334779	1	23957	0.255597	0.0258576	-1.08733	4.60306	0.2605	0.1885	0.29405	0.204	0.289	0.2205	0.283	0.96284	54251736	0.150606	0.0900039	1.71923	6.15772	0.121369	0.055694	0.407225	0.062259	0.346542	0.070981	0.276041	0.910394	1788886	0.0575984	0.0315701	2.69113	20.7534	0.050844	0.019397	0.1317	0.0227523	0.11454	0.027221	0.096048	0.910394	1788886	0.183492
[truncated: 370 more rows]
[truncated: 31 more columns]

## Sheet: Supplementary Table 6
	MAGISTA RF: IncNodePurity				MAGISTIC RF:IncNodePurity
[truncated: 145 more rows]

[truncated: 1 more sheets: Column descriptions]
